# Supplementary material
Source: publisher site journal article supplement (https://www.spandidos-publications.com/3142/downloadSupplementary)
Supplement: Supplementary file 1 [file downloadSupplementary]

## Sheet: BP
Table SIIA. Statistically significant GO terms in the category of biological process for AKI-24 h/AKI-Pre.
maxLevel	levels	GO_Name	GO_ID	Pvalue	Pvalue_adjusted	PAS_Value	PAS_Zscore	max_zscore	min_zscore	Genes	Count	Pop_Hit	List_Total	Background_Genes	URL	PATHS
2	2	multicellular organismal process	GO:0032501	9.91e-27	3.29e-23	73.12	7.16	12.23	-2.88385	ALB|1.2246;LRP2|0.4365;TF|1.2823;CUBN|0.3597;C3|1.4997;PIGR|0.7586;FBN1|0.207;ANPEP|12.0226;ENPEP|21.0863;SERPINA1|29.3765;MGAM|7.379;SERPINA3|19.2309;DPP4|4.7424;PSAP|7.656;A2M|7.5858;GAA|14.4544;KRT13|0.278;EFEMP1|0.0904;APOA4|15.2757;SPP1|0.1406;VASN|0.1738;F2|0.1009;GGT1|5.2;SERPINA5|0.2109;CDH1|0.7311;ANXA1|0.2089;SERPINC1|3.4674;APOA1|18.8799;MME|5.2481;ROBO4|23.1206;NAGLU|8.3946;HSPA8|4.32…	96	8180	159	38520	http://www.ebi.ac.uk/QuickGO/GTerm?id=GO:0032501	[]
3	3	single-multicellular organism process	GO:0044707	1.12e-25	1.86e-22	70.8	6.92	12.23	-2.88385	ALB|1.2246;LRP2|0.4365;TF|1.2823;CUBN|0.3597;C3|1.4997;PIGR|0.7586;FBN1|0.207;ANPEP|12.0226;ENPEP|21.0863;SERPINA1|29.3765;MGAM|7.379;SERPINA3|19.2309;DPP4|4.7424;PSAP|7.656;A2M|7.5858;GAA|14.4544;KRT13|0.278;EFEMP1|0.0904;APOA4|15.2757;SPP1|0.1406;VASN|0.1738;F2|0.1009;SERPINA5|0.2109;CDH1|0.7311;ANXA1|0.2089;SERPINC1|3.4674;APOA1|18.8799;MME|5.2481;ROBO4|23.1206;NAGLU|8.3946;HSPA8|4.3251;TPI1|1…	93	7897	159	38520	http://www.ebi.ac.uk/QuickGO/GTerm?id=GO:0044707	[]
4	4	response to wounding	GO:0009611	3.91e-24	4.33e-21	28.39	2.58	12.23	-2.88385	ALB|1.2246;TF|1.2823;C3|1.4997;C4A|0.673;SERPINA1|29.3765;PSAP|7.656;A2M|7.5858;SPP1|0.1406;F2|0.1009;GGT1|5.2;SERPINA5|0.2109;ANXA1|0.2089;SERPINC1|3.4674;APOA1|18.8799;HBB|1.6904;CD55|0.2535;FBLN1|0.1067;SOD1|16.1436;APOH|11.9124;ALDOA|1.7378;PROZ|13.0617;PPIA|7.5858;SERPINF1|3.2509;S100A8|0.2965;ACTN4|10.8643;CD177|1.9953;S100A9|0.3945;ANXA5|3.6308;PARK7|5.445;HBD|45.2898;GSTP1|11.8032;FGG|3.0…	38	1110	159	38520	http://www.ebi.ac.uk/QuickGO/GTerm?id=GO:0009611	[]
4	4	response to inorganic substance	GO:0010035	2.27e-23	1.88e-20	18.8	1.6	12.23	-2.88385	C3|1.4997;PSAP|7.656;HP|6.6069;APOA4|15.2757;CDH1|0.7311;ANXA1|0.2089;HBB|1.6904;FBLN5|0.2249;IGFBP2|0.2754;PRDX2|35.6451;CAT|15.417;SOD1|16.1436;ASS1|2.4889;HBA1|1.6144;PRDX1|3.1623;SERPINF1|3.2509;S100A8|0.2965;S100A9|0.3945;ANXA5|3.6308;PARK7|5.445;SORD|1.7219;FABP1|14.3219;FGG|3.0479;TXN|16.4437;SCGB1A1|0.3532;CPNE3|1.6293;PLEKHA1|85.5067	27	454	159	38520	http://www.ebi.ac.uk/QuickGO/GTerm?id=GO:0010035	[]
3	3	response to stress	GO:0006950	9.75e-23	6.48e-20	58.94	5.7	12.23	-2.88385	ALB|1.2246;TF|1.2823;C3|1.4997;C4A|0.673;SERPINA1|29.3765;SERPINA3|19.2309;DPP4|4.7424;PSAP|7.656;A2M|7.5858;HP|6.6069;IGHG2|17.378;APOA4|15.2757;SPP1|0.1406;VASN|0.1738;F2|0.1009;GGT1|5.2;SERPINA5|0.2109;ANXA1|0.2089;SERPINC1|3.4674;APOA1|18.8799;HSPA8|4.3251;GAPDH|6.0256;HBB|1.6904;CD55|0.2535;FBLN5|0.2249;KLK3|4.4875;FBLN1|0.1067;PRDX2|35.6451;IGHG1|1.3062;CAT|15.417;SOD1|16.1436;APOH|11.9124;…	75	5602	159	38520	http://www.ebi.ac.uk/QuickGO/GTerm?id=GO:0006950	[]
2	2	immune system process	GO:0002376	2.29e-20	1.27e-17	40.44	3.81	12.23	-2.88385	TF|1.2823;C3|1.4997;PIGR|0.7586;C4A|0.673;DPP4|4.7424;A2M|7.5858;HP|6.6069;IGHG2|17.378;APOA4|15.2757;SPP1|0.1406;F2|0.1009;GGT1|5.2;CDH1|0.7311;ANXA1|0.2089;APOA1|18.8799;OLFM4|0.2512;GAPDH|6.0256;CD55|0.2535;CD248|0.5297;IGFBP2|0.2754;KLK3|4.4875;IGHG1|1.3062;SOD1|16.1436;PPIA|7.5858;ASS1|2.4889;PVRL2|0.0887;PRDX1|3.1623;LCN2|0.2051;HSPA1B|4.3652;S100A8|0.2965;CD177|1.9953;S100A9|0.3945;MADCAM1…	55	3265	159	38520	http://www.ebi.ac.uk/QuickGO/GTerm?id=GO:0002376	[]
5	5	response to reactive oxygen species	GO:0000302	3.31e-20	1.57e-17	17.68	1.48	12.23	-2.88385	PSAP|7.656;HP|6.6069;APOA4|15.2757;ANXA1|0.2089;HBB|1.6904;FBLN5|0.2249;PRDX2|35.6451;CAT|15.417;SOD1|16.1436;HBA1|1.6144;PRDX1|3.1623;PRDX6|6.9183;GPX3|15.1356;PARK7|5.445;GSTP1|11.8032;FABP1|14.3219;TXN|16.4437;SCGB1A1|0.3532;PLEKHA1|85.5067	19	208	159	38520	http://www.ebi.ac.uk/QuickGO/GTerm?id=GO:0000302	[]
3	3	regulation of biological quality	GO:0065008	4.41e-20	1.83e-17	50.82	4.87	12.23	-2.88385	ALB|1.2246;TF|1.2823;CUBN|0.3597;C3|1.4997;PIGR|0.7586;FBN1|0.207;ANPEP|12.0226;ENPEP|21.0863;SERPINA1|29.3765;SERPINA3|19.2309;PSAP|7.656;A2M|7.5858;GAA|14.4544;APOA4|15.2757;SPP1|0.1406;F2|0.1009;SERPINA5|0.2109;ANXA1|0.2089;SERPINC1|3.4674;APOA1|18.8799;MME|5.2481;HSPA8|4.3251;GAPDH|6.0256;HBB|1.6904;CD55|0.2535;HEXB|2.729;FBLN1|0.1067;HEG1|0.0839;SOD1|16.1436;APOH|11.9124;CPE|4.4055;ALDOA|1.7…	64	4523	159	38520	http://www.ebi.ac.uk/QuickGO/GTerm?id=GO:0065008	[]
5	5	wound healing	GO:0042060	1.02e-19	3.77e-17	22.91	2.02	12.23	-2.88385	ALB|1.2246;TF|1.2823;C3|1.4997;SERPINA1|29.3765;PSAP|7.656;A2M|7.5858;F2|0.1009;SERPINA5|0.2109;ANXA1|0.2089;SERPINC1|3.4674;APOA1|18.8799;HBB|1.6904;FBLN1|0.1067;SOD1|16.1436;APOH|11.9124;ALDOA|1.7378;PROZ|13.0617;PPIA|7.5858;S100A8|0.2965;ACTN4|10.8643;CD177|1.9953;S100A9|0.3945;ANXA5|3.6308;HBD|45.2898;FGG|3.0479;CD63|2.0893;MYLK|0.6427;CDC42|99.0832;KLK6|0.0113	29	761	159	38520	http://www.ebi.ac.uk/QuickGO/GTerm?id=GO:0042060	[]
4	4	defense response	GO:0006952	1.68e-19	5.57e-17	34.98	3.25	12.23	-2.88385	C3|1.4997;C4A|0.673;SERPINA1|29.3765;SERPINA3|19.2309;DPP4|4.7424;A2M|7.5858;HP|6.6069;IGHG2|17.378;APOA4|15.2757;SPP1|0.1406;F2|0.1009;GGT1|5.2;ANXA1|0.2089;SERPINC1|3.4674;APOA1|18.8799;GAPDH|6.0256;CD55|0.2535;KLK3|4.4875;IGHG1|1.3062;ASS1|2.4889;PVRL2|0.0887;PRDX1|3.1623;LCN2|0.2051;SERPINF1|3.2509;HSPA1B|4.3652;S100A8|0.2965;LYZ|0.5445;S100A9|0.3945;ANXA5|3.6308;P06314|0.1076;PARK7|5.445;GST…	45	2221	159	38520	http://www.ebi.ac.uk/QuickGO/GTerm?id=GO:0006952	[]
3	3	single-organism metabolic process	GO:0044710	5.17e-19	1.56e-16	74.38	7.29	12.23	-2.88385	ALB|1.2246;LRP2|0.4365;TF|1.2823;CUBN|0.3597;C3|1.4997;C4A|0.673;ENPEP|21.0863;MGAM|7.379;SERPINA3|19.2309;PSAP|7.656;A2M|7.5858;HP|6.6069;IGHG2|17.378;GAA|14.4544;APOA4|15.2757;F2|0.1009;GGT1|5.2;ANXA1|0.2089;SERPINC1|3.4674;APOA1|18.8799;MME|5.2481;ACY1|17.378;NAGLU|8.3946;PGK1|6.0256;ENO1|7.8705;GLB1|2.5119;HSPA8|4.3251;TPI1|15.2757;GAPDH|6.0256;HBB|1.6904;CD55|0.2535;CA1|26.3027;GNS|3.8019;FB…	92	9513	159	38520	http://www.ebi.ac.uk/QuickGO/GTerm?id=GO:0044710	[]
4	4	small molecule metabolic process	GO:0044281	8.89e-19	2.46e-16	42.39	4.01	12.23	-2.88385	ALB|1.2246;LRP2|0.4365;CUBN|0.3597;C3|1.4997;MGAM|7.379;PSAP|7.656;GAA|14.4544;APOA4|15.2757;GGT1|5.2;ANXA1|0.2089;APOA1|18.8799;MME|5.2481;ACY1|17.378;NAGLU|8.3946;PGK1|6.0256;ENO1|7.8705;GLB1|2.5119;HSPA8|4.3251;TPI1|15.2757;GAPDH|6.0256;HBB|1.6904;CA1|26.3027;GNS|3.8019;ACPP|5.4954;ARSA|15.8489;HEXB|2.729;ASAH1|4.9204;LDHB|8.9536;CAT|15.417;SOD1|16.1436;BHMT|13.5519;ALDOA|1.7378;ASS1|2.4889;HB…	56	3670	159	38520	http://www.ebi.ac.uk/QuickGO/GTerm?id=GO:0044281	[]
2	2	response to stimulus	GO:0050896	1.68e-18	4.29e-16	82.38	8.1	12.23	-2.88385	ALB|1.2246;LRP2|0.4365;TF|1.2823;C3|1.4997;PIGR|0.7586;FBN1|0.207;C4A|0.673;SERPINA1|29.3765;SERPINA3|19.2309;DPP4|4.7424;PSAP|7.656;A2M|7.5858;HP|6.6069;IGHG2|17.378;KRT13|0.278;EFEMP1|0.0904;APOA4|15.2757;SPP1|0.1406;VASN|0.1738;F2|0.1009;GGT1|5.2;SERPINA5|0.2109;CDH1|0.7311;ANXA1|0.2089;SERPINC1|3.4674;APOA1|18.8799;MME|5.2481;ACY1|17.378;ENO1|7.8705;HSPA8|4.3251;OLFM4|0.2512;GAPDH|6.0256;HBB|…	109	13260	159	38520	http://www.ebi.ac.uk/QuickGO/GTerm?id=GO:0050896	[]
5	5	blood coagulation	GO:0007596	3.1e-18	7.35e-16	19.57	1.67	12.23	-2.88385	ALB|1.2246;TF|1.2823;C3|1.4997;SERPINA1|29.3765;PSAP|7.656;A2M|7.5858;F2|0.1009;SERPINA5|0.2109;SERPINC1|3.4674;APOA1|18.8799;HBB|1.6904;FBLN1|0.1067;SOD1|16.1436;APOH|11.9124;ALDOA|1.7378;PROZ|13.0617;PPIA|7.5858;ACTN4|10.8643;CD177|1.9953;S100A9|0.3945;ANXA5|3.6308;HBD|45.2898;FGG|3.0479;CD63|2.0893;CDC42|99.0832	25	586	159	38520	http://www.ebi.ac.uk/QuickGO/GTerm?id=GO:0007596	[]
5	5	hemostasis	GO:0007599	3.78e-18	8.38e-16	19.57	1.67	12.23	-2.88385	ALB|1.2246;TF|1.2823;C3|1.4997;SERPINA1|29.3765;PSAP|7.656;A2M|7.5858;F2|0.1009;SERPINA5|0.2109;SERPINC1|3.4674;APOA1|18.8799;HBB|1.6904;FBLN1|0.1067;SOD1|16.1436;APOH|11.9124;ALDOA|1.7378;PROZ|13.0617;PPIA|7.5858;ACTN4|10.8643;CD177|1.9953;S100A9|0.3945;ANXA5|3.6308;HBD|45.2898;FGG|3.0479;CD63|2.0893;CDC42|99.0832	25	591	159	38520	http://www.ebi.ac.uk/QuickGO/GTerm?id=GO:0007599	[]
4	4	coagulation	GO:0050817	4.26e-18	8.85e-16	19.57	1.67	12.23	-2.88385	ALB|1.2246;TF|1.2823;C3|1.4997;SERPINA1|29.3765;PSAP|7.656;A2M|7.5858;F2|0.1009;SERPINA5|0.2109;SERPINC1|3.4674;APOA1|18.8799;HBB|1.6904;FBLN1|0.1067;SOD1|16.1436;APOH|11.9124;ALDOA|1.7378;PROZ|13.0617;PPIA|7.5858;ACTN4|10.8643;CD177|1.9953;S100A9|0.3945;ANXA5|3.6308;HBD|45.2898;FGG|3.0479;CD63|2.0893;CDC42|99.0832	25	594	159	38520	http://www.ebi.ac.uk/QuickGO/GTerm?id=GO:0050817	[]
5	5	hydrogen peroxide metabolic process	GO:0042743	2.14e-17	4.18e-15	9.64	0.66	12.23	-2.88385	HP|6.6069;APOA4|15.2757;HBB|1.6904;PRDX2|35.6451;CAT|15.417;SOD1|16.1436;HBA1|1.6144;PRDX1|3.1623;PRDX6|6.9183;GPX3|15.1356;PARK7|5.445	11	43	159	38520	http://www.ebi.ac.uk/QuickGO/GTerm?id=GO:0042743	[]
3	3	regulation of response to stimulus	GO:0048583	4.07e-17	7.52e-15	45.61	4.34	12.23	-2.88385	TF|1.2823;C3|1.4997;PIGR|0.7586;FBN1|0.207;C4A|0.673;PSAP|7.656;A2M|7.5858;HP|6.6069;IGHG2|17.378;SPP1|0.1406;VASN|0.1738;F2|0.1009;GGT1|5.2;CDH1|0.7311;SERPINC1|3.4674;APOA1|18.8799;HSPA8|4.3251;OLFM4|0.2512;CD55|0.2535;FBLN5|0.2249;IGFBP2|0.2754;ACPP|5.4954;FBLN1|0.1067;IGHG1|1.3062;CAT|15.417;SOD1|16.1436;APOH|11.9124;PVRL2|0.0887;PRDX1|3.1623;SERPINF1|3.2509;HSPA1B|4.3652;S100A8|0.2965;ACTN4|…	60	4568	159	38520	http://www.ebi.ac.uk/QuickGO/GTerm?id=GO:0048583	[]
3	3	response to chemical	GO:0042221	4.48e-17	7.84e-15	49.11	4.7	12.23	-2.88385	C3|1.4997;PIGR|0.7586;FBN1|0.207;PSAP|7.656;HP|6.6069;KRT13|0.278;APOA4|15.2757;SPP1|0.1406;VASN|0.1738;GGT1|5.2;CDH1|0.7311;ANXA1|0.2089;SERPINC1|3.4674;APOA1|18.8799;MME|5.2481;ACY1|17.378;HSPA8|4.3251;GAPDH|6.0256;HBB|1.6904;CD55|0.2535;FBLN5|0.2249;IGFBP2|0.2754;PRDX2|35.6451;CAT|15.417;SOD1|16.1436;ACP2|2.5823;ASS1|2.4889;HBA1|1.6144;PRDX1|3.1623;IDH1|2.3335;SERPINF1|3.2509;HSPA1B|4.3652;GST…	63	5027	159	38520	http://www.ebi.ac.uk/QuickGO/GTerm?id=GO:0042221	[]
4	4	regulation of body fluid levels	GO:0050878	7.75e-17	1.29e-14	20.64	1.78	12.23	-2.88385	ALB|1.2246;TF|1.2823;C3|1.4997;SERPINA1|29.3765;PSAP|7.656;A2M|7.5858;F2|0.1009;SERPINA5|0.2109;SERPINC1|3.4674;APOA1|18.8799;HBB|1.6904;FBLN1|0.1067;HEG1|0.0839;SOD1|16.1436;APOH|11.9124;ALDOA|1.7378;PROZ|13.0617;PPIA|7.5858;ACTN4|10.8643;CD177|1.9953;S100A9|0.3945;ANXA5|3.6308;HBD|45.2898;FGG|3.0479;CD63|2.0893;CDC42|99.0832	26	744	159	38520	http://www.ebi.ac.uk/QuickGO/GTerm?id=GO:0050878	[]
2	2	locomotion	GO:0040011	9.41e-17	1.49e-14	29.7	2.71	12.23	-2.88385	TF|1.2823;ANPEP|12.0226;ENPEP|21.0863;DPP4|4.7424;SPP1|0.1406;F2|0.1009;ANXA1|0.2089;APOA1|18.8799;ROBO4|23.1206;HSPA8|4.3251;OLFM4|0.2512;CD55|0.2535;CD248|0.5297;HEXB|2.729;FBLN1|0.1067;APOH|11.9124;PPIA|7.5858;PVRL2|0.0887;SERPINF1|3.2509;HSPA1B|4.3652;S100A8|0.2965;ACTN4|10.8643;SH3BGRL3|0.0461;CD177|1.9953;S100A9|0.3945;MADCAM1|0.7178;ANXA5|3.6308;SORD|1.7219;EPHB4|0.6081;HSP90AA1|11.5878;DA…	40	2047	159	38520	http://www.ebi.ac.uk/QuickGO/GTerm?id=GO:0040011	[]
5	4,5	hydrogen peroxide catabolic process	GO:0042744	1.31e-16	1.98e-14	7.7	0.46	12.23	-2.88385	HP|6.6069;APOA4|15.2757;HBB|1.6904;PRDX2|35.6451;CAT|15.417;HBA1|1.6144;PRDX1|3.1623;PRDX6|6.9183;GPX3|15.1356	9	22	159	38520	http://www.ebi.ac.uk/QuickGO/GTerm?id=GO:0042744	[]
3	3	negative regulation of cellular process	GO:0048523	6.76e-16	9.76e-14	49.92	4.78	12.23	-2.88385	ALB|1.2246;C3|1.4997;FBN1|0.207;C4A|0.673;SERPINA1|29.3765;SERPINA3|19.2309;DPP4|4.7424;PSAP|7.656;A2M|7.5858;HP|6.6069;EFEMP1|0.0904;APOA4|15.2757;SPP1|0.1406;VASN|0.1738;F2|0.1009;SERPINA5|0.2109;CDH1|0.7311;ANXA1|0.2089;IGFBP7|0.0655;SERPINC1|3.4674;APOA1|18.8799;ENO1|7.8705;HSPA8|4.3251;OLFM4|0.2512;GAPDH|6.0256;CD55|0.2535;ANXA4|3.342;FBLN1|0.1067;PRDX2|35.6451;CAT|15.417;SOD1|16.1436;APOH|1…	61	5003	159	38520	http://www.ebi.ac.uk/QuickGO/GTerm?id=GO:0048523	[]
5	5	regulation of response to wounding	GO:1903034	1.42e-15	1.96e-13	12.59	0.96	12.23	-2.88385	C3|1.4997;C4A|0.673;A2M|7.5858;SPP1|0.1406;F2|0.1009;GGT1|5.2;SERPINC1|3.4674;APOA1|18.8799;CD55|0.2535;APOH|11.9124;SERPINF1|3.2509;S100A8|0.2965;S100A9|0.3945;ANXA5|3.6308;PARK7|5.445;GSTP1|11.8032;FGG|3.0479;SCGB1A1|0.3532;ELANE|0.4246;MYLK|0.6427	20	425	159	38520	http://www.ebi.ac.uk/QuickGO/GTerm?id=GO:1903034	[]
9	6,8,9	platelet degranulation	GO:0002576	1.89e-15	2.51e-13	8.87	0.58	12.23	-2.88385	ALB|1.2246;TF|1.2823;SERPINA1|29.3765;PSAP|7.656;A2M|7.5858;APOA1|18.8799;SOD1|16.1436;ALDOA|1.7378;PPIA|7.5858;ACTN4|10.8643;FGG|3.0479;CD63|2.0893	12	86	159	38520	http://www.ebi.ac.uk/QuickGO/GTerm?id=GO:0002576	[]
3	3	cell motility	GO:0048870	2.21e-15	2.72e-13	24.64	2.19	12.23	-2.88385	TF|1.2823;ENPEP|21.0863;DPP4|4.7424;SPP1|0.1406;F2|0.1009;ANXA1|0.2089;APOA1|18.8799;ROBO4|23.1206;OLFM4|0.2512;CD248|0.5297;HEXB|2.729;FBLN1|0.1067;APOH|11.9124;PPIA|7.5858;SERPINF1|3.2509;S100A8|0.2965;ACTN4|10.8643;SH3BGRL3|0.0461;CD177|1.9953;S100A9|0.3945;MADCAM1|0.7178;ANXA5|3.6308;SORD|1.7219;EPHB4|0.6081;DAG1|3.02;CD63|2.0893;ELANE|0.4246;ACE|2.2909;ACVR1B|0.1294;ARHGDIA|31.3329;MYLK|0.64…	34	1591	159	38520	http://www.ebi.ac.uk/QuickGO/GTerm?id=GO:0048870	[]
3	3	localization of cell	GO:0051674	2.21e-15	2.72e-13	24.64	2.19	12.23	-2.88385	TF|1.2823;ENPEP|21.0863;DPP4|4.7424;SPP1|0.1406;F2|0.1009;ANXA1|0.2089;APOA1|18.8799;ROBO4|23.1206;OLFM4|0.2512;CD248|0.5297;HEXB|2.729;FBLN1|0.1067;APOH|11.9124;PPIA|7.5858;SERPINF1|3.2509;S100A8|0.2965;ACTN4|10.8643;SH3BGRL3|0.0461;CD177|1.9953;S100A9|0.3945;MADCAM1|0.7178;ANXA5|3.6308;SORD|1.7219;EPHB4|0.6081;DAG1|3.02;CD63|2.0893;ELANE|0.4246;ACE|2.2909;ACVR1B|0.1294;ARHGDIA|31.3329;MYLK|0.64…	34	1591	159	38520	http://www.ebi.ac.uk/QuickGO/GTerm?id=GO:0051674	[]
4	4	single-organism catabolic process	GO:0044712	2.39e-15	2.83e-13	27.19	2.45	12.23	-2.88385	ENPEP|21.0863;HP|6.6069;GAA|14.4544;APOA4|15.2757;APOA1|18.8799;PGK1|6.0256;ENO1|7.8705;GLB1|2.5119;TPI1|15.2757;GAPDH|6.0256;HBB|1.6904;GNS|3.8019;HEXB|2.729;PRDX2|35.6451;CAT|15.417;ALDOA|1.7378;HBA1|1.6144;PRDX1|3.1623;IDH1|2.3335;PRDX6|6.9183;GPX3|15.1356;ANXA5|3.6308;PARK7|5.445;SORD|1.7219;FABP1|14.3219;AHCY|2.6546;PNP|7.7983;FUCA1|12.942;ELANE|0.4246;ACE|2.2909;FAH|5.445;MYLK|0.6427;GUSB|0…	35	1699	159	38520	http://www.ebi.ac.uk/QuickGO/GTerm?id=GO:0044712	[]
5	5	inflammatory response	GO:0006954	4.24e-15	4.86e-13	16.52	1.36	12.23	-2.88385	C3|1.4997;C4A|0.673;SERPINA1|29.3765;SERPINA3|19.2309;A2M|7.5858;HP|6.6069;SPP1|0.1406;F2|0.1009;GGT1|5.2;ANXA1|0.2089;SERPINC1|3.4674;APOA1|18.8799;CD55|0.2535;ASS1|2.4889;SERPINF1|3.2509;S100A8|0.2965;LYZ|0.5445;S100A9|0.3945;PARK7|5.445;GSTP1|11.8032;AHCY|2.6546;SCGB1A1|0.3532;ELANE|0.4246;ECM1|7.9433	24	724	159	38520	http://www.ebi.ac.uk/QuickGO/GTerm?id=GO:0006954	[]
2	2	developmental process	GO:0032502	6.01e-15	6.66e-13	56.8	5.49	12.23	-2.88385	LRP2|0.4365;TF|1.2823;C3|1.4997;FBN1|0.207;ANPEP|12.0226;ENPEP|21.0863;PSAP|7.656;A2M|7.5858;GAA|14.4544;KRT13|0.278;EFEMP1|0.0904;APOA4|15.2757;SPP1|0.1406;VASN|0.1738;F2|0.1009;CDH1|0.7311;ANXA1|0.2089;APOA1|18.8799;MME|5.2481;ROBO4|23.1206;NAGLU|8.3946;PGK1|6.0256;HSPA8|4.3251;TPI1|15.2757;OLFM4|0.2512;CD248|0.5297;NID1|0.4093;IGFBP2|0.2754;KLK3|4.4875;HEXB|2.729;ANXA4|3.342;FBLN1|0.1067;HEG1|…	73	7255	159	38520	http://www.ebi.ac.uk/QuickGO/GTerm?id=GO:0032502	[]
4	4	response to oxygen-containing compound	GO:1901700	7.46e-15	7.99e-13	24.78	2.21	12.23	-2.88385	C3|1.4997;FBN1|0.207;PSAP|7.656;HP|6.6069;KRT13|0.278;APOA4|15.2757;SPP1|0.1406;CDH1|0.7311;ANXA1|0.2089;HBB|1.6904;CD55|0.2535;FBLN5|0.2249;IGFBP2|0.2754;PRDX2|35.6451;CAT|15.417;SOD1|16.1436;ASS1|2.4889;HBA1|1.6144;PRDX1|3.1623;SERPINF1|3.2509;S100A8|0.2965;PRDX6|6.9183;GPX3|15.1356;S100A9|0.3945;PARK7|5.445;GSTP1|11.8032;FABP1|14.3219;DAG1|3.02;TXN|16.4437;SCGB1A1|0.3532;ELANE|0.4246;FGFR4|6.9…	33	1555	159	38520	http://www.ebi.ac.uk/QuickGO/GTerm?id=GO:1901700	[]
2	2	negative regulation of biological process	GO:0048519	8.66e-15	8.83e-13	50.57	4.85	12.23	-2.88385	ALB|1.2246;C3|1.4997;FBN1|0.207;C4A|0.673;SERPINA1|29.3765;SERPINA3|19.2309;DPP4|4.7424;PSAP|7.656;A2M|7.5858;HP|6.6069;EFEMP1|0.0904;APOA4|15.2757;SPP1|0.1406;VASN|0.1738;F2|0.1009;SERPINA5|0.2109;CDH1|0.7311;ANXA1|0.2089;IGFBP7|0.0655;SERPINC1|3.4674;APOA1|18.8799;ENO1|7.8705;HSPA8|4.3251;OLFM4|0.2512;GAPDH|6.0256;CD55|0.2535;KLK3|4.4875;ANXA4|3.342;FBLN1|0.1067;PRDX2|35.6451;CAT|15.417;SOD1|16…	62	5444	159	38520	http://www.ebi.ac.uk/QuickGO/GTerm?id=GO:0048519	[]
4	4	regulation of response to stress	GO:0080134	8.77e-15	8.83e-13	24.52	2.18	12.23	-2.88385	TF|1.2823;C3|1.4997;C4A|0.673;PSAP|7.656;A2M|7.5858;HP|6.6069;SPP1|0.1406;F2|0.1009;GGT1|5.2;SERPINC1|3.4674;APOA1|18.8799;HSPA8|4.3251;CD55|0.2535;FBLN5|0.2249;SOD1|16.1436;APOH|11.9124;PVRL2|0.0887;PRDX1|3.1623;SERPINF1|3.2509;HSPA1B|4.3652;S100A8|0.2965;S100A9|0.3945;ANXA5|3.6308;PARK7|5.445;GSTP1|11.8032;FABP1|14.3219;HSP90AA1|11.5878;FGG|3.0479;TXN|16.4437;SCGB1A1|0.3532;ELANE|0.4246;MYLK|0.…	33	1564	159	38520	http://www.ebi.ac.uk/QuickGO/GTerm?id=GO:0080134	[]
4	4	response to oxidative stress	GO:0006979	9.11e-15	8.9e-13	18.05	1.52	12.23	-2.88385	PSAP|7.656;HP|6.6069;APOA4|15.2757;ANXA1|0.2089;HBB|1.6904;FBLN5|0.2249;PRDX2|35.6451;CAT|15.417;SOD1|16.1436;HBA1|1.6144;PRDX1|3.1623;IDH1|2.3335;PRDX6|6.9183;GPX3|15.1356;PARK7|5.445;GSTP1|11.8032;FABP1|14.3219;TXN|16.4437;SCGB1A1|0.3532;PLEKHA1|85.5067	20	469	159	38520	http://www.ebi.ac.uk/QuickGO/GTerm?id=GO:0006979	[]
3	3	anatomical structure development	GO:0048856	1.03e-14	9.8e-13	52.2	5.01	12.23	-2.88385	LRP2|0.4365;TF|1.2823;C3|1.4997;FBN1|0.207;ANPEP|12.0226;ENPEP|21.0863;PSAP|7.656;GAA|14.4544;KRT13|0.278;EFEMP1|0.0904;APOA4|15.2757;SPP1|0.1406;VASN|0.1738;F2|0.1009;CDH1|0.7311;ANXA1|0.2089;APOA1|18.8799;MME|5.2481;ROBO4|23.1206;NAGLU|8.3946;PGK1|6.0256;HSPA8|4.3251;OLFM4|0.2512;CD248|0.5297;NID1|0.4093;KLK3|4.4875;HEXB|2.729;ANXA4|3.342;FBLN1|0.1067;HEG1|0.0839;CAT|15.417;SOD1|16.1436;APOH|11…	67	6288	159	38520	http://www.ebi.ac.uk/QuickGO/GTerm?id=GO:0048856	[]
4	4	reactive oxygen species metabolic process	GO:0072593	1.42e-14	1.31e-12	13.82	1.09	12.23	-2.88385	HP|6.6069;APOA4|15.2757;F2|0.1009;HBB|1.6904;FBLN5|0.2249;PRDX2|35.6451;CAT|15.417;SOD1|16.1436;ASS1|2.4889;HBA1|1.6144;PRDX1|3.1623;PRDX6|6.9183;GPX3|15.1356;PARK7|5.445;GSTP1|11.8032;HSP90AA1|11.5878	16	256	159	38520	http://www.ebi.ac.uk/QuickGO/GTerm?id=GO:0072593	[]
5	5	extracellular matrix organization	GO:0030198	1.75e-14	1.57e-12	-12.16	-1.57	12.23	-2.88385	FBN1|0.207;DPP4|4.7424;A2M|7.5858;EFEMP1|0.0904;SPP1|0.1406;CDH1|0.7311;HSPA8|4.3251;NID1|0.4093;FBLN5|0.2249;FBLN1|0.1067;MADCAM1|0.7178;PARK7|5.445;TTR|1.9055;DAG1|3.02;DPT|0.1995;FGG|3.0479;ELANE|0.4246;MMP7|0.0619;FGFR4|6.9823	19	423	159	38520	http://www.ebi.ac.uk/QuickGO/GTerm?id=GO:0030198	[]
4	4	extracellular structure organization	GO:0043062	1.82e-14	1.59e-12	-12.16	-1.57	12.23	-2.88385	FBN1|0.207;DPP4|4.7424;A2M|7.5858;EFEMP1|0.0904;SPP1|0.1406;CDH1|0.7311;HSPA8|4.3251;NID1|0.4093;FBLN5|0.2249;FBLN1|0.1067;MADCAM1|0.7178;PARK7|5.445;TTR|1.9055;DAG1|3.02;DPT|0.1995;FGG|3.0479;ELANE|0.4246;MMP7|0.0619;FGFR4|6.9823	19	424	159	38520	http://www.ebi.ac.uk/QuickGO/GTerm?id=GO:0043062	[]
2	2	single-organism process	GO:0044699	2.15e-14	1.83e-12	113.37	11.28	12.23	-2.88385	ALB|1.2246;LRP2|0.4365;TF|1.2823;CUBN|0.3597;C3|1.4997;PIGR|0.7586;FBN1|0.207;ANPEP|12.0226;C4A|0.673;ENPEP|21.0863;SERPINA1|29.3765;MGAM|7.379;SERPINA3|19.2309;DPP4|4.7424;PSAP|7.656;A2M|7.5858;HP|6.6069;IGHG2|17.378;GAA|14.4544;KRT13|0.278;EFEMP1|0.0904;APOA4|15.2757;SPP1|0.1406;VASN|0.1738;F2|0.1009;GGT1|5.2;SERPINA5|0.2109;CDH1|0.7311;ANXA1|0.2089;IGFBP7|0.0655;SERPINC1|3.4674;APOA1|18.8799;M…	147	25852	159	38520	http://www.ebi.ac.uk/QuickGO/GTerm?id=GO:0044699	[]
3	3	regulation of immune system process	GO:0002682	3.04e-14	2.52e-12	25.29	2.26	12.23	-2.88385	C3|1.4997;PIGR|0.7586;C4A|0.673;DPP4|4.7424;A2M|7.5858;IGHG2|17.378;GGT1|5.2;CDH1|0.7311;ANXA1|0.2089;APOA1|18.8799;OLFM4|0.2512;CD55|0.2535;IGFBP2|0.2754;IGHG1|1.3062;SOD1|16.1436;PVRL2|0.0887;HSPA1B|4.3652;MADCAM1|0.7178;ANXA5|3.6308;P06314|0.1076;FABP1|14.3219;HSP90AA1|11.5878;PNP|7.7983;SCGB1A1|0.3532;ELANE|0.4246;ACE|2.2909;IGHG3|3.281;ACVR1B|0.1294;MYLK|0.6427;P01594|0.0614;FGFR4|6.9823;PLE…	34	1742	159	38520	http://www.ebi.ac.uk/QuickGO/GTerm?id=GO:0002682	[]
3	3	single-organism developmental process	GO:0044767	3.16e-14	2.56e-12	55.02	5.3	12.23	-2.88385	LRP2|0.4365;TF|1.2823;C3|1.4997;FBN1|0.207;ANPEP|12.0226;ENPEP|21.0863;PSAP|7.656;A2M|7.5858;GAA|14.4544;KRT13|0.278;EFEMP1|0.0904;APOA4|15.2757;SPP1|0.1406;VASN|0.1738;F2|0.1009;CDH1|0.7311;ANXA1|0.2089;APOA1|18.8799;MME|5.2481;ROBO4|23.1206;NAGLU|8.3946;PGK1|6.0256;HSPA8|4.3251;TPI1|15.2757;OLFM4|0.2512;CD248|0.5297;NID1|0.4093;IGFBP2|0.2754;KLK3|4.4875;HEXB|2.729;ANXA4|3.342;FBLN1|0.1067;HEG1|…	71	7127	159	38520	http://www.ebi.ac.uk/QuickGO/GTerm?id=GO:0044767	[]
3	3	response to external stimulus	GO:0009605	4.63e-14	3.67e-12	29.72	2.71	12.23	-2.88385	ALB|1.2246;LRP2|0.4365;C3|1.4997;C4A|0.673;A2M|7.5858;HP|6.6069;APOA4|15.2757;SPP1|0.1406;F2|0.1009;GGT1|5.2;SERPINC1|3.4674;APOA1|18.8799;ENO1|7.8705;HSPA8|4.3251;CD55|0.2535;IGFBP2|0.2754;KLK3|4.4875;CAT|15.417;SOD1|16.1436;APOH|11.9124;ASS1|2.4889;SERPINF1|3.2509;S100A8|0.2965;LYZ|0.5445;S100A9|0.3945;ANXA5|3.6308;PARK7|5.445;GSTP1|11.8032;SORD|1.7219;FABP1|14.3219;EPHB4|0.6081;HSP90AA1|11.587…	43	2847	159	38520	http://www.ebi.ac.uk/QuickGO/GTerm?id=GO:0009605	[]
4	4	cell migration	GO:0016477	7.57e-14	5.85e-12	23.73	2.1	12.23	-2.88385	ENPEP|21.0863;DPP4|4.7424;SPP1|0.1406;F2|0.1009;ANXA1|0.2089;APOA1|18.8799;ROBO4|23.1206;OLFM4|0.2512;CD248|0.5297;HEXB|2.729;FBLN1|0.1067;APOH|11.9124;PPIA|7.5858;SERPINF1|3.2509;S100A8|0.2965;ACTN4|10.8643;SH3BGRL3|0.0461;CD177|1.9953;S100A9|0.3945;MADCAM1|0.7178;EPHB4|0.6081;DAG1|3.02;CD63|2.0893;ELANE|0.4246;ACE|2.2909;ACVR1B|0.1294;ARHGDIA|31.3329;MYLK|0.6427;FGFR4|6.9823;CDC42|99.0832;ECM1|…	31	1478	159	38520	http://www.ebi.ac.uk/QuickGO/GTerm?id=GO:0016477	[]
3	3	catabolic process	GO:0009056	9.29e-14	7.01e-12	38.11	3.57	12.23	-2.88385	ANPEP|12.0226;ENPEP|21.0863;MGAM|7.379;HP|6.6069;GAA|14.4544;APOA4|15.2757;GGT1|5.2;APOA1|18.8799;NAGLU|8.3946;PGK1|6.0256;ENO1|7.8705;GLB1|2.5119;TPI1|15.2757;GAPDH|6.0256;HBB|1.6904;GNS|3.8019;HEXB|2.729;PRDX2|35.6451;CAT|15.417;BHMT|13.5519;ALDOA|1.7378;HBA1|1.6144;PRDX1|3.1623;IDH1|2.3335;S100A8|0.2965;PRDX6|6.9183;GPX3|15.1356;PGA3|0.1138;S100A9|0.3945;ANXA5|3.6308;PARK7|5.445;DNASE1|0.1941;…	47	3446	159	38520	http://www.ebi.ac.uk/QuickGO/GTerm?id=GO:0009056	[]
3	3	positive regulation of response to stimulus	GO:0048584	1.44e-13	1.07e-11	32.61	3.01	12.23	-2.88385	TF|1.2823;C3|1.4997;C4A|0.673;PSAP|7.656;A2M|7.5858;IGHG2|17.378;F2|0.1009;APOA1|18.8799;CD55|0.2535;ACPP|5.4954;IGHG1|1.3062;CAT|15.417;SOD1|16.1436;APOH|11.9124;PVRL2|0.0887;HSPA1B|4.3652;S100A8|0.2965;ACTN4|10.8643;S100A9|0.3945;ANXA5|3.6308;P06314|0.1076;PARK7|5.445;FABP1|14.3219;HSP90AA1|11.5878;FGG|3.0479;TXN|16.4437;CD63|2.0893;ELANE|0.4246;SHISA5|0.2965;IGHG3|3.281;ACVR1B|0.1294;MYLK|0.64…	39	2431	159	38520	http://www.ebi.ac.uk/QuickGO/GTerm?id=GO:0048584	[]
4	4	organonitrogen compound metabolic process	GO:1901564	1.67e-13	1.21e-11	38.56	3.62	12.23	-2.88385	CUBN|0.3597;ANPEP|12.0226;ENPEP|21.0863;PSAP|7.656;APOA4|15.2757;GGT1|5.2;APOA1|18.8799;MME|5.2481;ACY1|17.378;NAGLU|8.3946;PGK1|6.0256;ENO1|7.8705;GLB1|2.5119;HSPA8|4.3251;TPI1|15.2757;GAPDH|6.0256;GNS|3.8019;ACPP|5.4954;ARSA|15.8489;HEXB|2.729;ASAH1|4.9204;LDHB|8.9536;CAT|15.417;SOD1|16.1436;CPE|4.4055;BHMT|13.5519;ALDOA|1.7378;ASS1|2.4889;IDH1|2.3335;HSPA1B|4.3652;GSTA2|18.5353;S100A9|0.3945;P…	48	3643	159	38520	http://www.ebi.ac.uk/QuickGO/GTerm?id=GO:1901564	[]
5	5	proteolysis	GO:0006508	3.55e-13	2.51e-11	36.95	3.45	12.23	-2.88385	C3|1.4997;ANPEP|12.0226;C4A|0.673;ENPEP|21.0863;SERPINA1|29.3765;SERPINA3|19.2309;DPP4|4.7424;A2M|7.5858;F2|0.1009;GGT1|5.2;SERPINA5|0.2109;SERPINC1|3.4674;MME|5.2481;ACY1|17.378;CD55|0.2535;KLK3|4.4875;FBLN1|0.1067;APOH|11.9124;CPM|4.1305;CPE|4.4055;PEBP1|6.7298;PROZ|13.0617;DPP7|4.4055;SERPINF1|3.2509;S100A8|0.2965;PGA3|0.1138;S100A9|0.3945;PARK7|5.445;CNDP2|17.0608;SERPINI1|4.4875;FABP1|14.321…	45	3295	159	38520	http://www.ebi.ac.uk/QuickGO/GTerm?id=GO:0006508	[]
4	4	movement of cell or subcellular component	GO:0006928	4.31e-13	2.98e-11	28.76	2.62	12.23	-2.88385	TF|1.2823;ENPEP|21.0863;DPP4|4.7424;SPP1|0.1406;F2|0.1009;ANXA1|0.2089;APOA1|18.8799;ROBO4|23.1206;HSPA8|4.3251;OLFM4|0.2512;CD248|0.5297;HEXB|2.729;FBLN1|0.1067;SOD1|16.1436;APOH|11.9124;PPIA|7.5858;SERPINF1|3.2509;S100A8|0.2965;ACTN4|10.8643;SH3BGRL3|0.0461;CD177|1.9953;S100A9|0.3945;MADCAM1|0.7178;ANXA5|3.6308;SORD|1.7219;EPHB4|0.6081;HSP90AA1|11.5878;DAG1|3.02;TXN|16.4437;CD63|2.0893;ELANE|0.…	38	2392	159	38520	http://www.ebi.ac.uk/QuickGO/GTerm?id=GO:0006928	[]
5	3,4,5	protein activation cascade	GO:0072376	4.63e-13	3.14e-11	9.94	0.69	12.23	-2.88385	C3|1.4997;C4A|0.673;A2M|7.5858;IGHG2|17.378;F2|0.1009;SERPINC1|3.4674;CD55|0.2535;FBLN1|0.1067;IGHG1|1.3062;APOH|11.9124;P06314|0.1076;FGG|3.0479;IGHG3|3.281;P01594|0.0614	14	218	159	38520	http://www.ebi.ac.uk/QuickGO/GTerm?id=GO:0072376	[]
5	5	response to hydrogen peroxide	GO:0042542	9.2e-13	6.11e-11	10.26	0.72	12.23	-2.88385	PSAP|7.656;HP|6.6069;ANXA1|0.2089;HBB|1.6904;CAT|15.417;SOD1|16.1436;HBA1|1.6144;PARK7|5.445;FABP1|14.3219;TXN|16.4437;PLEKHA1|85.5067	11	107	159	38520	http://www.ebi.ac.uk/QuickGO/GTerm?id=GO:0042542	[]
6	6	acute inflammatory response	GO:0002526	1.04e-12	6.78e-11	8.76	0.57	12.23	-2.88385	C3|1.4997;C4A|0.673;SERPINA1|29.3765;SERPINA3|19.2309;A2M|7.5858;HP|6.6069;F2|0.1009;CD55|0.2535;ASS1|2.4889;S100A8|0.2965;GSTP1|11.8032;ELANE|0.4246	12	144	159	38520	http://www.ebi.ac.uk/QuickGO/GTerm?id=GO:0002526	[]
2	2	localization	GO:0051179	2.17e-12	1.38e-10	61.24	5.94	12.23	-2.88385	ALB|1.2246;LRP2|0.4365;TF|1.2823;CUBN|0.3597;C3|1.4997;PIGR|0.7586;FBN1|0.207;C4A|0.673;ENPEP|21.0863;SERPINA1|29.3765;DPP4|4.7424;PSAP|7.656;A2M|7.5858;HP|6.6069;IGHG2|17.378;GAA|14.4544;APOA4|15.2757;SPP1|0.1406;F2|0.1009;SERPINA5|0.2109;CDH1|0.7311;ANXA1|0.2089;APOA1|18.8799;ROBO4|23.1206;HSPA8|4.3251;OLFM4|0.2512;HBB|1.6904;AFM|8.6298;CD248|0.5297;CA1|26.3027;FBLN5|0.2249;HEXB|2.729;ANXA4|3.3…	83	10064	159	38520	http://www.ebi.ac.uk/QuickGO/GTerm?id=GO:0051179	[]
3	3	cell adhesion	GO:0007155	2.6e-12	1.63e-10	-24.25	-2.81	12.23	-2.88385	DPP4|4.7424;APOA4|15.2757;SPP1|0.1406;CDH1|0.7311;ANXA1|0.2089;IGFBP7|0.0655;APOA1|18.8799;OLFM4|0.2512;HBB|1.6904;CD55|0.2535;NID1|0.4093;FBLN5|0.2249;IGFBP2|0.2754;FBLN1|0.1067;SOD1|16.1436;CADM4|0.1117;ASS1|2.4889;MSLN|0.3873;PVRL2|0.0887;S100A8|0.2965;NOV|2.8054;ACTN4|10.8643;S100A9|0.3945;MADCAM1|0.7178;SERPINI1|4.4875;EPHB4|0.6081;DAG1|3.02;DPT|0.1995;FGG|3.0479;PNP|7.7983;SCGB1A1|0.3532;CD…	34	2041	159	38520	http://www.ebi.ac.uk/QuickGO/GTerm?id=GO:0007155	[]
2	2	biological adhesion	GO:0022610	2.81e-12	1.73e-10	-24.25	-2.81	12.23	-2.88385	DPP4|4.7424;APOA4|15.2757;SPP1|0.1406;CDH1|0.7311;ANXA1|0.2089;IGFBP7|0.0655;APOA1|18.8799;OLFM4|0.2512;HBB|1.6904;CD55|0.2535;NID1|0.4093;FBLN5|0.2249;IGFBP2|0.2754;FBLN1|0.1067;SOD1|16.1436;CADM4|0.1117;ASS1|2.4889;MSLN|0.3873;PVRL2|0.0887;S100A8|0.2965;NOV|2.8054;ACTN4|10.8643;S100A9|0.3945;MADCAM1|0.7178;SERPINI1|4.4875;EPHB4|0.6081;DAG1|3.02;DPT|0.1995;FGG|3.0479;PNP|7.7983;SCGB1A1|0.3532;CD…	34	2047	159	38520	http://www.ebi.ac.uk/QuickGO/GTerm?id=GO:0022610	[]
4	4	system development	GO:0048731	2.89e-12	1.75e-10	43.3	4.1	12.23	-2.88385	LRP2|0.4365;TF|1.2823;C3|1.4997;FBN1|0.207;ANPEP|12.0226;ENPEP|21.0863;PSAP|7.656;GAA|14.4544;KRT13|0.278;EFEMP1|0.0904;APOA4|15.2757;SPP1|0.1406;VASN|0.1738;F2|0.1009;CDH1|0.7311;ANXA1|0.2089;APOA1|18.8799;MME|5.2481;ROBO4|23.1206;NAGLU|8.3946;HSPA8|4.3251;CD248|0.5297;NID1|0.4093;KLK3|4.4875;HEXB|2.729;HEG1|0.0839;CAT|15.417;SOD1|16.1436;APOH|11.9124;ACP2|2.5823;CPE|4.4055;ASS1|2.4889;MSLN|0.38…	55	5022	159	38520	http://www.ebi.ac.uk/QuickGO/GTerm?id=GO:0048731	[]
3	3	immune response	GO:0006955	3.78e-12	2.24e-10	26.37	2.37	12.23	-2.88385	C3|1.4997;PIGR|0.7586;C4A|0.673;A2M|7.5858;IGHG2|17.378;APOA4|15.2757;CDH1|0.7311;APOA1|18.8799;OLFM4|0.2512;GAPDH|6.0256;CD55|0.2535;KLK3|4.4875;IGHG1|1.3062;ASS1|2.4889;PVRL2|0.0887;PRDX1|3.1623;LCN2|0.2051;HSPA1B|4.3652;S100A8|0.2965;S100A9|0.3945;MADCAM1|0.7178;P06314|0.1076;PRG4|0.2831;HSP90AA1|11.5878;AHCY|2.6546;PNP|7.7983;TXN|16.4437;ELANE|0.4246;IGHG3|3.281;MMP7|0.0619;P01594|0.0614;FGFR…	35	2191	159	38520	http://www.ebi.ac.uk/QuickGO/GTerm?id=GO:0006955	[]
6	6	cellular response to reactive oxygen species	GO:0034614	3.95e-12	2.3e-10	11.7	0.87	12.23	-2.88385	PSAP|7.656;APOA4|15.2757;ANXA1|0.2089;FBLN5|0.2249;PRDX2|35.6451;SOD1|16.1436;PRDX1|3.1623;PARK7|5.445;FABP1|14.3219;TXN|16.4437;PLEKHA1|85.5067	11	122	159	38520	http://www.ebi.ac.uk/QuickGO/GTerm?id=GO:0034614	[]
2	2	positive regulation of biological process	GO:0048518	7.24e-12	4.15e-10	51.26	4.92	12.23	-2.88385	TF|1.2823;C3|1.4997;C4A|0.673;DPP4|4.7424;PSAP|7.656;A2M|7.5858;HP|6.6069;IGHG2|17.378;APOA4|15.2757;SPP1|0.1406;F2|0.1009;CDH1|0.7311;ANXA1|0.2089;APOA1|18.8799;HSPA8|4.3251;OLFM4|0.2512;HBB|1.6904;CD55|0.2535;CD248|0.5297;NID1|0.4093;IGFBP2|0.2754;ACPP|5.4954;HEXB|2.729;FBLN1|0.1067;HEG1|0.0839;IGHG1|1.3062;CAT|15.417;SOD1|16.1436;APOH|11.9124;PPIA|7.5858;ASS1|2.4889;HBA1|1.6144;PVRL2|0.0887;SE…	66	7022	159	38520	http://www.ebi.ac.uk/QuickGO/GTerm?id=GO:0048518	[]
6	6	regulation of peptidase activity	GO:0052547	7.49e-12	4.22e-10	14.18	1.12	12.23	-2.88385	C3|1.4997;C4A|0.673;SERPINA1|29.3765;SERPINA3|19.2309;A2M|7.5858;SERPINA5|0.2109;SERPINC1|3.4674;FBLN1|0.1067;PEBP1|6.7298;SERPINF1|3.2509;S100A8|0.2965;S100A9|0.3945;PARK7|5.445;SERPINI1|4.4875;FABP1|14.3219;CST6|0.0692;ITIH1|6.9183;SPINK1|0.5012;ECM1|7.9433	19	597	159	38520	http://www.ebi.ac.uk/QuickGO/GTerm?id=GO:0052547	[]
5	5	platelet activation	GO:0030168	9.71e-12	5.38e-10	10.1	0.71	12.23	-2.88385	ALB|1.2246;TF|1.2823;SERPINA1|29.3765;PSAP|7.656;A2M|7.5858;F2|0.1009;APOA1|18.8799;HBB|1.6904;SOD1|16.1436;ALDOA|1.7378;PPIA|7.5858;ACTN4|10.8643;FGG|3.0479;CD63|2.0893	14	273	159	38520	http://www.ebi.ac.uk/QuickGO/GTerm?id=GO:0030168	[]
4	4	multicellular organismal development	GO:0007275	1.08e-11	5.89e-10	45.91	4.37	12.23	-2.88385	LRP2|0.4365;TF|1.2823;C3|1.4997;FBN1|0.207;ANPEP|12.0226;ENPEP|21.0863;PSAP|7.656;GAA|14.4544;KRT13|0.278;EFEMP1|0.0904;APOA4|15.2757;SPP1|0.1406;VASN|0.1738;F2|0.1009;CDH1|0.7311;ANXA1|0.2089;APOA1|18.8799;MME|5.2481;ROBO4|23.1206;NAGLU|8.3946;HSPA8|4.3251;TPI1|15.2757;CD248|0.5297;NID1|0.4093;KLK3|4.4875;HEXB|2.729;FBLN1|0.1067;HEG1|0.0839;CAT|15.417;SOD1|16.1436;APOH|11.9124;ACP2|2.5823;CPE|4.…	58	5689	159	38520	http://www.ebi.ac.uk/QuickGO/GTerm?id=GO:0007275	[]
6	6	negative regulation of proteolysis	GO:0045861	1.37e-11	7.37e-10	13.87	1.09	12.23	-2.88385	C3|1.4997;C4A|0.673;SERPINA1|29.3765;SERPINA3|19.2309;A2M|7.5858;F2|0.1009;SERPINA5|0.2109;SERPINC1|3.4674;CD55|0.2535;PEBP1|6.7298;SERPINF1|3.2509;PARK7|5.445;SERPINI1|4.4875;FABP1|14.3219;CST6|0.0692;ITIH1|6.9183;SPINK1|0.5012;ECM1|7.9433	18	542	159	38520	http://www.ebi.ac.uk/QuickGO/GTerm?id=GO:0045861	[]
3	3	response to abiotic stimulus	GO:0009628	1.67e-11	8.82e-10	20.63	1.78	12.23	-2.88385	LRP2|0.4365;DPP4|4.7424;KRT13|0.278;APOA4|15.2757;VASN|0.1738;F2|0.1009;ANXA1|0.2089;APOA1|18.8799;MME|5.2481;HSPA8|4.3251;IGFBP2|0.2754;CAT|15.417;SOD1|16.1436;SERPINF1|3.2509;HSPA1B|4.3652;ACTN4|10.8643;SORD|1.7219;FABP1|14.3219;HSP90AA1|11.5878;TTR|1.9055;AHCY|2.6546;TXN|16.4437;ELANE|0.4246;ARHGDIA|31.3329;MYLK|0.6427;MMP7|0.0619	26	1269	159	38520	http://www.ebi.ac.uk/QuickGO/GTerm?id=GO:0009628	[]
7	6,7	negative regulation of peptidase activity	GO:0010466	1.99e-11	1.04e-09	12.28	0.93	12.23	-2.88385	C3|1.4997;C4A|0.673;SERPINA1|29.3765;SERPINA3|19.2309;A2M|7.5858;SERPINA5|0.2109;SERPINC1|3.4674;PEBP1|6.7298;SERPINF1|3.2509;PARK7|5.445;SERPINI1|4.4875;FABP1|14.3219;CST6|0.0692;ITIH1|6.9183;SPINK1|0.5012;ECM1|7.9433	16	412	159	38520	http://www.ebi.ac.uk/QuickGO/GTerm?id=GO:0010466	[]
6	5,6	negative regulation of hydrolase activity	GO:0051346	2.49e-11	1.27e-09	14.24	1.13	12.23	-2.88385	C3|1.4997;C4A|0.673;SERPINA1|29.3765;SERPINA3|19.2309;A2M|7.5858;SERPINA5|0.2109;ANXA1|0.2089;SERPINC1|3.4674;APOA1|18.8799;PEBP1|6.7298;SERPINF1|3.2509;PARK7|5.445;SERPINI1|4.4875;FABP1|14.3219;CST6|0.0692;ITIH1|6.9183;SPINK1|0.5012;ECM1|7.9433	18	562	159	38520	http://www.ebi.ac.uk/QuickGO/GTerm?id=GO:0051346	[]
5	5	response to metal ion	GO:0010038	2.98e-11	1.5e-09	7.34	0.42	12.23	-2.88385	C3|1.4997;CDH1|0.7311;IGFBP2|0.2754;CAT|15.417;SOD1|16.1436;ASS1|2.4889;SERPINF1|3.2509;S100A8|0.2965;S100A9|0.3945;ANXA5|3.6308;PARK7|5.445;SORD|1.7219;FGG|3.0479;CPNE3|1.6293	14	297	159	38520	http://www.ebi.ac.uk/QuickGO/GTerm?id=GO:0010038	[]
6	5,6	regulation of inflammatory response	GO:0050727	3.41e-11	1.69e-09	8.43	0.53	12.23	-2.88385	C3|1.4997;C4A|0.673;A2M|7.5858;GGT1|5.2;SERPINC1|3.4674;APOA1|18.8799;CD55|0.2535;SERPINF1|3.2509;S100A8|0.2965;S100A9|0.3945;PARK7|5.445;GSTP1|11.8032;SCGB1A1|0.3532;ELANE|0.4246	14	300	159	38520	http://www.ebi.ac.uk/QuickGO/GTerm?id=GO:0050727	[]
4	4	cell death	GO:0008219	4.13e-11	2.02e-09	28.2	2.56	12.23	-2.88385	ALB|1.2246;PSAP|7.656;HP|6.6069;CDH1|0.7311;ANXA1|0.2089;OLFM4|0.2512;GAPDH|6.0256;HBB|1.6904;CD248|0.5297;ANXA4|3.342;PRDX2|35.6451;CAT|15.417;SOD1|16.1436;APOH|11.9124;ACP2|2.5823;HBA1|1.6144;LCN2|0.2051;SERPINF1|3.2509;HSPA1B|4.3652;S100A8|0.2965;NOV|2.8054;ACTN4|10.8643;S100A9|0.3945;ANXA5|3.6308;PARK7|5.445;GSTP1|11.8032;DNASE1|0.1941;FABP1|14.3219;GLO1|3.1333;FGG|3.0479;TXN|16.4437;SHISA5|0…	36	2519	159	38520	http://www.ebi.ac.uk/QuickGO/GTerm?id=GO:0008219	[]
3	3	death	GO:0016265	4.31e-11	2.08e-09	28.2	2.56	12.23	-2.88385	ALB|1.2246;PSAP|7.656;HP|6.6069;CDH1|0.7311;ANXA1|0.2089;OLFM4|0.2512;GAPDH|6.0256;HBB|1.6904;CD248|0.5297;ANXA4|3.342;PRDX2|35.6451;CAT|15.417;SOD1|16.1436;APOH|11.9124;ACP2|2.5823;HBA1|1.6144;LCN2|0.2051;SERPINF1|3.2509;HSPA1B|4.3652;S100A8|0.2965;NOV|2.8054;ACTN4|10.8643;S100A9|0.3945;ANXA5|3.6308;PARK7|5.445;GSTP1|11.8032;DNASE1|0.1941;FABP1|14.3219;GLO1|3.1333;FGG|3.0479;TXN|16.4437;SHISA5|0…	36	2523	159	38520	http://www.ebi.ac.uk/QuickGO/GTerm?id=GO:0016265	[]
3	3	positive regulation of cellular process	GO:0048522	5.26e-11	2.49e-09	40.91	3.86	12.23	-2.88385	TF|1.2823;C3|1.4997;C4A|0.673;DPP4|4.7424;PSAP|7.656;HP|6.6069;APOA4|15.2757;SPP1|0.1406;F2|0.1009;CDH1|0.7311;ANXA1|0.2089;APOA1|18.8799;HSPA8|4.3251;OLFM4|0.2512;HBB|1.6904;CD55|0.2535;CD248|0.5297;NID1|0.4093;IGFBP2|0.2754;ACPP|5.4954;HEXB|2.729;FBLN1|0.1067;CAT|15.417;SOD1|16.1436;PPIA|7.5858;ASS1|2.4889;HBA1|1.6144;PVRL2|0.0887;SERPINF1|3.2509;HSPA1B|4.3652;S100A8|0.2965;ACTN4|10.8643;S100A9…	56	5573	159	38520	http://www.ebi.ac.uk/QuickGO/GTerm?id=GO:0048522	[]
4	4	cellular response to chemical stimulus	GO:0070887	8.46e-11	3.96e-09	34.55	3.21	12.23	-2.88385	FBN1|0.207;PSAP|7.656;HP|6.6069;KRT13|0.278;APOA4|15.2757;SPP1|0.1406;VASN|0.1738;GGT1|5.2;CDH1|0.7311;ANXA1|0.2089;APOA1|18.8799;MME|5.2481;ACY1|17.378;GAPDH|6.0256;CD55|0.2535;FBLN5|0.2249;IGFBP2|0.2754;PRDX2|35.6451;CAT|15.417;SOD1|16.1436;ASS1|2.4889;PRDX1|3.1623;SERPINF1|3.2509;HSPA1B|4.3652;GSTA2|18.5353;S100A8|0.2965;S100A9|0.3945;PARK7|5.445;CNDP2|17.0608;GSTP1|11.8032;FABP1|14.3219;AHCY|…	41	3280	159	38520	http://www.ebi.ac.uk/QuickGO/GTerm?id=GO:0070887	[]
3	3	regulation of multicellular organismal process	GO:0051239	8.66e-11	4e-09	31.1	2.85	12.23	-2.88385	TF|1.2823;C3|1.4997;GAA|14.4544;EFEMP1|0.0904;APOA4|15.2757;SPP1|0.1406;VASN|0.1738;F2|0.1009;ANXA1|0.2089;SERPINC1|3.4674;APOA1|18.8799;KLK3|4.4875;ACPP|5.4954;ANXA4|3.342;FBLN1|0.1067;HEG1|0.0839;SOD1|16.1436;APOH|11.9124;SERPINF1|3.2509;HSPA1B|4.3652;SH3BGRL3|0.0461;S100A9|0.3945;ANXA5|3.6308;PARK7|5.445;GSTP1|11.8032;PRG4|0.2831;DAG1|3.02;FGG|3.0479;PNP|7.7983;SCGB1A1|0.3532;ELANE|0.4246;ACE|…	37	2722	159	38520	http://www.ebi.ac.uk/QuickGO/GTerm?id=GO:0051239	[]
4	4	regulation of cellular component organization	GO:0051128	1.11e-10	5.05e-09	28.12	2.55	12.23	-2.88385	C3|1.4997;C4A|0.673;DPP4|4.7424;SPP1|0.1406;VASN|0.1738;F2|0.1009;ANXA1|0.2089;IGFBP7|0.0655;APOA1|18.8799;ENO1|7.8705;HSPA8|4.3251;OLFM4|0.2512;FBLN5|0.2249;IGFBP2|0.2754;HEXB|2.729;FBLN1|0.1067;ALDOA|1.7378;SERPINF1|3.2509;HSPA1B|4.3652;S100A8|0.2965;NOV|2.8054;ACTN4|10.8643;SH3BGRL3|0.0461;S100A9|0.3945;ANXA5|3.6308;PARK7|5.445;FABP1|14.3219;DAG1|3.02;FGG|3.0479;CD63|2.0893;ACE|2.2909;ACVR1B|0…	37	2746	159	38520	http://www.ebi.ac.uk/QuickGO/GTerm?id=GO:0051128	[]
8	7,8	negative regulation of endopeptidase activity	GO:0010951	1.15e-10	5.16e-09	11.38	0.84	12.23	-2.88385	C3|1.4997;C4A|0.673;SERPINA1|29.3765;SERPINA3|19.2309;A2M|7.5858;SERPINA5|0.2109;SERPINC1|3.4674;PEBP1|6.7298;SERPINF1|3.2509;PARK7|5.445;SERPINI1|4.4875;FABP1|14.3219;CST6|0.0692;ITIH1|6.9183;SPINK1|0.5012	15	394	159	38520	http://www.ebi.ac.uk/QuickGO/GTerm?id=GO:0010951	[]
5	5	negative regulation of protein metabolic process	GO:0051248	1.33e-10	5.9e-09	19.28	1.65	12.23	-2.88385	C3|1.4997;C4A|0.673;SERPINA1|29.3765;SERPINA3|19.2309;A2M|7.5858;APOA4|15.2757;F2|0.1009;SERPINA5|0.2109;SERPINC1|3.4674;GAPDH|6.0256;CD55|0.2535;FBLN1|0.1067;PEBP1|6.7298;SERPINF1|3.2509;PARK7|5.445;GSTP1|11.8032;SERPINI1|4.4875;PRG4|0.2831;FABP1|14.3219;CST6|0.0692;DAG1|3.02;ITIH1|6.9183;SPINK1|0.5012;ELANE|0.4246;ECM1|7.9433	25	1288	159	38520	http://www.ebi.ac.uk/QuickGO/GTerm?id=GO:0051248	[]
5	4,5	negative regulation of catalytic activity	GO:0043086	1.52e-10	6.65e-09	17.66	1.48	12.23	-2.88385	C3|1.4997;C4A|0.673;SERPINA1|29.3765;SERPINA3|19.2309;A2M|7.5858;HP|6.6069;SERPINA5|0.2109;ANXA1|0.2089;SERPINC1|3.4674;APOA1|18.8799;ANXA4|3.342;PEBP1|6.7298;SERPINF1|3.2509;ANXA5|3.6308;PARK7|5.445;GSTP1|11.8032;SERPINI1|4.4875;FABP1|14.3219;CST6|0.0692;ITIH1|6.9183;SCGB1A1|0.3532;SPINK1|0.5012;ECM1|7.9433	23	1088	159	38520	http://www.ebi.ac.uk/QuickGO/GTerm?id=GO:0043086	[]
4	4	regulation of response to external stimulus	GO:0032101	1.86e-10	8.01e-09	13.75	1.08	12.23	-2.88385	C3|1.4997;C4A|0.673;A2M|7.5858;SPP1|0.1406;F2|0.1009;GGT1|5.2;SERPINC1|3.4674;APOA1|18.8799;CD55|0.2535;APOH|11.9124;SERPINF1|3.2509;S100A8|0.2965;S100A9|0.3945;ANXA5|3.6308;PARK7|5.445;GSTP1|11.8032;FABP1|14.3219;FGG|3.0479;SCGB1A1|0.3532;ELANE|0.4246;MYLK|0.6427	21	903	159	38520	http://www.ebi.ac.uk/QuickGO/GTerm?id=GO:0032101	[]
7	7	regulation of endopeptidase activity	GO:0052548	2.2e-10	9.38e-09	12.31	0.93	12.23	-2.88385	C3|1.4997;C4A|0.673;SERPINA1|29.3765;SERPINA3|19.2309;A2M|7.5858;SERPINA5|0.2109;SERPINC1|3.4674;PEBP1|6.7298;SERPINF1|3.2509;S100A8|0.2965;S100A9|0.3945;PARK7|5.445;SERPINI1|4.4875;FABP1|14.3219;CST6|0.0692;ITIH1|6.9183;SPINK1|0.5012	17	562	159	38520	http://www.ebi.ac.uk/QuickGO/GTerm?id=GO:0052548	[]
2	2	multi-organism process	GO:0051704	3.87e-10	1.62e-08	24.74	2.2	12.23	-2.88385	ALB|1.2246;ANPEP|12.0226;DPP4|4.7424;HP|6.6069;SPP1|0.1406;GGT1|5.2;SERPINA5|0.2109;ENO1|7.8705;HSPA8|4.3251;CD55|0.2535;IGFBP2|0.2754;KLK3|4.4875;HEXB|2.729;FBLN1|0.1067;SOD1|16.1436;PPIA|7.5858;ASS1|2.4889;PVRL2|0.0887;HSPA1B|4.3652;S100A8|0.2965;LYZ|0.5445;S100A9|0.3945;ANXA5|3.6308;PARK7|5.445;GSTP1|11.8032;FABP1|14.3219;DAG1|3.02;SCGB1A1|0.3532;SPINK1|0.5012;ELANE|0.4246;ACE|2.2909;ACVR1B|0.…	35	2595	159	38520	http://www.ebi.ac.uk/QuickGO/GTerm?id=GO:0051704	[]
4	4	protein metabolic process	GO:0019538	3.9e-10	1.62e-08	64.56	6.28	12.23	-2.88385	ALB|1.2246;LRP2|0.4365;TF|1.2823;CUBN|0.3597;C3|1.4997;ANPEP|12.0226;C4A|0.673;ENPEP|21.0863;SERPINA1|29.3765;SERPINA3|19.2309;DPP4|4.7424;PSAP|7.656;A2M|7.5858;IGHG2|17.378;EFEMP1|0.0904;APOA4|15.2757;F2|0.1009;GGT1|5.2;SERPINA5|0.2109;ANXA1|0.2089;SERPINC1|3.4674;APOA1|18.8799;MME|5.2481;ACY1|17.378;GLB1|2.5119;HSPA8|4.3251;GAPDH|6.0256;CD55|0.2535;IGFBP2|0.2754;KLK3|4.4875;ARSA|15.8489;HEXB|2.…	81	10637	159	38520	http://www.ebi.ac.uk/QuickGO/GTerm?id=GO:0019538	[]
4	4	homeostatic process	GO:0042592	4.58e-10	1.88e-08	20.3	1.75	12.23	-2.88385	ALB|1.2246;TF|1.2823;CUBN|0.3597;PIGR|0.7586;SERPINA3|19.2309;GAA|14.4544;APOA4|15.2757;SPP1|0.1406;F2|0.1009;ANXA1|0.2089;APOA1|18.8799;CD55|0.2535;HEXB|2.729;SOD1|16.1436;ALDOA|1.7378;PRDX1|3.1623;LCN2|0.2051;SERPINF1|3.2509;S100A8|0.2965;SH3BGRL3|0.0461;LYZ|0.5445;S100A9|0.3945;GSTP1|11.8032;TXN|16.4437;CKB|3.0761;ELANE|0.4246;IGHG3|3.281;ACVR1B|0.1294;FGFR4|6.9823	29	1834	159	38520	http://www.ebi.ac.uk/QuickGO/GTerm?id=GO:0042592	[]
5	5	cellular response to oxidative stress	GO:0034599	4.76e-10	1.93e-08	12.52	0.95	12.23	-2.88385	PSAP|7.656;HP|6.6069;APOA4|15.2757;ANXA1|0.2089;FBLN5|0.2249;PRDX2|35.6451;SOD1|16.1436;PRDX1|3.1623;PARK7|5.445;FABP1|14.3219;TXN|16.4437;PLEKHA1|85.5067	12	243	159	38520	http://www.ebi.ac.uk/QuickGO/GTerm?id=GO:0034599	[]
5	5	regulation of protein metabolic process	GO:0051246	4.86e-10	1.95e-08	33.1	3.06	12.23	-2.88385	TF|1.2823;C3|1.4997;ANPEP|12.0226;C4A|0.673;ENPEP|21.0863;SERPINA1|29.3765;SERPINA3|19.2309;PSAP|7.656;A2M|7.5858;APOA4|15.2757;F2|0.1009;SERPINA5|0.2109;SERPINC1|3.4674;APOA1|18.8799;MME|5.2481;GAPDH|6.0256;CD55|0.2535;FBLN1|0.1067;SOD1|16.1436;PEBP1|6.7298;PRDX1|3.1623;SERPINF1|3.2509;S100A8|0.2965;S100A9|0.3945;PARK7|5.445;GSTP1|11.8032;SERPINI1|4.4875;PRG4|0.2831;FABP1|14.3219;CST6|0.0692;DAG…	41	3475	159	38520	http://www.ebi.ac.uk/QuickGO/GTerm?id=GO:0051246	[]
4	4	regulation of cell adhesion	GO:0030155	5.46e-10	2.16e-08	14.67	1.17	12.23	-2.88385	DPP4|4.7424;SPP1|0.1406;CDH1|0.7311;APOA1|18.8799;OLFM4|0.2512;CD55|0.2535;NID1|0.4093;IGFBP2|0.2754;FBLN1|0.1067;SOD1|16.1436;ASS1|2.4889;ACTN4|10.8643;SERPINI1|4.4875;FGG|3.0479;PNP|7.7983;SCGB1A1|0.3532;ARHGDIA|31.3329;CDC42|99.0832	18	681	159	38520	http://www.ebi.ac.uk/QuickGO/GTerm?id=GO:0030155	[]
5	4,5	cellular modified amino acid metabolic process	GO:0006575	6.02e-10	2.35e-08	10.48	0.74	12.23	-2.88385	GGT1|5.2;SOD1|16.1436;BHMT|13.5519;ASS1|2.4889;IDH1|2.3335;GSTA2|18.5353;PARK7|5.445;CNDP2|17.0608;GSTP1|11.8032;AHCY|2.6546;GLO1|3.1333;GGACT|8.7902;CKB|3.0761	13	308	159	38520	http://www.ebi.ac.uk/QuickGO/GTerm?id=GO:0006575	[]
4	4	organic acid metabolic process	GO:0006082	6.4e-10	2.47e-08	21.1	1.83	12.23	-2.88385	ALB|1.2246;C3|1.4997;APOA4|15.2757;GGT1|5.2;ANXA1|0.2089;APOA1|18.8799;ACY1|17.378;PGK1|6.0256;ENO1|7.8705;GLB1|2.5119;TPI1|15.2757;GAPDH|6.0256;GNS|3.8019;HEXB|2.729;LDHB|8.9536;BHMT|13.5519;ALDOA|1.7378;ASS1|2.4889;IDH1|2.3335;PARK7|5.445;CNDP2|17.0608;FABP1|14.3219;AHCY|2.6546;PNP|7.7983;CKB|3.0761;FAH|5.445;BPNT1|12.2462;FGFR4|6.9823	28	1739	159	38520	http://www.ebi.ac.uk/QuickGO/GTerm?id=GO:0006082	[]
5	5	organonitrogen compound catabolic process	GO:1901565	7.17e-10	2.74e-08	11.25	0.82	12.23	-2.88385	ANPEP|12.0226;ENPEP|21.0863;GGT1|5.2;NAGLU|8.3946;GLB1|2.5119;GNS|3.8019;HEXB|2.729;CAT|15.417;AHCY|2.6546;PNP|7.7983;FUCA1|12.942;GGACT|8.7902;ACE|2.2909;FAH|5.445;GUSB|0.7311	15	450	159	38520	http://www.ebi.ac.uk/QuickGO/GTerm?id=GO:1901565	[]
3	3	negative regulation of response to stimulus	GO:0048585	7.96e-10	2.99e-08	22.14	1.94	12.23	-2.88385	FBN1|0.207;PSAP|7.656;A2M|7.5858;HP|6.6069;SPP1|0.1406;VASN|0.1738;F2|0.1009;SERPINC1|3.4674;APOA1|18.8799;OLFM4|0.2512;CD55|0.2535;FBLN1|0.1067;APOH|11.9124;SERPINF1|3.2509;HSPA1B|4.3652;ANXA5|3.6308;PARK7|5.445;GSTP1|11.8032;DAG1|3.02;FGG|3.0479;TXN|16.4437;SPINK1|0.5012;ELANE|0.4246;PLEKHA1|85.5067;CDC42|99.0832;ECM1|7.9433	26	1519	159	38520	http://www.ebi.ac.uk/QuickGO/GTerm?id=GO:0048585	[]
4	4	cell activation	GO:0001775	8.01e-10	2.99e-08	17	1.41	12.23	-2.88385	ALB|1.2246;TF|1.2823;SERPINA1|29.3765;DPP4|4.7424;PSAP|7.656;A2M|7.5858;F2|0.1009;ANXA1|0.2089;APOA1|18.8799;HBB|1.6904;CD55|0.2535;IGFBP2|0.2754;SOD1|16.1436;ALDOA|1.7378;PPIA|7.5858;PVRL2|0.0887;ACTN4|10.8643;FGG|3.0479;PNP|7.7983;SCGB1A1|0.3532;CD63|2.0893;CDC42|99.0832	22	1081	159	38520	http://www.ebi.ac.uk/QuickGO/GTerm?id=GO:0001775	[]
3	3	negative regulation of metabolic process	GO:0009892	9.73e-10	3.58e-08	31.62	2.91	12.23	-2.88385	C3|1.4997;C4A|0.673;SERPINA1|29.3765;SERPINA3|19.2309;A2M|7.5858;HP|6.6069;APOA4|15.2757;F2|0.1009;SERPINA5|0.2109;ANXA1|0.2089;SERPINC1|3.4674;APOA1|18.8799;ENO1|7.8705;HSPA8|4.3251;GAPDH|6.0256;CD55|0.2535;ANXA4|3.342;FBLN1|0.1067;CAT|15.417;SOD1|16.1436;PEBP1|6.7298;SERPINF1|3.2509;ANXA5|3.6308;PARK7|5.445;GSTP1|11.8032;SERPINI1|4.4875;PRG4|0.2831;FABP1|14.3219;CST6|0.0692;DAG1|3.02;ITIH1|6.91…	38	3113	159	38520	http://www.ebi.ac.uk/QuickGO/GTerm?id=GO:0009892	[]
5	5	vesicle-mediated transport	GO:0016192	9.8e-10	3.58e-08	21.86	1.91	12.23	-2.88385	ALB|1.2246;LRP2|0.4365;TF|1.2823;CUBN|0.3597;C3|1.4997;PIGR|0.7586;C4A|0.673;SERPINA1|29.3765;PSAP|7.656;A2M|7.5858;HP|6.6069;IGHG2|17.378;ANXA1|0.2089;APOA1|18.8799;HSPA8|4.3251;OLFM4|0.2512;HBB|1.6904;IGHG1|1.3062;SOD1|16.1436;ALDOA|1.7378;PPIA|7.5858;HBA1|1.6144;ACTN4|10.8643;P06314|0.1076;PRG4|0.2831;HSP90AA1|11.5878;FGG|3.0479;SPINK1|0.5012;CD63|2.0893;ELANE|0.4246;IGHG3|3.281;CPNE3|1.6293;P…	34	2550	159	38520	http://www.ebi.ac.uk/QuickGO/GTerm?id=GO:0016192	[]
6	4,5,6	blood coagulation, fibrin clot formation	GO:0072378	1.24e-09	4.48e-08	4.95	0.18	12.23	-2.88385	A2M|7.5858;F2|0.1009;SERPINC1|3.4674;FBLN1|0.1067;APOH|11.9124;FGG|3.0479	6	27	159	38520	http://www.ebi.ac.uk/QuickGO/GTerm?id=GO:0072378	[]
4	4	negative regulation of molecular function	GO:0044092	1.28e-09	4.57e-08	18.85	1.6	12.23	-2.88385	C3|1.4997;C4A|0.673;SERPINA1|29.3765;SERPINA3|19.2309;A2M|7.5858;HP|6.6069;SERPINA5|0.2109;ANXA1|0.2089;SERPINC1|3.4674;APOA1|18.8799;ANXA4|3.342;CAT|15.417;PEBP1|6.7298;SERPINF1|3.2509;ANXA5|3.6308;PARK7|5.445;GSTP1|11.8032;SERPINI1|4.4875;FABP1|14.3219;CST6|0.0692;ITIH1|6.9183;SCGB1A1|0.3532;SPINK1|0.5012;ECM1|7.9433	24	1325	159	38520	http://www.ebi.ac.uk/QuickGO/GTerm?id=GO:0044092	[]
5	5	regulation of defense response	GO:0031347	1.37e-09	4.84e-08	12.03	0.9	12.23	-2.88385	C3|1.4997;C4A|0.673;A2M|7.5858;GGT1|5.2;SERPINC1|3.4674;APOA1|18.8799;CD55|0.2535;PVRL2|0.0887;SERPINF1|3.2509;HSPA1B|4.3652;S100A8|0.2965;S100A9|0.3945;ANXA5|3.6308;PARK7|5.445;GSTP1|11.8032;FABP1|14.3219;SCGB1A1|0.3532;ELANE|0.4246;MYLK|0.6427	19	814	159	38520	http://www.ebi.ac.uk/QuickGO/GTerm?id=GO:0031347	[]
4	3,4	single organism cell adhesion	GO:0098602	1.4e-09	4.89e-08	-4.3	-0.77	12.23	-2.88385	DPP4|4.7424;APOA4|15.2757;CDH1|0.7311;ANXA1|0.2089;APOA1|18.8799;OLFM4|0.2512;HBB|1.6904;CD55|0.2535;IGFBP2|0.2754;FBLN1|0.1067;SOD1|16.1436;ASS1|2.4889;S100A8|0.2965;ACTN4|10.8643;S100A9|0.3945;MADCAM1|0.7178;FGG|3.0479;PNP|7.7983;SCGB1A1|0.3532;CDC42|99.0832	20	911	159	38520	http://www.ebi.ac.uk/QuickGO/GTerm?id=GO:0098602	[]
4	4	negative regulation of response to wounding	GO:1903035	1.53e-09	5.27e-08	7.74	0.46	12.23	-2.88385	SPP1|0.1406;F2|0.1009;SERPINC1|3.4674;APOA1|18.8799;APOH|11.9124;SERPINF1|3.2509;ANXA5|3.6308;GSTP1|11.8032;FGG|3.0479;ELANE|0.4246	10	161	159	38520	http://www.ebi.ac.uk/QuickGO/GTerm?id=GO:1903035	[]
4	4	sulfur compound metabolic process	GO:0006790	1.54e-09	5.27e-08	12.38	0.94	12.23	-2.88385	GGT1|5.2;GLB1|2.5119;GNS|3.8019;ACPP|5.4954;HEXB|2.729;SOD1|16.1436;BHMT|13.5519;IDH1|2.3335;GSTA2|18.5353;CNDP2|17.0608;GSTP1|11.8032;AHCY|2.6546;GLO1|3.1333;TXN|16.4437;BPNT1|12.2462	15	476	159	38520	http://www.ebi.ac.uk/QuickGO/GTerm?id=GO:0006790	[]
4	4	cytokine production	GO:0001816	1.69e-09	5.72e-08	-6.52	-1	12.23	-2.88385	C3|1.4997;ANXA1|0.2089;APOA1|18.8799;CD55|0.2535;ANXA4|3.342;FBLN1|0.1067;HEG1|0.0839;SOD1|16.1436;HSPA1B|4.3652;S100A8|0.2965;S100A9|0.3945;PARK7|5.445;GSTP1|11.8032;PRG4|0.2831;PNP|7.7983;SCGB1A1|0.3532;ELANE|0.4246	17	643	159	38520	http://www.ebi.ac.uk/QuickGO/GTerm?id=GO:0001816	[]
3	3	anatomical structure morphogenesis	GO:0009653	2.04e-09	6.85e-08	33.15	3.06	12.23	-2.88385	C3|1.4997;FBN1|0.207;ANPEP|12.0226;ENPEP|21.0863;GAA|14.4544;KRT13|0.278;EFEMP1|0.0904;SPP1|0.1406;VASN|0.1738;F2|0.1009;APOA1|18.8799;ROBO4|23.1206;NAGLU|8.3946;HSPA8|4.3251;OLFM4|0.2512;CD248|0.5297;KLK3|4.4875;HEXB|2.729;FBLN1|0.1067;HEG1|0.0839;SOD1|16.1436;APOH|11.9124;CPM|4.1305;CPE|4.4055;ALDOA|1.7378;PVRL2|0.0887;SERPINF1|3.2509;ACTN4|10.8643;EPHB4|0.6081;HSP90AA1|11.5878;CST6|0.0692;DAG1…	38	3197	159	38520	http://www.ebi.ac.uk/QuickGO/GTerm?id=GO:0009653	[]
5	5	oxoacid metabolic process	GO:0043436	2.08e-09	6.91e-08	20.21	1.74	12.23	-2.88385	ALB|1.2246;C3|1.4997;APOA4|15.2757;GGT1|5.2;ANXA1|0.2089;APOA1|18.8799;ACY1|17.378;PGK1|6.0256;ENO1|7.8705;GLB1|2.5119;TPI1|15.2757;GAPDH|6.0256;GNS|3.8019;HEXB|2.729;LDHB|8.9536;BHMT|13.5519;ALDOA|1.7378;ASS1|2.4889;IDH1|2.3335;PARK7|5.445;CNDP2|17.0608;FABP1|14.3219;AHCY|2.6546;CKB|3.0761;FAH|5.445;BPNT1|12.2462;FGFR4|6.9823	27	1711	159	38520	http://www.ebi.ac.uk/QuickGO/GTerm?id=GO:0043436	[]
3	3	cellular response to stimulus	GO:0051716	2.15e-09	7.06e-08	62.59	6.08	12.23	-2.88385	ALB|1.2246;LRP2|0.4365;TF|1.2823;C3|1.4997;PIGR|0.7586;FBN1|0.207;PSAP|7.656;A2M|7.5858;HP|6.6069;IGHG2|17.378;KRT13|0.278;EFEMP1|0.0904;APOA4|15.2757;SPP1|0.1406;VASN|0.1738;F2|0.1009;GGT1|5.2;CDH1|0.7311;ANXA1|0.2089;APOA1|18.8799;MME|5.2481;ACY1|17.378;HSPA8|4.3251;OLFM4|0.2512;GAPDH|6.0256;CD55|0.2535;FBLN5|0.2249;IGFBP2|0.2754;KLK3|4.4875;ACPP|5.4954;ANXA4|3.342;FBLN1|0.1067;PRDX2|35.6451;IG…	83	11418	159	38520	http://www.ebi.ac.uk/QuickGO/GTerm?id=GO:0051716	[]
3	3	regulation of locomotion	GO:0040012	2.19e-09	7.14e-08	13.45	1.05	12.23	-2.88385	TF|1.2823;ROBO4|23.1206;OLFM4|0.2512;FBLN1|0.1067;APOH|11.9124;PVRL2|0.0887;SERPINF1|3.2509;ACTN4|10.8643;SH3BGRL3|0.0461;MADCAM1|0.7178;ANXA5|3.6308;DAG1|3.02;ELANE|0.4246;ACE|2.2909;ACVR1B|0.1294;ARHGDIA|31.3329;MYLK|0.6427;ECM1|7.9433	18	744	159	38520	http://www.ebi.ac.uk/QuickGO/GTerm?id=GO:0040012	[]
6	6	protein processing	GO:0016485	2.21e-09	7.14e-08	11.11	0.81	12.23	-2.88385	C3|1.4997;ANPEP|12.0226;C4A|0.673;ENPEP|21.0863;A2M|7.5858;GGT1|5.2;MME|5.2481;CD55|0.2535;APOH|11.9124;CPE|4.4055;S100A8|0.2965;S100A9|0.3945;FGG|3.0479;ACE|2.2909;KLK6|0.0113	15	489	159	38520	http://www.ebi.ac.uk/QuickGO/GTerm?id=GO:0016485	[]
5	4,5	organ development	GO:0048513	2.29e-09	7.32e-08	28.54	2.59	12.23	-2.88385	LRP2|0.4365;TF|1.2823;FBN1|0.207;ENPEP|21.0863;PSAP|7.656;GAA|14.4544;KRT13|0.278;EFEMP1|0.0904;SPP1|0.1406;VASN|0.1738;CDH1|0.7311;ANXA1|0.2089;APOA1|18.8799;MME|5.2481;NAGLU|8.3946;CD248|0.5297;NID1|0.4093;HEG1|0.0839;CAT|15.417;SOD1|16.1436;APOH|11.9124;CPE|4.4055;ASS1|2.4889;MSLN|0.3873;IDH1|2.3335;SERPINF1|3.2509;MADCAM1|0.7178;PRG4|0.2831;EPHB4|0.6081;DAG1|3.02;GLO1|3.1333;PNP|7.7983;CKB|3.…	39	3359	159	38520	http://www.ebi.ac.uk/QuickGO/GTerm?id=GO:0048513	[]
3	3	single-organism cellular process	GO:0044763	2.35e-09	7.44e-08	98.7	9.77	12.23	-2.88385	ALB|1.2246;LRP2|0.4365;TF|1.2823;CUBN|0.3597;C3|1.4997;PIGR|0.7586;FBN1|0.207;ANPEP|12.0226;ENPEP|21.0863;SERPINA1|29.3765;MGAM|7.379;DPP4|4.7424;PSAP|7.656;A2M|7.5858;HP|6.6069;IGHG2|17.378;GAA|14.4544;EFEMP1|0.0904;APOA4|15.2757;SPP1|0.1406;VASN|0.1738;F2|0.1009;GGT1|5.2;SERPINA5|0.2109;CDH1|0.7311;ANXA1|0.2089;IGFBP7|0.0655;APOA1|18.8799;MME|5.2481;ROBO4|23.1206;ACY1|17.378;NAGLU|8.3946;PGK1|6…	129	22761	159	38520	http://www.ebi.ac.uk/QuickGO/GTerm?id=GO:0044763	[]
3	3	cell proliferation	GO:0008283	3.49e-09	1.09e-07	-24.97	-2.88	12.23	-2.88385	LRP2|0.4365;ENPEP|21.0863;DPP4|4.7424;F2|0.1009;CDH1|0.7311;ANXA1|0.2089;IGFBP7|0.0655;APOA1|18.8799;CD55|0.2535;CD248|0.5297;IGFBP2|0.2754;FBLN1|0.1067;APOH|11.9124;PRDX1|3.1623;SERPINF1|3.2509;GSTP1|11.8032;PRG4|0.2831;FABP1|14.3219;REG1A|0.0441;DPT|0.1995;PNP|7.7983;TXN|16.4437;SCGB1A1|0.3532;RARRES1|0.1675;ELANE|0.4246;ACE|2.2909;MMP7|0.0619;FGFR4|6.9823;CDC42|99.0832;ECM1|7.9433	30	2136	159	38520	http://www.ebi.ac.uk/QuickGO/GTerm?id=GO:0008283	[]
4	4	organic substance catabolic process	GO:1901575	3.85e-09	1.2e-07	28.78	2.62	12.23	-2.88385	ANPEP|12.0226;ENPEP|21.0863;MGAM|7.379;GAA|14.4544;APOA4|15.2757;GGT1|5.2;APOA1|18.8799;NAGLU|8.3946;PGK1|6.0256;ENO1|7.8705;GLB1|2.5119;TPI1|15.2757;GAPDH|6.0256;GNS|3.8019;HEXB|2.729;CAT|15.417;BHMT|13.5519;ALDOA|1.7378;IDH1|2.3335;PRDX6|6.9183;PGA3|0.1138;PARK7|5.445;DNASE1|0.1941;SORD|1.7219;FABP1|14.3219;AHCY|2.6546;PNP|7.7983;FUCA1|12.942;GGACT|8.7902;ELANE|0.4246;ACE|2.2909;FAH|5.445;GUSB|…	35	2833	159	38520	http://www.ebi.ac.uk/QuickGO/GTerm?id=GO:1901575	[]
6	5,6	extracellular matrix disassembly	GO:0022617	4.26e-09	1.31e-07	-6.04	-0.95	12.23	-2.88385	FBN1|0.207;DPP4|4.7424;A2M|7.5858;SPP1|0.1406;CDH1|0.7311;NID1|0.4093;ELANE|0.4246;MMP7|0.0619;FGFR4|6.9823	9	131	159	38520	http://www.ebi.ac.uk/QuickGO/GTerm?id=GO:0022617	[]
5	5	protein maturation	GO:0051604	4.33e-09	1.32e-07	11.11	0.81	12.23	-2.88385	C3|1.4997;ANPEP|12.0226;C4A|0.673;ENPEP|21.0863;A2M|7.5858;GGT1|5.2;MME|5.2481;CD55|0.2535;APOH|11.9124;CPE|4.4055;S100A8|0.2965;S100A9|0.3945;FGG|3.0479;ACE|2.2909;KLK6|0.0113	15	514	159	38520	http://www.ebi.ac.uk/QuickGO/GTerm?id=GO:0051604	[]
8	4,8	removal of superoxide radicals	GO:0019430	4.54e-09	1.37e-07	5.83	0.27	12.23	-2.88385	APOA4|15.2757;FBLN5|0.2249;PRDX2|35.6451;SOD1|16.1436;PRDX1|3.1623;PARK7|5.445	6	33	159	38520	http://www.ebi.ac.uk/QuickGO/GTerm?id=GO:0019430	[]
4	4	regulation of immune response	GO:0050776	4.92e-09	1.47e-07	16.95	1.41	12.23	-2.88385	C3|1.4997;PIGR|0.7586;C4A|0.673;A2M|7.5858;IGHG2|17.378;CDH1|0.7311;APOA1|18.8799;OLFM4|0.2512;CD55|0.2535;IGHG1|1.3062;PVRL2|0.0887;HSPA1B|4.3652;MADCAM1|0.7178;P06314|0.1076;HSP90AA1|11.5878;ELANE|0.4246;IGHG3|3.281;P01594|0.0614;FGFR4|6.9823;PLEKHA1|85.5067;CDC42|99.0832;ECM1|7.9433	22	1194	159	38520	http://www.ebi.ac.uk/QuickGO/GTerm?id=GO:0050776	[]
3	3	negative regulation of multicellular organismal process	GO:0051241	5.69e-09	1.69e-07	16.44	1.35	12.23	-2.88385	EFEMP1|0.0904;SPP1|0.1406;VASN|0.1738;F2|0.1009;ANXA1|0.2089;APOA1|18.8799;KLK3|4.4875;ANXA4|3.342;FBLN1|0.1067;SOD1|16.1436;APOH|11.9124;SERPINF1|3.2509;ANXA5|3.6308;GSTP1|11.8032;PRG4|0.2831;FGG|3.0479;SCGB1A1|0.3532;ELANE|0.4246;ARHGDIA|31.3329;ECM1|7.9433	20	990	159	38520	http://www.ebi.ac.uk/QuickGO/GTerm?id=GO:0051241	[]
6	6	regulation of proteolysis	GO:0030162	6.16e-09	1.81e-07	16.62	1.37	12.23	-2.88385	C3|1.4997;C4A|0.673;SERPINA1|29.3765;SERPINA3|19.2309;A2M|7.5858;F2|0.1009;SERPINA5|0.2109;SERPINC1|3.4674;CD55|0.2535;FBLN1|0.1067;PEBP1|6.7298;SERPINF1|3.2509;S100A8|0.2965;S100A9|0.3945;PARK7|5.445;SERPINI1|4.4875;FABP1|14.3219;CST6|0.0692;ITIH1|6.9183;SPINK1|0.5012;FGFR4|6.9823;ECM1|7.9433	22	1209	159	38520	http://www.ebi.ac.uk/QuickGO/GTerm?id=GO:0030162	[]
5	4,5	regulation of cell death	GO:0010941	6.23e-09	1.82e-07	22.11	1.94	12.23	-2.88385	ALB|1.2246;PSAP|7.656;HP|6.6069;ANXA1|0.2089;OLFM4|0.2512;HBB|1.6904;CD248|0.5297;ANXA4|3.342;PRDX2|35.6451;CAT|15.417;SOD1|16.1436;APOH|11.9124;HBA1|1.6144;SERPINF1|3.2509;HSPA1B|4.3652;S100A8|0.2965;NOV|2.8054;ACTN4|10.8643;S100A9|0.3945;ANXA5|3.6308;PARK7|5.445;GSTP1|11.8032;FABP1|14.3219;GLO1|3.1333;FGG|3.0479;TXN|16.4437;ARHGDIA|31.3329;CDC42|99.0832	28	1929	159	38520	http://www.ebi.ac.uk/QuickGO/GTerm?id=GO:0010941	[]
4	4	regulation of catalytic activity	GO:0050790	6.57e-09	1.9e-07	32.71	3.02	12.23	-2.88385	TF|1.2823;C3|1.4997;C4A|0.673;SERPINA1|29.3765;SERPINA3|19.2309;PSAP|7.656;A2M|7.5858;HP|6.6069;APOA4|15.2757;SERPINA5|0.2109;ANXA1|0.2089;SERPINC1|3.4674;APOA1|18.8799;ANXA4|3.342;FBLN1|0.1067;SOD1|16.1436;APOH|11.9124;PEBP1|6.7298;SERPINF1|3.2509;S100A8|0.2965;SH3BGRL3|0.0461;S100A9|0.3945;ANXA5|3.6308;PARK7|5.445;GSTP1|11.8032;SERPINI1|4.4875;FABP1|14.3219;HSP90AA1|11.5878;CST6|0.0692;ITIH1|6.…	39	3488	159	38520	http://www.ebi.ac.uk/QuickGO/GTerm?id=GO:0050790	[]
6	6	endocytosis	GO:0006897	6.87e-09	1.97e-07	13.76	1.08	12.23	-2.88385	ALB|1.2246;LRP2|0.4365;CUBN|0.3597;C3|1.4997;C4A|0.673;HP|6.6069;IGHG2|17.378;APOA1|18.8799;OLFM4|0.2512;HBB|1.6904;IGHG1|1.3062;HBA1|1.6144;ACTN4|10.8643;P06314|0.1076;PRG4|0.2831;HSP90AA1|11.5878;CD63|2.0893;ELANE|0.4246;IGHG3|3.281;P01594|0.0614;CDC42|99.0832	21	1107	159	38520	http://www.ebi.ac.uk/QuickGO/GTerm?id=GO:0006897	[]
5	4,5	positive regulation of cell communication	GO:0010647	7e-09	1.99e-07	21.79	1.9	12.23	-2.88385	TF|1.2823;C3|1.4997;PSAP|7.656;F2|0.1009;APOA1|18.8799;ACPP|5.4954;CAT|15.417;SOD1|16.1436;HSPA1B|4.3652;S100A8|0.2965;ACTN4|10.8643;S100A9|0.3945;ANXA5|3.6308;PARK7|5.445;FABP1|14.3219;FGG|3.0479;TXN|16.4437;CD63|2.0893;ELANE|0.4246;SHISA5|0.2965;ACVR1B|0.1294;MYLK|0.6427;LASP1|0.3436;FGFR4|6.9823;CDC42|99.0832;KLK6|0.0113;ECM1|7.9433	27	1812	159	38520	http://www.ebi.ac.uk/QuickGO/GTerm?id=GO:0010647	[]
6	5,6	negative regulation of cellular protein metabolic process	GO:0032269	7.25e-09	2.04e-07	17.18	1.43	12.23	-2.88385	C3|1.4997;C4A|0.673;SERPINA1|29.3765;SERPINA3|19.2309;A2M|7.5858;F2|0.1009;SERPINA5|0.2109;SERPINC1|3.4674;GAPDH|6.0256;CD55|0.2535;FBLN1|0.1067;PEBP1|6.7298;SERPINF1|3.2509;PARK7|5.445;GSTP1|11.8032;SERPINI1|4.4875;FABP1|14.3219;CST6|0.0692;DAG1|3.02;ITIH1|6.9183;SPINK1|0.5012;ECM1|7.9433	22	1220	159	38520	http://www.ebi.ac.uk/QuickGO/GTerm?id=GO:0032269	[]
7	5,6,7	regulation of intracellular signal transduction	GO:1902531	7.53e-09	2.09e-07	23.75	2.1	12.23	-2.88385	TF|1.2823;C3|1.4997;PSAP|7.656;A2M|7.5858;F2|0.1009;APOA1|18.8799;OLFM4|0.2512;FBLN1|0.1067;CAT|15.417;SOD1|16.1436;PRDX1|3.1623;HSPA1B|4.3652;S100A8|0.2965;ACTN4|10.8643;S100A9|0.3945;PARK7|5.445;GSTP1|11.8032;DAG1|3.02;FGG|3.0479;TXN|16.4437;SPINK1|0.5012;ELANE|0.4246;SHISA5|0.2965;ARHGDIA|31.3329;FGFR4|6.9823;PLEKHA1|85.5067;CDC42|99.0832;ECM1|7.9433	28	1946	159	38520	http://www.ebi.ac.uk/QuickGO/GTerm?id=GO:1902531	[]
6	4,5,6	regulation of signal transduction	GO:0009966	7.54e-09	2.09e-07	30.71	2.82	12.23	-2.88385	TF|1.2823;C3|1.4997;FBN1|0.207;PSAP|7.656;A2M|7.5858;VASN|0.1738;F2|0.1009;APOA1|18.8799;OLFM4|0.2512;CD55|0.2535;IGFBP2|0.2754;ACPP|5.4954;FBLN1|0.1067;CAT|15.417;SOD1|16.1436;PRDX1|3.1623;HSPA1B|4.3652;S100A8|0.2965;ACTN4|10.8643;S100A9|0.3945;PARK7|5.445;GSTP1|11.8032;DAG1|3.02;FGG|3.0479;TXN|16.4437;SPINK1|0.5012;CD63|2.0893;ELANE|0.4246;SHISA5|0.2965;ACVR1B|0.1294;ARHGDIA|31.3329;LASP1|0.343…	37	3203	159	38520	http://www.ebi.ac.uk/QuickGO/GTerm?id=GO:0009966	[]
6	6	cellular response to oxygen radical	GO:0071450	7.91e-09	2.15e-07	5.83	0.27	12.23	-2.88385	APOA4|15.2757;FBLN5|0.2249;PRDX2|35.6451;SOD1|16.1436;PRDX1|3.1623;PARK7|5.445	6	36	159	38520	http://www.ebi.ac.uk/QuickGO/GTerm?id=GO:0071450	[]
7	7	cellular response to superoxide	GO:0071451	7.91e-09	2.15e-07	5.83	0.27	12.23	-2.88385	APOA4|15.2757;FBLN5|0.2249;PRDX2|35.6451;SOD1|16.1436;PRDX1|3.1623;PARK7|5.445	6	36	159	38520	http://www.ebi.ac.uk/QuickGO/GTerm?id=GO:0071451	[]
3	3	regulation of localization	GO:0032879	8.32e-09	2.25e-07	24.53	2.18	12.23	-2.88385	TF|1.2823;C3|1.4997;C4A|0.673;APOA4|15.2757;F2|0.1009;CDH1|0.7311;ANXA1|0.2089;APOA1|18.8799;ROBO4|23.1206;OLFM4|0.2512;ANXA4|3.342;FBLN1|0.1067;APOH|11.9124;PPIA|7.5858;PRDX1|3.1623;SERPINF1|3.2509;S100A8|0.2965;ACTN4|10.8643;SH3BGRL3|0.0461;S100A9|0.3945;MADCAM1|0.7178;ANXA5|3.6308;PARK7|5.445;DAG1|3.02;FGG|3.0479;TXN|16.4437;SPINK1|0.5012;CD63|2.0893;ACE|2.2909;ACVR1B|0.1294;ARHGDIA|31.3329;MY…	34	2775	159	38520	http://www.ebi.ac.uk/QuickGO/GTerm?id=GO:0032879	[]
6	5,6	regulation of reactive oxygen species metabolic process	GO:2000377	1.1e-08	2.96e-07	7.17	0.41	12.23	-2.88385	HP|6.6069;F2|0.1009;HBB|1.6904;FBLN5|0.2249;SOD1|16.1436;ASS1|2.4889;PARK7|5.445;GSTP1|11.8032;HSP90AA1|11.5878	9	146	159	38520	http://www.ebi.ac.uk/QuickGO/GTerm?id=GO:2000377	[]
4	4	lipid metabolic process	GO:0006629	1.22e-08	3.25e-07	23.16	2.04	12.23	-2.88385	ALB|1.2246;LRP2|0.4365;CUBN|0.3597;C3|1.4997;SERPINA3|19.2309;PSAP|7.656;APOA4|15.2757;GGT1|5.2;ANXA1|0.2089;APOA1|18.8799;GLB1|2.5119;ARSA|15.8489;HEXB|2.729;ASAH1|4.9204;CAT|15.417;SOD1|16.1436;APOH|11.9124;IDH1|2.3335;PRDX6|6.9183;FABP1|14.3219;TTR|1.9055;CPNE3|1.6293;APOF|14.1906;BPNT1|12.2462;FGFR4|6.9823;PLEKHA1|85.5067;CDC42|99.0832	27	1861	159	38520	http://www.ebi.ac.uk/QuickGO/GTerm?id=GO:0006629	[]
6	6	response to superoxide	GO:0000303	1.31e-08	3.46e-07	5.83	0.27	12.23	-2.88385	APOA4|15.2757;FBLN5|0.2249;PRDX2|35.6451;SOD1|16.1436;PRDX1|3.1623;PARK7|5.445	6	39	159	38520	http://www.ebi.ac.uk/QuickGO/GTerm?id=GO:0000303	[]
3	3	regulation of molecular function	GO:0065009	1.33e-08	3.49e-07	35.58	3.31	12.23	-2.88385	TF|1.2823;C3|1.4997;C4A|0.673;SERPINA1|29.3765;SERPINA3|19.2309;PSAP|7.656;A2M|7.5858;HP|6.6069;APOA4|15.2757;SERPINA5|0.2109;ANXA1|0.2089;SERPINC1|3.4674;APOA1|18.8799;ANXA4|3.342;FBLN1|0.1067;CAT|15.417;SOD1|16.1436;APOH|11.9124;PEBP1|6.7298;SERPINF1|3.2509;HSPA1B|4.3652;S100A8|0.2965;ACTN4|10.8643;SH3BGRL3|0.0461;S100A9|0.3945;ANXA5|3.6308;PARK7|5.445;GSTP1|11.8032;SERPINI1|4.4875;FABP1|14.321…	42	4052	159	38520	http://www.ebi.ac.uk/QuickGO/GTerm?id=GO:0065009	[]
5	5	superoxide metabolic process	GO:0006801	1.4e-08	3.64e-07	6.9	0.38	12.23	-2.88385	APOA4|15.2757;FBLN5|0.2249;PRDX2|35.6451;SOD1|16.1436;PRDX1|3.1623;PARK7|5.445;GSTP1|11.8032	7	68	159	38520	http://www.ebi.ac.uk/QuickGO/GTerm?id=GO:0006801	[]
5	4,5	regulation of cell communication	GO:0010646	1.45e-08	3.73e-07	32.62	3.01	12.23	-2.88385	TF|1.2823;C3|1.4997;FBN1|0.207;PSAP|7.656;A2M|7.5858;VASN|0.1738;F2|0.1009;APOA1|18.8799;OLFM4|0.2512;CD55|0.2535;IGFBP2|0.2754;ACPP|5.4954;FBLN1|0.1067;CAT|15.417;SOD1|16.1436;PRDX1|3.1623;HSPA1B|4.3652;S100A8|0.2965;ACTN4|10.8643;S100A9|0.3945;ANXA5|3.6308;PARK7|5.445;GSTP1|11.8032;FABP1|14.3219;DAG1|3.02;FGG|3.0479;TXN|16.4437;SPINK1|0.5012;CD63|2.0893;ELANE|0.4246;SHISA5|0.2965;ACVR1B|0.1294;…	40	3746	159	38520	http://www.ebi.ac.uk/QuickGO/GTerm?id=GO:0010646	[]
3	3	immune effector process	GO:0002252	1.49e-08	3.82e-07	14.4	1.15	12.23	-2.88385	C3|1.4997;C4A|0.673;A2M|7.5858;IGHG2|17.378;APOA1|18.8799;CD55|0.2535;IGHG1|1.3062;PVRL2|0.0887;PRDX1|3.1623;ANXA5|3.6308;P06314|0.1076;FABP1|14.3219;HSP90AA1|11.5878;ELANE|0.4246;ACE|2.2909;IGHG3|3.281;MYLK|0.6427;P01594|0.0614;CDC42|99.0832	19	944	159	38520	http://www.ebi.ac.uk/QuickGO/GTerm?id=GO:0002252	[]
3	3	positive regulation of immune system process	GO:0002684	1.54e-08	3.84e-07	6.64	0.35	12.23	-2.88385	C3|1.4997;C4A|0.673;DPP4|4.7424;A2M|7.5858;IGHG2|17.378;ANXA1|0.2089;CD55|0.2535;IGFBP2|0.2754;IGHG1|1.3062;PVRL2|0.0887;HSPA1B|4.3652;MADCAM1|0.7178;P06314|0.1076;HSP90AA1|11.5878;PNP|7.7983;ELANE|0.4246;IGHG3|3.281;ACVR1B|0.1294;P01594|0.0614;PLEKHA1|85.5067;CDC42|99.0832	21	1160	159	38520	http://www.ebi.ac.uk/QuickGO/GTerm?id=GO:0002684	[]
5	5	response to oxygen radical	GO:0000305	1.54e-08	3.84e-07	5.83	0.27	12.23	-2.88385	APOA4|15.2757;FBLN5|0.2249;PRDX2|35.6451;SOD1|16.1436;PRDX1|3.1623;PARK7|5.445	6	40	159	38520	http://www.ebi.ac.uk/QuickGO/GTerm?id=GO:0000305	[]
6	5,6	regulation of substrate adhesion-dependent cell spreading	GO:1900024	1.54e-08	3.84e-07	6.36	0.32	12.23	-2.88385	APOA1|18.8799;OLFM4|0.2512;FBLN1|0.1067;ACTN4|10.8643;FGG|3.0479;CDC42|99.0832	6	40	159	38520	http://www.ebi.ac.uk/QuickGO/GTerm?id=GO:1900024	[]
4	4	interaction with host	GO:0051701	2.08e-08	5.13e-07	6.46	0.33	12.23	-2.88385	ALB|1.2246;ANPEP|12.0226;DPP4|4.7424;CD55|0.2535;FBLN1|0.1067;PPIA|7.5858;PVRL2|0.0887;HSPA1B|4.3652;DAG1|3.02	9	157	159	38520	http://www.ebi.ac.uk/QuickGO/GTerm?id=GO:0051701	[]
3	3	single-organism localization	GO:1902578	2.08e-08	5.13e-07	42.35	4.01	12.23	-2.88385	ALB|1.2246;TF|1.2823;CUBN|0.3597;C3|1.4997;PIGR|0.7586;C4A|0.673;SERPINA1|29.3765;PSAP|7.656;A2M|7.5858;IGHG2|17.378;GAA|14.4544;APOA4|15.2757;F2|0.1009;SERPINA5|0.2109;CDH1|0.7311;ANXA1|0.2089;APOA1|18.8799;HSPA8|4.3251;OLFM4|0.2512;HBB|1.6904;AFM|8.6298;CA1|26.3027;FBLN5|0.2249;ANXA4|3.342;FBLN1|0.1067;IGHG1|1.3062;SOD1|16.1436;APOH|11.9124;CPE|4.4055;ALDOA|1.7378;PPIA|7.5858;HBA1|1.6144;PRDX1|…	59	7088	159	38520	http://www.ebi.ac.uk/QuickGO/GTerm?id=GO:1902578	[]
7	4,5,6,7	positive regulation of signal transduction	GO:0009967	2.2e-08	5.37e-07	19.88	1.71	12.23	-2.88385	TF|1.2823;C3|1.4997;PSAP|7.656;F2|0.1009;APOA1|18.8799;ACPP|5.4954;CAT|15.417;SOD1|16.1436;HSPA1B|4.3652;S100A8|0.2965;ACTN4|10.8643;S100A9|0.3945;PARK7|5.445;FGG|3.0479;TXN|16.4437;CD63|2.0893;ELANE|0.4246;SHISA5|0.2965;ACVR1B|0.1294;LASP1|0.3436;FGFR4|6.9823;CDC42|99.0832;KLK6|0.0113;ECM1|7.9433	24	1536	159	38520	http://www.ebi.ac.uk/QuickGO/GTerm?id=GO:0009967	[]
4	4	regulation of cell proliferation	GO:0042127	2.3e-08	5.57e-07	-20.3	-2.41	12.23	-2.88385	DPP4|4.7424;F2|0.1009;CDH1|0.7311;ANXA1|0.2089;IGFBP7|0.0655;CD55|0.2535;CD248|0.5297;IGFBP2|0.2754;FBLN1|0.1067;APOH|11.9124;SERPINF1|3.2509;GSTP1|11.8032;PRG4|0.2831;FABP1|14.3219;REG1A|0.0441;DPT|0.1995;PNP|7.7983;SCGB1A1|0.3532;RARRES1|0.1675;ELANE|0.4246;ACE|2.2909;MMP7|0.0619;FGFR4|6.9823;CDC42|99.0832;ECM1|7.9433	25	1663	159	38520	http://www.ebi.ac.uk/QuickGO/GTerm?id=GO:0042127	[]
6	5,6	tissue homeostasis	GO:0001894	2.35e-08	5.67e-07	5.38	0.22	12.23	-2.88385	ALB|1.2246;TF|1.2823;CUBN|0.3597;PIGR|0.7586;SERPINA3|19.2309;SPP1|0.1406;SOD1|16.1436;PRDX1|3.1623;LYZ|0.5445;IGHG3|3.281	10	214	159	38520	http://www.ebi.ac.uk/QuickGO/GTerm?id=GO:0001894	[]
4	4	regulation of cell motility	GO:2000145	2.54e-08	6.07e-07	12.02	0.9	12.23	-2.88385	TF|1.2823;ROBO4|23.1206;OLFM4|0.2512;FBLN1|0.1067;APOH|11.9124;SERPINF1|3.2509;ACTN4|10.8643;SH3BGRL3|0.0461;MADCAM1|0.7178;ANXA5|3.6308;DAG1|3.02;ACE|2.2909;ACVR1B|0.1294;ARHGDIA|31.3329;MYLK|0.6427;ECM1|7.9433	16	678	159	38520	http://www.ebi.ac.uk/QuickGO/GTerm?id=GO:2000145	[]
3	3	cellular component organization	GO:0016043	2.68e-08	6.36e-07	50.92	4.88	12.23	-2.88385	TF|1.2823;C3|1.4997;PIGR|0.7586;FBN1|0.207;C4A|0.673;DPP4|4.7424;A2M|7.5858;GAA|14.4544;KRT13|0.278;EFEMP1|0.0904;APOA4|15.2757;SPP1|0.1406;VASN|0.1738;F2|0.1009;SERPINA5|0.2109;CDH1|0.7311;ANXA1|0.2089;IGFBP7|0.0655;APOA1|18.8799;NAGLU|8.3946;ENO1|7.8705;HSPA8|4.3251;OLFM4|0.2512;GAPDH|6.0256;HBB|1.6904;NID1|0.4093;FBLN5|0.2249;IGFBP2|0.2754;HEXB|2.729;FBLN1|0.1067;HEG1|0.0839;CAT|15.417;SOD1|16…	69	9076	159	38520	http://www.ebi.ac.uk/QuickGO/GTerm?id=GO:0016043	[]
7	6,7	retina homeostasis	GO:0001895	2.8e-08	6.61e-07	2.8	-0.04	12.23	-2.88385	ALB|1.2246;TF|1.2823;PIGR|0.7586;SOD1|16.1436;PRDX1|3.1623;LYZ|0.5445;IGHG3|3.281	7	75	159	38520	http://www.ebi.ac.uk/QuickGO/GTerm?id=GO:0001895	[]
6	4,5,6	negative regulation of macromolecule metabolic process	GO:0010605	3.03e-08	7.1e-07	27.08	2.44	12.23	-2.88385	C3|1.4997;C4A|0.673;SERPINA1|29.3765;SERPINA3|19.2309;A2M|7.5858;APOA4|15.2757;F2|0.1009;SERPINA5|0.2109;SERPINC1|3.4674;ENO1|7.8705;HSPA8|4.3251;GAPDH|6.0256;CD55|0.2535;ANXA4|3.342;FBLN1|0.1067;CAT|15.417;PEBP1|6.7298;SERPINF1|3.2509;PARK7|5.445;GSTP1|11.8032;SERPINI1|4.4875;PRG4|0.2831;FABP1|14.3219;CST6|0.0692;DAG1|3.02;ITIH1|6.9183;TXN|16.4437;SCGB1A1|0.3532;SPINK1|0.5012;ELANE|0.4246;ACVR1B…	33	2778	159	38520	http://www.ebi.ac.uk/QuickGO/GTerm?id=GO:0010605	[]
4	4	cell-substrate adhesion	GO:0031589	3.11e-08	7.22e-07	-1.99	-0.53	12.23	-2.88385	SPP1|0.1406;APOA1|18.8799;OLFM4|0.2512;NID1|0.4093;FBLN5|0.2249;FBLN1|0.1067;ACTN4|10.8643;MADCAM1|0.7178;DAG1|3.02;FGG|3.0479;CD63|2.0893;CDC42|99.0832	12	353	159	38520	http://www.ebi.ac.uk/QuickGO/GTerm?id=GO:0031589	[]
5	5	cellular response to oxygen-containing compound	GO:1901701	3.37e-08	7.78e-07	16.49	1.36	12.23	-2.88385	FBN1|0.207;PSAP|7.656;KRT13|0.278;APOA4|15.2757;CDH1|0.7311;ANXA1|0.2089;CD55|0.2535;FBLN5|0.2249;PRDX2|35.6451;SOD1|16.1436;ASS1|2.4889;PRDX1|3.1623;SERPINF1|3.2509;PARK7|5.445;GSTP1|11.8032;FABP1|14.3219;TXN|16.4437;FGFR4|6.9823;PLEKHA1|85.5067	19	994	159	38520	http://www.ebi.ac.uk/QuickGO/GTerm?id=GO:1901701	[]
5	5	anatomical structure homeostasis	GO:0060249	3.41e-08	7.81e-07	6.78	0.37	12.23	-2.88385	ALB|1.2246;TF|1.2823;CUBN|0.3597;PIGR|0.7586;SERPINA3|19.2309;GAA|14.4544;SPP1|0.1406;SOD1|16.1436;ALDOA|1.7378;PRDX1|3.1623;LYZ|0.5445;IGHG3|3.281	12	356	159	38520	http://www.ebi.ac.uk/QuickGO/GTerm?id=GO:0060249	[]
8	5,6,7,8	positive regulation of intracellular signal transduction	GO:1902533	3.59e-08	8.18e-07	15.52	1.26	12.23	-2.88385	TF|1.2823;C3|1.4997;PSAP|7.656;F2|0.1009;APOA1|18.8799;CAT|15.417;SOD1|16.1436;HSPA1B|4.3652;S100A8|0.2965;ACTN4|10.8643;S100A9|0.3945;PARK7|5.445;FGG|3.0479;TXN|16.4437;ELANE|0.4246;SHISA5|0.2965;FGFR4|6.9823;CDC42|99.0832;ECM1|7.9433	19	998	159	38520	http://www.ebi.ac.uk/QuickGO/GTerm?id=GO:1902533	[]
5	4,5	negative regulation of cell death	GO:0060548	4.2e-08	9.49e-07	16.02	1.31	12.23	-2.88385	ALB|1.2246;PSAP|7.656;ANXA1|0.2089;ANXA4|3.342;PRDX2|35.6451;CAT|15.417;SOD1|16.1436;APOH|11.9124;SERPINF1|3.2509;HSPA1B|4.3652;NOV|2.8054;ANXA5|3.6308;PARK7|5.445;GSTP1|11.8032;FABP1|14.3219;GLO1|3.1333;FGG|3.0479;TXN|16.4437;ARHGDIA|31.3329	19	1008	159	38520	http://www.ebi.ac.uk/QuickGO/GTerm?id=GO:0060548	[]
4	4	response to organic substance	GO:0010033	4.87e-08	1.09e-06	25.85	2.32	12.23	-2.88385	C3|1.4997;FBN1|0.207;PSAP|7.656;KRT13|0.278;APOA4|15.2757;SPP1|0.1406;VASN|0.1738;CDH1|0.7311;ANXA1|0.2089;APOA1|18.8799;MME|5.2481;HSPA8|4.3251;GAPDH|6.0256;CD55|0.2535;IGFBP2|0.2754;CAT|15.417;SOD1|16.1436;ACP2|2.5823;ASS1|2.4889;IDH1|2.3335;SERPINF1|3.2509;HSPA1B|4.3652;S100A8|0.2965;GPX3|15.1356;S100A9|0.3945;ANXA5|3.6308;PARK7|5.445;GSTP1|11.8032;SORD|1.7219;HSP90AA1|11.5878;DAG1|3.02;SCGB1A…	37	3440	159	38520	http://www.ebi.ac.uk/QuickGO/GTerm?id=GO:0010033	[]
5	5	regulation of lipid metabolic process	GO:0019216	5.18e-08	1.15e-06	11.06	0.8	12.23	-2.88385	C3|1.4997;SERPINA3|19.2309;PSAP|7.656;APOA4|15.2757;ANXA1|0.2089;APOA1|18.8799;SOD1|16.1436;IDH1|2.3335;FABP1|14.3219;FGFR4|6.9823;CDC42|99.0832	11	298	159	38520	http://www.ebi.ac.uk/QuickGO/GTerm?id=GO:0019216	[]
6	5,6	regulation of cellular protein metabolic process	GO:0032268	5.36e-08	1.18e-06	28.24	2.56	12.23	-2.88385	TF|1.2823;C3|1.4997;C4A|0.673;SERPINA1|29.3765;SERPINA3|19.2309;PSAP|7.656;A2M|7.5858;F2|0.1009;SERPINA5|0.2109;SERPINC1|3.4674;APOA1|18.8799;GAPDH|6.0256;CD55|0.2535;FBLN1|0.1067;SOD1|16.1436;PEBP1|6.7298;PRDX1|3.1623;SERPINF1|3.2509;S100A8|0.2965;S100A9|0.3945;PARK7|5.445;GSTP1|11.8032;SERPINI1|4.4875;FABP1|14.3219;CST6|0.0692;DAG1|3.02;FGG|3.0479;ITIH1|6.9183;TXN|16.4437;SPINK1|0.5012;ELANE|0.…	36	3298	159	38520	http://www.ebi.ac.uk/QuickGO/GTerm?id=GO:0032268	[]
6	5,6	secretion	GO:0046903	5.36e-08	1.18e-06	16.02	1.31	12.23	-2.88385	ALB|1.2246;TF|1.2823;SERPINA1|29.3765;PSAP|7.656;A2M|7.5858;ANXA1|0.2089;APOA1|18.8799;HSPA8|4.3251;FBLN5|0.2249;ANXA4|3.342;FBLN1|0.1067;SOD1|16.1436;ALDOA|1.7378;PPIA|7.5858;S100A8|0.2965;ACTN4|10.8643;S100A9|0.3945;FGG|3.0479;PNP|7.7983;SPINK1|0.5012;CD63|2.0893;ACE|2.2909;MMP7|0.0619	23	1487	159	38520	http://www.ebi.ac.uk/QuickGO/GTerm?id=GO:0046903	[]
7	5,6,7	positive regulation of reactive oxygen species metabolic process	GO:2000379	5.71e-08	1.25e-06	5.7	0.26	12.23	-2.88385	F2|0.1009;HBB|1.6904;SOD1|16.1436;ASS1|2.4889;PARK7|5.445;GSTP1|11.8032;HSP90AA1|11.5878	7	83	159	38520	http://www.ebi.ac.uk/QuickGO/GTerm?id=GO:2000379	[]
3	3	movement in environment of other organism involved in symbiotic interaction	GO:0052192	6.2e-08	1.3e-06	5.4	0.23	12.23	-2.88385	ANPEP|12.0226;DPP4|4.7424;CD55|0.2535;PPIA|7.5858;PVRL2|0.0887;HSPA1B|4.3652;DAG1|3.02	7	84	159	38520	http://www.ebi.ac.uk/QuickGO/GTerm?id=GO:0052192	[]
6	5,6	entry into host	GO:0044409	6.2e-08	1.3e-06	5.4	0.23	12.23	-2.88385	ANPEP|12.0226;DPP4|4.7424;CD55|0.2535;PPIA|7.5858;PVRL2|0.0887;HSPA1B|4.3652;DAG1|3.02	7	84	159	38520	http://www.ebi.ac.uk/QuickGO/GTerm?id=GO:0044409	[]
5	5	entry into cell of other organism involved in symbiotic interaction	GO:0051806	6.2e-08	1.3e-06	5.4	0.23	12.23	-2.88385	ANPEP|12.0226;DPP4|4.7424;CD55|0.2535;PPIA|7.5858;PVRL2|0.0887;HSPA1B|4.3652;DAG1|3.02	7	84	159	38520	http://www.ebi.ac.uk/QuickGO/GTerm?id=GO:0051806	[]
5	4,5	movement in host environment	GO:0052126	6.2e-08	1.3e-06	5.4	0.23	12.23	-2.88385	ANPEP|12.0226;DPP4|4.7424;CD55|0.2535;PPIA|7.5858;PVRL2|0.0887;HSPA1B|4.3652;DAG1|3.02	7	84	159	38520	http://www.ebi.ac.uk/QuickGO/GTerm?id=GO:0052126	[]
4	4	entry into other organism involved in symbiotic interaction	GO:0051828	6.2e-08	1.3e-06	5.4	0.23	12.23	-2.88385	ANPEP|12.0226;DPP4|4.7424;CD55|0.2535;PPIA|7.5858;PVRL2|0.0887;HSPA1B|4.3652;DAG1|3.02	7	84	159	38520	http://www.ebi.ac.uk/QuickGO/GTerm?id=GO:0051828	[]
6	6	entry into host cell	GO:0030260	6.2e-08	1.3e-06	5.4	0.23	12.23	-2.88385	ANPEP|12.0226;DPP4|4.7424;CD55|0.2535;PPIA|7.5858;PVRL2|0.0887;HSPA1B|4.3652;DAG1|3.02	7	84	159	38520	http://www.ebi.ac.uk/QuickGO/GTerm?id=GO:0030260	[]
6	5,6	glutathione metabolic process	GO:0006749	6.2e-08	1.3e-06	6.36	0.32	12.23	-2.88385	GGT1|5.2;SOD1|16.1436;IDH1|2.3335;GSTA2|18.5353;CNDP2|17.0608;GSTP1|11.8032;GLO1|3.1333	7	84	159	38520	http://www.ebi.ac.uk/QuickGO/GTerm?id=GO:0006749	[]
2	2	growth	GO:0040007	6.34e-08	1.32e-06	-17.68	-2.14	12.23	-2.88385	C3|1.4997;PSAP|7.656;SPP1|0.1406;F2|0.1009;ANXA1|0.2089;IGFBP7|0.0655;ENO1|7.8705;FBLN5|0.2249;IGFBP2|0.2754;HEG1|0.0839;SOD1|16.1436;S100A8|0.2965;NOV|2.8054;S100A9|0.3945;ELANE|0.4246;ACVR1B|0.1294;PLEKHA1|85.5067;CDC42|99.0832;KLK6|0.0113	19	1035	159	38520	http://www.ebi.ac.uk/QuickGO/GTerm?id=GO:0040007	[]
2	2	biological regulation	GO:0065007	7.15e-08	1.47e-06	88.29	8.71	12.23	-2.88385	ALB|1.2246;LRP2|0.4365;TF|1.2823;CUBN|0.3597;C3|1.4997;PIGR|0.7586;FBN1|0.207;ANPEP|12.0226;C4A|0.673;ENPEP|21.0863;SERPINA1|29.3765;SERPINA3|19.2309;DPP4|4.7424;PSAP|7.656;A2M|7.5858;HP|6.6069;IGHG2|17.378;GAA|14.4544;EFEMP1|0.0904;APOA4|15.2757;SPP1|0.1406;VASN|0.1738;F2|0.1009;GGT1|5.2;SERPINA5|0.2109;CDH1|0.7311;ANXA1|0.2089;IGFBP7|0.0655;SERPINC1|3.4674;APOA1|18.8799;MME|5.2481;ROBO4|23.1206…	116	20133	159	38520	http://www.ebi.ac.uk/QuickGO/GTerm?id=GO:0065007	[]
4	4	cellular catabolic process	GO:0044248	7.4e-08	1.52e-06	24.65	2.19	12.23	-2.88385	ANPEP|12.0226;ENPEP|21.0863;MGAM|7.379;HP|6.6069;GAA|14.4544;APOA4|15.2757;GGT1|5.2;APOA1|18.8799;GLB1|2.5119;HBB|1.6904;GNS|3.8019;HEXB|2.729;PRDX2|35.6451;CAT|15.417;BHMT|13.5519;HBA1|1.6144;PRDX1|3.1623;IDH1|2.3335;S100A8|0.2965;PRDX6|6.9183;GPX3|15.1356;S100A9|0.3945;ANXA5|3.6308;PARK7|5.445;DNASE1|0.1941;SORD|1.7219;FABP1|14.3219;AHCY|2.6546;PNP|7.7983;ACE|2.2909;FAH|5.445;MYLK|0.6427;UBA1|0…	33	2885	159	38520	http://www.ebi.ac.uk/QuickGO/GTerm?id=GO:0044248	[]
5	5	NADH regeneration	GO:0006735	8.44e-08	1.68e-06	3.88	0.07	12.23	-2.88385	PGK1|6.0256;ENO1|7.8705;TPI1|15.2757;GAPDH|6.0256;ALDOA|1.7378	5	27	159	38520	http://www.ebi.ac.uk/QuickGO/GTerm?id=GO:0006735	[]
7	7	glycolytic process through glucose-6-phosphate	GO:0061620	8.44e-08	1.68e-06	3.88	0.07	12.23	-2.88385	PGK1|6.0256;ENO1|7.8705;TPI1|15.2757;GAPDH|6.0256;ALDOA|1.7378	5	27	159	38520	http://www.ebi.ac.uk/QuickGO/GTerm?id=GO:0061620	[]
9	9	glucose catabolic process to pyruvate	GO:0061718	8.44e-08	1.68e-06	3.88	0.07	12.23	-2.88385	PGK1|6.0256;ENO1|7.8705;TPI1|15.2757;GAPDH|6.0256;ALDOA|1.7378	5	27	159	38520	http://www.ebi.ac.uk/QuickGO/GTerm?id=GO:0061718	[]
8	6,8	canonical glycolysis	GO:0061621	8.44e-08	1.68e-06	3.88	0.07	12.23	-2.88385	PGK1|6.0256;ENO1|7.8705;TPI1|15.2757;GAPDH|6.0256;ALDOA|1.7378	5	27	159	38520	http://www.ebi.ac.uk/QuickGO/GTerm?id=GO:0061621	[]
6	6	glycolytic process through fructose-6-phosphate	GO:0061615	8.44e-08	1.68e-06	3.88	0.07	12.23	-2.88385	PGK1|6.0256;ENO1|7.8705;TPI1|15.2757;GAPDH|6.0256;ALDOA|1.7378	5	27	159	38520	http://www.ebi.ac.uk/QuickGO/GTerm?id=GO:0061615	[]
6	5,6	regulation of cellular response to oxidative stress	GO:1900407	9.86e-08	1.93e-06	5.51	0.24	12.23	-2.88385	PSAP|7.656;HP|6.6069;FBLN5|0.2249;SOD1|16.1436;PARK7|5.445;TXN|16.4437	6	54	159	38520	http://www.ebi.ac.uk/QuickGO/GTerm?id=GO:1900407	[]
2	2	cellular component organization or biogenesis	GO:0071840	9.87e-08	1.93e-06	50.92	4.88	12.23	-2.88385	TF|1.2823;C3|1.4997;PIGR|0.7586;FBN1|0.207;C4A|0.673;DPP4|4.7424;A2M|7.5858;GAA|14.4544;KRT13|0.278;EFEMP1|0.0904;APOA4|15.2757;SPP1|0.1406;VASN|0.1738;F2|0.1009;SERPINA5|0.2109;CDH1|0.7311;ANXA1|0.2089;IGFBP7|0.0655;APOA1|18.8799;NAGLU|8.3946;ENO1|7.8705;HSPA8|4.3251;OLFM4|0.2512;GAPDH|6.0256;HBB|1.6904;NID1|0.4093;FBLN5|0.2249;IGFBP2|0.2754;HEXB|2.729;FBLN1|0.1067;HEG1|0.0839;CAT|15.417;SOD1|16…	69	9364	159	38520	http://www.ebi.ac.uk/QuickGO/GTerm?id=GO:0071840	[]
6	4,5,6	negative regulation of cellular metabolic process	GO:0031324	9.88e-08	1.93e-06	25.01	2.23	12.23	-2.88385	C3|1.4997;C4A|0.673;SERPINA1|29.3765;SERPINA3|19.2309;A2M|7.5858;HP|6.6069;APOA4|15.2757;F2|0.1009;SERPINA5|0.2109;SERPINC1|3.4674;ENO1|7.8705;HSPA8|4.3251;GAPDH|6.0256;CD55|0.2535;ANXA4|3.342;FBLN1|0.1067;CAT|15.417;PEBP1|6.7298;SERPINF1|3.2509;PARK7|5.445;GSTP1|11.8032;SERPINI1|4.4875;PRG4|0.2831;FABP1|14.3219;CST6|0.0692;DAG1|3.02;ITIH1|6.9183;TXN|16.4437;SCGB1A1|0.3532;SPINK1|0.5012;ELANE|0.4…	32	2772	159	38520	http://www.ebi.ac.uk/QuickGO/GTerm?id=GO:0031324	[]
9	8,9	NAD metabolic process	GO:0019674	1e-07	1.95e-06	5.72	0.26	12.23	-2.88385	PGK1|6.0256;ENO1|7.8705;TPI1|15.2757;GAPDH|6.0256;LDHB|8.9536;ALDOA|1.7378;PNP|7.7983	7	90	159	38520	http://www.ebi.ac.uk/QuickGO/GTerm?id=GO:0019674	[]
4	4	negative regulation of response to external stimulus	GO:0032102	1.01e-07	1.96e-06	7.74	0.46	12.23	-2.88385	SPP1|0.1406;F2|0.1009;SERPINC1|3.4674;APOA1|18.8799;APOH|11.9124;SERPINF1|3.2509;ANXA5|3.6308;GSTP1|11.8032;FGG|3.0479;ELANE|0.4246	10	250	159	38520	http://www.ebi.ac.uk/QuickGO/GTerm?id=GO:0032102	[]
5	4,5	single-organism transport	GO:0044765	1.02e-07	1.96e-06	40.4	3.81	12.23	-2.88385	ALB|1.2246;TF|1.2823;CUBN|0.3597;C3|1.4997;PIGR|0.7586;C4A|0.673;SERPINA1|29.3765;PSAP|7.656;A2M|7.5858;IGHG2|17.378;APOA4|15.2757;F2|0.1009;SERPINA5|0.2109;CDH1|0.7311;ANXA1|0.2089;APOA1|18.8799;HSPA8|4.3251;OLFM4|0.2512;HBB|1.6904;AFM|8.6298;CA1|26.3027;FBLN5|0.2249;ANXA4|3.342;FBLN1|0.1067;IGHG1|1.3062;SOD1|16.1436;APOH|11.9124;ALDOA|1.7378;PPIA|7.5858;HBA1|1.6144;PRDX1|3.1623;LCN2|0.2051;S100…	56	6834	159	38520	http://www.ebi.ac.uk/QuickGO/GTerm?id=GO:0044765	[]
5	4,5	innate immune response	GO:0045087	1.03e-07	1.97e-06	17.17	1.43	12.23	-2.88385	C3|1.4997;C4A|0.673;A2M|7.5858;IGHG2|17.378;APOA4|15.2757;GAPDH|6.0256;CD55|0.2535;IGHG1|1.3062;ASS1|2.4889;PVRL2|0.0887;PRDX1|3.1623;LCN2|0.2051;HSPA1B|4.3652;S100A8|0.2965;S100A9|0.3945;P06314|0.1076;HSP90AA1|11.5878;TXN|16.4437;IGHG3|3.281;P01594|0.0614;FGFR4|6.9823;CDC42|99.0832	22	1419	159	38520	http://www.ebi.ac.uk/QuickGO/GTerm?id=GO:0045087	[]
5	5	carbohydrate catabolic process	GO:0016052	1.09e-07	2.07e-06	6.98	0.39	12.23	-2.88385	MGAM|7.379;GAA|14.4544;PGK1|6.0256;ENO1|7.8705;GLB1|2.5119;TPI1|15.2757;GAPDH|6.0256;HEXB|2.729;ALDOA|1.7378;SORD|1.7219	10	252	159	38520	http://www.ebi.ac.uk/QuickGO/GTerm?id=GO:0016052	[]
4	4	regulation of cellular component movement	GO:0051270	1.1e-07	2.08e-06	12.02	0.9	12.23	-2.88385	TF|1.2823;ROBO4|23.1206;OLFM4|0.2512;FBLN1|0.1067;APOH|11.9124;SERPINF1|3.2509;ACTN4|10.8643;SH3BGRL3|0.0461;MADCAM1|0.7178;ANXA5|3.6308;DAG1|3.02;ACE|2.2909;ACVR1B|0.1294;ARHGDIA|31.3329;MYLK|0.6427;ECM1|7.9433	16	755	159	38520	http://www.ebi.ac.uk/QuickGO/GTerm?id=GO:0051270	[]
5	4,5	single organismal cell-cell adhesion	GO:0016337	1.14e-07	2.15e-06	3.5	0.03	12.23	-2.88385	DPP4|4.7424;APOA4|15.2757;CDH1|0.7311;ANXA1|0.2089;APOA1|18.8799;HBB|1.6904;CD55|0.2535;IGFBP2|0.2754;SOD1|16.1436;ASS1|2.4889;S100A8|0.2965;S100A9|0.3945;MADCAM1|0.7178;FGG|3.0479;PNP|7.7983;SCGB1A1|0.3532;CDC42|99.0832	17	859	159	38520	http://www.ebi.ac.uk/QuickGO/GTerm?id=GO:0016337	[]
7	7	hexose catabolic process	GO:0019320	1.23e-07	2.28e-06	4.28	0.11	12.23	-2.88385	PGK1|6.0256;ENO1|7.8705;GLB1|2.5119;TPI1|15.2757;GAPDH|6.0256;ALDOA|1.7378	6	56	159	38520	http://www.ebi.ac.uk/QuickGO/GTerm?id=GO:0019320	[]
6	5,6	regulation of extracellular matrix organization	GO:1903053	1.23e-07	2.28e-06	3.37	0.02	12.23	-2.88385	DPP4|4.7424;HSPA8|4.3251;PARK7|5.445;DAG1|3.02;FGFR4|6.9823	5	29	159	38520	http://www.ebi.ac.uk/QuickGO/GTerm?id=GO:1903053	[]
6	6	regulation of response to reactive oxygen species	GO:1901031	1.23e-07	2.28e-06	4.3	0.11	12.23	-2.88385	PSAP|7.656;HP|6.6069;FBLN5|0.2249;PARK7|5.445;TXN|16.4437	5	29	159	38520	http://www.ebi.ac.uk/QuickGO/GTerm?id=GO:1901031	[]
4	4	humoral immune response	GO:0006959	1.24e-07	2.28e-06	4.16	0.1	12.23	-2.88385	C3|1.4997;C4A|0.673;A2M|7.5858;IGHG2|17.378;CD55|0.2535;KLK3|4.4875;IGHG1|1.3062;P06314|0.1076;IGHG3|3.281;MMP7|0.0619;P01594|0.0614	11	325	159	38520	http://www.ebi.ac.uk/QuickGO/GTerm?id=GO:0006959	[]
3	3	positive regulation of signaling	GO:0023056	1.27e-07	2.32e-06	19.88	1.71	12.23	-2.88385	TF|1.2823;C3|1.4997;PSAP|7.656;F2|0.1009;APOA1|18.8799;ACPP|5.4954;CAT|15.417;SOD1|16.1436;HSPA1B|4.3652;S100A8|0.2965;ACTN4|10.8643;S100A9|0.3945;PARK7|5.445;FGG|3.0479;TXN|16.4437;CD63|2.0893;ELANE|0.4246;SHISA5|0.2965;ACVR1B|0.1294;LASP1|0.3436;FGFR4|6.9823;CDC42|99.0832;KLK6|0.0113;ECM1|7.9433	24	1688	159	38520	http://www.ebi.ac.uk/QuickGO/GTerm?id=GO:0023056	[]
5	4,5	complement activation	GO:0006956	1.28e-07	2.33e-06	2.95	-0.03	12.23	-2.88385	C3|1.4997;C4A|0.673;A2M|7.5858;IGHG2|17.378;CD55|0.2535;IGHG1|1.3062;P06314|0.1076;IGHG3|3.281;P01594|0.0614	9	194	159	38520	http://www.ebi.ac.uk/QuickGO/GTerm?id=GO:0006956	[]
5	5	response to lipid	GO:0033993	1.3e-07	2.35e-06	-5.83	-0.92	12.23	-2.88385	C3|1.4997;KRT13|0.278;SPP1|0.1406;ANXA1|0.2089;APOA1|18.8799;CD55|0.2535;IGFBP2|0.2754;CAT|15.417;ASS1|2.4889;IDH1|2.3335;SERPINF1|3.2509;S100A8|0.2965;S100A9|0.3945;GSTP1|11.8032;SCGB1A1|0.3532;ELANE|0.4246;FGFR4|6.9823	17	867	159	38520	http://www.ebi.ac.uk/QuickGO/GTerm?id=GO:0033993	[]
5	5	response to alcohol	GO:0097305	1.32e-07	2.37e-06	-3.48	-0.68	12.23	-2.88385	C3|1.4997;SPP1|0.1406;CDH1|0.7311;ANXA1|0.2089;IGFBP2|0.2754;CAT|15.417;SOD1|16.1436;ASS1|2.4889;SERPINF1|3.2509;S100A8|0.2965;S100A9|0.3945	11	327	159	38520	http://www.ebi.ac.uk/QuickGO/GTerm?id=GO:0097305	[]
7	7	protein nitrosylation	GO:0017014	1.35e-07	2.38e-06	-0.21	-0.35	12.23	-2.88385	GAPDH|6.0256;S100A8|0.2965;S100A9|0.3945;ACE|2.2909	4	12	159	38520	http://www.ebi.ac.uk/QuickGO/GTerm?id=GO:0017014	[]
10	5,6,8,10	angiotensin maturation	GO:0002003	1.35e-07	2.38e-06	3.48	0.03	12.23	-2.88385	ANPEP|12.0226;ENPEP|21.0863;MME|5.2481;ACE|2.2909	4	12	159	38520	http://www.ebi.ac.uk/QuickGO/GTerm?id=GO:0002003	[]
8	8	peptidyl-cysteine S-nitrosylation	GO:0018119	1.35e-07	2.38e-06	-0.21	-0.35	12.23	-2.88385	GAPDH|6.0256;S100A8|0.2965;S100A9|0.3945;ACE|2.2909	4	12	159	38520	http://www.ebi.ac.uk/QuickGO/GTerm?id=GO:0018119	[]
7	7	monocarboxylic acid metabolic process	GO:0032787	1.44e-07	2.53e-06	12.06	0.91	12.23	-2.88385	ALB|1.2246;C3|1.4997;APOA4|15.2757;GGT1|5.2;ANXA1|0.2089;APOA1|18.8799;PGK1|6.0256;ENO1|7.8705;TPI1|15.2757;GAPDH|6.0256;LDHB|8.9536;ALDOA|1.7378;IDH1|2.3335;PARK7|5.445;FABP1|14.3219;FGFR4|6.9823	16	770	159	38520	http://www.ebi.ac.uk/QuickGO/GTerm?id=GO:0032787	[]
6	6	carboxylic acid metabolic process	GO:0019752	1.55e-07	2.7e-06	17.7	1.48	12.23	-2.88385	ALB|1.2246;C3|1.4997;APOA4|15.2757;GGT1|5.2;ANXA1|0.2089;APOA1|18.8799;ACY1|17.378;PGK1|6.0256;ENO1|7.8705;TPI1|15.2757;GAPDH|6.0256;LDHB|8.9536;BHMT|13.5519;ALDOA|1.7378;ASS1|2.4889;IDH1|2.3335;PARK7|5.445;CNDP2|17.0608;FABP1|14.3219;AHCY|2.6546;CKB|3.0761;FAH|5.445;FGFR4|6.9823	23	1578	159	38520	http://www.ebi.ac.uk/QuickGO/GTerm?id=GO:0019752	[]
3	3	organic substance metabolic process	GO:0071704	1.55e-07	2.7e-06	95.1	9.41	12.23	-2.88385	ALB|1.2246;LRP2|0.4365;TF|1.2823;CUBN|0.3597;C3|1.4997;FBN1|0.207;ANPEP|12.0226;C4A|0.673;ENPEP|21.0863;SERPINA1|29.3765;MGAM|7.379;SERPINA3|19.2309;DPP4|4.7424;PSAP|7.656;A2M|7.5858;IGHG2|17.378;GAA|14.4544;EFEMP1|0.0904;APOA4|15.2757;F2|0.1009;GGT1|5.2;SERPINA5|0.2109;CDH1|0.7311;ANXA1|0.2089;SERPINC1|3.4674;APOA1|18.8799;MME|5.2481;ACY1|17.378;NAGLU|8.3946;PGK1|6.0256;ENO1|7.8705;GLB1|2.5119;H…	122	21962	159	38520	http://www.ebi.ac.uk/QuickGO/GTerm?id=GO:0071704	[]
5	5	regulation of hydrolase activity	GO:0051336	1.66e-07	2.88e-06	22.44	1.97	12.23	-2.88385	C3|1.4997;C4A|0.673;SERPINA1|29.3765;SERPINA3|19.2309;A2M|7.5858;APOA4|15.2757;SERPINA5|0.2109;ANXA1|0.2089;SERPINC1|3.4674;APOA1|18.8799;FBLN1|0.1067;SOD1|16.1436;APOH|11.9124;PEBP1|6.7298;SERPINF1|3.2509;S100A8|0.2965;SH3BGRL3|0.0461;S100A9|0.3945;PARK7|5.445;SERPINI1|4.4875;FABP1|14.3219;CST6|0.0692;ITIH1|6.9183;SPINK1|0.5012;ARHGDIA|31.3329;ECM1|7.9433	26	1979	159	38520	http://www.ebi.ac.uk/QuickGO/GTerm?id=GO:0051336	[]
5	5	cell differentiation	GO:0030154	1.71e-07	2.95e-06	36.34	3.39	12.23	-2.88385	TF|1.2823;ANPEP|12.0226;PSAP|7.656;A2M|7.5858;EFEMP1|0.0904;APOA4|15.2757;SPP1|0.1406;VASN|0.1738;F2|0.1009;CDH1|0.7311;ANXA1|0.2089;APOA1|18.8799;ROBO4|23.1206;NAGLU|8.3946;PGK1|6.0256;HSPA8|4.3251;OLFM4|0.2512;HEXB|2.729;ANXA4|3.342;FBLN1|0.1067;HEG1|0.0839;CAT|15.417;SOD1|16.1436;PVRL2|0.0887;SERPINF1|3.2509;GSTA2|18.5353;ACTN4|10.8643;MADCAM1|0.7178;EPHB4|0.6081;HSP90AA1|11.5878;DAG1|3.02;GLO…	42	4435	159	38520	http://www.ebi.ac.uk/QuickGO/GTerm?id=GO:0030154	[]
3	3	regulation of signaling	GO:0023051	1.86e-07	3.18e-06	30.71	2.82	12.23	-2.88385	TF|1.2823;C3|1.4997;FBN1|0.207;PSAP|7.656;A2M|7.5858;VASN|0.1738;F2|0.1009;APOA1|18.8799;OLFM4|0.2512;CD55|0.2535;IGFBP2|0.2754;ACPP|5.4954;FBLN1|0.1067;CAT|15.417;SOD1|16.1436;PRDX1|3.1623;HSPA1B|4.3652;S100A8|0.2965;ACTN4|10.8643;S100A9|0.3945;PARK7|5.445;GSTP1|11.8032;DAG1|3.02;FGG|3.0479;TXN|16.4437;SPINK1|0.5012;CD63|2.0893;ELANE|0.4246;SHISA5|0.2965;ACVR1B|0.1294;ARHGDIA|31.3329;LASP1|0.343…	37	3627	159	38520	http://www.ebi.ac.uk/QuickGO/GTerm?id=GO:0023051	[]
7	6,7	cellular response to hydrogen peroxide	GO:0070301	1.87e-07	3.18e-06	6.6	0.35	12.23	-2.88385	PSAP|7.656;ANXA1|0.2089;PARK7|5.445;FABP1|14.3219;TXN|16.4437;PLEKHA1|85.5067	6	60	159	38520	http://www.ebi.ac.uk/QuickGO/GTerm?id=GO:0070301	[]
5	5	regulation of response to oxidative stress	GO:1902882	1.87e-07	3.18e-06	5.51	0.24	12.23	-2.88385	PSAP|7.656;HP|6.6069;FBLN5|0.2249;SOD1|16.1436;PARK7|5.445;TXN|16.4437	6	60	159	38520	http://www.ebi.ac.uk/QuickGO/GTerm?id=GO:1902882	[]
6	5,6	positive regulation of cell-substrate adhesion	GO:0010811	2.07e-07	3.5e-06	-3.76	-0.71	12.23	-2.88385	SPP1|0.1406;APOA1|18.8799;OLFM4|0.2512;NID1|0.4093;FBLN1|0.1067;FGG|3.0479;CDC42|99.0832	7	100	159	38520	http://www.ebi.ac.uk/QuickGO/GTerm?id=GO:0010811	[]
5	4,5	regulation of cellular response to stress	GO:0080135	2.28e-07	3.83e-06	13.65	1.07	12.23	-2.88385	TF|1.2823;PSAP|7.656;HP|6.6069;SPP1|0.1406;HSPA8|4.3251;FBLN5|0.2249;SOD1|16.1436;PRDX1|3.1623;ANXA5|3.6308;PARK7|5.445;GSTP1|11.8032;FABP1|14.3219;HSP90AA1|11.5878;TXN|16.4437;MYLK|0.6427;CDC42|99.0832	16	797	159	38520	http://www.ebi.ac.uk/QuickGO/GTerm?id=GO:0080135	[]
8	8	glucose catabolic process	GO:0006007	2.43e-07	4.06e-06	3.88	0.07	12.23	-2.88385	PGK1|6.0256;ENO1|7.8705;TPI1|15.2757;GAPDH|6.0256;ALDOA|1.7378	5	33	159	38520	http://www.ebi.ac.uk/QuickGO/GTerm?id=GO:0006007	[]
9	5,7,9	regulation of angiotensin levels in blood	GO:0002002	2.71e-07	4.5e-06	3.48	0.03	12.23	-2.88385	ANPEP|12.0226;ENPEP|21.0863;MME|5.2481;ACE|2.2909	4	14	159	38520	http://www.ebi.ac.uk/QuickGO/GTerm?id=GO:0002002	[]
4	4	regulation of anatomical structure morphogenesis	GO:0022603	2.88e-07	4.77e-06	14.94	1.2	12.23	-2.88385	C3|1.4997;SPP1|0.1406;VASN|0.1738;F2|0.1009;APOA1|18.8799;OLFM4|0.2512;KLK3|4.4875;HEXB|2.729;FBLN1|0.1067;APOH|11.9124;ALDOA|1.7378;SERPINF1|3.2509;ACTN4|10.8643;DAG1|3.02;FGG|3.0479;ARHGDIA|31.3329;CDC42|99.0832;ECM1|7.9433	18	1028	159	38520	http://www.ebi.ac.uk/QuickGO/GTerm?id=GO:0022603	[]
4	4	glycosyl compound metabolic process	GO:1901657	3.04e-07	5e-06	11.28	0.83	12.23	-2.88385	PGK1|6.0256;ENO1|7.8705;HSPA8|4.3251;TPI1|15.2757;GAPDH|6.0256;ACPP|5.4954;BHMT|13.5519;ALDOA|1.7378;HSPA1B|4.3652;PARK7|5.445;AHCY|2.6546;PNP|7.7983;FUCA1|12.942;BPNT1|12.2462	14	615	159	38520	http://www.ebi.ac.uk/QuickGO/GTerm?id=GO:1901657	[]
7	7	purine ribonucleoside metabolic process	GO:0046128	3.19e-07	5.22e-06	10.17	0.71	12.23	-2.88385	PGK1|6.0256;ENO1|7.8705;HSPA8|4.3251;TPI1|15.2757;GAPDH|6.0256;ACPP|5.4954;BHMT|13.5519;ALDOA|1.7378;HSPA1B|4.3652;PARK7|5.445;AHCY|2.6546;PNP|7.7983;BPNT1|12.2462	13	525	159	38520	http://www.ebi.ac.uk/QuickGO/GTerm?id=GO:0046128	[]
7	7	glycosaminoglycan catabolic process	GO:0006027	3.33e-07	5.42e-06	3.59	0.04	12.23	-2.88385	NAGLU|8.3946;GLB1|2.5119;GNS|3.8019;HEXB|2.729;FUCA1|12.942;GUSB|0.7311	6	66	159	38520	http://www.ebi.ac.uk/QuickGO/GTerm?id=GO:0006027	[]
4	4	cell-cell adhesion	GO:0098609	3.4e-07	5.49e-06	-8.34	-1.18	12.23	-2.88385	DPP4|4.7424;APOA4|15.2757;CDH1|0.7311;ANXA1|0.2089;APOA1|18.8799;HBB|1.6904;CD55|0.2535;IGFBP2|0.2754;SOD1|16.1436;CADM4|0.1117;ASS1|2.4889;PVRL2|0.0887;S100A8|0.2965;S100A9|0.3945;MADCAM1|0.7178;FGG|3.0479;PNP|7.7983;SCGB1A1|0.3532;CDC42|99.0832	19	1155	159	38520	http://www.ebi.ac.uk/QuickGO/GTerm?id=GO:0098609	[]
6	6	purine nucleoside metabolic process	GO:0042278	3.4e-07	5.49e-06	10.17	0.71	12.23	-2.88385	PGK1|6.0256;ENO1|7.8705;HSPA8|4.3251;TPI1|15.2757;GAPDH|6.0256;ACPP|5.4954;BHMT|13.5519;ALDOA|1.7378;HSPA1B|4.3652;PARK7|5.445;AHCY|2.6546;PNP|7.7983;BPNT1|12.2462	13	528	159	38520	http://www.ebi.ac.uk/QuickGO/GTerm?id=GO:0042278	[]
6	5,6	leukocyte cell-cell adhesion	GO:0007159	3.48e-07	5.58e-06	-6.35	-0.98	12.23	-2.88385	DPP4|4.7424;APOA4|15.2757;ANXA1|0.2089;CD55|0.2535;IGFBP2|0.2754;SOD1|16.1436;ASS1|2.4889;S100A8|0.2965;S100A9|0.3945;MADCAM1|0.7178;PNP|7.7983;SCGB1A1|0.3532;CDC42|99.0832	13	529	159	38520	http://www.ebi.ac.uk/QuickGO/GTerm?id=GO:0007159	[]
6	6	regulation of angiotensin metabolic process	GO:0060177	3.68e-07	5.85e-06	3.48	0.03	12.23	-2.88385	ANPEP|12.0226;ENPEP|21.0863;MME|5.2481;ACE|2.2909	4	15	159	38520	http://www.ebi.ac.uk/QuickGO/GTerm?id=GO:0060177	[]
7	5,7	negative regulation of response to reactive oxygen species	GO:1901032	3.68e-07	5.85e-06	3.66	0.05	12.23	-2.88385	PSAP|7.656;HP|6.6069;PARK7|5.445;TXN|16.4437	4	15	159	38520	http://www.ebi.ac.uk/QuickGO/GTerm?id=GO:1901032	[]
4	4	response to xenobiotic stimulus	GO:0009410	3.86e-07	6.11e-06	8.13	0.5	12.23	-2.88385	GGT1|5.2;ACY1|17.378;GSTA2|18.5353;CNDP2|17.0608;GSTP1|11.8032;AHCY|2.6546;SCGB1A1|0.3532;AKR7A3|4.3251;BPNT1|12.2462	9	221	159	38520	http://www.ebi.ac.uk/QuickGO/GTerm?id=GO:0009410	[]
9	5,6,9	complement activation, classical pathway	GO:0006958	3.88e-07	6.11e-06	0.9	-0.24	12.23	-2.88385	C3|1.4997;C4A|0.673;IGHG2|17.378;CD55|0.2535;IGHG1|1.3062;P06314|0.1076;IGHG3|3.281;P01594|0.0614	8	161	159	38520	http://www.ebi.ac.uk/QuickGO/GTerm?id=GO:0006958	[]
4	4	leukocyte mediated immunity	GO:0002443	4.14e-07	6.48e-06	1.46	-0.18	12.23	-2.88385	C3|1.4997;C4A|0.673;IGHG2|17.378;CD55|0.2535;IGHG1|1.3062;PVRL2|0.0887;PRDX1|3.1623;P06314|0.1076;ELANE|0.4246;ACE|2.2909;IGHG3|3.281;P01594|0.0614	12	449	159	38520	http://www.ebi.ac.uk/QuickGO/GTerm?id=GO:0002443	[]
6	5,6	phagocytosis	GO:0006909	4.16e-07	6.48e-06	3.32	0.01	12.23	-2.88385	C3|1.4997;C4A|0.673;IGHG2|17.378;OLFM4|0.2512;IGHG1|1.3062;P06314|0.1076;HSP90AA1|11.5878;ELANE|0.4246;IGHG3|3.281;P01594|0.0614;CDC42|99.0832	11	367	159	38520	http://www.ebi.ac.uk/QuickGO/GTerm?id=GO:0006909	[]
3	3	leukocyte migration	GO:0050900	4.39e-07	6.81e-06	-7.97	-1.14	12.23	-2.88385	SPP1|0.1406;F2|0.1009;OLFM4|0.2512;PPIA|7.5858;S100A8|0.2965;CD177|1.9953;S100A9|0.3945;MADCAM1|0.7178;ELANE|0.4246;CDC42|99.0832;ECM1|7.9433	11	369	159	38520	http://www.ebi.ac.uk/QuickGO/GTerm?id=GO:0050900	[]
7	4,7	peptide hormone processing	GO:0016486	4.41e-07	6.81e-06	4.13	0.09	12.23	-2.88385	ANPEP|12.0226;ENPEP|21.0863;MME|5.2481;CPE|4.4055;ACE|2.2909	5	37	159	38520	http://www.ebi.ac.uk/QuickGO/GTerm?id=GO:0016486	[]
4	4	response to drug	GO:0042493	4.65e-07	7.15e-06	10.12	0.71	12.23	-2.88385	CDH1|0.7311;ANXA1|0.2089;APOA1|18.8799;IGFBP2|0.2754;CAT|15.417;SOD1|16.1436;ASS1|2.4889;SORD|1.7219;PNP|7.7983;SCGB1A1|0.3532;MMP7|0.0619;BLMH|77.983	12	454	159	38520	http://www.ebi.ac.uk/QuickGO/GTerm?id=GO:0042493	[]
6	6	monosaccharide catabolic process	GO:0046365	5.16e-07	7.88e-06	4.28	0.11	12.23	-2.88385	PGK1|6.0256;ENO1|7.8705;GLB1|2.5119;TPI1|15.2757;GAPDH|6.0256;ALDOA|1.7378	6	71	159	38520	http://www.ebi.ac.uk/QuickGO/GTerm?id=GO:0046365	[]
5	5	regulation of cell migration	GO:0030334	5.17e-07	7.88e-06	11.36	0.83	12.23	-2.88385	ROBO4|23.1206;OLFM4|0.2512;FBLN1|0.1067;APOH|11.9124;SERPINF1|3.2509;ACTN4|10.8643;SH3BGRL3|0.0461;MADCAM1|0.7178;DAG1|3.02;ACE|2.2909;ACVR1B|0.1294;ARHGDIA|31.3329;MYLK|0.6427;ECM1|7.9433	14	643	159	38520	http://www.ebi.ac.uk/QuickGO/GTerm?id=GO:0030334	[]
5	5	programmed cell death	GO:0012501	5.4e-07	8.2e-06	21.94	1.92	12.23	-2.88385	ALB|1.2246;CDH1|0.7311;ANXA1|0.2089;OLFM4|0.2512;GAPDH|6.0256;CD248|0.5297;ANXA4|3.342;PRDX2|35.6451;CAT|15.417;SOD1|16.1436;APOH|11.9124;ACP2|2.5823;LCN2|0.2051;HSPA1B|4.3652;S100A8|0.2965;ACTN4|10.8643;S100A9|0.3945;ANXA5|3.6308;PARK7|5.445;GSTP1|11.8032;DNASE1|0.1941;FABP1|14.3219;GLO1|3.1333;FGG|3.0479;SHISA5|0.2965;ACVR1B|0.1294;ARHGDIA|31.3329;CDC42|99.0832	28	2391	159	38520	http://www.ebi.ac.uk/QuickGO/GTerm?id=GO:0012501	[]
5	5	regulation of cell-substrate adhesion	GO:0010810	5.61e-07	8.47e-06	-1.98	-0.53	12.23	-2.88385	SPP1|0.1406;APOA1|18.8799;OLFM4|0.2512;NID1|0.4093;FBLN1|0.1067;ACTN4|10.8643;FGG|3.0479;CDC42|99.0832	8	169	159	38520	http://www.ebi.ac.uk/QuickGO/GTerm?id=GO:0010810	[]
6	6	ribonucleoside metabolic process	GO:0009119	6.08e-07	9.13e-06	10.17	0.71	12.23	-2.88385	PGK1|6.0256;ENO1|7.8705;HSPA8|4.3251;TPI1|15.2757;GAPDH|6.0256;ACPP|5.4954;BHMT|13.5519;ALDOA|1.7378;HSPA1B|4.3652;PARK7|5.445;AHCY|2.6546;PNP|7.7983;BPNT1|12.2462	13	556	159	38520	http://www.ebi.ac.uk/QuickGO/GTerm?id=GO:0009119	[]
4	4	organic hydroxy compound metabolic process	GO:1901615	6.1e-07	9.13e-06	11.22	0.82	12.23	-2.88385	ALB|1.2246;LRP2|0.4365;CUBN|0.3597;APOA4|15.2757;APOA1|18.8799;LDHB|8.9536;CAT|15.417;SOD1|16.1436;PARK7|5.445;SORD|1.7219;DDT|18.5353;TTR|1.9055;APOF|14.1906;FGFR4|6.9823	14	652	159	38520	http://www.ebi.ac.uk/QuickGO/GTerm?id=GO:1901615	[]
5	5	single-organism carbohydrate catabolic process	GO:0044724	6.46e-07	9.62e-06	6.11	0.3	12.23	-2.88385	GAA|14.4544;PGK1|6.0256;ENO1|7.8705;GLB1|2.5119;TPI1|15.2757;GAPDH|6.0256;HEXB|2.729;ALDOA|1.7378;SORD|1.7219	9	235	159	38520	http://www.ebi.ac.uk/QuickGO/GTerm?id=GO:0044724	[]
4	4	positive regulation of cell adhesion	GO:0045785	6.65e-07	9.87e-06	-5.32	-0.87	12.23	-2.88385	DPP4|4.7424;SPP1|0.1406;APOA1|18.8799;OLFM4|0.2512;CD55|0.2535;NID1|0.4093;IGFBP2|0.2754;FBLN1|0.1067;FGG|3.0479;PNP|7.7983;CDC42|99.0832	11	385	159	38520	http://www.ebi.ac.uk/QuickGO/GTerm?id=GO:0045785	[]
4	4	digestion	GO:0007586	6.7e-07	9.89e-06	8.4	0.53	12.23	-2.88385	ENPEP|21.0863;MGAM|7.379;SERPINA3|19.2309;APOA4|15.2757;APOA1|18.8799;PGA3|0.1138;FABP1|14.3219;ACE|2.2909	8	173	159	38520	http://www.ebi.ac.uk/QuickGO/GTerm?id=GO:0007586	[]
3	3	cellular metabolic process	GO:0044237	8.45e-07	1.23e-05	87.93	8.67	12.23	-2.88385	ALB|1.2246;LRP2|0.4365;TF|1.2823;CUBN|0.3597;C3|1.4997;FBN1|0.207;ANPEP|12.0226;C4A|0.673;ENPEP|21.0863;SERPINA1|29.3765;MGAM|7.379;SERPINA3|19.2309;PSAP|7.656;A2M|7.5858;HP|6.6069;GAA|14.4544;EFEMP1|0.0904;APOA4|15.2757;F2|0.1009;GGT1|5.2;SERPINA5|0.2109;CDH1|0.7311;ANXA1|0.2089;SERPINC1|3.4674;APOA1|18.8799;MME|5.2481;ACY1|17.378;PGK1|6.0256;ENO1|7.8705;GLB1|2.5119;HSPA8|4.3251;TPI1|15.2757;GAP…	115	20607	159	38520	http://www.ebi.ac.uk/QuickGO/GTerm?id=GO:0044237	[]
6	4,6	regulation of protein activation cascade	GO:2000257	8.46e-07	1.23e-05	0.77	-0.25	12.23	-2.88385	C3|1.4997;C4A|0.673;A2M|7.5858;SERPINC1|3.4674;CD55|0.2535	5	42	159	38520	http://www.ebi.ac.uk/QuickGO/GTerm?id=GO:2000257	[]
8	8	peptidyl-cysteine modification	GO:0018198	8.46e-07	1.23e-05	0.93	-0.23	12.23	-2.88385	GAPDH|6.0256;S100A8|0.2965;S100A9|0.3945;PARK7|5.445;ACE|2.2909	5	42	159	38520	http://www.ebi.ac.uk/QuickGO/GTerm?id=GO:0018198	[]
10	9,10	NADH metabolic process	GO:0006734	8.46e-07	1.23e-05	3.88	0.07	12.23	-2.88385	PGK1|6.0256;ENO1|7.8705;TPI1|15.2757;GAPDH|6.0256;ALDOA|1.7378	5	42	159	38520	http://www.ebi.ac.uk/QuickGO/GTerm?id=GO:0006734	[]
5	5	regulation of cell-cell adhesion	GO:0022407	8.76e-07	1.27e-05	8.67	0.56	12.23	-2.88385	DPP4|4.7424;CDH1|0.7311;APOA1|18.8799;CD55|0.2535;IGFBP2|0.2754;SOD1|16.1436;ASS1|2.4889;FGG|3.0479;PNP|7.7983;SCGB1A1|0.3532;CDC42|99.0832	11	396	159	38520	http://www.ebi.ac.uk/QuickGO/GTerm?id=GO:0022407	[]
6	6	regulation of cell morphogenesis involved in differentiation	GO:0010769	8.94e-07	1.29e-05	9.95	0.69	12.23	-2.88385	SPP1|0.1406;VASN|0.1738;APOA1|18.8799;OLFM4|0.2512;FBLN1|0.1067;ACTN4|10.8643;DAG1|3.02;FGG|3.0479;ARHGDIA|31.3329;CDC42|99.0832	10	317	159	38520	http://www.ebi.ac.uk/QuickGO/GTerm?id=GO:0010769	[]
6	5,6	regulation of lipid biosynthetic process	GO:0046890	8.98e-07	1.29e-05	5.74	0.26	12.23	-2.88385	C3|1.4997;APOA4|15.2757;ANXA1|0.2089;APOA1|18.8799;SOD1|16.1436;IDH1|2.3335;FGFR4|6.9823	7	124	159	38520	http://www.ebi.ac.uk/QuickGO/GTerm?id=GO:0046890	[]
7	6,7	viral entry into host cell	GO:0046718	9.04e-07	1.29e-05	4.52	0.14	12.23	-2.88385	ANPEP|12.0226;DPP4|4.7424;CD55|0.2535;PVRL2|0.0887;HSPA1B|4.3652;DAG1|3.02	6	78	159	38520	http://www.ebi.ac.uk/QuickGO/GTerm?id=GO:0046718	[]
8	5,8	humoral immune response mediated by circulating immunoglobulin	GO:0002455	9.42e-07	1.34e-05	0.9	-0.24	12.23	-2.88385	C3|1.4997;C4A|0.673;IGHG2|17.378;CD55|0.2535;IGHG1|1.3062;P06314|0.1076;IGHG3|3.281;P01594|0.0614	8	181	159	38520	http://www.ebi.ac.uk/QuickGO/GTerm?id=GO:0002455	[]
5	4,5	regulation of cytokine production	GO:0001817	9.55e-07	1.35e-05	4.1	0.09	12.23	-2.88385	C3|1.4997;ANXA1|0.2089;APOA1|18.8799;ANXA4|3.342;FBLN1|0.1067;HEG1|0.0839;SOD1|16.1436;HSPA1B|4.3652;PARK7|5.445;GSTP1|11.8032;PRG4|0.2831;SCGB1A1|0.3532;ELANE|0.4246	13	579	159	38520	http://www.ebi.ac.uk/QuickGO/GTerm?id=GO:0001817	[]
6	6	regulation of superoxide metabolic process	GO:0090322	1.03e-06	1.45e-05	3.66	0.05	12.23	-2.88385	FBLN5|0.2249;SOD1|16.1436;PARK7|5.445;GSTP1|11.8032	4	19	159	38520	http://www.ebi.ac.uk/QuickGO/GTerm?id=GO:0090322	[]
4	3,4	maintenance of location	GO:0051235	1.06e-06	1.48e-05	6.23	0.31	12.23	-2.88385	ALB|1.2246;C3|1.4997;FBN1|0.207;GAA|14.4544;F2|0.1009;APOA1|18.8799;HEXB|2.729;S100A8|0.2965;S100A9|0.3945;DAG1|3.02	10	323	159	38520	http://www.ebi.ac.uk/QuickGO/GTerm?id=GO:0051235	[]
6	6	regulation of wound healing	GO:0061041	1.11e-06	1.55e-05	1.59	-0.17	12.23	-2.88385	F2|0.1009;SERPINC1|3.4674;APOH|11.9124;S100A9|0.3945;ANXA5|3.6308;FGG|3.0479;MYLK|0.6427	7	128	159	38520	http://www.ebi.ac.uk/QuickGO/GTerm?id=GO:0061041	[]
7	7	immunoglobulin mediated immune response	GO:0016064	1.15e-06	1.6e-05	-2.05	-0.54	12.23	-2.88385	C3|1.4997;C4A|0.673;IGHG2|17.378;CD55|0.2535;IGHG1|1.3062;PVRL2|0.0887;P06314|0.1076;IGHG3|3.281;P01594|0.0614	9	252	159	38520	http://www.ebi.ac.uk/QuickGO/GTerm?id=GO:0016064	[]
3	2,3	regulation of biological process	GO:0050789	1.19e-06	1.65e-05	83.33	8.2	12.23	-2.88385	ALB|1.2246;LRP2|0.4365;TF|1.2823;C3|1.4997;PIGR|0.7586;FBN1|0.207;ANPEP|12.0226;C4A|0.673;ENPEP|21.0863;SERPINA1|29.3765;SERPINA3|19.2309;DPP4|4.7424;PSAP|7.656;A2M|7.5858;HP|6.6069;IGHG2|17.378;GAA|14.4544;EFEMP1|0.0904;APOA4|15.2757;SPP1|0.1406;VASN|0.1738;F2|0.1009;GGT1|5.2;SERPINA5|0.2109;CDH1|0.7311;ANXA1|0.2089;IGFBP7|0.0655;SERPINC1|3.4674;APOA1|18.8799;MME|5.2481;ROBO4|23.1206;ENO1|7.8705…	109	19171	159	38520	http://www.ebi.ac.uk/QuickGO/GTerm?id=GO:0050789	[]
4	4	cellular lipid metabolic process	GO:0044255	1.21e-06	1.67e-05	16.21	1.33	12.23	-2.88385	LRP2|0.4365;C3|1.4997;PSAP|7.656;APOA4|15.2757;GGT1|5.2;ANXA1|0.2089;APOA1|18.8799;GLB1|2.5119;ARSA|15.8489;HEXB|2.729;ASAH1|4.9204;CAT|15.417;APOH|11.9124;IDH1|2.3335;PRDX6|6.9183;FABP1|14.3219;TTR|1.9055;CPNE3|1.6293;BPNT1|12.2462;CDC42|99.0832	20	1383	159	38520	http://www.ebi.ac.uk/QuickGO/GTerm?id=GO:0044255	[]
5	4,5	substrate adhesion-dependent cell spreading	GO:0034446	1.22e-06	1.67e-05	6.36	0.32	12.23	-2.88385	APOA1|18.8799;OLFM4|0.2512;FBLN1|0.1067;ACTN4|10.8643;FGG|3.0479;CDC42|99.0832	6	82	159	38520	http://www.ebi.ac.uk/QuickGO/GTerm?id=GO:0034446	[]
6	6	B cell mediated immunity	GO:0019724	1.27e-06	1.74e-05	-2.05	-0.54	12.23	-2.88385	C3|1.4997;C4A|0.673;IGHG2|17.378;CD55|0.2535;IGHG1|1.3062;PVRL2|0.0887;P06314|0.1076;IGHG3|3.281;P01594|0.0614	9	255	159	38520	http://www.ebi.ac.uk/QuickGO/GTerm?id=GO:0019724	[]
5	5	steroid metabolic process	GO:0008202	1.28e-06	1.74e-05	9.68	0.66	12.23	-2.88385	ALB|1.2246;LRP2|0.4365;CUBN|0.3597;APOA4|15.2757;APOA1|18.8799;CAT|15.417;SOD1|16.1436;APOF|14.1906;FGFR4|6.9823;PLEKHA1|85.5067	10	330	159	38520	http://www.ebi.ac.uk/QuickGO/GTerm?id=GO:0008202	[]
8	8	regulation of systemic arterial blood pressure by circulatory renin-angiotensin	GO:0001991	1.29e-06	1.74e-05	3.48	0.03	12.23	-2.88385	ANPEP|12.0226;ENPEP|21.0863;MME|5.2481;ACE|2.2909	4	20	159	38520	http://www.ebi.ac.uk/QuickGO/GTerm?id=GO:0001991	[]
7	4,5,6,7	blood coagulation, intrinsic pathway	GO:0007597	1.29e-06	1.74e-05	3.49	0.03	12.23	-2.88385	A2M|7.5858;F2|0.1009;SERPINC1|3.4674;APOH|11.9124	4	20	159	38520	http://www.ebi.ac.uk/QuickGO/GTerm?id=GO:0007597	[]
5	5	nucleoside metabolic process	GO:0009116	1.29e-06	1.74e-05	10.17	0.71	12.23	-2.88385	PGK1|6.0256;ENO1|7.8705;HSPA8|4.3251;TPI1|15.2757;GAPDH|6.0256;ACPP|5.4954;BHMT|13.5519;ALDOA|1.7378;HSPA1B|4.3652;PARK7|5.445;AHCY|2.6546;PNP|7.7983;BPNT1|12.2462	13	595	159	38520	http://www.ebi.ac.uk/QuickGO/GTerm?id=GO:0009116	[]
4	4	cellular developmental process	GO:0048869	1.34e-06	1.79e-05	36.58	3.42	12.23	-2.88385	TF|1.2823;ANPEP|12.0226;PSAP|7.656;A2M|7.5858;EFEMP1|0.0904;APOA4|15.2757;SPP1|0.1406;VASN|0.1738;F2|0.1009;CDH1|0.7311;ANXA1|0.2089;APOA1|18.8799;ROBO4|23.1206;NAGLU|8.3946;PGK1|6.0256;HSPA8|4.3251;OLFM4|0.2512;HEXB|2.729;ANXA4|3.342;FBLN1|0.1067;HEG1|0.0839;CAT|15.417;SOD1|16.1436;ALDOA|1.7378;PVRL2|0.0887;SERPINF1|3.2509;GSTA2|18.5353;ACTN4|10.8643;MADCAM1|0.7178;EPHB4|0.6081;HSP90AA1|11.5878;…	43	4963	159	38520	http://www.ebi.ac.uk/QuickGO/GTerm?id=GO:0048869	[]
5	5	urogenital system development	GO:0001655	1.36e-06	1.81e-05	7.14	0.4	12.23	-2.88385	FBN1|0.207;ENPEP|21.0863;PSAP|7.656;ANXA1|0.2089;MME|5.2481;NID1|0.4093;CAT|15.417;ASS1|2.4889;SERPINF1|3.2509;ACE|2.2909	10	332	159	38520	http://www.ebi.ac.uk/QuickGO/GTerm?id=GO:0001655	[]
5	5	response to nutrient levels	GO:0031667	1.4e-06	1.86e-05	10.62	0.76	12.23	-2.88385	ALB|1.2246;SPP1|0.1406;SERPINC1|3.4674;APOA1|18.8799;IGFBP2|0.2754;CAT|15.417;SOD1|16.1436;ASS1|2.4889;ANXA5|3.6308;PARK7|5.445;SORD|1.7219;FABP1|14.3219;AHCY|2.6546;MYLK|0.6427;MMP7|0.0619	15	805	159	38520	http://www.ebi.ac.uk/QuickGO/GTerm?id=GO:0031667	[]
5	4,5	multicellular organismal homeostasis	GO:0048871	1.43e-06	1.89e-05	5.38	0.22	12.23	-2.88385	ALB|1.2246;TF|1.2823;CUBN|0.3597;PIGR|0.7586;SERPINA3|19.2309;SPP1|0.1406;SOD1|16.1436;PRDX1|3.1623;LYZ|0.5445;IGHG3|3.281	10	334	159	38520	http://www.ebi.ac.uk/QuickGO/GTerm?id=GO:0048871	[]
6	6	apoptotic process	GO:0006915	1.43e-06	1.89e-05	21.53	1.88	12.23	-2.88385	ALB|1.2246;CDH1|0.7311;ANXA1|0.2089;OLFM4|0.2512;GAPDH|6.0256;CD248|0.5297;ANXA4|3.342;PRDX2|35.6451;CAT|15.417;SOD1|16.1436;APOH|11.9124;LCN2|0.2051;HSPA1B|4.3652;S100A8|0.2965;ACTN4|10.8643;S100A9|0.3945;ANXA5|3.6308;PARK7|5.445;GSTP1|11.8032;DNASE1|0.1941;FABP1|14.3219;GLO1|3.1333;FGG|3.0479;SHISA5|0.2965;ACVR1B|0.1294;ARHGDIA|31.3329;CDC42|99.0832	27	2364	159	38520	http://www.ebi.ac.uk/QuickGO/GTerm?id=GO:0006915	[]
5	5	regulation of cell morphogenesis	GO:0022604	1.47e-06	1.93e-05	11.62	0.86	12.23	-2.88385	SPP1|0.1406;VASN|0.1738;F2|0.1009;APOA1|18.8799;OLFM4|0.2512;HEXB|2.729;FBLN1|0.1067;ALDOA|1.7378;ACTN4|10.8643;DAG1|3.02;FGG|3.0479;ARHGDIA|31.3329;CDC42|99.0832	13	602	159	38520	http://www.ebi.ac.uk/QuickGO/GTerm?id=GO:0022604	[]
3	3	single organism reproductive process	GO:0044702	1.53e-06	1.99e-05	-0.07	-0.34	12.23	-2.88385	PSAP|7.656;SPP1|0.1406;GGT1|5.2;SERPINA5|0.2109;ANXA1|0.2089;HEXB|2.729;FBLN1|0.1067;SOD1|16.1436;PVRL2|0.0887;IDH1|2.3335;SERPINF1|3.2509;PARK7|5.445;SCGB1A1|0.3532;SPINK1|0.5012;ACE|2.2909;ACVR1B|0.1294;MMP7|0.0619;PLEKHA1|85.5067	18	1155	159	38520	http://www.ebi.ac.uk/QuickGO/GTerm?id=GO:0044702	[]
7	7	receptor-mediated endocytosis	GO:0006898	1.57e-06	2.04e-05	7.54	0.44	12.23	-2.88385	ALB|1.2246;LRP2|0.4365;CUBN|0.3597;HP|6.6069;APOA1|18.8799;HBB|1.6904;HBA1|1.6144;P06314|0.1076;PRG4|0.2831;HSP90AA1|11.5878;CD63|2.0893;P01594|0.0614	12	510	159	38520	http://www.ebi.ac.uk/QuickGO/GTerm?id=GO:0006898	[]
8	5,6,7,8	positive regulation of G-protein coupled receptor protein signaling pathway	GO:0045745	1.58e-06	2.06e-05	2.03	-0.12	12.23	-2.88385	C3|1.4997;F2|0.1009;ACPP|5.4954;KLK6|0.0113	4	21	159	38520	http://www.ebi.ac.uk/QuickGO/GTerm?id=GO:0045745	[]
5	5	multicellular organismal catabolic process	GO:0044243	1.61e-06	2.08e-05	0.66	-0.26	12.23	-2.88385	ENPEP|21.0863;APOA4|15.2757;ELANE|0.4246;ACE|2.2909;MMP7|0.0619;KLK6|0.0113	6	86	159	38520	http://www.ebi.ac.uk/QuickGO/GTerm?id=GO:0044243	[]
4	4	carbohydrate derivative metabolic process	GO:1901135	1.72e-06	2.22e-05	17.73	1.49	12.23	-2.88385	LRP2|0.4365;PSAP|7.656;NAGLU|8.3946;PGK1|6.0256;ENO1|7.8705;GLB1|2.5119;HSPA8|4.3251;TPI1|15.2757;GAPDH|6.0256;GNS|3.8019;ACPP|5.4954;ARSA|15.8489;HEXB|2.729;ASAH1|4.9204;BHMT|13.5519;ALDOA|1.7378;HSPA1B|4.3652;PARK7|5.445;AHCY|2.6546;PNP|7.7983;ITIH1|6.9183;FUCA1|12.942;GUSB|0.7311;BPNT1|12.2462	24	1954	159	38520	http://www.ebi.ac.uk/QuickGO/GTerm?id=GO:1901135	[]
2	2	reproductive process	GO:0022414	1.99e-06	2.55e-05	-7.15	-1.06	12.23	-2.88385	PSAP|7.656;SPP1|0.1406;GGT1|5.2;SERPINA5|0.2109;ANXA1|0.2089;IGFBP2|0.2754;HEXB|2.729;FBLN1|0.1067;SOD1|16.1436;PVRL2|0.0887;IDH1|2.3335;SERPINF1|3.2509;PARK7|5.445;SCGB1A1|0.3532;SPINK1|0.5012;ACE|2.2909;ACVR1B|0.1294;MMP7|0.0619;PLEKHA1|85.5067	19	1301	159	38520	http://www.ebi.ac.uk/QuickGO/GTerm?id=GO:0022414	[]
4	4	multicellular organismal metabolic process	GO:0044236	2.03e-06	2.59e-05	-2.87	-0.62	12.23	-2.88385	ENPEP|21.0863;APOA4|15.2757;F2|0.1009;ELANE|0.4246;ACE|2.2909;MMP7|0.0619;KLK6|0.0113	7	140	159	38520	http://www.ebi.ac.uk/QuickGO/GTerm?id=GO:0044236	[]
5	5	sulfur compound catabolic process	GO:0044273	2.05e-06	2.61e-05	2.56	-0.07	12.23	-2.88385	GGT1|5.2;GLB1|2.5119;GNS|3.8019;HEXB|2.729;AHCY|2.6546	5	50	159	38520	http://www.ebi.ac.uk/QuickGO/GTerm?id=GO:0044273	[]
6	4,6	regulation of hemostasis	GO:1900046	2.1e-06	2.66e-05	4.06	0.09	12.23	-2.88385	F2|0.1009;SERPINC1|3.4674;APOH|11.9124;S100A9|0.3945;ANXA5|3.6308;FGG|3.0479	6	90	159	38520	http://www.ebi.ac.uk/QuickGO/GTerm?id=GO:1900046	[]
7	5,6,7	regulation of blood coagulation	GO:0030193	2.1e-06	2.66e-05	4.06	0.09	12.23	-2.88385	F2|0.1009;SERPINC1|3.4674;APOH|11.9124;S100A9|0.3945;ANXA5|3.6308;FGG|3.0479	6	90	159	38520	http://www.ebi.ac.uk/QuickGO/GTerm?id=GO:0030193	[]
3	3	establishment of localization	GO:0051234	2.14e-06	2.69e-05	45.32	4.31	12.23	-2.88385	ALB|1.2246;LRP2|0.4365;TF|1.2823;CUBN|0.3597;C3|1.4997;PIGR|0.7586;C4A|0.673;SERPINA1|29.3765;PSAP|7.656;A2M|7.5858;HP|6.6069;IGHG2|17.378;APOA4|15.2757;F2|0.1009;SERPINA5|0.2109;CDH1|0.7311;ANXA1|0.2089;APOA1|18.8799;HSPA8|4.3251;OLFM4|0.2512;HBB|1.6904;AFM|8.6298;CA1|26.3027;FBLN5|0.2249;ANXA4|3.342;FBLN1|0.1067;IGHG1|1.3062;SOD1|16.1436;APOH|11.9124;ALDOA|1.7378;PPIA|7.5858;HBA1|1.6144;PVRL2|0…	62	8676	159	38520	http://www.ebi.ac.uk/QuickGO/GTerm?id=GO:0051234	[]
4	4	response to extracellular stimulus	GO:0009991	2.19e-06	2.74e-05	10.62	0.76	12.23	-2.88385	ALB|1.2246;SPP1|0.1406;SERPINC1|3.4674;APOA1|18.8799;IGFBP2|0.2754;CAT|15.417;SOD1|16.1436;ASS1|2.4889;ANXA5|3.6308;PARK7|5.445;SORD|1.7219;FABP1|14.3219;AHCY|2.6546;MYLK|0.6427;MMP7|0.0619	15	835	159	38520	http://www.ebi.ac.uk/QuickGO/GTerm?id=GO:0009991	[]
5	4,5	embryo implantation	GO:0007566	2.27e-06	2.83e-05	-4.37	-0.78	12.23	-2.88385	SPP1|0.1406;FBLN1|0.1067;SOD1|16.1436;SCGB1A1|0.3532;ACVR1B|0.1294	5	51	159	38520	http://www.ebi.ac.uk/QuickGO/GTerm?id=GO:0007566	[]
6	4,6	xenobiotic metabolic process	GO:0006805	2.31e-06	2.87e-05	7.68	0.46	12.23	-2.88385	GGT1|5.2;ACY1|17.378;GSTA2|18.5353;CNDP2|17.0608;GSTP1|11.8032;AHCY|2.6546;AKR7A3|4.3251;BPNT1|12.2462	8	204	159	38520	http://www.ebi.ac.uk/QuickGO/GTerm?id=GO:0006805	[]
5	5	peptide catabolic process	GO:0043171	2.33e-06	2.89e-05	3.48	0.03	12.23	-2.88385	ANPEP|12.0226;ENPEP|21.0863;GGT1|5.2;ACE|2.2909	4	23	159	38520	http://www.ebi.ac.uk/QuickGO/GTerm?id=GO:0043171	[]
4	4	lipid localization	GO:0010876	2.42e-06	2.99e-05	9.14	0.61	12.23	-2.88385	ALB|1.2246;C3|1.4997;PSAP|7.656;APOA4|15.2757;SERPINA5|0.2109;ANXA1|0.2089;APOA1|18.8799;HEXB|2.729;APOH|11.9124;FABP1|14.3219;ACE|2.2909;APOF|14.1906	12	532	159	38520	http://www.ebi.ac.uk/QuickGO/GTerm?id=GO:0010876	[]
3	3	response to biotic stimulus	GO:0009607	2.62e-06	3.22e-05	-10.62	-1.41	12.23	-2.88385	HP|6.6069;ENO1|7.8705;CD55|0.2535;KLK3|4.4875;ASS1|2.4889;PVRL2|0.0887;S100A8|0.2965;LYZ|0.5445;S100A9|0.3945;ANXA5|3.6308;GSTP1|11.8032;FABP1|14.3219;SCGB1A1|0.3532;ELANE|0.4246;MYLK|0.6427;MMP7|0.0619	16	961	159	38520	http://www.ebi.ac.uk/QuickGO/GTerm?id=GO:0009607	[]
5	5	cellular response to xenobiotic stimulus	GO:0071466	2.66e-06	3.27e-05	7.68	0.46	12.23	-2.88385	GGT1|5.2;ACY1|17.378;GSTA2|18.5353;CNDP2|17.0608;GSTP1|11.8032;AHCY|2.6546;AKR7A3|4.3251;BPNT1|12.2462	8	208	159	38520	http://www.ebi.ac.uk/QuickGO/GTerm?id=GO:0071466	[]
7	7	acute-phase response	GO:0006953	2.75e-06	3.36e-05	4.96	0.18	12.23	-2.88385	SERPINA1|29.3765;SERPINA3|19.2309;HP|6.6069;F2|0.1009;ASS1|2.4889	5	53	159	38520	http://www.ebi.ac.uk/QuickGO/GTerm?id=GO:0006953	[]
3	3	primary metabolic process	GO:0044238	3.2e-06	3.89e-05	90.22	8.91	12.23	-2.88385	ALB|1.2246;LRP2|0.4365;TF|1.2823;CUBN|0.3597;C3|1.4997;FBN1|0.207;ANPEP|12.0226;C4A|0.673;ENPEP|21.0863;SERPINA1|29.3765;MGAM|7.379;SERPINA3|19.2309;DPP4|4.7424;PSAP|7.656;A2M|7.5858;IGHG2|17.378;GAA|14.4544;EFEMP1|0.0904;APOA4|15.2757;F2|0.1009;GGT1|5.2;SERPINA5|0.2109;CDH1|0.7311;ANXA1|0.2089;SERPINC1|3.4674;APOA1|18.8799;MME|5.2481;ACY1|17.378;NAGLU|8.3946;PGK1|6.0256;ENO1|7.8705;GLB1|2.5119;H…	116	21295	159	38520	http://www.ebi.ac.uk/QuickGO/GTerm?id=GO:0044238	[]
5	4,5	regulation of coagulation	GO:0050818	3.26e-06	3.95e-05	4.06	0.09	12.23	-2.88385	F2|0.1009;SERPINC1|3.4674;APOH|11.9124;S100A9|0.3945;ANXA5|3.6308;FGG|3.0479	6	97	159	38520	http://www.ebi.ac.uk/QuickGO/GTerm?id=GO:0050818	[]
3	3	hormone metabolic process	GO:0042445	3.29e-06	3.97e-05	8.29	0.52	12.23	-2.88385	ANPEP|12.0226;ENPEP|21.0863;MME|5.2481;CPE|4.4055;TTR|1.9055;ACE|2.2909;PLEKHA1|85.5067;KLK6|0.0113	8	214	159	38520	http://www.ebi.ac.uk/QuickGO/GTerm?id=GO:0042445	[]
5	4,5	negative regulation of cytokine production	GO:0001818	3.52e-06	4.24e-05	-5.9	-0.93	12.23	-2.88385	ANXA1|0.2089;APOA1|18.8799;ANXA4|3.342;FBLN1|0.1067;GSTP1|11.8032;PRG4|0.2831;SCGB1A1|0.3532;ELANE|0.4246	8	216	159	38520	http://www.ebi.ac.uk/QuickGO/GTerm?id=GO:0001818	[]
4	4	blood vessel morphogenesis	GO:0048514	3.72e-06	4.47e-05	10.56	0.75	12.23	-2.88385	C3|1.4997;ANPEP|12.0226;ENPEP|21.0863;ROBO4|23.1206;KLK3|4.4875;HEG1|0.0839;APOH|11.9124;SERPINF1|3.2509;EPHB4|0.6081;MYLK|0.6427;CDC42|99.0832;ECM1|7.9433	12	555	159	38520	http://www.ebi.ac.uk/QuickGO/GTerm?id=GO:0048514	[]
3	3	regulation of growth	GO:0040008	3.75e-06	4.48e-05	-9.16	-1.27	12.23	-2.88385	C3|1.4997;SPP1|0.1406;F2|0.1009;IGFBP7|0.0655;ENO1|7.8705;FBLN5|0.2249;IGFBP2|0.2754;SOD1|16.1436;S100A8|0.2965;NOV|2.8054;S100A9|0.3945;ELANE|0.4246;ACVR1B|0.1294	13	656	159	38520	http://www.ebi.ac.uk/QuickGO/GTerm?id=GO:0040008	[]
5	5	lymphocyte mediated immunity	GO:0002449	3.82e-06	4.55e-05	1.45	-0.18	12.23	-2.88385	C3|1.4997;C4A|0.673;IGHG2|17.378;CD55|0.2535;IGHG1|1.3062;PVRL2|0.0887;PRDX1|3.1623;P06314|0.1076;IGHG3|3.281;P01594|0.0614	10	373	159	38520	http://www.ebi.ac.uk/QuickGO/GTerm?id=GO:0002449	[]
4	4	positive regulation of immune response	GO:0050778	3.85e-06	4.57e-05	12.93	1	12.23	-2.88385	C3|1.4997;C4A|0.673;A2M|7.5858;IGHG2|17.378;CD55|0.2535;IGHG1|1.3062;PVRL2|0.0887;HSPA1B|4.3652;P06314|0.1076;HSP90AA1|11.5878;ELANE|0.4246;IGHG3|3.281;P01594|0.0614;PLEKHA1|85.5067;CDC42|99.0832	15	875	159	38520	http://www.ebi.ac.uk/QuickGO/GTerm?id=GO:0050778	[]
6	6	aminoglycan catabolic process	GO:0006026	3.89e-06	4.6e-05	3.59	0.04	12.23	-2.88385	NAGLU|8.3946;GLB1|2.5119;GNS|3.8019;HEXB|2.729;FUCA1|12.942;GUSB|0.7311	6	100	159	38520	http://www.ebi.ac.uk/QuickGO/GTerm?id=GO:0006026	[]
6	5,6	regulation of interleukin-8 production	GO:0032677	4.32e-06	5.09e-05	1.05	-0.22	12.23	-2.88385	ANXA1|0.2089;ANXA4|3.342;HSPA1B|4.3652;PARK7|5.445;ELANE|0.4246	5	58	159	38520	http://www.ebi.ac.uk/QuickGO/GTerm?id=GO:0032677	[]
6	5,6	homotypic cell-cell adhesion	GO:0034109	4.54e-06	5.31e-05	-2.26	-0.56	12.23	-2.88385	DPP4|4.7424;ANXA1|0.2089;HBB|1.6904;CD55|0.2535;IGFBP2|0.2754;SOD1|16.1436;S100A8|0.2965;S100A9|0.3945;FGG|3.0479;PNP|7.7983;SCGB1A1|0.3532;CDC42|99.0832	12	566	159	38520	http://www.ebi.ac.uk/QuickGO/GTerm?id=GO:0034109	[]
4	4	glutathione derivative metabolic process	GO:1901685	4.56e-06	5.31e-05	4.29	0.11	12.23	-2.88385	GGT1|5.2;GSTA2|18.5353;CNDP2|17.0608;GSTP1|11.8032	4	27	159	38520	http://www.ebi.ac.uk/QuickGO/GTerm?id=GO:1901685	[]
5	5	glutathione derivative biosynthetic process	GO:1901687	4.56e-06	5.31e-05	4.29	0.11	12.23	-2.88385	GGT1|5.2;GSTA2|18.5353;CNDP2|17.0608;GSTP1|11.8032	4	27	159	38520	http://www.ebi.ac.uk/QuickGO/GTerm?id=GO:1901687	[]
7	5,6,7	positive regulation of substrate adhesion-dependent cell spreading	GO:1900026	5.3e-06	6.13e-05	4.36	0.12	12.23	-2.88385	APOA1|18.8799;OLFM4|0.2512;FGG|3.0479;CDC42|99.0832	4	28	159	38520	http://www.ebi.ac.uk/QuickGO/GTerm?id=GO:1900026	[]
7	7	regulation of systemic arterial blood pressure by renin-angiotensin	GO:0003081	5.3e-06	6.13e-05	3.48	0.03	12.23	-2.88385	ANPEP|12.0226;ENPEP|21.0863;MME|5.2481;ACE|2.2909	4	28	159	38520	http://www.ebi.ac.uk/QuickGO/GTerm?id=GO:0003081	[]
4	4	regulation of cell growth	GO:0001558	5.4e-06	6.23e-05	-7.4	-1.09	12.23	-2.88385	SPP1|0.1406;F2|0.1009;IGFBP7|0.0655;ENO1|7.8705;FBLN5|0.2249;IGFBP2|0.2754;S100A8|0.2965;NOV|2.8054;S100A9|0.3945;ACVR1B|0.1294	10	388	159	38520	http://www.ebi.ac.uk/QuickGO/GTerm?id=GO:0001558	[]
5	5	interleukin-8 production	GO:0032637	6.02e-06	6.92e-05	1.05	-0.22	12.23	-2.88385	ANXA1|0.2089;ANXA4|3.342;HSPA1B|4.3652;PARK7|5.445;ELANE|0.4246	5	62	159	38520	http://www.ebi.ac.uk/QuickGO/GTerm?id=GO:0032637	[]
4	4	transport	GO:0006810	6.27e-06	7.18e-05	42.34	4.01	12.23	-2.88385	ALB|1.2246;LRP2|0.4365;TF|1.2823;CUBN|0.3597;C3|1.4997;PIGR|0.7586;C4A|0.673;SERPINA1|29.3765;PSAP|7.656;A2M|7.5858;HP|6.6069;IGHG2|17.378;APOA4|15.2757;F2|0.1009;SERPINA5|0.2109;CDH1|0.7311;ANXA1|0.2089;APOA1|18.8799;HSPA8|4.3251;OLFM4|0.2512;HBB|1.6904;AFM|8.6298;CA1|26.3027;FBLN5|0.2249;ANXA4|3.342;FBLN1|0.1067;IGHG1|1.3062;SOD1|16.1436;APOH|11.9124;ALDOA|1.7378;PPIA|7.5858;HBA1|1.6144;PRDX1|3…	60	8544	159	38520	http://www.ebi.ac.uk/QuickGO/GTerm?id=GO:0006810	[]
4	4	response to external biotic stimulus	GO:0043207	6.48e-06	7.38e-05	-5.55	-0.9	12.23	-2.88385	HP|6.6069;ENO1|7.8705;CD55|0.2535;KLK3|4.4875;ASS1|2.4889;S100A8|0.2965;LYZ|0.5445;S100A9|0.3945;ANXA5|3.6308;GSTP1|11.8032;FABP1|14.3219;SCGB1A1|0.3532;ELANE|0.4246;MYLK|0.6427;MMP7|0.0619	15	914	159	38520	http://www.ebi.ac.uk/QuickGO/GTerm?id=GO:0043207	[]
5	3,5	response to other organism	GO:0051707	6.48e-06	7.38e-05	-5.55	-0.9	12.23	-2.88385	HP|6.6069;ENO1|7.8705;CD55|0.2535;KLK3|4.4875;ASS1|2.4889;S100A8|0.2965;LYZ|0.5445;S100A9|0.3945;ANXA5|3.6308;GSTP1|11.8032;FABP1|14.3219;SCGB1A1|0.3532;ELANE|0.4246;MYLK|0.6427;MMP7|0.0619	15	914	159	38520	http://www.ebi.ac.uk/QuickGO/GTerm?id=GO:0051707	[]
4	4	single-organism biosynthetic process	GO:0044711	6.59e-06	7.47e-05	20.63	1.78	12.23	-2.88385	C3|1.4997;APOA4|15.2757;F2|0.1009;GGT1|5.2;ANXA1|0.2089;APOA1|18.8799;PGK1|6.0256;ENO1|7.8705;TPI1|15.2757;GAPDH|6.0256;HEXB|2.729;SOD1|16.1436;BHMT|13.5519;ALDOA|1.7378;ASS1|2.4889;IDH1|2.3335;GSTA2|18.5353;PARK7|5.445;CNDP2|17.0608;GSTP1|11.8032;SORD|1.7219;DDT|18.5353;AHCY|2.6546;PNP|7.7983;CPNE3|1.6293;FGFR4|6.9823	26	2413	159	38520	http://www.ebi.ac.uk/QuickGO/GTerm?id=GO:0044711	[]
3	3	multi-multicellular organism process	GO:0044706	6.75e-06	7.62e-05	-6.58	-1	12.23	-2.88385	SPP1|0.1406;IGFBP2|0.2754;HEXB|2.729;FBLN1|0.1067;SOD1|16.1436;SCGB1A1|0.3532;ACVR1B|0.1294;MMP7|0.0619	8	236	159	38520	http://www.ebi.ac.uk/QuickGO/GTerm?id=GO:0044706	[]
8	5,7,8	exocytosis	GO:0006887	7.63e-06	8.59e-05	9.17	0.61	12.23	-2.88385	ALB|1.2246;TF|1.2823;SERPINA1|29.3765;PSAP|7.656;A2M|7.5858;APOA1|18.8799;SOD1|16.1436;ALDOA|1.7378;PPIA|7.5858;ACTN4|10.8643;FGG|3.0479;SPINK1|0.5012;CD63|2.0893	13	701	159	38520	http://www.ebi.ac.uk/QuickGO/GTerm?id=GO:0006887	[]
3	3	regulation of cellular process	GO:0050794	7.79e-06	8.74e-05	77.26	7.58	12.23	-2.88385	ALB|1.2246;LRP2|0.4365;TF|1.2823;C3|1.4997;PIGR|0.7586;FBN1|0.207;C4A|0.673;SERPINA1|29.3765;SERPINA3|19.2309;DPP4|4.7424;PSAP|7.656;A2M|7.5858;HP|6.6069;IGHG2|17.378;EFEMP1|0.0904;APOA4|15.2757;SPP1|0.1406;VASN|0.1738;F2|0.1009;SERPINA5|0.2109;CDH1|0.7311;ANXA1|0.2089;IGFBP7|0.0655;SERPINC1|3.4674;APOA1|18.8799;ROBO4|23.1206;ENO1|7.8705;HSPA8|4.3251;OLFM4|0.2512;GAPDH|6.0256;HBB|1.6904;CD55|0.25…	103	18280	159	38520	http://www.ebi.ac.uk/QuickGO/GTerm?id=GO:0050794	[]
7	6,7	negative regulation of apoptotic process	GO:0043066	8.17e-06	9.14e-05	12.96	1	12.23	-2.88385	ALB|1.2246;ANXA1|0.2089;ANXA4|3.342;PRDX2|35.6451;CAT|15.417;SOD1|16.1436;APOH|11.9124;HSPA1B|4.3652;ANXA5|3.6308;PARK7|5.445;GSTP1|11.8032;FABP1|14.3219;GLO1|3.1333;FGG|3.0479;ARHGDIA|31.3329	15	932	159	38520	http://www.ebi.ac.uk/QuickGO/GTerm?id=GO:0043066	[]
6	4,6	response to bacterium	GO:0009617	8.6e-06	9.59e-05	-6.76	-1.02	12.23	-2.88385	HP|6.6069;CD55|0.2535;KLK3|4.4875;ASS1|2.4889;S100A8|0.2965;LYZ|0.5445;S100A9|0.3945;GSTP1|11.8032;SCGB1A1|0.3532;ELANE|0.4246;MMP7|0.0619	11	503	159	38520	http://www.ebi.ac.uk/QuickGO/GTerm?id=GO:0009617	[]
5	5	response to organic cyclic compound	GO:0014070	8.7e-06	9.67e-05	11.33	0.83	12.23	-2.88385	C3|1.4997;APOA4|15.2757;SPP1|0.1406;CDH1|0.7311;ANXA1|0.2089;APOA1|18.8799;IGFBP2|0.2754;CAT|15.417;SOD1|16.1436;ASS1|2.4889;IDH1|2.3335;SERPINF1|3.2509;SCGB1A1|0.3532;ARHGDIA|31.3329;FGFR4|6.9823	15	937	159	38520	http://www.ebi.ac.uk/QuickGO/GTerm?id=GO:0014070	[]
4	4	cellular component disassembly	GO:0022411	8.81e-06	9.76e-05	-5.49	-0.89	12.23	-2.88385	FBN1|0.207;DPP4|4.7424;A2M|7.5858;SPP1|0.1406;CDH1|0.7311;HSPA8|4.3251;NID1|0.4093;SH3BGRL3|0.0461;ANXA5|3.6308;PARK7|5.445;FABP1|14.3219;ELANE|0.4246;MYLK|0.6427;MMP7|0.0619;FGFR4|6.9823	15	938	159	38520	http://www.ebi.ac.uk/QuickGO/GTerm?id=GO:0022411	[]
4	4	negative regulation of response to oxidative stress	GO:1902883	9.18e-06	0.000101	3.66	0.05	12.23	-2.88385	PSAP|7.656;HP|6.6069;PARK7|5.445;TXN|16.4437	4	32	159	38520	http://www.ebi.ac.uk/QuickGO/GTerm?id=GO:1902883	[]
6	5,6	positive regulation of fatty acid metabolic process	GO:0045923	9.18e-06	0.000101	4.3	0.11	12.23	-2.88385	APOA4|15.2757;ANXA1|0.2089;APOA1|18.8799;FABP1|14.3219	4	32	159	38520	http://www.ebi.ac.uk/QuickGO/GTerm?id=GO:0045923	[]
6	4,5,6	negative regulation of cellular response to oxidative stress	GO:1900408	9.18e-06	0.000101	3.66	0.05	12.23	-2.88385	PSAP|7.656;HP|6.6069;PARK7|5.445;TXN|16.4437	4	32	159	38520	http://www.ebi.ac.uk/QuickGO/GTerm?id=GO:1900408	[]
6	5,6	negative regulation of programmed cell death	GO:0043069	9.38e-06	0.000103	12.96	1	12.23	-2.88385	ALB|1.2246;ANXA1|0.2089;ANXA4|3.342;PRDX2|35.6451;CAT|15.417;SOD1|16.1436;APOH|11.9124;HSPA1B|4.3652;ANXA5|3.6308;PARK7|5.445;GSTP1|11.8032;FABP1|14.3219;GLO1|3.1333;FGG|3.0479;ARHGDIA|31.3329	15	943	159	38520	http://www.ebi.ac.uk/QuickGO/GTerm?id=GO:0043069	[]
4	4	response to transition metal nanoparticle	GO:1990267	9.64e-06	0.000105	3.51	0.03	12.23	-2.88385	SOD1|16.1436;ASS1|2.4889;S100A8|0.2965;S100A9|0.3945;PARK7|5.445;SORD|1.7219	6	117	159	38520	http://www.ebi.ac.uk/QuickGO/GTerm?id=GO:1990267	[]
2	2	metabolic process	GO:0008152	9.94e-06	0.000108	104.28	10.34	12.23	-2.88385	ALB|1.2246;LRP2|0.4365;TF|1.2823;CUBN|0.3597;C3|1.4997;FBN1|0.207;ANPEP|12.0226;C4A|0.673;ENPEP|21.0863;SERPINA1|29.3765;MGAM|7.379;SERPINA3|19.2309;DPP4|4.7424;PSAP|7.656;A2M|7.5858;HP|6.6069;IGHG2|17.378;GAA|14.4544;EFEMP1|0.0904;APOA4|15.2757;F2|0.1009;GGT1|5.2;SERPINA5|0.2109;CDH1|0.7311;ANXA1|0.2089;SERPINC1|3.4674;APOA1|18.8799;MME|5.2481;ACY1|17.378;NAGLU|8.3946;PGK1|6.0256;ENO1|7.8705;GLB…	134	26672	159	38520	http://www.ebi.ac.uk/QuickGO/GTerm?id=GO:0008152	[]
8	8	positive regulation of lipoprotein lipase activity	GO:0051006	1.11e-05	0.00012	3.54	0.03	12.23	-2.88385	APOA4|15.2757;APOA1|18.8799;APOH|11.9124	3	11	159	38520	http://www.ebi.ac.uk/QuickGO/GTerm?id=GO:0051006	[]
8	7,8	nicotinamide nucleotide metabolic process	GO:0046496	1.12e-05	0.00012	6.09	0.3	12.23	-2.88385	PGK1|6.0256;ENO1|7.8705;TPI1|15.2757;GAPDH|6.0256;LDHB|8.9536;ALDOA|1.7378;IDH1|2.3335;PNP|7.7983	8	253	159	38520	http://www.ebi.ac.uk/QuickGO/GTerm?id=GO:0046496	[]
7	6,7	pyridine nucleotide metabolic process	GO:0019362	1.12e-05	0.00012	6.09	0.3	12.23	-2.88385	PGK1|6.0256;ENO1|7.8705;TPI1|15.2757;GAPDH|6.0256;LDHB|8.9536;ALDOA|1.7378;IDH1|2.3335;PNP|7.7983	8	253	159	38520	http://www.ebi.ac.uk/QuickGO/GTerm?id=GO:0019362	[]
4	4	response to nutrient	GO:0007584	1.14e-05	0.000122	5.24	0.21	12.23	-2.88385	SPP1|0.1406;SERPINC1|3.4674;APOA1|18.8799;IGFBP2|0.2754;CAT|15.417;ASS1|2.4889;AHCY|2.6546	7	182	159	38520	http://www.ebi.ac.uk/QuickGO/GTerm?id=GO:0007584	[]
5	5	carbohydrate derivative catabolic process	GO:1901136	1.15e-05	0.000123	4.9	0.17	12.23	-2.88385	NAGLU|8.3946;GLB1|2.5119;GNS|3.8019;HEXB|2.729;AHCY|2.6546;PNP|7.7983;FUCA1|12.942;GUSB|0.7311	8	254	159	38520	http://www.ebi.ac.uk/QuickGO/GTerm?id=GO:1901136	[]
7	7	hexose biosynthetic process	GO:0019319	1.23e-05	0.00013	4.12	0.09	12.23	-2.88385	PGK1|6.0256;ENO1|7.8705;TPI1|15.2757;GAPDH|6.0256;ALDOA|1.7378;SORD|1.7219	6	122	159	38520	http://www.ebi.ac.uk/QuickGO/GTerm?id=GO:0019319	[]
6	5,6	cell morphogenesis involved in differentiation	GO:0000904	1.23e-05	0.000131	14.15	1.12	12.23	-2.88385	SPP1|0.1406;VASN|0.1738;APOA1|18.8799;HSPA8|4.3251;OLFM4|0.2512;FBLN1|0.1067;HEG1|0.0839;SOD1|16.1436;ACTN4|10.8643;EPHB4|0.6081;HSP90AA1|11.5878;DAG1|3.02;FGG|3.0479;ARHGDIA|31.3329;CDC42|99.0832	15	965	159	38520	http://www.ebi.ac.uk/QuickGO/GTerm?id=GO:0000904	[]
4	4	blood vessel development	GO:0001568	1.27e-05	0.000134	10.56	0.75	12.23	-2.88385	C3|1.4997;ANPEP|12.0226;ENPEP|21.0863;ROBO4|23.1206;KLK3|4.4875;HEG1|0.0839;APOH|11.9124;SERPINF1|3.2509;EPHB4|0.6081;MYLK|0.6427;CDC42|99.0832;ECM1|7.9433	12	627	159	38520	http://www.ebi.ac.uk/QuickGO/GTerm?id=GO:0001568	[]
3	3	positive regulation of multicellular organismal process	GO:0051240	1.29e-05	0.000136	15.29	1.24	12.23	-2.88385	TF|1.2823;C3|1.4997;SPP1|0.1406;F2|0.1009;HEG1|0.0839;SOD1|16.1436;APOH|11.9124;SERPINF1|3.2509;HSPA1B|4.3652;S100A9|0.3945;PARK7|5.445;DAG1|3.02;FGG|3.0479;PNP|7.7983;ELANE|0.4246;ACVR1B|0.1294;ARHGDIA|31.3329;CDC42|99.0832;ECM1|7.9433	19	1484	159	38520	http://www.ebi.ac.uk/QuickGO/GTerm?id=GO:0051240	[]
7	4,6,7	secretion by cell	GO:0032940	1.31e-05	0.000138	12.88	0.99	12.23	-2.88385	ALB|1.2246;TF|1.2823;SERPINA1|29.3765;PSAP|7.656;A2M|7.5858;ANXA1|0.2089;APOA1|18.8799;HSPA8|4.3251;ANXA4|3.342;FBLN1|0.1067;SOD1|16.1436;ALDOA|1.7378;PPIA|7.5858;ACTN4|10.8643;FGG|3.0479;PNP|7.7983;SPINK1|0.5012;CD63|2.0893	18	1351	159	38520	http://www.ebi.ac.uk/QuickGO/GTerm?id=GO:0032940	[]
3	3	activation of immune response	GO:0002253	1.35e-05	0.000141	11.51	0.85	12.23	-2.88385	C3|1.4997;C4A|0.673;A2M|7.5858;IGHG2|17.378;CD55|0.2535;IGHG1|1.3062;HSPA1B|4.3652;P06314|0.1076;HSP90AA1|11.5878;IGHG3|3.281;P01594|0.0614;PLEKHA1|85.5067;CDC42|99.0832	13	740	159	38520	http://www.ebi.ac.uk/QuickGO/GTerm?id=GO:0002253	[]
3	3	macromolecule localization	GO:0033036	1.35e-05	0.000141	26.6	2.39	12.23	-2.88385	ALB|1.2246;TF|1.2823;CUBN|0.3597;C3|1.4997;PIGR|0.7586;FBN1|0.207;PSAP|7.656;APOA4|15.2757;SERPINA5|0.2109;CDH1|0.7311;ANXA1|0.2089;APOA1|18.8799;FBLN5|0.2249;HEXB|2.729;ANXA4|3.342;FBLN1|0.1067;APOH|11.9124;CPE|4.4055;PPIA|7.5858;PRDX1|3.1623;ACTN4|10.8643;MADCAM1|0.7178;PARK7|5.445;FABP1|14.3219;HSP90AA1|11.5878;DAG1|3.02;FGG|3.0479;PNP|7.7983;TXN|16.4437;CD63|2.0893;ACE|2.2909;ARHGDIA|31.3329;…	35	3996	159	38520	http://www.ebi.ac.uk/QuickGO/GTerm?id=GO:0033036	[]
5	5	purine-containing compound metabolic process	GO:0072521	1.37e-05	0.000143	11.36	0.83	12.23	-2.88385	PGK1|6.0256;ENO1|7.8705;HSPA8|4.3251;TPI1|15.2757;GAPDH|6.0256;ACPP|5.4954;CAT|15.417;BHMT|13.5519;ALDOA|1.7378;HSPA1B|4.3652;PARK7|5.445;AHCY|2.6546;PNP|7.7983;BPNT1|12.2462	14	855	159	38520	http://www.ebi.ac.uk/QuickGO/GTerm?id=GO:0072521	[]
6	4,5,6	positive regulation of cellular metabolic process	GO:0031325	1.4e-05	0.000145	23.34	2.06	12.23	-2.88385	TF|1.2823;C3|1.4997;PSAP|7.656;APOA4|15.2757;F2|0.1009;CDH1|0.7311;ANXA1|0.2089;APOA1|18.8799;HSPA8|4.3251;HBB|1.6904;HEXB|2.729;FBLN1|0.1067;CAT|15.417;SOD1|16.1436;ASS1|2.4889;HSPA1B|4.3652;S100A8|0.2965;S100A9|0.3945;ANXA5|3.6308;PARK7|5.445;GSTP1|11.8032;FABP1|14.3219;HSP90AA1|11.5878;FGG|3.0479;TXN|16.4437;CD63|2.0893;ELANE|0.4246;ACE|2.2909;ACVR1B|0.1294;MYLK|0.6427;FGFR4|6.9823;CDC42|99.08…	32	3491	159	38520	http://www.ebi.ac.uk/QuickGO/GTerm?id=GO:0031325	[]
4	4	female pregnancy	GO:0007565	1.41e-05	0.000146	-6.14	-0.96	12.23	-2.88385	SPP1|0.1406;IGFBP2|0.2754;FBLN1|0.1067;SOD1|16.1436;SCGB1A1|0.3532;ACVR1B|0.1294;MMP7|0.0619	7	188	159	38520	http://www.ebi.ac.uk/QuickGO/GTerm?id=GO:0007565	[]
5	5	multicellular organismal macromolecule metabolic process	GO:0044259	1.47e-05	0.000151	-6.21	-0.96	12.23	-2.88385	ENPEP|21.0863;F2|0.1009;ELANE|0.4246;ACE|2.2909;MMP7|0.0619;KLK6|0.0113	6	126	159	38520	http://www.ebi.ac.uk/QuickGO/GTerm?id=GO:0044259	[]
5	5	keratan sulfate catabolic process	GO:0042340	1.48e-05	0.000151	1.42	-0.18	12.23	-2.88385	GLB1|2.5119;GNS|3.8019;HEXB|2.729	3	12	159	38520	http://www.ebi.ac.uk/QuickGO/GTerm?id=GO:0042340	[]
8	7,8	positive regulation of triglyceride lipase activity	GO:0061365	1.48e-05	0.000151	3.54	0.03	12.23	-2.88385	APOA4|15.2757;APOA1|18.8799;APOH|11.9124	3	12	159	38520	http://www.ebi.ac.uk/QuickGO/GTerm?id=GO:0061365	[]
6	6	hexose metabolic process	GO:0019318	1.5e-05	0.000153	6.79	0.37	12.23	-2.88385	GAA|14.4544;PGK1|6.0256;ENO1|7.8705;GLB1|2.5119;TPI1|15.2757;GAPDH|6.0256;ALDOA|1.7378;SORD|1.7219;FUCA1|12.942	9	346	159	38520	http://www.ebi.ac.uk/QuickGO/GTerm?id=GO:0019318	[]
3	3	multi-organism reproductive process	GO:0044703	1.53e-05	0.000155	-12.35	-1.59	12.23	-2.88385	SPP1|0.1406;GGT1|5.2;SERPINA5|0.2109;IGFBP2|0.2754;HEXB|2.729;FBLN1|0.1067;SOD1|16.1436;PVRL2|0.0887;PARK7|5.445;SCGB1A1|0.3532;SPINK1|0.5012;ACE|2.2909;ACVR1B|0.1294;MMP7|0.0619;PLEKHA1|85.5067	15	983	159	38520	http://www.ebi.ac.uk/QuickGO/GTerm?id=GO:0044703	[]
7	6,7	glycosphingolipid metabolic process	GO:0006687	1.64e-05	0.000167	3.61	0.04	12.23	-2.88385	PSAP|7.656;GLB1|2.5119;ARSA|15.8489;HEXB|2.729;ASAH1|4.9204	5	76	159	38520	http://www.ebi.ac.uk/QuickGO/GTerm?id=GO:0006687	[]
5	5	pyridine-containing compound metabolic process	GO:0072524	1.65e-05	0.000167	6.09	0.3	12.23	-2.88385	PGK1|6.0256;ENO1|7.8705;TPI1|15.2757;GAPDH|6.0256;LDHB|8.9536;ALDOA|1.7378;IDH1|2.3335;PNP|7.7983	8	267	159	38520	http://www.ebi.ac.uk/QuickGO/GTerm?id=GO:0072524	[]
5	5	cardiovascular system development	GO:0072358	1.68e-05	0.000169	13.05	1.01	12.23	-2.88385	C3|1.4997;FBN1|0.207;ANPEP|12.0226;ENPEP|21.0863;GAA|14.4544;ROBO4|23.1206;KLK3|4.4875;HEG1|0.0839;APOH|11.9124;CPE|4.4055;SERPINF1|3.2509;EPHB4|0.6081;MYLK|0.6427;CDC42|99.0832;ECM1|7.9433	15	991	159	38520	http://www.ebi.ac.uk/QuickGO/GTerm?id=GO:0072358	[]
5	5	circulatory system development	GO:0072359	1.68e-05	0.000169	13.05	1.01	12.23	-2.88385	C3|1.4997;FBN1|0.207;ANPEP|12.0226;ENPEP|21.0863;GAA|14.4544;ROBO4|23.1206;KLK3|4.4875;HEG1|0.0839;APOH|11.9124;CPE|4.4055;SERPINF1|3.2509;EPHB4|0.6081;MYLK|0.6427;CDC42|99.0832;ECM1|7.9433	15	991	159	38520	http://www.ebi.ac.uk/QuickGO/GTerm?id=GO:0072359	[]
6	6	monosaccharide biosynthetic process	GO:0046364	1.68e-05	0.000169	4.12	0.09	12.23	-2.88385	PGK1|6.0256;ENO1|7.8705;TPI1|15.2757;GAPDH|6.0256;ALDOA|1.7378;SORD|1.7219	6	129	159	38520	http://www.ebi.ac.uk/QuickGO/GTerm?id=GO:0046364	[]
8	7,8	neutrophil aggregation	GO:0070488	1.69e-05	0.000169	-0.93	-0.42	12.23	-2.88385	S100A8|0.2965;S100A9|0.3945	2	2	159	38520	http://www.ebi.ac.uk/QuickGO/GTerm?id=GO:0070488	[]
9	9	peptidyl-cysteine S-trans-nitrosylation	GO:0035606	1.69e-05	0.000169	-0.38	-0.37	12.23	-2.88385	GAPDH|6.0256;S100A9|0.3945	2	2	159	38520	http://www.ebi.ac.uk/QuickGO/GTerm?id=GO:0035606	[]
4	4	oxidation-reduction process	GO:0055114	1.71e-05	0.00017	21.04	1.83	12.23	-2.88385	GAA|14.4544;APOA4|15.2757;APOA1|18.8799;PGK1|6.0256;ENO1|7.8705;TPI1|15.2757;GAPDH|6.0256;HBB|1.6904;PRDX2|35.6451;LDHB|8.9536;CAT|15.417;SOD1|16.1436;ALDOA|1.7378;HBA1|1.6144;PRDX1|3.1623;IDH1|2.3335;SH3BGRL3|0.0461;PRDX6|6.9183;GPX3|15.1356;PARK7|5.445;SORD|1.7219;FABP1|14.3219;TXN|16.4437;AKR7A3|4.3251	24	2240	159	38520	http://www.ebi.ac.uk/QuickGO/GTerm?id=GO:0055114	[]
5	5	vasculature development	GO:0001944	1.78e-05	0.000176	10.56	0.75	12.23	-2.88385	C3|1.4997;ANPEP|12.0226;ENPEP|21.0863;ROBO4|23.1206;KLK3|4.4875;HEG1|0.0839;APOH|11.9124;SERPINF1|3.2509;EPHB4|0.6081;MYLK|0.6427;CDC42|99.0832;ECM1|7.9433	12	649	159	38520	http://www.ebi.ac.uk/QuickGO/GTerm?id=GO:0001944	[]
5	4,5	cellular homeostasis	GO:0019725	1.86e-05	0.000184	4.92	0.18	12.23	-2.88385	TF|1.2823;GAA|14.4544;F2|0.1009;CD55|0.2535;HEXB|2.729;SOD1|16.1436;ALDOA|1.7378;LCN2|0.2051;SERPINF1|3.2509;S100A8|0.2965;SH3BGRL3|0.0461;S100A9|0.3945;TXN|16.4437;CKB|3.0761;ELANE|0.4246	15	1000	159	38520	http://www.ebi.ac.uk/QuickGO/GTerm?id=GO:0019725	[]
7	6,7	regulation of acute inflammatory response	GO:0002673	1.86e-05	0.000184	0.77	-0.25	12.23	-2.88385	C3|1.4997;C4A|0.673;A2M|7.5858;CD55|0.2535;GSTP1|11.8032	5	78	159	38520	http://www.ebi.ac.uk/QuickGO/GTerm?id=GO:0002673	[]
7	7	Fc receptor signaling pathway	GO:0038093	1.87e-05	0.000184	8.08	0.5	12.23	-2.88385	PIGR|0.7586;IGHG2|17.378;IGHG1|1.3062;P06314|0.1076;HSP90AA1|11.5878;IGHG3|3.281;P01594|0.0614;FGFR4|6.9823;CDC42|99.0832	9	356	159	38520	http://www.ebi.ac.uk/QuickGO/GTerm?id=GO:0038093	[]
9	6,7,8,9	negative regulation of hydrogen peroxide-induced cell death	GO:1903206	1.91e-05	0.000188	2.84	-0.04	12.23	-2.88385	PSAP|7.656;PARK7|5.445;TXN|16.4437	3	13	159	38520	http://www.ebi.ac.uk/QuickGO/GTerm?id=GO:1903206	[]
5	4,5	nucleobase-containing small molecule metabolic process	GO:0055086	1.97e-05	0.000192	13.89	1.09	12.23	-2.88385	PGK1|6.0256;ENO1|7.8705;HSPA8|4.3251;TPI1|15.2757;GAPDH|6.0256;ACPP|5.4954;LDHB|8.9536;CAT|15.417;BHMT|13.5519;ALDOA|1.7378;IDH1|2.3335;HSPA1B|4.3652;PARK7|5.445;AHCY|2.6546;PNP|7.7983;TXN|16.4437;BPNT1|12.2462	17	1260	159	38520	http://www.ebi.ac.uk/QuickGO/GTerm?id=GO:0055086	[]
4	4	aging	GO:0007568	2.04e-05	0.000199	5.94	0.28	12.23	-2.88385	MME|5.2481;IGFBP2|0.2754;CAT|15.417;SOD1|16.1436;ASS1|2.4889;SERPINF1|3.2509;MADCAM1|0.7178;MMP7|0.0619	8	275	159	38520	http://www.ebi.ac.uk/QuickGO/GTerm?id=GO:0007568	[]
8	5,7,8	regulation of complement activation	GO:0030449	2.05e-05	0.0002	-0.29	-0.36	12.23	-2.88385	C3|1.4997;C4A|0.673;A2M|7.5858;CD55|0.2535	4	39	159	38520	http://www.ebi.ac.uk/QuickGO/GTerm?id=GO:0030449	[]
4	4	kidney development	GO:0001822	2.15e-05	0.000207	5.57	0.24	12.23	-2.88385	FBN1|0.207;ENPEP|21.0863;MME|5.2481;NID1|0.4093;CAT|15.417;ASS1|2.4889;SERPINF1|3.2509;ACE|2.2909	8	277	159	38520	http://www.ebi.ac.uk/QuickGO/GTerm?id=GO:0001822	[]
7	6,7	regulation of apoptotic process	GO:0042981	2.15e-05	0.000207	17.8	1.49	12.23	-2.88385	ALB|1.2246;ANXA1|0.2089;OLFM4|0.2512;CD248|0.5297;ANXA4|3.342;PRDX2|35.6451;CAT|15.417;SOD1|16.1436;APOH|11.9124;HSPA1B|4.3652;S100A8|0.2965;ACTN4|10.8643;S100A9|0.3945;ANXA5|3.6308;PARK7|5.445;GSTP1|11.8032;FABP1|14.3219;GLO1|3.1333;FGG|3.0479;ARHGDIA|31.3329;CDC42|99.0832	21	1824	159	38520	http://www.ebi.ac.uk/QuickGO/GTerm?id=GO:0042981	[]
3	3	positive regulation of transport	GO:0051050	2.18e-05	0.00021	-2.52	-0.59	12.23	-2.88385	C3|1.4997;C4A|0.673;F2|0.1009;CDH1|0.7311;ANXA1|0.2089;PPIA|7.5858;S100A8|0.2965;ACTN4|10.8643;S100A9|0.3945;PARK7|5.445;FGG|3.0479;CD63|2.0893;MYLK|0.6427;CDC42|99.0832	14	892	159	38520	http://www.ebi.ac.uk/QuickGO/GTerm?id=GO:0051050	[]
7	4,6,7	immune response-regulating cell surface receptor signaling pathway involved in phagocytosis	GO:0002433	2.31e-05	0.000221	7.11	0.4	12.23	-2.88385	IGHG2|17.378;IGHG1|1.3062;P06314|0.1076;HSP90AA1|11.5878;IGHG3|3.281;P01594|0.0614;CDC42|99.0832	7	203	159	38520	http://www.ebi.ac.uk/QuickGO/GTerm?id=GO:0002433	[]
9	5,7,9	Fc-gamma receptor signaling pathway involved in phagocytosis	GO:0038096	2.31e-05	0.000221	7.11	0.4	12.23	-2.88385	IGHG2|17.378;IGHG1|1.3062;P06314|0.1076;HSP90AA1|11.5878;IGHG3|3.281;P01594|0.0614;CDC42|99.0832	7	203	159	38520	http://www.ebi.ac.uk/QuickGO/GTerm?id=GO:0038096	[]
6	5,6	regulation of programmed cell death	GO:0043067	2.37e-05	0.000226	17.8	1.49	12.23	-2.88385	ALB|1.2246;ANXA1|0.2089;OLFM4|0.2512;CD248|0.5297;ANXA4|3.342;PRDX2|35.6451;CAT|15.417;SOD1|16.1436;APOH|11.9124;HSPA1B|4.3652;S100A8|0.2965;ACTN4|10.8643;S100A9|0.3945;ANXA5|3.6308;PARK7|5.445;GSTP1|11.8032;FABP1|14.3219;GLO1|3.1333;FGG|3.0479;ARHGDIA|31.3329;CDC42|99.0832	21	1836	159	38520	http://www.ebi.ac.uk/QuickGO/GTerm?id=GO:0043067	[]
5	5	adaptive immune response based on somatic recombination of immune receptors built from immunoglobulin superfamily domains	GO:0002460	2.38e-05	0.000226	-2.05	-0.54	12.23	-2.88385	C3|1.4997;C4A|0.673;IGHG2|17.378;CD55|0.2535;IGHG1|1.3062;PVRL2|0.0887;P06314|0.1076;IGHG3|3.281;P01594|0.0614	9	367	159	38520	http://www.ebi.ac.uk/QuickGO/GTerm?id=GO:0002460	[]
8	8	Fc-gamma receptor signaling pathway	GO:0038094	2.38e-05	0.000226	7.11	0.4	12.23	-2.88385	IGHG2|17.378;IGHG1|1.3062;P06314|0.1076;HSP90AA1|11.5878;IGHG3|3.281;P01594|0.0614;CDC42|99.0832	7	204	159	38520	http://www.ebi.ac.uk/QuickGO/GTerm?id=GO:0038094	[]
6	6	glycosaminoglycan metabolic process	GO:0030203	2.54e-05	0.000239	4.43	0.13	12.23	-2.88385	NAGLU|8.3946;GLB1|2.5119;GNS|3.8019;HEXB|2.729;ITIH1|6.9183;FUCA1|12.942;GUSB|0.7311	7	206	159	38520	http://www.ebi.ac.uk/QuickGO/GTerm?id=GO:0030203	[]
6	5,6	regulation of cellular ketone metabolic process	GO:0010565	2.54e-05	0.000239	7.01	0.39	12.23	-2.88385	APOA4|15.2757;ANXA1|0.2089;APOA1|18.8799;BHMT|13.5519;PARK7|5.445;FABP1|14.3219;FGFR4|6.9823	7	206	159	38520	http://www.ebi.ac.uk/QuickGO/GTerm?id=GO:0010565	[]
5	5	circulatory system process	GO:0003013	2.62e-05	0.000246	9.64	0.66	12.23	-2.88385	ANPEP|12.0226;ENPEP|21.0863;GAA|14.4544;MME|5.2481;HBB|1.6904;HEG1|0.0839;SOD1|16.1436;FGG|3.0479;ACE|2.2909;CDC42|99.0832	10	466	159	38520	http://www.ebi.ac.uk/QuickGO/GTerm?id=GO:0003013	[]
7	7	cholesterol metabolic process	GO:0008203	2.68e-05	0.000251	6.45	0.33	12.23	-2.88385	CUBN|0.3597;APOA4|15.2757;APOA1|18.8799;CAT|15.417;SOD1|16.1436;APOF|14.1906	6	140	159	38520	http://www.ebi.ac.uk/QuickGO/GTerm?id=GO:0008203	[]
4	4	negative regulation of cellular component organization	GO:0051129	2.76e-05	0.000259	11.44	0.84	12.23	-2.88385	DPP4|4.7424;SPP1|0.1406;VASN|0.1738;APOA1|18.8799;HSPA8|4.3251;FBLN1|0.1067;HSPA1B|4.3652;ACTN4|10.8643;PARK7|5.445;ACE|2.2909;ARHGDIA|31.3329;CDC42|99.0832	12	679	159	38520	http://www.ebi.ac.uk/QuickGO/GTerm?id=GO:0051129	[]
5	4,5	negative regulation of defense response	GO:0031348	2.79e-05	0.00026	4.65	0.15	12.23	-2.88385	A2M|7.5858;SERPINC1|3.4674;APOA1|18.8799;SERPINF1|3.2509;GSTP1|11.8032;ELANE|0.4246	6	141	159	38520	http://www.ebi.ac.uk/QuickGO/GTerm?id=GO:0031348	[]
4	3,4	regulation of multi-organism process	GO:0043900	2.86e-05	0.000266	-6.97	-1.04	12.23	-2.88385	CD55|0.2535;FBLN1|0.1067;PPIA|7.5858;PVRL2|0.0887;ANXA5|3.6308;FABP1|14.3219;SPINK1|0.5012;ELANE|0.4246;ACVR1B|0.1294;MYLK|0.6427	10	471	159	38520	http://www.ebi.ac.uk/QuickGO/GTerm?id=GO:0043900	[]
5	5	alcohol metabolic process	GO:0006066	3.02e-05	0.00028	8.06	0.5	12.23	-2.88385	LRP2|0.4365;CUBN|0.3597;APOA4|15.2757;APOA1|18.8799;CAT|15.417;SOD1|16.1436;PARK7|5.445;SORD|1.7219;TTR|1.9055;APOF|14.1906	10	474	159	38520	http://www.ebi.ac.uk/QuickGO/GTerm?id=GO:0006066	[]
6	5,6	negative regulation of interleukin-8 production	GO:0032717	3.03e-05	0.00028	-0.52	-0.38	12.23	-2.88385	ANXA1|0.2089;ANXA4|3.342;ELANE|0.4246	3	15	159	38520	http://www.ebi.ac.uk/QuickGO/GTerm?id=GO:0032717	[]
5	5	positive regulation of reactive oxygen species biosynthetic process	GO:1903428	3.04e-05	0.00028	2.42	-0.08	12.23	-2.88385	HBB|1.6904;ASS1|2.4889;PARK7|5.445;HSP90AA1|11.5878	4	43	159	38520	http://www.ebi.ac.uk/QuickGO/GTerm?id=GO:1903428	[]
8	6,8	Fc receptor mediated stimulatory signaling pathway	GO:0002431	3.05e-05	0.00028	7.11	0.4	12.23	-2.88385	IGHG2|17.378;IGHG1|1.3062;P06314|0.1076;HSP90AA1|11.5878;IGHG3|3.281;P01594|0.0614;CDC42|99.0832	7	212	159	38520	http://www.ebi.ac.uk/QuickGO/GTerm?id=GO:0002431	[]
4	4	angiogenesis	GO:0001525	3.07e-05	0.000282	9.3	0.62	12.23	-2.88385	C3|1.4997;ANPEP|12.0226;ENPEP|21.0863;ROBO4|23.1206;KLK3|4.4875;APOH|11.9124;SERPINF1|3.2509;EPHB4|0.6081;CDC42|99.0832;ECM1|7.9433	10	475	159	38520	http://www.ebi.ac.uk/QuickGO/GTerm?id=GO:0001525	[]
4	4	cellular aldehyde metabolic process	GO:0006081	3.16e-05	0.000289	3.42	0.02	12.23	-2.88385	TPI1|15.2757;IDH1|2.3335;PARK7|5.445;GLO1|3.1333;AKR7A3|4.3251	5	87	159	38520	http://www.ebi.ac.uk/QuickGO/GTerm?id=GO:0006081	[]
4	4	reactive oxygen species biosynthetic process	GO:1903409	3.16e-05	0.000289	3.63	0.04	12.23	-2.88385	HBB|1.6904;SOD1|16.1436;ASS1|2.4889;PARK7|5.445;HSP90AA1|11.5878	5	87	159	38520	http://www.ebi.ac.uk/QuickGO/GTerm?id=GO:1903409	[]
5	4,5	signal transduction	GO:0007165	3.18e-05	0.000289	45.17	4.3	12.23	-2.88385	LRP2|0.4365;TF|1.2823;C3|1.4997;PIGR|0.7586;FBN1|0.207;PSAP|7.656;A2M|7.5858;IGHG2|17.378;EFEMP1|0.0904;APOA4|15.2757;VASN|0.1738;F2|0.1009;CDH1|0.7311;ANXA1|0.2089;APOA1|18.8799;OLFM4|0.2512;CD55|0.2535;IGFBP2|0.2754;KLK3|4.4875;ACPP|5.4954;ANXA4|3.342;FBLN1|0.1067;IGHG1|1.3062;CAT|15.417;SOD1|16.1436;CPE|4.4055;PVRL2|0.0887;PRDX1|3.1623;HSPA1B|4.3652;S100A8|0.2965;NOV|2.8054;ACTN4|10.8643;SPARC…	61	9195	159	38520	http://www.ebi.ac.uk/QuickGO/GTerm?id=GO:0007165	[]
5	5	renal system development	GO:0072001	3.2e-05	0.00029	5.57	0.24	12.23	-2.88385	FBN1|0.207;ENPEP|21.0863;MME|5.2481;NID1|0.4093;CAT|15.417;ASS1|2.4889;SERPINF1|3.2509;ACE|2.2909	8	293	159	38520	http://www.ebi.ac.uk/QuickGO/GTerm?id=GO:0072001	[]
7	7	triglyceride metabolic process	GO:0006641	3.26e-05	0.000295	6.06	0.29	12.23	-2.88385	C3|1.4997;APOA4|15.2757;APOA1|18.8799;CAT|15.417;APOH|11.9124;FABP1|14.3219	6	145	159	38520	http://www.ebi.ac.uk/QuickGO/GTerm?id=GO:0006641	[]
5	5	cellular protein metabolic process	GO:0044267	3.3e-05	0.000298	46.52	4.43	12.23	-2.88385	LRP2|0.4365;TF|1.2823;C3|1.4997;ANPEP|12.0226;C4A|0.673;ENPEP|21.0863;SERPINA1|29.3765;SERPINA3|19.2309;PSAP|7.656;A2M|7.5858;EFEMP1|0.0904;F2|0.1009;SERPINA5|0.2109;ANXA1|0.2089;SERPINC1|3.4674;APOA1|18.8799;MME|5.2481;GLB1|2.5119;HSPA8|4.3251;GAPDH|6.0256;CD55|0.2535;IGFBP2|0.2754;KLK3|4.4875;ARSA|15.8489;HEXB|2.729;FBLN1|0.1067;SOD1|16.1436;CPE|4.4055;PEBP1|6.7298;BHMT|13.5519;PROZ|13.0617;PPI…	60	8998	159	38520	http://www.ebi.ac.uk/QuickGO/GTerm?id=GO:0044267	[]
7	5,7	positive regulation of wound healing	GO:0090303	3.34e-05	0.0003	-2.67	-0.6	12.23	-2.88385	F2|0.1009;APOH|11.9124;S100A9|0.3945;MYLK|0.6427	4	44	159	38520	http://www.ebi.ac.uk/QuickGO/GTerm?id=GO:0090303	[]
4	4	positive regulation of response to wounding	GO:1903036	3.39e-05	0.000304	-3.37	-0.67	12.23	-2.88385	C3|1.4997;F2|0.1009;APOH|11.9124;S100A8|0.2965;S100A9|0.3945;MYLK|0.6427	6	146	159	38520	http://www.ebi.ac.uk/QuickGO/GTerm?id=GO:1903036	[]
6	5,6	cell surface receptor signaling pathway	GO:0007166	3.43e-05	0.000307	26.32	2.37	12.23	-2.88385	LRP2|0.4365;TF|1.2823;PIGR|0.7586;FBN1|0.207;IGHG2|17.378;EFEMP1|0.0904;VASN|0.1738;F2|0.1009;ANXA1|0.2089;APOA1|18.8799;CD55|0.2535;IGFBP2|0.2754;ACPP|5.4954;FBLN1|0.1067;IGHG1|1.3062;CPE|4.4055;HSPA1B|4.3652;MADCAM1|0.7178;P06314|0.1076;PARK7|5.445;GSTP1|11.8032;EPHB4|0.6081;HSP90AA1|11.5878;FGG|3.0479;CD63|2.0893;IGHG3|3.281;ACVR1B|0.1294;ARHGDIA|31.3329;P01594|0.0614;FGFR4|6.9823;PLEKHA1|85.5…	33	3825	159	38520	http://www.ebi.ac.uk/QuickGO/GTerm?id=GO:0007166	[]
4	4	negative regulation of cell adhesion	GO:0007162	3.64e-05	0.000325	1.56	-0.17	12.23	-2.88385	CDH1|0.7311;APOA1|18.8799;FBLN1|0.1067;ASS1|2.4889;ACTN4|10.8643;SCGB1A1|0.3532;ARHGDIA|31.3329	7	218	159	38520	http://www.ebi.ac.uk/QuickGO/GTerm?id=GO:0007162	[]
6	5,6	negative regulation of cytokine secretion	GO:0050710	3.65e-05	0.000325	-0.15	-0.34	12.23	-2.88385	ANXA1|0.2089;APOA1|18.8799;ANXA4|3.342;FBLN1|0.1067	4	45	159	38520	http://www.ebi.ac.uk/QuickGO/GTerm?id=GO:0050710	[]
5	5	response to steroid hormone	GO:0048545	3.66e-05	0.000325	6.46	0.33	12.23	-2.88385	C3|1.4997;SPP1|0.1406;ANXA1|0.2089;APOA1|18.8799;IGFBP2|0.2754;CAT|15.417;ASS1|2.4889;IDH1|2.3335;SERPINF1|3.2509;SCGB1A1|0.3532	10	485	159	38520	http://www.ebi.ac.uk/QuickGO/GTerm?id=GO:0048545	[]
8	6,7,8	regulation of hydrogen peroxide-induced cell death	GO:1903205	3.72e-05	0.000327	2.84	-0.04	12.23	-2.88385	PSAP|7.656;PARK7|5.445;TXN|16.4437	3	16	159	38520	http://www.ebi.ac.uk/QuickGO/GTerm?id=GO:1903205	[]
7	6,7	positive regulation of fatty acid biosynthetic process	GO:0045723	3.72e-05	0.000327	0.68	-0.26	12.23	-2.88385	APOA4|15.2757;ANXA1|0.2089;APOA1|18.8799	3	16	159	38520	http://www.ebi.ac.uk/QuickGO/GTerm?id=GO:0045723	[]
7	7	regulation of lipoprotein lipase activity	GO:0051004	3.72e-05	0.000327	3.54	0.03	12.23	-2.88385	APOA4|15.2757;APOA1|18.8799;APOH|11.9124	3	16	159	38520	http://www.ebi.ac.uk/QuickGO/GTerm?id=GO:0051004	[]
6	6	oxidoreduction coenzyme metabolic process	GO:0006733	3.78e-05	0.000332	6.09	0.3	12.23	-2.88385	PGK1|6.0256;ENO1|7.8705;TPI1|15.2757;GAPDH|6.0256;LDHB|8.9536;ALDOA|1.7378;IDH1|2.3335;PNP|7.7983	8	300	159	38520	http://www.ebi.ac.uk/QuickGO/GTerm?id=GO:0006733	[]
8	7,8	regulation of protein phosphorylation	GO:0001932	3.83e-05	0.000336	14.87	1.19	12.23	-2.88385	TF|1.2823;C3|1.4997;PSAP|7.656;F2|0.1009;APOA1|18.8799;FBLN1|0.1067;SOD1|16.1436;PRDX1|3.1623;PARK7|5.445;GSTP1|11.8032;DAG1|3.02;FGG|3.0479;TXN|16.4437;SPINK1|0.5012;ELANE|0.4246;ACE|2.2909;ACVR1B|0.1294;FGFR4|6.9823;CDC42|99.0832	19	1607	159	38520	http://www.ebi.ac.uk/QuickGO/GTerm?id=GO:0001932	[]
7	7	response to glucocorticoid	GO:0051384	3.94e-05	0.000345	0.61	-0.27	12.23	-2.88385	C3|1.4997;ANXA1|0.2089;IGFBP2|0.2754;ASS1|2.4889;SERPINF1|3.2509;SCGB1A1|0.3532	6	150	159	38520	http://www.ebi.ac.uk/QuickGO/GTerm?id=GO:0051384	[]
7	5,6,7	regulation of oxidative stress-induced cell death	GO:1903201	3.98e-05	0.000346	4.04	0.09	12.23	-2.88385	PSAP|7.656;SOD1|16.1436;PARK7|5.445;TXN|16.4437	4	46	159	38520	http://www.ebi.ac.uk/QuickGO/GTerm?id=GO:1903201	[]
6	6	regulation of systemic arterial blood pressure by hormone	GO:0001990	3.98e-05	0.000346	3.48	0.03	12.23	-2.88385	ANPEP|12.0226;ENPEP|21.0863;MME|5.2481;ACE|2.2909	4	46	159	38520	http://www.ebi.ac.uk/QuickGO/GTerm?id=GO:0001990	[]
6	5,6	lipid transport	GO:0006869	3.99e-05	0.000346	8.53	0.55	12.23	-2.88385	ALB|1.2246;PSAP|7.656;APOA4|15.2757;SERPINA5|0.2109;ANXA1|0.2089;APOA1|18.8799;APOH|11.9124;FABP1|14.3219;ACE|2.2909;APOF|14.1906	10	490	159	38520	http://www.ebi.ac.uk/QuickGO/GTerm?id=GO:0006869	[]
7	7	endothelial cell migration	GO:0043542	4.24e-05	0.000367	5.09	0.19	12.23	-2.88385	DPP4|4.7424;APOA1|18.8799;APOH|11.9124;SERPINF1|3.2509;SH3BGRL3|0.0461;EPHB4|0.6081	6	152	159	38520	http://www.ebi.ac.uk/QuickGO/GTerm?id=GO:0043542	[]
4	3,4	cell growth	GO:0016049	4.27e-05	0.000369	-7.4	-1.09	12.23	-2.88385	SPP1|0.1406;F2|0.1009;IGFBP7|0.0655;ENO1|7.8705;FBLN5|0.2249;IGFBP2|0.2754;S100A8|0.2965;NOV|2.8054;S100A9|0.3945;ACVR1B|0.1294	10	494	159	38520	http://www.ebi.ac.uk/QuickGO/GTerm?id=GO:0016049	[]
4	4	cellular ketone metabolic process	GO:0042180	4.35e-05	0.000374	7.5	0.44	12.23	-2.88385	APOA4|15.2757;ANXA1|0.2089;APOA1|18.8799;BHMT|13.5519;PARK7|5.445;FABP1|14.3219;GLO1|3.1333;FGFR4|6.9823	8	306	159	38520	http://www.ebi.ac.uk/QuickGO/GTerm?id=GO:0042180	[]
4	4	tissue development	GO:0009888	4.39e-05	0.000377	8.74	0.57	12.23	-2.88385	PSAP|7.656;GAA|14.4544;EFEMP1|0.0904;SPP1|0.1406;VASN|0.1738;ANXA1|0.2089;PGK1|6.0256;ANXA4|3.342;HEG1|0.0839;CAT|15.417;SOD1|16.1436;SERPINF1|3.2509;GSTA2|18.5353;MADCAM1|0.7178;CST6|0.0692;DAG1|3.02;ACVR1B|0.1294;MYLK|0.6427;CDC42|99.0832;KLK6|0.0113;ECM1|7.9433	21	1916	159	38520	http://www.ebi.ac.uk/QuickGO/GTerm?id=GO:0009888	[]
6	6	acylglycerol metabolic process	GO:0006639	4.4e-05	0.000377	6.06	0.29	12.23	-2.88385	C3|1.4997;APOA4|15.2757;APOA1|18.8799;CAT|15.417;APOH|11.9124;FABP1|14.3219	6	153	159	38520	http://www.ebi.ac.uk/QuickGO/GTerm?id=GO:0006639	[]
5	5	organic substance transport	GO:0071702	4.55e-05	0.000387	24.77	2.21	12.23	-2.88385	ALB|1.2246;TF|1.2823;CUBN|0.3597;C3|1.4997;PSAP|7.656;APOA4|15.2757;SERPINA5|0.2109;CDH1|0.7311;ANXA1|0.2089;APOA1|18.8799;HBB|1.6904;CA1|26.3027;ANXA4|3.342;FBLN1|0.1067;APOH|11.9124;PPIA|7.5858;HBA1|1.6144;PRDX1|3.1623;S100A8|0.2965;ACTN4|10.8643;S100A9|0.3945;PARK7|5.445;FABP1|14.3219;HSP90AA1|11.5878;TTR|1.9055;DAG1|3.02;FGG|3.0479;PNP|7.7983;TXN|16.4437;CD63|2.0893;ACE|2.2909;MMP7|0.0619;APO…	34	4056	159	38520	http://www.ebi.ac.uk/QuickGO/GTerm?id=GO:0071702	[]
5	5	neutral lipid metabolic process	GO:0006638	4.57e-05	0.000387	6.06	0.29	12.23	-2.88385	C3|1.4997;APOA4|15.2757;APOA1|18.8799;CAT|15.417;APOH|11.9124;FABP1|14.3219	6	154	159	38520	http://www.ebi.ac.uk/QuickGO/GTerm?id=GO:0006638	[]
7	5,7	defense response to bacterium	GO:0042742	4.57e-05	0.000387	-4.25	-0.76	12.23	-2.88385	HP|6.6069;KLK3|4.4875;S100A8|0.2965;LYZ|0.5445;S100A9|0.3945;ELANE|0.4246;MMP7|0.0619	7	226	159	38520	http://www.ebi.ac.uk/QuickGO/GTerm?id=GO:0042742	[]
7	6,7	leukocyte aggregation	GO:0070486	4.57e-05	0.000387	-7.99	-1.15	12.23	-2.88385	DPP4|4.7424;ANXA1|0.2089;CD55|0.2535;IGFBP2|0.2754;SOD1|16.1436;S100A8|0.2965;S100A9|0.3945;PNP|7.7983;SCGB1A1|0.3532;CDC42|99.0832	10	498	159	38520	http://www.ebi.ac.uk/QuickGO/GTerm?id=GO:0070486	[]
7	5,6,7	negative regulation of cell morphogenesis involved in differentiation	GO:0010771	4.83e-05	0.000408	-2.53	-0.59	12.23	-2.88385	SPP1|0.1406;VASN|0.1738;FBLN1|0.1067;ACTN4|10.8643;ARHGDIA|31.3329	5	95	159	38520	http://www.ebi.ac.uk/QuickGO/GTerm?id=GO:0010771	[]
6	6	regulation of leukocyte cell-cell adhesion	GO:1903037	4.87e-05	0.000411	6.78	0.37	12.23	-2.88385	DPP4|4.7424;CD55|0.2535;IGFBP2|0.2754;SOD1|16.1436;ASS1|2.4889;PNP|7.7983;SCGB1A1|0.3532;CDC42|99.0832	8	311	159	38520	http://www.ebi.ac.uk/QuickGO/GTerm?id=GO:1903037	[]
5	5	methylglyoxal metabolic process	GO:0009438	5.07e-05	0.000422	1.23	-0.2	12.23	-2.88385	PARK7|5.445;GLO1|3.1333	2	3	159	38520	http://www.ebi.ac.uk/QuickGO/GTerm?id=GO:0009438	[]
7	5,6,7	maltose metabolic process	GO:0000023	5.07e-05	0.000422	2.03	-0.12	12.23	-2.88385	MGAM|7.379;GAA|14.4544	2	3	159	38520	http://www.ebi.ac.uk/QuickGO/GTerm?id=GO:0000023	[]
10	4,6,8,10	angiotensin catabolic process in blood	GO:0002005	5.07e-05	0.000422	1.68	-0.16	12.23	-2.88385	ENPEP|21.0863;ACE|2.2909	2	3	159	38520	http://www.ebi.ac.uk/QuickGO/GTerm?id=GO:0002005	[]
4	4	cellular response to redox state	GO:0071461	5.07e-05	0.000422	-0.74	-0.4	12.23	-2.88385	VASN|0.1738;ARHGDIA|31.3329	2	3	159	38520	http://www.ebi.ac.uk/QuickGO/GTerm?id=GO:0071461	[]
7	6,7	regulation of fibril organization	GO:1902903	5.07e-05	0.000422	1.37	-0.19	12.23	-2.88385	HSPA8|4.3251;PARK7|5.445	2	3	159	38520	http://www.ebi.ac.uk/QuickGO/GTerm?id=GO:1902903	[]
6	5,6	negative regulation of inflammatory response	GO:0050728	5.08e-05	0.000422	3.77	0.06	12.23	-2.88385	SERPINC1|3.4674;APOA1|18.8799;SERPINF1|3.2509;GSTP1|11.8032;ELANE|0.4246	5	96	159	38520	http://www.ebi.ac.uk/QuickGO/GTerm?id=GO:0050728	[]
5	5	regulation of lipid catabolic process	GO:0050994	5.12e-05	0.000424	3.98	0.08	12.23	-2.88385	APOA4|15.2757;APOA1|18.8799;IDH1|2.3335;FABP1|14.3219	4	49	159	38520	http://www.ebi.ac.uk/QuickGO/GTerm?id=GO:0050994	[]
6	6	response to corticosteroid	GO:0031960	5.27e-05	0.000435	0.61	-0.27	12.23	-2.88385	C3|1.4997;ANXA1|0.2089;IGFBP2|0.2754;ASS1|2.4889;SERPINF1|3.2509;SCGB1A1|0.3532	6	158	159	38520	http://www.ebi.ac.uk/QuickGO/GTerm?id=GO:0031960	[]
7	6,7	cell death in response to hydrogen peroxide	GO:0036474	5.38e-05	0.000444	2.84	-0.04	12.23	-2.88385	PSAP|7.656;PARK7|5.445;TXN|16.4437	3	18	159	38520	http://www.ebi.ac.uk/QuickGO/GTerm?id=GO:0036474	[]
5	4,5	cell development	GO:0048468	5.4e-05	0.000444	21.5	1.87	12.23	-2.88385	APOA4|15.2757;SPP1|0.1406;VASN|0.1738;F2|0.1009;CDH1|0.7311;APOA1|18.8799;NAGLU|8.3946;HSPA8|4.3251;OLFM4|0.2512;HEXB|2.729;FBLN1|0.1067;HEG1|0.0839;SOD1|16.1436;PVRL2|0.0887;SERPINF1|3.2509;ACTN4|10.8643;EPHB4|0.6081;HSP90AA1|11.5878;DAG1|3.02;FGG|3.0479;ARHGDIA|31.3329;FLNC|0.6855;CDC42|99.0832;KLK6|0.0113	24	2407	159	38520	http://www.ebi.ac.uk/QuickGO/GTerm?id=GO:0048468	[]
7	4,5,7	negative regulation of hemostasis	GO:1900047	5.55e-05	0.000454	3.12	-0.01	12.23	-2.88385	F2|0.1009;APOH|11.9124;ANXA5|3.6308;FGG|3.0479	4	50	159	38520	http://www.ebi.ac.uk/QuickGO/GTerm?id=GO:1900047	[]
8	5,6,7,8	negative regulation of blood coagulation	GO:0030195	5.55e-05	0.000454	3.12	-0.01	12.23	-2.88385	F2|0.1009;APOH|11.9124;ANXA5|3.6308;FGG|3.0479	4	50	159	38520	http://www.ebi.ac.uk/QuickGO/GTerm?id=GO:0030195	[]
4	4	organophosphate metabolic process	GO:0019637	5.62e-05	0.000458	17.06	1.42	12.23	-2.88385	APOA4|15.2757;APOA1|18.8799;PGK1|6.0256;ENO1|7.8705;HSPA8|4.3251;TPI1|15.2757;GAPDH|6.0256;ACPP|5.4954;HEXB|2.729;LDHB|8.9536;CAT|15.417;ALDOA|1.7378;IDH1|2.3335;HSPA1B|4.3652;PRDX6|6.9183;PARK7|5.445;PNP|7.7983;CPNE3|1.6293;BPNT1|12.2462;CDC42|99.0832	20	1800	159	38520	http://www.ebi.ac.uk/QuickGO/GTerm?id=GO:0019637	[]
5	4,5	positive regulation of cell proliferation	GO:0008284	5.83e-05	0.000475	-6.46	-0.99	12.23	-2.88385	DPP4|4.7424;F2|0.1009;CD55|0.2535;CD248|0.5297;IGFBP2|0.2754;FBLN1|0.1067;FABP1|14.3219;REG1A|0.0441;PNP|7.7983;ELANE|0.4246;FGFR4|6.9823;CDC42|99.0832;ECM1|7.9433	13	853	159	38520	http://www.ebi.ac.uk/QuickGO/GTerm?id=GO:0008284	[]
6	6	sterol metabolic process	GO:0016125	5.85e-05	0.000475	6.45	0.33	12.23	-2.88385	CUBN|0.3597;APOA4|15.2757;APOA1|18.8799;CAT|15.417;SOD1|16.1436;APOF|14.1906	6	161	159	38520	http://www.ebi.ac.uk/QuickGO/GTerm?id=GO:0016125	[]
8	6,7,8	ERK1 and ERK2 cascade	GO:0070371	6.67e-05	0.00054	4.93	0.18	12.23	-2.88385	TF|1.2823;C3|1.4997;APOA1|18.8799;FBLN1|0.1067;GSTP1|11.8032;FGG|3.0479;FGFR4|6.9823	7	240	159	38520	http://www.ebi.ac.uk/QuickGO/GTerm?id=GO:0070371	[]
4	4	response to toxic substance	GO:0009636	6.7e-05	0.000542	5.56	0.24	12.23	-2.88385	CDH1|0.7311;CAT|15.417;SOD1|16.1436;ASS1|2.4889;PARK7|5.445;BLMH|77.983	6	165	159	38520	http://www.ebi.ac.uk/QuickGO/GTerm?id=GO:0009636	[]
5	5	cellular amide metabolic process	GO:0043603	6.87e-05	0.000552	14.64	1.17	12.23	-2.88385	ANPEP|12.0226;ENPEP|21.0863;GGT1|5.2;MME|5.2481;GAPDH|6.0256;HEXB|2.729;ASAH1|4.9204;SOD1|16.1436;CPE|4.4055;ASS1|2.4889;IDH1|2.3335;GSTA2|18.5353;S100A9|0.3945;CNDP2|17.0608;GSTP1|11.8032;GLO1|3.1333;ACE|2.2909;MMP7|0.0619;APEH|1.7378	19	1679	159	38520	http://www.ebi.ac.uk/QuickGO/GTerm?id=GO:0043603	[]
5	5	monosaccharide metabolic process	GO:0005996	6.87e-05	0.000552	6.79	0.37	12.23	-2.88385	GAA|14.4544;PGK1|6.0256;ENO1|7.8705;GLB1|2.5119;TPI1|15.2757;GAPDH|6.0256;ALDOA|1.7378;SORD|1.7219;FUCA1|12.942	9	421	159	38520	http://www.ebi.ac.uk/QuickGO/GTerm?id=GO:0005996	[]
5	5	aminoglycan metabolic process	GO:0006022	7.03e-05	0.000564	4.43	0.13	12.23	-2.88385	NAGLU|8.3946;GLB1|2.5119;GNS|3.8019;HEXB|2.729;ITIH1|6.9183;FUCA1|12.942;GUSB|0.7311	7	242	159	38520	http://www.ebi.ac.uk/QuickGO/GTerm?id=GO:0006022	[]
2	2	cellular process	GO:0009987	7.27e-05	0.000582	114.03	11.34	12.23	-2.88385	ALB|1.2246;LRP2|0.4365;TF|1.2823;CUBN|0.3597;C3|1.4997;PIGR|0.7586;FBN1|0.207;ANPEP|12.0226;C4A|0.673;ENPEP|21.0863;SERPINA1|29.3765;MGAM|7.379;SERPINA3|19.2309;DPP4|4.7424;PSAP|7.656;A2M|7.5858;HP|6.6069;IGHG2|17.378;GAA|14.4544;KRT13|0.278;EFEMP1|0.0904;APOA4|15.2757;SPP1|0.1406;VASN|0.1738;F2|0.1009;GGT1|5.2;SERPINA5|0.2109;CDH1|0.7311;ANXA1|0.2089;IGFBP7|0.0655;SERPINC1|3.4674;APOA1|18.8799;M…	149	32069	159	38520	http://www.ebi.ac.uk/QuickGO/GTerm?id=GO:0009987	[]
4	4	cellular response to stress	GO:0033554	7.36e-05	0.000588	23.36	2.06	12.23	-2.88385	ALB|1.2246;TF|1.2823;PSAP|7.656;HP|6.6069;APOA4|15.2757;SPP1|0.1406;VASN|0.1738;ANXA1|0.2089;APOA1|18.8799;HSPA8|4.3251;FBLN5|0.2249;PRDX2|35.6451;SOD1|16.1436;ASS1|2.4889;PRDX1|3.1623;HSPA1B|4.3652;ANXA5|3.6308;PARK7|5.445;GSTP1|11.8032;FABP1|14.3219;HSP90AA1|11.5878;TXN|16.4437;SHISA5|0.2965;MYLK|0.6427;UBA1|0.2128;PLEKHA1|85.5067;CDC42|99.0832	27	2945	159	38520	http://www.ebi.ac.uk/QuickGO/GTerm?id=GO:0033554	[]
5	5	small molecule biosynthetic process	GO:0044283	7.69e-05	0.000613	9.49	0.64	12.23	-2.88385	APOA4|15.2757;GGT1|5.2;ANXA1|0.2089;APOA1|18.8799;SOD1|16.1436;BHMT|13.5519;ASS1|2.4889;PARK7|5.445;AHCY|2.6546;PNP|7.7983;FGFR4|6.9823	11	640	159	38520	http://www.ebi.ac.uk/QuickGO/GTerm?id=GO:0044283	[]
4	4	regulation of immune effector process	GO:0002697	7.78e-05	0.000619	2.01	-0.12	12.23	-2.88385	C3|1.4997;C4A|0.673;A2M|7.5858;APOA1|18.8799;CD55|0.2535;PVRL2|0.0887;ANXA5|3.6308;FABP1|14.3219;MYLK|0.6427	9	428	159	38520	http://www.ebi.ac.uk/QuickGO/GTerm?id=GO:0002697	[]
6	6	carboxylic acid biosynthetic process	GO:0046394	8.06e-05	0.000637	7.39	0.43	12.23	-2.88385	APOA4|15.2757;GGT1|5.2;ANXA1|0.2089;APOA1|18.8799;BHMT|13.5519;ASS1|2.4889;PARK7|5.445;AHCY|2.6546;FGFR4|6.9823	9	430	159	38520	http://www.ebi.ac.uk/QuickGO/GTerm?id=GO:0046394	[]
5	5	organic acid biosynthetic process	GO:0016053	8.06e-05	0.000637	7.39	0.43	12.23	-2.88385	APOA4|15.2757;GGT1|5.2;ANXA1|0.2089;APOA1|18.8799;BHMT|13.5519;ASS1|2.4889;PARK7|5.445;AHCY|2.6546;FGFR4|6.9823	9	430	159	38520	http://www.ebi.ac.uk/QuickGO/GTerm?id=GO:0016053	[]
9	6,7,8,9	positive regulation of intrinsic apoptotic signaling pathway	GO:2001244	8.09e-05	0.000637	-1.01	-0.43	12.23	-2.88385	SOD1|16.1436;S100A8|0.2965;S100A9|0.3945;PARK7|5.445	4	55	159	38520	http://www.ebi.ac.uk/QuickGO/GTerm?id=GO:2001244	[]
4	4	negative regulation of coagulation	GO:0050819	8.09e-05	0.000637	3.12	-0.01	12.23	-2.88385	F2|0.1009;APOH|11.9124;ANXA5|3.6308;FGG|3.0479	4	55	159	38520	http://www.ebi.ac.uk/QuickGO/GTerm?id=GO:0050819	[]
5	5	coenzyme metabolic process	GO:0006732	8.15e-05	0.00064	7.65	0.45	12.23	-2.88385	PGK1|6.0256;ENO1|7.8705;TPI1|15.2757;GAPDH|6.0256;LDHB|8.9536;BHMT|13.5519;ALDOA|1.7378;IDH1|2.3335;AHCY|2.6546;PNP|7.7983	10	534	159	38520	http://www.ebi.ac.uk/QuickGO/GTerm?id=GO:0006732	[]
4	4	response to radiation	GO:0009314	8.53e-05	0.000668	7.83	0.47	12.23	-2.88385	LRP2|0.4365;KRT13|0.278;APOA4|15.2757;ANXA1|0.2089;APOA1|18.8799;MME|5.2481;CAT|15.417;TTR|1.9055;TXN|16.4437;ELANE|0.4246	10	537	159	38520	http://www.ebi.ac.uk/QuickGO/GTerm?id=GO:0009314	[]
9	6,9	regulation of systemic arterial blood pressure mediated by a chemical signal	GO:0003044	8.69e-05	0.000678	3.48	0.03	12.23	-2.88385	ANPEP|12.0226;ENPEP|21.0863;MME|5.2481;ACE|2.2909	4	56	159	38520	http://www.ebi.ac.uk/QuickGO/GTerm?id=GO:0003044	[]
6	5,6	muscle cell cellular homeostasis	GO:0046716	8.69e-05	0.000678	2.61	-0.06	12.23	-2.88385	GAA|14.4544;SOD1|16.1436;ALDOA|1.7378	3	21	159	38520	http://www.ebi.ac.uk/QuickGO/GTerm?id=GO:0046716	[]
5	5	regulation of cell development	GO:0060284	8.73e-05	0.000679	6.13	0.3	12.23	-2.88385	SPP1|0.1406;VASN|0.1738;F2|0.1009;APOA1|18.8799;OLFM4|0.2512;FBLN1|0.1067;SERPINF1|3.2509;ACTN4|10.8643;DAG1|3.02;FGG|3.0479;ARHGDIA|31.3329;CDC42|99.0832;KLK6|0.0113	13	888	159	38520	http://www.ebi.ac.uk/QuickGO/GTerm?id=GO:0060284	[]
8	8	gluconeogenesis	GO:0006094	8.9e-05	0.000691	3.88	0.07	12.23	-2.88385	PGK1|6.0256;ENO1|7.8705;TPI1|15.2757;GAPDH|6.0256;ALDOA|1.7378	5	108	159	38520	http://www.ebi.ac.uk/QuickGO/GTerm?id=GO:0006094	[]
4	4	regulation of transport	GO:0051049	9.1e-05	0.000705	15.31	1.24	12.23	-2.88385	C3|1.4997;C4A|0.673;APOA4|15.2757;F2|0.1009;CDH1|0.7311;ANXA1|0.2089;APOA1|18.8799;OLFM4|0.2512;ANXA4|3.342;FBLN1|0.1067;PPIA|7.5858;PRDX1|3.1623;S100A8|0.2965;ACTN4|10.8643;S100A9|0.3945;PARK7|5.445;FGG|3.0479;TXN|16.4437;SPINK1|0.5012;CD63|2.0893;MYLK|0.6427;CDC42|99.0832	22	2172	159	38520	http://www.ebi.ac.uk/QuickGO/GTerm?id=GO:0051049	[]
4	4	cell communication	GO:0007154	9.14e-05	0.000706	48.38	4.62	12.23	-2.88385	ALB|1.2246;LRP2|0.4365;TF|1.2823;C3|1.4997;PIGR|0.7586;FBN1|0.207;ENPEP|21.0863;PSAP|7.656;A2M|7.5858;IGHG2|17.378;EFEMP1|0.0904;APOA4|15.2757;VASN|0.1738;F2|0.1009;CDH1|0.7311;ANXA1|0.2089;APOA1|18.8799;HSPA8|4.3251;OLFM4|0.2512;CD55|0.2535;IGFBP2|0.2754;KLK3|4.4875;ACPP|5.4954;ANXA4|3.342;FBLN1|0.1067;IGHG1|1.3062;CAT|15.417;SOD1|16.1436;CPE|4.4055;PVRL2|0.0887;PRDX1|3.1623;HSPA1B|4.3652;S100A8…	65	10366	159	38520	http://www.ebi.ac.uk/QuickGO/GTerm?id=GO:0007154	[]
4	4	gland development	GO:0048732	9.27e-05	0.000715	7.57	0.45	12.23	-2.88385	PSAP|7.656;CDH1|0.7311;ANXA1|0.2089;APOA1|18.8799;SOD1|16.1436;ASS1|2.4889;SERPINF1|3.2509;DAG1|3.02;CDC42|99.0832	9	438	159	38520	http://www.ebi.ac.uk/QuickGO/GTerm?id=GO:0048732	[]
5	5	regulation of humoral immune response	GO:0002920	9.31e-05	0.000716	-0.29	-0.36	12.23	-2.88385	C3|1.4997;C4A|0.673;A2M|7.5858;CD55|0.2535	4	57	159	38520	http://www.ebi.ac.uk/QuickGO/GTerm?id=GO:0002920	[]
4	4	regulation of hormone levels	GO:0010817	9.34e-05	0.000717	9.45	0.64	12.23	-2.88385	ANPEP|12.0226;ENPEP|21.0863;ANXA1|0.2089;MME|5.2481;CPE|4.4055;TTR|1.9055;FGG|3.0479;ACE|2.2909;PLEKHA1|85.5067;KLK6|0.0113	10	543	159	38520	http://www.ebi.ac.uk/QuickGO/GTerm?id=GO:0010817	[]
4	4	carbohydrate metabolic process	GO:0005975	9.69e-05	0.000741	11.91	0.89	12.23	-2.88385	LRP2|0.4365;MGAM|7.379;GAA|14.4544;NAGLU|8.3946;PGK1|6.0256;ENO1|7.8705;GLB1|2.5119;TPI1|15.2757;GAPDH|6.0256;GNS|3.8019;HEXB|2.729;LDHB|8.9536;ALDOA|1.7378;IDH1|2.3335;SORD|1.7219;GLO1|3.1333;FUCA1|12.942;GUSB|0.7311	18	1577	159	38520	http://www.ebi.ac.uk/QuickGO/GTerm?id=GO:0005975	[]
3	3	ovulation cycle	GO:0042698	9.71e-05	0.000742	1.89	-0.13	12.23	-2.88385	ANXA1|0.2089;SOD1|16.1436;SERPINF1|3.2509;MMP7|0.0619;PLEKHA1|85.5067	5	110	159	38520	http://www.ebi.ac.uk/QuickGO/GTerm?id=GO:0042698	[]
7	7	regulation of phosphorylation	GO:0042325	9.85e-05	0.000751	14.87	1.19	12.23	-2.88385	TF|1.2823;C3|1.4997;PSAP|7.656;F2|0.1009;APOA1|18.8799;FBLN1|0.1067;SOD1|16.1436;PRDX1|3.1623;PARK7|5.445;GSTP1|11.8032;DAG1|3.02;FGG|3.0479;TXN|16.4437;SPINK1|0.5012;ELANE|0.4246;ACE|2.2909;ACVR1B|0.1294;FGFR4|6.9823;CDC42|99.0832	19	1726	159	38520	http://www.ebi.ac.uk/QuickGO/GTerm?id=GO:0042325	[]
3	3	regulation of developmental process	GO:0050793	9.95e-05	0.000754	21.28	1.85	12.23	-2.88385	C3|1.4997;EFEMP1|0.0904;SPP1|0.1406;VASN|0.1738;F2|0.1009;APOA1|18.8799;OLFM4|0.2512;KLK3|4.4875;HEXB|2.729;FBLN1|0.1067;SOD1|16.1436;APOH|11.9124;ALDOA|1.7378;SERPINF1|3.2509;ACTN4|10.8643;DAG1|3.02;FGG|3.0479;PNP|7.7983;ACE|2.2909;ACVR1B|0.1294;ARHGDIA|31.3329;CDC42|99.0832;KLK6|0.0113;ECM1|7.9433	24	2504	159	38520	http://www.ebi.ac.uk/QuickGO/GTerm?id=GO:0050793	[]
6	5,6	positive regulation of lipid catabolic process	GO:0050996	0.0001	0.000754	3.62	0.04	12.23	-2.88385	APOA4|15.2757;APOA1|18.8799;FABP1|14.3219	3	22	159	38520	http://www.ebi.ac.uk/QuickGO/GTerm?id=GO:0050996	[]
4	4	antimicrobial peptide production	GO:0002775	0.000101	0.000754	0.56	-0.27	12.23	-2.88385	KLK3|4.4875;MMP7|0.0619	2	4	159	38520	http://www.ebi.ac.uk/QuickGO/GTerm?id=GO:0002775	[]
6	6	multicellular organismal macromolecule catabolic process	GO:0044266	0.000101	0.000754	1.68	-0.16	12.23	-2.88385	ENPEP|21.0863;ACE|2.2909	2	4	159	38520	http://www.ebi.ac.uk/QuickGO/GTerm?id=GO:0044266	[]
5	5	response to lipid hydroperoxide	GO:0006982	0.000101	0.000754	2.36	-0.09	12.23	-2.88385	APOA4|15.2757;GPX3|15.1356	2	4	159	38520	http://www.ebi.ac.uk/QuickGO/GTerm?id=GO:0006982	[]
5	5	antibacterial peptide production	GO:0002778	0.000101	0.000754	0.56	-0.27	12.23	-2.88385	KLK3|4.4875;MMP7|0.0619	2	4	159	38520	http://www.ebi.ac.uk/QuickGO/GTerm?id=GO:0002778	[]
5	5	protein digestion	GO:0044256	0.000101	0.000754	1.68	-0.16	12.23	-2.88385	ENPEP|21.0863;ACE|2.2909	2	4	159	38520	http://www.ebi.ac.uk/QuickGO/GTerm?id=GO:0044256	[]
7	5,7	multicellular organismal protein catabolic process	GO:0044254	0.000101	0.000754	1.68	-0.16	12.23	-2.88385	ENPEP|21.0863;ACE|2.2909	2	4	159	38520	http://www.ebi.ac.uk/QuickGO/GTerm?id=GO:0044254	[]
7	6,7	negative regulation of interleukin-8 secretion	GO:2000483	0.000101	0.000754	0.16	-0.31	12.23	-2.88385	ANXA1|0.2089;ANXA4|3.342	2	4	159	38520	http://www.ebi.ac.uk/QuickGO/GTerm?id=GO:2000483	[]
4	4	adaptive immune response	GO:0002250	0.000103	0.000765	-2.05	-0.54	12.23	-2.88385	C3|1.4997;C4A|0.673;IGHG2|17.378;CD55|0.2535;IGHG1|1.3062;PVRL2|0.0887;P06314|0.1076;IGHG3|3.281;P01594|0.0614	9	444	159	38520	http://www.ebi.ac.uk/QuickGO/GTerm?id=GO:0002250	[]
6	4,5,6	positive regulation of lipid metabolic process	GO:0045834	0.000106	0.000786	6.29	0.32	12.23	-2.88385	APOA4|15.2757;ANXA1|0.2089;APOA1|18.8799;FABP1|14.3219;CDC42|99.0832	5	112	159	38520	http://www.ebi.ac.uk/QuickGO/GTerm?id=GO:0045834	[]
7	7	glucose metabolic process	GO:0006006	0.000107	0.000795	5.28	0.21	12.23	-2.88385	GAA|14.4544;PGK1|6.0256;ENO1|7.8705;TPI1|15.2757;GAPDH|6.0256;ALDOA|1.7378;SORD|1.7219	7	259	159	38520	http://www.ebi.ac.uk/QuickGO/GTerm?id=GO:0006006	[]
4	4	regeneration	GO:0031099	0.000108	0.0008	-0.06	-0.33	12.23	-2.88385	APOA4|15.2757;SPP1|0.1406;ANXA1|0.2089;APOA1|18.8799;APOH|11.9124;KLK6|0.0113	6	180	159	38520	http://www.ebi.ac.uk/QuickGO/GTerm?id=GO:0031099	[]
3	3	single organism signaling	GO:0044700	0.000109	0.000805	47.13	4.5	12.23	-2.88385	LRP2|0.4365;TF|1.2823;C3|1.4997;PIGR|0.7586;FBN1|0.207;ENPEP|21.0863;PSAP|7.656;A2M|7.5858;IGHG2|17.378;EFEMP1|0.0904;APOA4|15.2757;VASN|0.1738;F2|0.1009;CDH1|0.7311;ANXA1|0.2089;APOA1|18.8799;HSPA8|4.3251;OLFM4|0.2512;CD55|0.2535;IGFBP2|0.2754;KLK3|4.4875;ACPP|5.4954;ANXA4|3.342;FBLN1|0.1067;IGHG1|1.3062;CAT|15.417;SOD1|16.1436;CPE|4.4055;PVRL2|0.0887;PRDX1|3.1623;HSPA1B|4.3652;S100A8|0.2965;NOV…	63	9995	159	38520	http://www.ebi.ac.uk/QuickGO/GTerm?id=GO:0044700	[]
8	4,8	signal transduction by protein phosphorylation	GO:0023014	0.00011	0.000813	11.26	0.82	12.23	-2.88385	TF|1.2823;C3|1.4997;PSAP|7.656;APOA1|18.8799;FBLN1|0.1067;SOD1|16.1436;PRDX1|3.1623;GSTP1|11.8032;DAG1|3.02;FGG|3.0479;ELANE|0.4246;ACVR1B|0.1294;FGFR4|6.9823;CDC42|99.0832	14	1038	159	38520	http://www.ebi.ac.uk/QuickGO/GTerm?id=GO:0023014	[]
5	5	chemical homeostasis	GO:0048878	0.000113	0.000833	10.71	0.77	12.23	-2.88385	TF|1.2823;APOA4|15.2757;F2|0.1009;APOA1|18.8799;CD55|0.2535;HEXB|2.729;SOD1|16.1436;LCN2|0.2051;SERPINF1|3.2509;S100A8|0.2965;S100A9|0.3945;GSTP1|11.8032;CKB|3.0761;ELANE|0.4246;FGFR4|6.9823	15	1174	159	38520	http://www.ebi.ac.uk/QuickGO/GTerm?id=GO:0048878	[]
8	5,6,7,8	positive regulation of blood coagulation	GO:0030194	0.000115	0.000842	-1.08	-0.44	12.23	-2.88385	F2|0.1009;APOH|11.9124;S100A9|0.3945	3	23	159	38520	http://www.ebi.ac.uk/QuickGO/GTerm?id=GO:0030194	[]
4	4	positive regulation of hemostasis	GO:1900048	0.000115	0.000842	-1.08	-0.44	12.23	-2.88385	F2|0.1009;APOH|11.9124;S100A9|0.3945	3	23	159	38520	http://www.ebi.ac.uk/QuickGO/GTerm?id=GO:1900048	[]
2	2	signaling	GO:0023052	0.00012	0.000873	47.13	4.5	12.23	-2.88385	LRP2|0.4365;TF|1.2823;C3|1.4997;PIGR|0.7586;FBN1|0.207;ENPEP|21.0863;PSAP|7.656;A2M|7.5858;IGHG2|17.378;EFEMP1|0.0904;APOA4|15.2757;VASN|0.1738;F2|0.1009;CDH1|0.7311;ANXA1|0.2089;APOA1|18.8799;HSPA8|4.3251;OLFM4|0.2512;CD55|0.2535;IGFBP2|0.2754;KLK3|4.4875;ACPP|5.4954;ANXA4|3.342;FBLN1|0.1067;IGHG1|1.3062;CAT|15.417;SOD1|16.1436;CPE|4.4055;PVRL2|0.0887;PRDX1|3.1623;HSPA1B|4.3652;S100A8|0.2965;NOV…	63	10025	159	38520	http://www.ebi.ac.uk/QuickGO/GTerm?id=GO:0023052	[]
5	5	phosphate-containing compound metabolic process	GO:0006796	0.00012	0.000876	30.28	2.77	12.23	-2.88385	TF|1.2823;C3|1.4997;PSAP|7.656;EFEMP1|0.0904;APOA4|15.2757;F2|0.1009;APOA1|18.8799;PGK1|6.0256;ENO1|7.8705;HSPA8|4.3251;TPI1|15.2757;GAPDH|6.0256;ACPP|5.4954;HEXB|2.729;FBLN1|0.1067;LDHB|8.9536;CAT|15.417;SOD1|16.1436;ACP2|2.5823;ALDOA|1.7378;PRDX1|3.1623;IDH1|2.3335;HSPA1B|4.3652;PRDX6|6.9183;PARK7|5.445;GSTP1|11.8032;EPHB4|0.6081;DAG1|3.02;FGG|3.0479;PNP|7.7983;TXN|16.4437;SPINK1|0.5012;CKB|3.0…	41	5563	159	38520	http://www.ebi.ac.uk/QuickGO/GTerm?id=GO:0006796	[]
5	4,5	positive regulation of cellular component organization	GO:0051130	0.000122	0.000888	11.87	0.89	12.23	-2.88385	C3|1.4997;C4A|0.673;ANXA1|0.2089;APOA1|18.8799;OLFM4|0.2512;SERPINF1|3.2509;ACTN4|10.8643;ANXA5|3.6308;PARK7|5.445;FABP1|14.3219;DAG1|3.02;FGG|3.0479;CD63|2.0893;ARHGDIA|31.3329;MYLK|0.6427;CDC42|99.0832	16	1320	159	38520	http://www.ebi.ac.uk/QuickGO/GTerm?id=GO:0051130	[]
7	4,7	regulation of blood pressure	GO:0008217	0.000126	0.000911	4.92	0.18	12.23	-2.88385	ANPEP|12.0226;ENPEP|21.0863;MME|5.2481;HBB|1.6904;SOD1|16.1436;ACE|2.2909	6	185	159	38520	http://www.ebi.ac.uk/QuickGO/GTerm?id=GO:0008217	[]
4	4	system process	GO:0003008	0.000128	0.000925	18.88	1.6	12.23	-2.88385	PIGR|0.7586;ANPEP|12.0226;ENPEP|21.0863;SERPINA3|19.2309;GAA|14.4544;EFEMP1|0.0904;APOA4|15.2757;APOA1|18.8799;MME|5.2481;HBB|1.6904;ACPP|5.4954;HEXB|2.729;HEG1|0.0839;SOD1|16.1436;ALDOA|1.7378;HMCN1|0.0871;SERPINF1|3.2509;FABP1|14.3219;FGG|3.0479;ACE|2.2909;MYLK|0.6427;CDC42|99.0832	22	2224	159	38520	http://www.ebi.ac.uk/QuickGO/GTerm?id=GO:0003008	[]
5	4,5	defense response to other organism	GO:0098542	0.000129	0.000928	-6.16	-0.96	12.23	-2.88385	HP|6.6069;KLK3|4.4875;S100A8|0.2965;LYZ|0.5445;S100A9|0.3945;ANXA5|3.6308;FABP1|14.3219;ELANE|0.4246;MYLK|0.6427;MMP7|0.0619	10	565	159	38520	http://www.ebi.ac.uk/QuickGO/GTerm?id=GO:0098542	[]
8	8	pyruvate metabolic process	GO:0006090	0.000129	0.000928	4.83	0.17	12.23	-2.88385	PGK1|6.0256;ENO1|7.8705;TPI1|15.2757;GAPDH|6.0256;LDHB|8.9536;ALDOA|1.7378	6	186	159	38520	http://www.ebi.ac.uk/QuickGO/GTerm?id=GO:0006090	[]
7	5,7	negative regulation of wound healing	GO:0061045	0.000129	0.000928	3.12	-0.01	12.23	-2.88385	F2|0.1009;APOH|11.9124;ANXA5|3.6308;FGG|3.0479	4	62	159	38520	http://www.ebi.ac.uk/QuickGO/GTerm?id=GO:0061045	[]
6	5,6	cell death in response to oxidative stress	GO:0036473	0.000129	0.000928	4.04	0.09	12.23	-2.88385	PSAP|7.656;SOD1|16.1436;PARK7|5.445;TXN|16.4437	4	62	159	38520	http://www.ebi.ac.uk/QuickGO/GTerm?id=GO:0036473	[]
6	5,6	cellular modified amino acid catabolic process	GO:0042219	0.000131	0.000936	2.08	-0.11	12.23	-2.88385	GGT1|5.2;AHCY|2.6546;GGACT|8.7902	3	24	159	38520	http://www.ebi.ac.uk/QuickGO/GTerm?id=GO:0042219	[]
6	6	chronic inflammatory response	GO:0002544	0.000131	0.000936	-0.42	-0.37	12.23	-2.88385	S100A8|0.2965;S100A9|0.3945;AHCY|2.6546	3	24	159	38520	http://www.ebi.ac.uk/QuickGO/GTerm?id=GO:0002544	[]
9	8,9	ATP metabolic process	GO:0046034	0.000137	0.000975	5.89	0.28	12.23	-2.88385	PGK1|6.0256;ENO1|7.8705;HSPA8|4.3251;TPI1|15.2757;GAPDH|6.0256;ALDOA|1.7378;HSPA1B|4.3652;PARK7|5.445	8	361	159	38520	http://www.ebi.ac.uk/QuickGO/GTerm?id=GO:0046034	[]
5	5	regulation of reactive oxygen species biosynthetic process	GO:1903426	0.000138	0.00098	2.42	-0.08	12.23	-2.88385	HBB|1.6904;ASS1|2.4889;PARK7|5.445;HSP90AA1|11.5878	4	63	159	38520	http://www.ebi.ac.uk/QuickGO/GTerm?id=GO:1903426	[]
6	6	blood circulation	GO:0008015	0.000143	0.00101	8.56	0.55	12.23	-2.88385	ANPEP|12.0226;ENPEP|21.0863;GAA|14.4544;MME|5.2481;HBB|1.6904;SOD1|16.1436;FGG|3.0479;ACE|2.2909;CDC42|99.0832	9	464	159	38520	http://www.ebi.ac.uk/QuickGO/GTerm?id=GO:0008015	[]
4	4	positive regulation of coagulation	GO:0050820	0.000148	0.00105	-1.08	-0.44	12.23	-2.88385	F2|0.1009;APOH|11.9124;S100A9|0.3945	3	25	159	38520	http://www.ebi.ac.uk/QuickGO/GTerm?id=GO:0050820	[]
6	6	ion homeostasis	GO:0050801	0.00015	0.00106	-0.78	-0.41	12.23	-2.88385	TF|1.2823;F2|0.1009;APOA1|18.8799;CD55|0.2535;HEXB|2.729;SOD1|16.1436;LCN2|0.2051;S100A8|0.2965;S100A9|0.3945;CKB|3.0761;ELANE|0.4246;FGFR4|6.9823	12	812	159	38520	http://www.ebi.ac.uk/QuickGO/GTerm?id=GO:0050801	[]
4	4	phosphorus metabolic process	GO:0006793	0.000154	0.00108	30.28	2.77	12.23	-2.88385	TF|1.2823;C3|1.4997;PSAP|7.656;EFEMP1|0.0904;APOA4|15.2757;F2|0.1009;APOA1|18.8799;PGK1|6.0256;ENO1|7.8705;HSPA8|4.3251;TPI1|15.2757;GAPDH|6.0256;ACPP|5.4954;HEXB|2.729;FBLN1|0.1067;LDHB|8.9536;CAT|15.417;SOD1|16.1436;ACP2|2.5823;ALDOA|1.7378;PRDX1|3.1623;IDH1|2.3335;HSPA1B|4.3652;PRDX6|6.9183;PARK7|5.445;GSTP1|11.8032;EPHB4|0.6081;DAG1|3.02;FGG|3.0479;PNP|7.7983;TXN|16.4437;SPINK1|0.5012;CKB|3.0…	41	5625	159	38520	http://www.ebi.ac.uk/QuickGO/GTerm?id=GO:0006793	[]
4	4	macromolecule metabolic process	GO:0043170	0.00016	0.00112	77.57	7.61	12.23	-2.88385	ALB|1.2246;LRP2|0.4365;TF|1.2823;CUBN|0.3597;C3|1.4997;FBN1|0.207;ANPEP|12.0226;C4A|0.673;ENPEP|21.0863;SERPINA1|29.3765;MGAM|7.379;SERPINA3|19.2309;DPP4|4.7424;PSAP|7.656;A2M|7.5858;IGHG2|17.378;GAA|14.4544;EFEMP1|0.0904;APOA4|15.2757;F2|0.1009;GGT1|5.2;SERPINA5|0.2109;CDH1|0.7311;ANXA1|0.2089;SERPINC1|3.4674;APOA1|18.8799;MME|5.2481;ACY1|17.378;NAGLU|8.3946;ENO1|7.8705;GLB1|2.5119;HSPA8|4.3251;…	100	18641	159	38520	http://www.ebi.ac.uk/QuickGO/GTerm?id=GO:0043170	[]
5	4,5	cellular component morphogenesis	GO:0032989	0.00016	0.00112	16.88	1.4	12.23	-2.88385	SPP1|0.1406;VASN|0.1738;F2|0.1009;APOA1|18.8799;HSPA8|4.3251;OLFM4|0.2512;HEXB|2.729;FBLN1|0.1067;HEG1|0.0839;SOD1|16.1436;ALDOA|1.7378;PVRL2|0.0887;ACTN4|10.8643;EPHB4|0.6081;HSP90AA1|11.5878;DAG1|3.02;FGG|3.0479;ARHGDIA|31.3329;CDC42|99.0832	19	1792	159	38520	http://www.ebi.ac.uk/QuickGO/GTerm?id=GO:0032989	[]
5	4,5	positive regulation of cell death	GO:0010942	0.000164	0.00115	7.64	0.45	12.23	-2.88385	HP|6.6069;ANXA1|0.2089;HBB|1.6904;CD248|0.5297;SOD1|16.1436;HBA1|1.6144;S100A8|0.2965;S100A9|0.3945;ANXA5|3.6308;PARK7|5.445;CDC42|99.0832	11	698	159	38520	http://www.ebi.ac.uk/QuickGO/GTerm?id=GO:0010942	[]
7	6,7	response to estradiol	GO:0032355	0.000164	0.00115	1.24	-0.2	12.23	-2.88385	C3|1.4997;ANXA1|0.2089;IGFBP2|0.2754;CAT|15.417;ASS1|2.4889	5	123	159	38520	http://www.ebi.ac.uk/QuickGO/GTerm?id=GO:0032355	[]
9	6,7,8,9	regulation of tumor necrosis factor-mediated signaling pathway	GO:0010803	0.000167	0.00117	2.99	-0.02	12.23	-2.88385	APOA1|18.8799;HSPA1B|4.3652;GSTP1|11.8032	3	26	159	38520	http://www.ebi.ac.uk/QuickGO/GTerm?id=GO:0010803	[]
5	5	multicellular organismal protein metabolic process	GO:0044268	0.000168	0.00117	1.68	-0.16	12.23	-2.88385	ENPEP|21.0863;ACE|2.2909	2	5	159	38520	http://www.ebi.ac.uk/QuickGO/GTerm?id=GO:0044268	[]
6	6	response to estrogen	GO:0043627	0.000177	0.00123	4.28	0.11	12.23	-2.88385	C3|1.4997;ANXA1|0.2089;APOA1|18.8799;IGFBP2|0.2754;CAT|15.417;ASS1|2.4889	6	197	159	38520	http://www.ebi.ac.uk/QuickGO/GTerm?id=GO:0043627	[]
4	4	regulation of protein stability	GO:0031647	0.000177	0.00123	5.54	0.24	12.23	-2.88385	TF|1.2823;APOA1|18.8799;GAPDH|6.0256;HSPA1B|4.3652;PARK7|5.445;CDC42|99.0832	6	197	159	38520	http://www.ebi.ac.uk/QuickGO/GTerm?id=GO:0031647	[]
5	5	response to lipopolysaccharide	GO:0032496	0.000181	0.00125	-3.82	-0.72	12.23	-2.88385	CD55|0.2535;ASS1|2.4889;S100A8|0.2965;S100A9|0.3945;GSTP1|11.8032;SCGB1A1|0.3532;ELANE|0.4246	7	282	159	38520	http://www.ebi.ac.uk/QuickGO/GTerm?id=GO:0032496	[]
4	4	cell junction organization	GO:0034330	0.000181	0.00125	-3.39	-0.68	12.23	-2.88385	CDH1|0.7311;HEG1|0.0839;PVRL2|0.0887;ACTN4|10.8643;ACE|2.2909;FLNC|0.6855;CDC42|99.0832	7	282	159	38520	http://www.ebi.ac.uk/QuickGO/GTerm?id=GO:0034330	[]
5	5	chemokine production	GO:0032602	0.000185	0.00128	-2.38	-0.57	12.23	-2.88385	S100A8|0.2965;S100A9|0.3945;GSTP1|11.8032;ELANE|0.4246	4	68	159	38520	http://www.ebi.ac.uk/QuickGO/GTerm?id=GO:0032602	[]
7	5,6,7	MAPK cascade	GO:0000165	0.000186	0.00128	10.37	0.73	12.23	-2.88385	TF|1.2823;C3|1.4997;PSAP|7.656;APOA1|18.8799;FBLN1|0.1067;SOD1|16.1436;PRDX1|3.1623;GSTP1|11.8032;DAG1|3.02;FGG|3.0479;ELANE|0.4246;FGFR4|6.9823;CDC42|99.0832	13	959	159	38520	http://www.ebi.ac.uk/QuickGO/GTerm?id=GO:0000165	[]
5	5	response to copper ion	GO:0046688	0.00021	0.00144	2.18	-0.1	12.23	-2.88385	SOD1|16.1436;PARK7|5.445;SORD|1.7219	3	28	159	38520	http://www.ebi.ac.uk/QuickGO/GTerm?id=GO:0046688	[]
9	6,7,8,9	regulation of MAPK cascade	GO:0043408	0.000214	0.00147	9.1	0.6	12.23	-2.88385	TF|1.2823;C3|1.4997;PSAP|7.656;FBLN1|0.1067;SOD1|16.1436;PRDX1|3.1623;GSTP1|11.8032;DAG1|3.02;FGG|3.0479;ELANE|0.4246;FGFR4|6.9823;CDC42|99.0832	12	844	159	38520	http://www.ebi.ac.uk/QuickGO/GTerm?id=GO:0043408	[]
5	5	cellular lipid catabolic process	GO:0044242	0.000219	0.0015	5.26	0.21	12.23	-2.88385	APOA4|15.2757;APOA1|18.8799;HEXB|2.729;IDH1|2.3335;PRDX6|6.9183;FABP1|14.3219	6	205	159	38520	http://www.ebi.ac.uk/QuickGO/GTerm?id=GO:0044242	[]
6	5,6	cell morphogenesis	GO:0000902	0.000224	0.00153	15.82	1.29	12.23	-2.88385	SPP1|0.1406;VASN|0.1738;F2|0.1009;APOA1|18.8799;HSPA8|4.3251;OLFM4|0.2512;HEXB|2.729;FBLN1|0.1067;HEG1|0.0839;SOD1|16.1436;ALDOA|1.7378;ACTN4|10.8643;EPHB4|0.6081;HSP90AA1|11.5878;DAG1|3.02;FGG|3.0479;ARHGDIA|31.3329;CDC42|99.0832	18	1688	159	38520	http://www.ebi.ac.uk/QuickGO/GTerm?id=GO:0000902	[]
9	6,7,8,9	fibrinolysis	GO:0042730	0.000233	0.00158	1	-0.23	12.23	-2.88385	F2|0.1009;APOH|11.9124;FGG|3.0479	3	29	159	38520	http://www.ebi.ac.uk/QuickGO/GTerm?id=GO:0042730	[]
5	5	intestinal absorption	GO:0050892	0.000233	0.00158	3.62	0.04	12.23	-2.88385	APOA4|15.2757;APOA1|18.8799;FABP1|14.3219	3	29	159	38520	http://www.ebi.ac.uk/QuickGO/GTerm?id=GO:0050892	[]
7	7	protein refolding	GO:0042026	0.000233	0.00158	2.34	-0.09	12.23	-2.88385	HSPA8|4.3251;HSPA1B|4.3652;HSP90AA1|11.5878	3	29	159	38520	http://www.ebi.ac.uk/QuickGO/GTerm?id=GO:0042026	[]
4	4	response to hormone	GO:0009725	0.000235	0.00159	8.7	0.56	12.23	-2.88385	C3|1.4997;FBN1|0.207;SPP1|0.1406;ANXA1|0.2089;APOA1|18.8799;IGFBP2|0.2754;CAT|15.417;ASS1|2.4889;IDH1|2.3335;SERPINF1|3.2509;SORD|1.7219;DAG1|3.02;SCGB1A1|0.3532;FGFR4|6.9823	14	1117	159	38520	http://www.ebi.ac.uk/QuickGO/GTerm?id=GO:0009725	[]
4	4	cofactor metabolic process	GO:0051186	0.000245	0.00165	7.65	0.45	12.23	-2.88385	PGK1|6.0256;ENO1|7.8705;TPI1|15.2757;GAPDH|6.0256;LDHB|8.9536;BHMT|13.5519;ALDOA|1.7378;IDH1|2.3335;AHCY|2.6546;PNP|7.7983	10	612	159	38520	http://www.ebi.ac.uk/QuickGO/GTerm?id=GO:0051186	[]
4	4	organ morphogenesis	GO:0009887	0.00025	0.00168	3.77	0.06	12.23	-2.88385	FBN1|0.207;GAA|14.4544;KRT13|0.278;EFEMP1|0.0904;NAGLU|8.3946;HEG1|0.0839;SOD1|16.1436;CPE|4.4055;EPHB4|0.6081;DAG1|3.02;MYLK|0.6427;PLEKHA1|85.5067;CDC42|99.0832	13	989	159	38520	http://www.ebi.ac.uk/QuickGO/GTerm?id=GO:0009887	[]
6	5,6	positive regulation of metalloenzyme activity	GO:0048554	0.000251	0.00168	2.84	-0.04	12.23	-2.88385	FGFR4|6.9823;CDC42|99.0832	2	6	159	38520	http://www.ebi.ac.uk/QuickGO/GTerm?id=GO:0048554	[]
7	5,6,7	negative regulation of extracellular matrix organization	GO:1903054	0.000251	0.00168	1.31	-0.19	12.23	-2.88385	DPP4|4.7424;HSPA8|4.3251	2	6	159	38520	http://www.ebi.ac.uk/QuickGO/GTerm?id=GO:1903054	[]
5	5	response to ozone	GO:0010193	0.000251	0.00168	-0.74	-0.4	12.23	-2.88385	CAT|15.417;SCGB1A1|0.3532	2	6	159	38520	http://www.ebi.ac.uk/QuickGO/GTerm?id=GO:0010193	[]
5	4,5	regulation of cell activation	GO:0050865	0.000252	0.00169	-4.77	-0.82	12.23	-2.88385	DPP4|4.7424;F2|0.1009;CD55|0.2535;IGFBP2|0.2754;SOD1|16.1436;PVRL2|0.0887;PNP|7.7983;SCGB1A1|0.3532;CDC42|99.0832	9	501	159	38520	http://www.ebi.ac.uk/QuickGO/GTerm?id=GO:0050865	[]
6	6	immune response-regulating cell surface receptor signaling pathway	GO:0002768	0.000258	0.00172	10.01	0.7	12.23	-2.88385	PIGR|0.7586;IGHG2|17.378;IGHG1|1.3062;P06314|0.1076;HSP90AA1|11.5878;IGHG3|3.281;P01594|0.0614;FGFR4|6.9823;PLEKHA1|85.5067;CDC42|99.0832	10	616	159	38520	http://www.ebi.ac.uk/QuickGO/GTerm?id=GO:0002768	[]
7	6,7	oxygen transport	GO:0015671	0.000258	0.00172	2.09	-0.11	12.23	-2.88385	HBB|1.6904;HBA1|1.6144;HBD|45.2898	3	30	159	38520	http://www.ebi.ac.uk/QuickGO/GTerm?id=GO:0015671	[]
7	5,6,7	negative regulation of oxidative stress-induced cell death	GO:1903202	0.000258	0.00172	2.84	-0.04	12.23	-2.88385	PSAP|7.656;PARK7|5.445;TXN|16.4437	3	30	159	38520	http://www.ebi.ac.uk/QuickGO/GTerm?id=GO:1903202	[]
3	3	locomotory behavior	GO:0007626	0.000263	0.00174	5.14	0.2	12.23	-2.88385	DPP4|4.7424;GAA|14.4544;NAGLU|8.3946;HEXB|2.729;SOD1|16.1436;PARK7|5.445	6	212	159	38520	http://www.ebi.ac.uk/QuickGO/GTerm?id=GO:0007626	[]
7	6,7	regulation of phosphate metabolic process	GO:0019220	0.000267	0.00177	15.24	1.23	12.23	-2.88385	TF|1.2823;C3|1.4997;PSAP|7.656;F2|0.1009;APOA1|18.8799;FBLN1|0.1067;SOD1|16.1436;PRDX1|3.1623;IDH1|2.3335;PARK7|5.445;GSTP1|11.8032;DAG1|3.02;FGG|3.0479;TXN|16.4437;SPINK1|0.5012;ELANE|0.4246;ACE|2.2909;ACVR1B|0.1294;FGFR4|6.9823;CDC42|99.0832	20	2023	159	38520	http://www.ebi.ac.uk/QuickGO/GTerm?id=GO:0019220	[]
7	5,7	response to molecule of bacterial origin	GO:0002237	0.000269	0.00178	-3.82	-0.72	12.23	-2.88385	CD55|0.2535;ASS1|2.4889;S100A8|0.2965;S100A9|0.3945;GSTP1|11.8032;SCGB1A1|0.3532;ELANE|0.4246	7	301	159	38520	http://www.ebi.ac.uk/QuickGO/GTerm?id=GO:0002237	[]
5	4,5	modification of morphology or physiology of other organism involved in symbiotic interaction	GO:0051817	0.00027	0.00178	0.78	-0.25	12.23	-2.88385	ALB|1.2246;FBLN1|0.1067;DAG1|3.02;ELANE|0.4246	4	75	159	38520	http://www.ebi.ac.uk/QuickGO/GTerm?id=GO:0051817	[]
5	4,5	regulation of cellular metabolic process	GO:0031323	0.000277	0.00182	44.55	4.23	12.23	-2.88385	TF|1.2823;C3|1.4997;FBN1|0.207;C4A|0.673;SERPINA1|29.3765;SERPINA3|19.2309;PSAP|7.656;A2M|7.5858;HP|6.6069;EFEMP1|0.0904;APOA4|15.2757;F2|0.1009;SERPINA5|0.2109;CDH1|0.7311;ANXA1|0.2089;SERPINC1|3.4674;APOA1|18.8799;ENO1|7.8705;HSPA8|4.3251;GAPDH|6.0256;HBB|1.6904;CD55|0.2535;FBLN5|0.2249;HEXB|2.729;ANXA4|3.342;FBLN1|0.1067;CAT|15.417;SOD1|16.1436;PEBP1|6.7298;BHMT|13.5519;ASS1|2.4889;PRDX1|3.162…	61	9878	159	38520	http://www.ebi.ac.uk/QuickGO/GTerm?id=GO:0031323	[]
7	6,7	regulation of T cell activation	GO:0050863	0.00028	0.00184	1.61	-0.16	12.23	-2.88385	DPP4|4.7424;CD55|0.2535;IGFBP2|0.2754;SOD1|16.1436;PNP|7.7983;SCGB1A1|0.3532;CDC42|99.0832	7	303	159	38520	http://www.ebi.ac.uk/QuickGO/GTerm?id=GO:0050863	[]
4	3,4	regulation of metabolic process	GO:0019222	0.000281	0.00184	52.03	5	12.23	-2.88385	TF|1.2823;C3|1.4997;FBN1|0.207;ANPEP|12.0226;C4A|0.673;ENPEP|21.0863;SERPINA1|29.3765;SERPINA3|19.2309;PSAP|7.656;A2M|7.5858;HP|6.6069;EFEMP1|0.0904;APOA4|15.2757;F2|0.1009;SERPINA5|0.2109;CDH1|0.7311;ANXA1|0.2089;SERPINC1|3.4674;APOA1|18.8799;MME|5.2481;ENO1|7.8705;HSPA8|4.3251;GAPDH|6.0256;HBB|1.6904;CD55|0.2535;FBLN5|0.2249;HEXB|2.729;ANXA4|3.342;FBLN1|0.1067;CAT|15.417;SOD1|16.1436;APOH|11.91…	68	11404	159	38520	http://www.ebi.ac.uk/QuickGO/GTerm?id=GO:0019222	[]
6	6	nucleotide metabolic process	GO:0009117	0.000283	0.00185	11.12	0.81	12.23	-2.88385	PGK1|6.0256;ENO1|7.8705;HSPA8|4.3251;TPI1|15.2757;GAPDH|6.0256;ACPP|5.4954;LDHB|8.9536;CAT|15.417;ALDOA|1.7378;IDH1|2.3335;HSPA1B|4.3652;PARK7|5.445;PNP|7.7983;BPNT1|12.2462	14	1138	159	38520	http://www.ebi.ac.uk/QuickGO/GTerm?id=GO:0009117	[]
7	5,7	defense response to fungus	GO:0050832	0.000285	0.00186	-1.3	-0.46	12.23	-2.88385	S100A8|0.2965;S100A9|0.3945;ELANE|0.4246	3	31	159	38520	http://www.ebi.ac.uk/QuickGO/GTerm?id=GO:0050832	[]
8	8	purine ribonucleoside triphosphate metabolic process	GO:0009205	0.000288	0.00187	5.89	0.28	12.23	-2.88385	PGK1|6.0256;ENO1|7.8705;HSPA8|4.3251;TPI1|15.2757;GAPDH|6.0256;ALDOA|1.7378;HSPA1B|4.3652;PARK7|5.445	8	403	159	38520	http://www.ebi.ac.uk/QuickGO/GTerm?id=GO:0009205	[]
10	9,10	cellular transition metal ion homeostasis	GO:0046916	0.00029	0.00188	-1.32	-0.46	12.23	-2.88385	TF|1.2823;SOD1|16.1436;LCN2|0.2051;S100A8|0.2965;S100A9|0.3945	5	139	159	38520	http://www.ebi.ac.uk/QuickGO/GTerm?id=GO:0046916	[]
6	5,6	regulation of phosphorus metabolic process	GO:0051174	0.00029	0.00188	15.24	1.23	12.23	-2.88385	TF|1.2823;C3|1.4997;PSAP|7.656;F2|0.1009;APOA1|18.8799;FBLN1|0.1067;SOD1|16.1436;PRDX1|3.1623;IDH1|2.3335;PARK7|5.445;GSTP1|11.8032;DAG1|3.02;FGG|3.0479;TXN|16.4437;SPINK1|0.5012;ELANE|0.4246;ACE|2.2909;ACVR1B|0.1294;FGFR4|6.9823;CDC42|99.0832	20	2036	159	38520	http://www.ebi.ac.uk/QuickGO/GTerm?id=GO:0051174	[]
4	4	response to acid chemical	GO:0001101	0.000291	0.00189	1.57	-0.17	12.23	-2.88385	KRT13|0.278;IGFBP2|0.2754;CAT|15.417;ASS1|2.4889;SERPINF1|3.2509;SCGB1A1|0.3532;FGFR4|6.9823	7	305	159	38520	http://www.ebi.ac.uk/QuickGO/GTerm?id=GO:0001101	[]
7	6,7	cellular ion homeostasis	GO:0006873	0.000297	0.00192	-5.82	-0.92	12.23	-2.88385	TF|1.2823;F2|0.1009;CD55|0.2535;HEXB|2.729;SOD1|16.1436;LCN2|0.2051;S100A8|0.2965;S100A9|0.3945;CKB|3.0761;ELANE|0.4246	10	627	159	38520	http://www.ebi.ac.uk/QuickGO/GTerm?id=GO:0006873	[]
5	5	ameboidal-type cell migration	GO:0001667	0.000297	0.00192	2.44	-0.08	12.23	-2.88385	DPP4|4.7424;APOA1|18.8799;APOH|11.9124;SERPINF1|3.2509;SH3BGRL3|0.0461;EPHB4|0.6081;ACVR1B|0.1294	7	306	159	38520	http://www.ebi.ac.uk/QuickGO/GTerm?id=GO:0001667	[]
5	5	sulfur amino acid metabolic process	GO:0000096	0.000299	0.00192	3.5	0.03	12.23	-2.88385	GGT1|5.2;BHMT|13.5519;CNDP2|17.0608;AHCY|2.6546	4	77	159	38520	http://www.ebi.ac.uk/QuickGO/GTerm?id=GO:0000096	[]
3	3	positive regulation of metabolic process	GO:0009893	0.000299	0.00192	27.24	2.46	12.23	-2.88385	TF|1.2823;C3|1.4997;PSAP|7.656;APOA4|15.2757;F2|0.1009;CDH1|0.7311;ANXA1|0.2089;APOA1|18.8799;HSPA8|4.3251;HBB|1.6904;HEXB|2.729;FBLN1|0.1067;CAT|15.417;SOD1|16.1436;APOH|11.9124;ASS1|2.4889;HSPA1B|4.3652;S100A8|0.2965;SH3BGRL3|0.0461;S100A9|0.3945;ANXA5|3.6308;PARK7|5.445;GSTP1|11.8032;FABP1|14.3219;HSP90AA1|11.5878;FGG|3.0479;TXN|16.4437;CD63|2.0893;ELANE|0.4246;ACE|2.2909;ACVR1B|0.1294;ARHGDIA…	35	4656	159	38520	http://www.ebi.ac.uk/QuickGO/GTerm?id=GO:0009893	[]
6	6	epithelial cell migration	GO:0010631	0.000305	0.00195	5.09	0.19	12.23	-2.88385	DPP4|4.7424;APOA1|18.8799;APOH|11.9124;SERPINF1|3.2509;SH3BGRL3|0.0461;EPHB4|0.6081	6	218	159	38520	http://www.ebi.ac.uk/QuickGO/GTerm?id=GO:0010631	[]
7	7	inorganic ion homeostasis	GO:0098771	0.000306	0.00196	-3.08	-0.64	12.23	-2.88385	TF|1.2823;F2|0.1009;CD55|0.2535;HEXB|2.729;SOD1|16.1436;LCN2|0.2051;S100A8|0.2965;S100A9|0.3945;CKB|3.0761;ELANE|0.4246;FGFR4|6.9823	11	751	159	38520	http://www.ebi.ac.uk/QuickGO/GTerm?id=GO:0098771	[]
7	7	ribonucleoside triphosphate metabolic process	GO:0009199	0.000317	0.00203	5.89	0.28	12.23	-2.88385	PGK1|6.0256;ENO1|7.8705;HSPA8|4.3251;TPI1|15.2757;GAPDH|6.0256;ALDOA|1.7378;HSPA1B|4.3652;PARK7|5.445	8	409	159	38520	http://www.ebi.ac.uk/QuickGO/GTerm?id=GO:0009199	[]
7	7	mucopolysaccharide metabolic process	GO:1903510	0.00032	0.00204	2.39	-0.08	12.23	-2.88385	GLB1|2.5119;GNS|3.8019;HEXB|2.729;ITIH1|6.9183;GUSB|0.7311	5	142	159	38520	http://www.ebi.ac.uk/QuickGO/GTerm?id=GO:1903510	[]
5	5	nucleoside phosphate metabolic process	GO:0006753	0.000326	0.00207	11.12	0.81	12.23	-2.88385	PGK1|6.0256;ENO1|7.8705;HSPA8|4.3251;TPI1|15.2757;GAPDH|6.0256;ACPP|5.4954;LDHB|8.9536;CAT|15.417;ALDOA|1.7378;IDH1|2.3335;HSPA1B|4.3652;PARK7|5.445;PNP|7.7983;BPNT1|12.2462	14	1154	159	38520	http://www.ebi.ac.uk/QuickGO/GTerm?id=GO:0006753	[]
5	5	epithelium migration	GO:0090132	0.000328	0.00208	5.09	0.19	12.23	-2.88385	DPP4|4.7424;APOA1|18.8799;APOH|11.9124;SERPINF1|3.2509;SH3BGRL3|0.0461;EPHB4|0.6081	6	221	159	38520	http://www.ebi.ac.uk/QuickGO/GTerm?id=GO:0090132	[]
7	7	purine nucleoside triphosphate metabolic process	GO:0009144	0.000328	0.00208	5.89	0.28	12.23	-2.88385	PGK1|6.0256;ENO1|7.8705;HSPA8|4.3251;TPI1|15.2757;GAPDH|6.0256;ALDOA|1.7378;HSPA1B|4.3652;PARK7|5.445	8	411	159	38520	http://www.ebi.ac.uk/QuickGO/GTerm?id=GO:0009144	[]
8	8	purine ribonucleoside monophosphate metabolic process	GO:0009167	0.000333	0.00211	5.89	0.28	12.23	-2.88385	PGK1|6.0256;ENO1|7.8705;HSPA8|4.3251;TPI1|15.2757;GAPDH|6.0256;ALDOA|1.7378;HSPA1B|4.3652;PARK7|5.445	8	412	159	38520	http://www.ebi.ac.uk/QuickGO/GTerm?id=GO:0009167	[]
5	5	peptide metabolic process	GO:0006518	0.000337	0.00213	13.12	1.01	12.23	-2.88385	ANPEP|12.0226;ENPEP|21.0863;GGT1|5.2;MME|5.2481;GAPDH|6.0256;SOD1|16.1436;CPE|4.4055;IDH1|2.3335;GSTA2|18.5353;S100A9|0.3945;CNDP2|17.0608;GSTP1|11.8032;GLO1|3.1333;ACE|2.2909;MMP7|0.0619;APEH|1.7378	16	1445	159	38520	http://www.ebi.ac.uk/QuickGO/GTerm?id=GO:0006518	[]
7	7	purine nucleoside monophosphate metabolic process	GO:0009126	0.000339	0.00213	5.89	0.28	12.23	-2.88385	PGK1|6.0256;ENO1|7.8705;HSPA8|4.3251;TPI1|15.2757;GAPDH|6.0256;ALDOA|1.7378;HSPA1B|4.3652;PARK7|5.445	8	413	159	38520	http://www.ebi.ac.uk/QuickGO/GTerm?id=GO:0009126	[]
4	4	regulation of multicellular organismal development	GO:2000026	0.000341	0.00214	17.51	1.46	12.23	-2.88385	C3|1.4997;EFEMP1|0.0904;SPP1|0.1406;VASN|0.1738;F2|0.1009;APOA1|18.8799;KLK3|4.4875;SOD1|16.1436;APOH|11.9124;SERPINF1|3.2509;DAG1|3.02;PNP|7.7983;ACE|2.2909;ACVR1B|0.1294;ARHGDIA|31.3329;CDC42|99.0832;KLK6|0.0113;ECM1|7.9433	18	1748	159	38520	http://www.ebi.ac.uk/QuickGO/GTerm?id=GO:2000026	[]
6	5,6	regulation of triglyceride metabolic process	GO:0090207	0.000344	0.00215	2.64	-0.06	12.23	-2.88385	C3|1.4997;APOA4|15.2757;APOA1|18.8799	3	33	159	38520	http://www.ebi.ac.uk/QuickGO/GTerm?id=GO:0090207	[]
6	5,6	keratan sulfate metabolic process	GO:0042339	0.000344	0.00215	1.42	-0.18	12.23	-2.88385	GLB1|2.5119;GNS|3.8019;HEXB|2.729	3	33	159	38520	http://www.ebi.ac.uk/QuickGO/GTerm?id=GO:0042339	[]
5	4,5	negative regulation of cellular component movement	GO:0051271	0.000344	0.00215	5.57	0.24	12.23	-2.88385	FBLN1|0.1067;APOH|11.9124;SERPINF1|3.2509;ACTN4|10.8643;DAG1|3.02;ARHGDIA|31.3329	6	223	159	38520	http://www.ebi.ac.uk/QuickGO/GTerm?id=GO:0051271	[]
9	8,9	cellular metal ion homeostasis	GO:0006875	0.000345	0.00215	-5.34	-0.87	12.23	-2.88385	TF|1.2823;F2|0.1009;CD55|0.2535;HEXB|2.729;SOD1|16.1436;LCN2|0.2051;S100A8|0.2965;S100A9|0.3945;ELANE|0.4246	9	523	159	38520	http://www.ebi.ac.uk/QuickGO/GTerm?id=GO:0006875	[]
6	6	regulation of steroid metabolic process	GO:0019218	0.000346	0.00216	4.51	0.13	12.23	-2.88385	APOA4|15.2757;APOA1|18.8799;SOD1|16.1436;FGFR4|6.9823	4	80	159	38520	http://www.ebi.ac.uk/QuickGO/GTerm?id=GO:0019218	[]
7	5,7	regulation of removal of superoxide radicals	GO:2000121	0.000351	0.00216	-0.09	-0.34	12.23	-2.88385	FBLN5|0.2249;PARK7|5.445	2	7	159	38520	http://www.ebi.ac.uk/QuickGO/GTerm?id=GO:2000121	[]
4	4	protein oxidation	GO:0018158	0.000351	0.00216	2.01	-0.12	12.23	-2.88385	APOA1|18.8799;PARK7|5.445	2	7	159	38520	http://www.ebi.ac.uk/QuickGO/GTerm?id=GO:0018158	[]
10	6,7,8,9,10	positive regulation of oxidative stress-induced intrinsic apoptotic signaling pathway	GO:1902177	0.000351	0.00216	1.94	-0.13	12.23	-2.88385	SOD1|16.1436;PARK7|5.445	2	7	159	38520	http://www.ebi.ac.uk/QuickGO/GTerm?id=GO:1902177	[]
8	6,7,8	positive regulation of apoptotic cell clearance	GO:2000427	0.000351	0.00216	0	-0.33	12.23	-2.88385	C3|1.4997;C4A|0.673	2	7	159	38520	http://www.ebi.ac.uk/QuickGO/GTerm?id=GO:2000427	[]
6	6	post-embryonic eye morphogenesis	GO:0048050	0.000351	0.00216	-1.73	-0.5	12.23	-2.88385	FBN1|0.207;EFEMP1|0.0904	2	7	159	38520	http://www.ebi.ac.uk/QuickGO/GTerm?id=GO:0048050	[]
8	5,6,7,8	negative regulation of protein export from nucleus	GO:0046826	0.000351	0.00216	1.95	-0.13	12.23	-2.88385	PARK7|5.445;TXN|16.4437	2	7	159	38520	http://www.ebi.ac.uk/QuickGO/GTerm?id=GO:0046826	[]
6	6	lytic vacuole organization	GO:0080171	0.000363	0.00223	2.93	-0.03	12.23	-2.88385	GAA|14.4544;NAGLU|8.3946;HEXB|2.729;ACP2|2.5823	4	81	159	38520	http://www.ebi.ac.uk/QuickGO/GTerm?id=GO:0080171	[]
7	7	lysosome organization	GO:0007040	0.000363	0.00223	2.93	-0.03	12.23	-2.88385	GAA|14.4544;NAGLU|8.3946;HEXB|2.729;ACP2|2.5823	4	81	159	38520	http://www.ebi.ac.uk/QuickGO/GTerm?id=GO:0007040	[]
7	6,7	regulation of fatty acid biosynthetic process	GO:0042304	0.000376	0.0023	0.68	-0.26	12.23	-2.88385	APOA4|15.2757;ANXA1|0.2089;APOA1|18.8799	3	34	159	38520	http://www.ebi.ac.uk/QuickGO/GTerm?id=GO:0042304	[]
6	5,6	gas transport	GO:0015669	0.000376	0.0023	2.09	-0.11	12.23	-2.88385	HBB|1.6904;HBA1|1.6144;HBD|45.2898	3	34	159	38520	http://www.ebi.ac.uk/QuickGO/GTerm?id=GO:0015669	[]
4	4	tissue migration	GO:0090130	0.000378	0.00231	5.09	0.19	12.23	-2.88385	DPP4|4.7424;APOA1|18.8799;APOH|11.9124;SERPINF1|3.2509;SH3BGRL3|0.0461;EPHB4|0.6081	6	227	159	38520	http://www.ebi.ac.uk/QuickGO/GTerm?id=GO:0090130	[]
7	4,6,7	negative regulation of protein transport	GO:0051224	0.000387	0.00236	5.4	0.23	12.23	-2.88385	ANXA1|0.2089;APOA1|18.8799;ANXA4|3.342;FBLN1|0.1067;PARK7|5.445;TXN|16.4437	6	228	159	38520	http://www.ebi.ac.uk/QuickGO/GTerm?id=GO:0051224	[]
7	6,7	regulation of homotypic cell-cell adhesion	GO:0034110	0.000389	0.00236	1.61	-0.16	12.23	-2.88385	DPP4|4.7424;CD55|0.2535;IGFBP2|0.2754;SOD1|16.1436;PNP|7.7983;SCGB1A1|0.3532;CDC42|99.0832	7	320	159	38520	http://www.ebi.ac.uk/QuickGO/GTerm?id=GO:0034110	[]
5	5	immune response-regulating signaling pathway	GO:0002764	0.000399	0.00242	10.65	0.76	12.23	-2.88385	PIGR|0.7586;IGHG2|17.378;IGHG1|1.3062;HSPA1B|4.3652;P06314|0.1076;HSP90AA1|11.5878;IGHG3|3.281;P01594|0.0614;FGFR4|6.9823;PLEKHA1|85.5067;CDC42|99.0832	11	775	159	38520	http://www.ebi.ac.uk/QuickGO/GTerm?id=GO:0002764	[]
7	5,6,7	regulation of protein transport	GO:0051223	0.000399	0.00242	9.4	0.63	12.23	-2.88385	CDH1|0.7311;ANXA1|0.2089;APOA1|18.8799;ANXA4|3.342;FBLN1|0.1067;PPIA|7.5858;PRDX1|3.1623;PARK7|5.445;FGG|3.0479;TXN|16.4437;CDC42|99.0832	11	775	159	38520	http://www.ebi.ac.uk/QuickGO/GTerm?id=GO:0051223	[]
6	6	purine nucleotide metabolic process	GO:0006163	0.000408	0.00247	9.06	0.6	12.23	-2.88385	PGK1|6.0256;ENO1|7.8705;HSPA8|4.3251;TPI1|15.2757;GAPDH|6.0256;CAT|15.417;ALDOA|1.7378;HSPA1B|4.3652;PARK7|5.445;PNP|7.7983;BPNT1|12.2462	11	777	159	38520	http://www.ebi.ac.uk/QuickGO/GTerm?id=GO:0006163	[]
6	5,6	positive regulation of cell morphogenesis involved in differentiation	GO:0010770	0.000411	0.00248	5.85	0.27	12.23	-2.88385	APOA1|18.8799;OLFM4|0.2512;FGG|3.0479;ARHGDIA|31.3329;CDC42|99.0832	5	150	159	38520	http://www.ebi.ac.uk/QuickGO/GTerm?id=GO:0010770	[]
6	6	regulation of fatty acid metabolic process	GO:0019217	0.000436	0.00263	4.3	0.11	12.23	-2.88385	APOA4|15.2757;ANXA1|0.2089;APOA1|18.8799;FABP1|14.3219	4	85	159	38520	http://www.ebi.ac.uk/QuickGO/GTerm?id=GO:0019217	[]
6	5,6	cellular chemical homeostasis	GO:0055082	0.000444	0.00267	-2.75	-0.61	12.23	-2.88385	TF|1.2823;F2|0.1009;CD55|0.2535;HEXB|2.729;SOD1|16.1436;LCN2|0.2051;SERPINF1|3.2509;S100A8|0.2965;S100A9|0.3945;CKB|3.0761;ELANE|0.4246	11	785	159	38520	http://www.ebi.ac.uk/QuickGO/GTerm?id=GO:0055082	[]
6	5,6	intracellular signal transduction	GO:0035556	0.000447	0.00269	24.73	2.2	12.23	-2.88385	TF|1.2823;C3|1.4997;PSAP|7.656;A2M|7.5858;F2|0.1009;CDH1|0.7311;APOA1|18.8799;OLFM4|0.2512;KLK3|4.4875;FBLN1|0.1067;CAT|15.417;SOD1|16.1436;PRDX1|3.1623;HSPA1B|4.3652;S100A8|0.2965;ACTN4|10.8643;S100A9|0.3945;PARK7|5.445;GSTP1|11.8032;DAG1|3.02;FGG|3.0479;TXN|16.4437;SPINK1|0.5012;ELANE|0.4246;SHISA5|0.2965;ARHGDIA|31.3329;MYLK|0.6427;FGFR4|6.9823;PLEKHA1|85.5067;CDC42|99.0832;ECM1|7.9433	31	4012	159	38520	http://www.ebi.ac.uk/QuickGO/GTerm?id=GO:0035556	[]
5	5	glycolytic process	GO:0006096	0.00045	0.0027	3.88	0.07	12.23	-2.88385	PGK1|6.0256;ENO1|7.8705;TPI1|15.2757;GAPDH|6.0256;ALDOA|1.7378	5	153	159	38520	http://www.ebi.ac.uk/QuickGO/GTerm?id=GO:0006096	[]
10	8,9,10	ATP generation from ADP	GO:0006757	0.000464	0.00278	3.88	0.07	12.23	-2.88385	PGK1|6.0256;ENO1|7.8705;TPI1|15.2757;GAPDH|6.0256;ALDOA|1.7378	5	154	159	38520	http://www.ebi.ac.uk/QuickGO/GTerm?id=GO:0006757	[]
11	5,6,10,11	sequestering of zinc ion	GO:0032119	0.000466	0.00278	-0.93	-0.42	12.23	-2.88385	S100A8|0.2965;S100A9|0.3945	2	8	159	38520	http://www.ebi.ac.uk/QuickGO/GTerm?id=GO:0032119	[]
6	6	positive regulation of triglyceride catabolic process	GO:0010898	0.000466	0.00278	2.46	-0.08	12.23	-2.88385	APOA4|15.2757;APOA1|18.8799	2	8	159	38520	http://www.ebi.ac.uk/QuickGO/GTerm?id=GO:0010898	[]
8	6,7,8	positive regulation of superoxide anion generation	GO:0032930	0.000466	0.00278	2.28	-0.09	12.23	-2.88385	SOD1|16.1436;GSTP1|11.8032	2	8	159	38520	http://www.ebi.ac.uk/QuickGO/GTerm?id=GO:0032930	[]
6	5,6	positive regulation of nitric oxide metabolic process	GO:1904407	0.000484	0.00286	1.69	-0.16	12.23	-2.88385	HBB|1.6904;ASS1|2.4889;HSP90AA1|11.5878	3	37	159	38520	http://www.ebi.ac.uk/QuickGO/GTerm?id=GO:1904407	[]
5	5	modification by symbiont of host morphology or physiology	GO:0044003	0.000484	0.00286	0.97	-0.23	12.23	-2.88385	ALB|1.2246;FBLN1|0.1067;DAG1|3.02	3	37	159	38520	http://www.ebi.ac.uk/QuickGO/GTerm?id=GO:0044003	[]
7	6,7	positive regulation of nitric oxide biosynthetic process	GO:0045429	0.000484	0.00286	1.69	-0.16	12.23	-2.88385	HBB|1.6904;ASS1|2.4889;HSP90AA1|11.5878	3	37	159	38520	http://www.ebi.ac.uk/QuickGO/GTerm?id=GO:0045429	[]
7	7	ribonucleoside monophosphate metabolic process	GO:0009161	0.000484	0.00286	5.89	0.28	12.23	-2.88385	PGK1|6.0256;ENO1|7.8705;HSPA8|4.3251;TPI1|15.2757;GAPDH|6.0256;ALDOA|1.7378;HSPA1B|4.3652;PARK7|5.445	8	436	159	38520	http://www.ebi.ac.uk/QuickGO/GTerm?id=GO:0009161	[]
7	7	peptidyl-amino acid modification	GO:0018193	0.000485	0.00286	14.5	1.16	12.23	-2.88385	EFEMP1|0.0904;F2|0.1009;APOA1|18.8799;GLB1|2.5119;GAPDH|6.0256;PROZ|13.0617;PPIA|7.5858;S100A8|0.2965;S100A9|0.3945;PARK7|5.445;EPHB4|0.6081;TXN|16.4437;SPINK1|0.5012;ACE|2.2909;ACVR1B|0.1294;PPIC|3.342;FGFR4|6.9823;CDC42|99.0832	18	1801	159	38520	http://www.ebi.ac.uk/QuickGO/GTerm?id=GO:0018193	[]
3	3	developmental process involved in reproduction	GO:0003006	0.000492	0.00289	8.81	0.57	12.23	-2.88385	PSAP|7.656;SPP1|0.1406;ANXA1|0.2089;HEXB|2.729;SOD1|16.1436;PVRL2|0.0887;IDH1|2.3335;SERPINF1|3.2509;ACVR1B|0.1294;PLEKHA1|85.5067	10	669	159	38520	http://www.ebi.ac.uk/QuickGO/GTerm?id=GO:0003006	[]
2	2	rhythmic process	GO:0048511	0.000492	0.00289	6.89	0.38	12.23	-2.88385	ANXA1|0.2089;NAGLU|8.3946;SOD1|16.1436;SERPINF1|3.2509;AHCY|2.6546;MMP7|0.0619;PLEKHA1|85.5067	7	333	159	38520	http://www.ebi.ac.uk/QuickGO/GTerm?id=GO:0048511	[]
8	8	retinoid metabolic process	GO:0001523	0.000498	0.00292	3.1	-0.01	12.23	-2.88385	LRP2|0.4365;APOA4|15.2757;APOA1|18.8799;TTR|1.9055	4	88	159	38520	http://www.ebi.ac.uk/QuickGO/GTerm?id=GO:0001523	[]
5	5	cell-matrix adhesion	GO:0007160	0.000507	0.00297	-0.1	-0.34	12.23	-2.88385	NID1|0.4093;FBLN5|0.2249;MADCAM1|0.7178;DAG1|3.02;FGG|3.0479;CD63|2.0893	6	240	159	38520	http://www.ebi.ac.uk/QuickGO/GTerm?id=GO:0007160	[]
3	3	multicellular organismal reproductive process	GO:0048609	0.000509	0.00298	4.47	0.13	12.23	-2.88385	SPP1|0.1406;GGT1|5.2;SERPINA5|0.2109;ANXA1|0.2089;HEXB|2.729;SOD1|16.1436;PVRL2|0.0887;SERPINF1|3.2509;ACE|2.2909;MMP7|0.0619;PLEKHA1|85.5067	11	798	159	38520	http://www.ebi.ac.uk/QuickGO/GTerm?id=GO:0048609	[]
6	6	glycolipid metabolic process	GO:0006664	0.000521	0.00304	3.61	0.04	12.23	-2.88385	PSAP|7.656;GLB1|2.5119;ARSA|15.8489;HEXB|2.729;ASAH1|4.9204	5	158	159	38520	http://www.ebi.ac.uk/QuickGO/GTerm?id=GO:0006664	[]
3	3	cellular localization	GO:0051641	0.000529	0.00308	24.46	2.18	12.23	-2.88385	ALB|1.2246;TF|1.2823;PIGR|0.7586;SERPINA1|29.3765;PSAP|7.656;A2M|7.5858;GAA|14.4544;F2|0.1009;CDH1|0.7311;ANXA1|0.2089;APOA1|18.8799;HSPA8|4.3251;FBLN5|0.2249;ANXA4|3.342;FBLN1|0.1067;SOD1|16.1436;CPE|4.4055;ALDOA|1.7378;PPIA|7.5858;PVRL2|0.0887;PRDX1|3.1623;LCN2|0.2051;ACTN4|10.8643;MADCAM1|0.7178;PARK7|5.445;HSP90AA1|11.5878;DAG1|3.02;FGG|3.0479;PNP|7.7983;TXN|16.4437;SPINK1|0.5012;CD63|2.0893;…	33	4423	159	38520	http://www.ebi.ac.uk/QuickGO/GTerm?id=GO:0051641	[]
6	6	nucleoside triphosphate metabolic process	GO:0009141	0.000545	0.00317	5.89	0.28	12.23	-2.88385	PGK1|6.0256;ENO1|7.8705;HSPA8|4.3251;TPI1|15.2757;GAPDH|6.0256;ALDOA|1.7378;HSPA1B|4.3652;PARK7|5.445	8	444	159	38520	http://www.ebi.ac.uk/QuickGO/GTerm?id=GO:0009141	[]
5	5	sulfur compound biosynthetic process	GO:0044272	0.000565	0.00326	5.84	0.27	12.23	-2.88385	GGT1|5.2;BHMT|13.5519;GSTA2|18.5353;CNDP2|17.0608;GSTP1|11.8032;AHCY|2.6546	6	245	159	38520	http://www.ebi.ac.uk/QuickGO/GTerm?id=GO:0044272	[]
5	5	cell-cell junction organization	GO:0045216	0.000565	0.00326	-1.13	-0.44	12.23	-2.88385	CDH1|0.7311;HEG1|0.0839;PVRL2|0.0887;ACTN4|10.8643;ACE|2.2909;CDC42|99.0832	6	245	159	38520	http://www.ebi.ac.uk/QuickGO/GTerm?id=GO:0045216	[]
3	3	negative regulation of locomotion	GO:0040013	0.000565	0.00326	4.91	0.17	12.23	-2.88385	FBLN1|0.1067;APOH|11.9124;SERPINF1|3.2509;DAG1|3.02;ELANE|0.4246;ARHGDIA|31.3329	6	245	159	38520	http://www.ebi.ac.uk/QuickGO/GTerm?id=GO:0040013	[]
6	6	neutrophil migration	GO:1990266	0.000565	0.00326	-2.38	-0.57	12.23	-2.88385	SPP1|0.1406;OLFM4|0.2512;S100A8|0.2965;S100A9|0.3945	4	91	159	38520	http://www.ebi.ac.uk/QuickGO/GTerm?id=GO:1990266	[]
5	5	endocrine process	GO:0050886	0.000565	0.00326	3.48	0.03	12.23	-2.88385	ANPEP|12.0226;ENPEP|21.0863;MME|5.2481;ACE|2.2909	4	91	159	38520	http://www.ebi.ac.uk/QuickGO/GTerm?id=GO:0050886	[]
8	8	triglyceride catabolic process	GO:0019433	0.000565	0.00326	3.62	0.04	12.23	-2.88385	APOA4|15.2757;APOA1|18.8799;FABP1|14.3219	3	39	159	38520	http://www.ebi.ac.uk/QuickGO/GTerm?id=GO:0019433	[]
5	5	liposaccharide metabolic process	GO:1903509	0.000568	0.00326	3.61	0.04	12.23	-2.88385	PSAP|7.656;GLB1|2.5119;ARSA|15.8489;HEXB|2.729;ASAH1|4.9204	5	161	159	38520	http://www.ebi.ac.uk/QuickGO/GTerm?id=GO:1903509	[]
5	3,5	positive regulation of homeostatic process	GO:0032846	0.000568	0.00326	-3.52	-0.69	12.23	-2.88385	TF|1.2823;SPP1|0.1406;F2|0.1009;ANXA1|0.2089;ACVR1B|0.1294	5	161	159	38520	http://www.ebi.ac.uk/QuickGO/GTerm?id=GO:0032846	[]
6	6	phosphorylation	GO:0016310	0.000575	0.00329	21.99	1.92	12.23	-2.88385	TF|1.2823;C3|1.4997;PSAP|7.656;EFEMP1|0.0904;F2|0.1009;APOA1|18.8799;PGK1|6.0256;ENO1|7.8705;TPI1|15.2757;GAPDH|6.0256;FBLN1|0.1067;SOD1|16.1436;ALDOA|1.7378;PRDX1|3.1623;PARK7|5.445;GSTP1|11.8032;EPHB4|0.6081;DAG1|3.02;FGG|3.0479;TXN|16.4437;SPINK1|0.5012;CKB|3.0761;ELANE|0.4246;ACE|2.2909;ACVR1B|0.1294;MYLK|0.6427;CPNE3|1.6293;BPNT1|12.2462;FGFR4|6.9823;CDC42|99.0832	30	3888	159	38520	http://www.ebi.ac.uk/QuickGO/GTerm?id=GO:0016310	[]
5	5	organic hydroxy compound biosynthetic process	GO:1901617	0.000577	0.0033	6.52	0.34	12.23	-2.88385	APOA4|15.2757;APOA1|18.8799;SOD1|16.1436;PARK7|5.445;DDT|18.5353;FGFR4|6.9823	6	246	159	38520	http://www.ebi.ac.uk/QuickGO/GTerm?id=GO:1901617	[]
5	5	cytokine secretion	GO:0050663	0.000584	0.00333	1.65	-0.16	12.23	-2.88385	ANXA1|0.2089;APOA1|18.8799;ANXA4|3.342;FBLN1|0.1067;PNP|7.7983	5	162	159	38520	http://www.ebi.ac.uk/QuickGO/GTerm?id=GO:0050663	[]
6	4,5,6	disaccharide metabolic process	GO:0005984	0.000598	0.00338	2.03	-0.12	12.23	-2.88385	MGAM|7.379;GAA|14.4544	2	9	159	38520	http://www.ebi.ac.uk/QuickGO/GTerm?id=GO:0005984	[]
3	3	negative regulation of fibrinolysis	GO:0051918	0.000598	0.00338	-0.08	-0.34	12.23	-2.88385	F2|0.1009;APOH|11.9124	2	9	159	38520	http://www.ebi.ac.uk/QuickGO/GTerm?id=GO:0051918	[]
7	5,6,7	regulation of intestinal absorption	GO:1904478	0.000598	0.00338	2.46	-0.08	12.23	-2.88385	APOA4|15.2757;APOA1|18.8799	2	9	159	38520	http://www.ebi.ac.uk/QuickGO/GTerm?id=GO:1904478	[]
8	6,7,8	regulation of intestinal cholesterol absorption	GO:0030300	0.000598	0.00338	2.46	-0.08	12.23	-2.88385	APOA4|15.2757;APOA1|18.8799	2	9	159	38520	http://www.ebi.ac.uk/QuickGO/GTerm?id=GO:0030300	[]
8	5,6,7,8	positive regulation of cholesterol esterification	GO:0010873	0.000598	0.00338	2.46	-0.08	12.23	-2.88385	APOA4|15.2757;APOA1|18.8799	2	9	159	38520	http://www.ebi.ac.uk/QuickGO/GTerm?id=GO:0010873	[]
7	7	monocarboxylic acid biosynthetic process	GO:0072330	0.000602	0.0034	5.44	0.23	12.23	-2.88385	APOA4|15.2757;GGT1|5.2;ANXA1|0.2089;APOA1|18.8799;PARK7|5.445;FGFR4|6.9823	6	248	159	38520	http://www.ebi.ac.uk/QuickGO/GTerm?id=GO:0072330	[]
8	7,8	positive regulation of protein phosphorylation	GO:0001934	0.000604	0.00341	10.27	0.72	12.23	-2.88385	TF|1.2823;C3|1.4997;PSAP|7.656;F2|0.1009;SOD1|16.1436;PARK7|5.445;FGG|3.0479;TXN|16.4437;ELANE|0.4246;ACE|2.2909;ACVR1B|0.1294;FGFR4|6.9823;CDC42|99.0832	13	1086	159	38520	http://www.ebi.ac.uk/QuickGO/GTerm?id=GO:0001934	[]
6	6	response to cadmium ion	GO:0046686	0.000609	0.00342	2.63	-0.06	12.23	-2.88385	CAT|15.417;SOD1|16.1436;SORD|1.7219	3	40	159	38520	http://www.ebi.ac.uk/QuickGO/GTerm?id=GO:0046686	[]
7	4,5,6,7	negative regulation of signal transduction	GO:0009968	0.000611	0.00342	12.83	0.99	12.23	-2.88385	FBN1|0.207;VASN|0.1738;APOA1|18.8799;OLFM4|0.2512;FBLN1|0.1067;HSPA1B|4.3652;PARK7|5.445;GSTP1|11.8032;DAG1|3.02;FGG|3.0479;SPINK1|0.5012;PLEKHA1|85.5067;CDC42|99.0832;ECM1|7.9433	14	1230	159	38520	http://www.ebi.ac.uk/QuickGO/GTerm?id=GO:0009968	[]
6	5,6	neuron development	GO:0048666	0.000611	0.00342	13.93	1.1	12.23	-2.88385	APOA4|15.2757;SPP1|0.1406;CDH1|0.7311;APOA1|18.8799;NAGLU|8.3946;HSPA8|4.3251;SOD1|16.1436;SERPINF1|3.2509;EPHB4|0.6081;HSP90AA1|11.5878;DAG1|3.02;ARHGDIA|31.3329;CDC42|99.0832;KLK6|0.0113	14	1230	159	38520	http://www.ebi.ac.uk/QuickGO/GTerm?id=GO:0048666	[]
6	5,6	cellular modified amino acid biosynthetic process	GO:0042398	0.000613	0.00342	3.11	-0.01	12.23	-2.88385	GGT1|5.2;PARK7|5.445;CNDP2|17.0608;AHCY|2.6546	4	93	159	38520	http://www.ebi.ac.uk/QuickGO/GTerm?id=GO:0042398	[]
7	7	diterpenoid metabolic process	GO:0016101	0.000613	0.00342	3.1	-0.01	12.23	-2.88385	LRP2|0.4365;APOA4|15.2757;APOA1|18.8799;TTR|1.9055	4	93	159	38520	http://www.ebi.ac.uk/QuickGO/GTerm?id=GO:0016101	[]
4	3,4	modification of morphology or physiology of other organism	GO:0035821	0.000613	0.00342	0.78	-0.25	12.23	-2.88385	ALB|1.2246;FBLN1|0.1067;DAG1|3.02;ELANE|0.4246	4	93	159	38520	http://www.ebi.ac.uk/QuickGO/GTerm?id=GO:0035821	[]
8	5,8	regulation of systemic arterial blood pressure	GO:0003073	0.000613	0.00342	3.48	0.03	12.23	-2.88385	ANPEP|12.0226;ENPEP|21.0863;MME|5.2481;ACE|2.2909	4	93	159	38520	http://www.ebi.ac.uk/QuickGO/GTerm?id=GO:0003073	[]
8	6,8	alpha-amino acid biosynthetic process	GO:1901607	0.000617	0.00343	3.4	0.02	12.23	-2.88385	GGT1|5.2;BHMT|13.5519;ASS1|2.4889;PARK7|5.445;AHCY|2.6546	5	164	159	38520	http://www.ebi.ac.uk/QuickGO/GTerm?id=GO:1901607	[]
9	8,9	ADP metabolic process	GO:0046031	0.000617	0.00343	3.88	0.07	12.23	-2.88385	PGK1|6.0256;ENO1|7.8705;TPI1|15.2757;GAPDH|6.0256;ALDOA|1.7378	5	164	159	38520	http://www.ebi.ac.uk/QuickGO/GTerm?id=GO:0046031	[]
7	6,7	phototransduction, visible light	GO:0007603	0.000639	0.00354	3.1	-0.01	12.23	-2.88385	LRP2|0.4365;APOA4|15.2757;APOA1|18.8799;TTR|1.9055	4	94	159	38520	http://www.ebi.ac.uk/QuickGO/GTerm?id=GO:0007603	[]
5	5	cell junction assembly	GO:0034329	0.000641	0.00355	-3.82	-0.72	12.23	-2.88385	CDH1|0.7311;HEG1|0.0839;PVRL2|0.0887;ACTN4|10.8643;ACE|2.2909;FLNC|0.6855	6	251	159	38520	http://www.ebi.ac.uk/QuickGO/GTerm?id=GO:0034329	[]
7	7	cell-type specific apoptotic process	GO:0097285	0.000649	0.00358	7.24	0.41	12.23	-2.88385	ANXA1|0.2089;GAPDH|6.0256;CD248|0.5297;SOD1|16.1436;APOH|11.9124;PARK7|5.445;FGG|3.0479;CDC42|99.0832	8	456	159	38520	http://www.ebi.ac.uk/QuickGO/GTerm?id=GO:0097285	[]
3	3	multicellular organism reproduction	GO:0032504	0.000649	0.00358	4.47	0.13	12.23	-2.88385	SPP1|0.1406;GGT1|5.2;SERPINA5|0.2109;ANXA1|0.2089;HEXB|2.729;SOD1|16.1436;PVRL2|0.0887;SERPINF1|3.2509;ACE|2.2909;MMP7|0.0619;PLEKHA1|85.5067	11	822	159	38520	http://www.ebi.ac.uk/QuickGO/GTerm?id=GO:0032504	[]
2	2	reproduction	GO:0000003	0.000652	0.00359	4.77	0.16	12.23	-2.88385	SPP1|0.1406;GGT1|5.2;SERPINA5|0.2109;ANXA1|0.2089;HEXB|2.729;SOD1|16.1436;PVRL2|0.0887;SERPINF1|3.2509;PARK7|5.445;SPINK1|0.5012;ACE|2.2909;MMP7|0.0619;PLEKHA1|85.5067	13	1095	159	38520	http://www.ebi.ac.uk/QuickGO/GTerm?id=GO:0000003	[]
8	6,8	sulfur amino acid biosynthetic process	GO:0000097	0.000656	0.00361	2.27	-0.1	12.23	-2.88385	GGT1|5.2;BHMT|13.5519;AHCY|2.6546	3	41	159	38520	http://www.ebi.ac.uk/QuickGO/GTerm?id=GO:0000097	[]
4	4	regulation of protein localization	GO:0032880	0.000668	0.00367	10.9	0.79	12.23	-2.88385	CDH1|0.7311;ANXA1|0.2089;APOA1|18.8799;ANXA4|3.342;FBLN1|0.1067;PPIA|7.5858;PRDX1|3.1623;PARK7|5.445;FGG|3.0479;TXN|16.4437;ARHGDIA|31.3329;CDC42|99.0832	12	959	159	38520	http://www.ebi.ac.uk/QuickGO/GTerm?id=GO:0032880	[]
7	7	zymogen activation	GO:0031638	0.00067	0.00367	0.93	-0.23	12.23	-2.88385	GGT1|5.2;APOH|11.9124;S100A8|0.2965;S100A9|0.3945;FGG|3.0479	5	167	159	38520	http://www.ebi.ac.uk/QuickGO/GTerm?id=GO:0031638	[]
6	6	nucleoside monophosphate metabolic process	GO:0009123	0.000677	0.00371	5.89	0.28	12.23	-2.88385	PGK1|6.0256;ENO1|7.8705;HSPA8|4.3251;TPI1|15.2757;GAPDH|6.0256;ALDOA|1.7378;HSPA1B|4.3652;PARK7|5.445	8	459	159	38520	http://www.ebi.ac.uk/QuickGO/GTerm?id=GO:0009123	[]
4	3,4	developmental growth	GO:0048589	0.000688	0.00376	4.56	0.14	12.23	-2.88385	C3|1.4997;PSAP|7.656;SPP1|0.1406;ANXA1|0.2089;HEG1|0.0839;SOD1|16.1436;PLEKHA1|85.5067;CDC42|99.0832;KLK6|0.0113	9	576	159	38520	http://www.ebi.ac.uk/QuickGO/GTerm?id=GO:0048589	[]
5	5	digestive system process	GO:0022600	0.000691	0.00377	4.9	0.17	12.23	-2.88385	SERPINA3|19.2309;APOA4|15.2757;APOA1|18.8799;FABP1|14.3219	4	96	159	38520	http://www.ebi.ac.uk/QuickGO/GTerm?id=GO:0022600	[]
7	5,6,7	positive regulation of interleukin-8 production	GO:0032757	0.000704	0.00383	0.37	-0.29	12.23	-2.88385	HSPA1B|4.3652;PARK7|5.445;ELANE|0.4246	3	42	159	38520	http://www.ebi.ac.uk/QuickGO/GTerm?id=GO:0032757	[]
5	5	negative regulation of cytokine-mediated signaling pathway	GO:0001960	0.000704	0.00383	3.25	0	12.23	-2.88385	APOA1|18.8799;GSTP1|11.8032;ECM1|7.9433	3	42	159	38520	http://www.ebi.ac.uk/QuickGO/GTerm?id=GO:0001960	[]
8	8	purine ribonucleoside diphosphate metabolic process	GO:0009179	0.000707	0.00383	3.88	0.07	12.23	-2.88385	PGK1|6.0256;ENO1|7.8705;TPI1|15.2757;GAPDH|6.0256;ALDOA|1.7378	5	169	159	38520	http://www.ebi.ac.uk/QuickGO/GTerm?id=GO:0009179	[]
7	7	purine nucleoside diphosphate metabolic process	GO:0009135	0.000707	0.00383	3.88	0.07	12.23	-2.88385	PGK1|6.0256;ENO1|7.8705;TPI1|15.2757;GAPDH|6.0256;ALDOA|1.7378	5	169	159	38520	http://www.ebi.ac.uk/QuickGO/GTerm?id=GO:0009135	[]
6	5,6	positive regulation of cell-cell adhesion	GO:0022409	0.000711	0.00384	5.2	0.2	12.23	-2.88385	DPP4|4.7424;CD55|0.2535;IGFBP2|0.2754;FGG|3.0479;PNP|7.7983;CDC42|99.0832	6	256	159	38520	http://www.ebi.ac.uk/QuickGO/GTerm?id=GO:0022409	[]
4	4	regulation of cell differentiation	GO:0045595	0.000713	0.00385	8.06	0.5	12.23	-2.88385	EFEMP1|0.0904;SPP1|0.1406;VASN|0.1738;F2|0.1009;APOA1|18.8799;OLFM4|0.2512;FBLN1|0.1067;SOD1|16.1436;SERPINF1|3.2509;ACTN4|10.8643;DAG1|3.02;FGG|3.0479;PNP|7.7983;ACVR1B|0.1294;ARHGDIA|31.3329;CDC42|99.0832;KLK6|0.0113	17	1704	159	38520	http://www.ebi.ac.uk/QuickGO/GTerm?id=GO:0045595	[]
7	7	ribonucleoside diphosphate metabolic process	GO:0009185	0.000745	0.004	3.88	0.07	12.23	-2.88385	PGK1|6.0256;ENO1|7.8705;TPI1|15.2757;GAPDH|6.0256;ALDOA|1.7378	5	171	159	38520	http://www.ebi.ac.uk/QuickGO/GTerm?id=GO:0009185	[]
6	5,6	positive regulation of oxidative stress-induced cell death	GO:1903209	0.000746	0.004	1.94	-0.13	12.23	-2.88385	SOD1|16.1436;PARK7|5.445	2	10	159	38520	http://www.ebi.ac.uk/QuickGO/GTerm?id=GO:1903209	[]
5	5	post-embryonic organ morphogenesis	GO:0048563	0.000746	0.004	-1.73	-0.5	12.23	-2.88385	FBN1|0.207;EFEMP1|0.0904	2	10	159	38520	http://www.ebi.ac.uk/QuickGO/GTerm?id=GO:0048563	[]
8	7,8	regulation of apoptotic cell clearance	GO:2000425	0.000746	0.004	0	-0.33	12.23	-2.88385	C3|1.4997;C4A|0.673	2	10	159	38520	http://www.ebi.ac.uk/QuickGO/GTerm?id=GO:2000425	[]
6	6	neutral lipid catabolic process	GO:0046461	0.000754	0.00403	3.62	0.04	12.23	-2.88385	APOA4|15.2757;APOA1|18.8799;FABP1|14.3219	3	43	159	38520	http://www.ebi.ac.uk/QuickGO/GTerm?id=GO:0046461	[]
7	7	acylglycerol catabolic process	GO:0046464	0.000754	0.00403	3.62	0.04	12.23	-2.88385	APOA4|15.2757;APOA1|18.8799;FABP1|14.3219	3	43	159	38520	http://www.ebi.ac.uk/QuickGO/GTerm?id=GO:0046464	[]
6	6	beta-amyloid metabolic process	GO:0050435	0.000754	0.00403	1.32	-0.19	12.23	-2.88385	MME|5.2481;ACE|2.2909;APEH|1.7378	3	43	159	38520	http://www.ebi.ac.uk/QuickGO/GTerm?id=GO:0050435	[]
9	9	transition metal ion homeostasis	GO:0055076	0.000765	0.00408	-1.32	-0.46	12.23	-2.88385	TF|1.2823;SOD1|16.1436;LCN2|0.2051;S100A8|0.2965;S100A9|0.3945	5	172	159	38520	http://www.ebi.ac.uk/QuickGO/GTerm?id=GO:0055076	[]
6	5,6	regulation of establishment of protein localization	GO:0070201	0.000767	0.00409	9.4	0.63	12.23	-2.88385	CDH1|0.7311;ANXA1|0.2089;APOA1|18.8799;ANXA4|3.342;FBLN1|0.1067;PPIA|7.5858;PRDX1|3.1623;PARK7|5.445;FGG|3.0479;TXN|16.4437;CDC42|99.0832	11	839	159	38520	http://www.ebi.ac.uk/QuickGO/GTerm?id=GO:0070201	[]
6	4,5,6	regulation of leukocyte activation	GO:0002694	0.000789	0.00419	-2.11	-0.54	12.23	-2.88385	DPP4|4.7424;CD55|0.2535;IGFBP2|0.2754;SOD1|16.1436;PVRL2|0.0887;PNP|7.7983;SCGB1A1|0.3532;CDC42|99.0832	8	470	159	38520	http://www.ebi.ac.uk/QuickGO/GTerm?id=GO:0002694	[]
8	7,8	positive regulation of phosphorylation	GO:0042327	0.000841	0.00446	10.27	0.72	12.23	-2.88385	TF|1.2823;C3|1.4997;PSAP|7.656;F2|0.1009;SOD1|16.1436;PARK7|5.445;FGG|3.0479;TXN|16.4437;ELANE|0.4246;ACE|2.2909;ACVR1B|0.1294;FGFR4|6.9823;CDC42|99.0832	13	1126	159	38520	http://www.ebi.ac.uk/QuickGO/GTerm?id=GO:0042327	[]
6	4,6	response to fungus	GO:0009620	0.000862	0.00457	-1.3	-0.46	12.23	-2.88385	S100A8|0.2965;S100A9|0.3945;ELANE|0.4246	3	45	159	38520	http://www.ebi.ac.uk/QuickGO/GTerm?id=GO:0009620	[]
7	5,7	cellular amino acid biosynthetic process	GO:0008652	0.000892	0.00472	3.4	0.02	12.23	-2.88385	GGT1|5.2;BHMT|13.5519;ASS1|2.4889;PARK7|5.445;AHCY|2.6546	5	178	159	38520	http://www.ebi.ac.uk/QuickGO/GTerm?id=GO:0008652	[]
7	6,7	regulation of extracellular matrix disassembly	GO:0010715	0.000909	0.00476	1.52	-0.17	12.23	-2.88385	DPP4|4.7424;FGFR4|6.9823	2	11	159	38520	http://www.ebi.ac.uk/QuickGO/GTerm?id=GO:0010715	[]
6	6	response to phenylpropanoid	GO:0080184	0.000909	0.00476	2.37	-0.09	12.23	-2.88385	APOA4|15.2757;CAT|15.417	2	11	159	38520	http://www.ebi.ac.uk/QuickGO/GTerm?id=GO:0080184	[]
8	5,6,8	high-density lipoprotein particle assembly	GO:0034380	0.000909	0.00476	2.46	-0.08	12.23	-2.88385	APOA4|15.2757;APOA1|18.8799	2	11	159	38520	http://www.ebi.ac.uk/QuickGO/GTerm?id=GO:0034380	[]
7	5,6,7	regulation of cholesterol esterification	GO:0010872	0.000909	0.00476	2.46	-0.08	12.23	-2.88385	APOA4|15.2757;APOA1|18.8799	2	11	159	38520	http://www.ebi.ac.uk/QuickGO/GTerm?id=GO:0010872	[]
8	5,6,7,8	negative regulation of substrate adhesion-dependent cell spreading	GO:1900025	0.000909	0.00476	-0.06	-0.33	12.23	-2.88385	FBLN1|0.1067;ACTN4|10.8643	2	11	159	38520	http://www.ebi.ac.uk/QuickGO/GTerm?id=GO:1900025	[]
4	4	leukocyte migration involved in inflammatory response	GO:0002523	0.000909	0.00476	-0.93	-0.42	12.23	-2.88385	S100A8|0.2965;S100A9|0.3945	2	11	159	38520	http://www.ebi.ac.uk/QuickGO/GTerm?id=GO:0002523	[]
4	4	positive regulation of biosynthetic process	GO:0009891	0.000911	0.00476	14.1	1.12	12.23	-2.88385	TF|1.2823;APOA4|15.2757;F2|0.1009;CDH1|0.7311;ANXA1|0.2089;APOA1|18.8799;HBB|1.6904;HEXB|2.729;CAT|15.417;ASS1|2.4889;HSPA1B|4.3652;S100A8|0.2965;S100A9|0.3945;PARK7|5.445;HSP90AA1|11.5878;ELANE|0.4246;ACVR1B|0.1294;FGFR4|6.9823;CDC42|99.0832	19	2065	159	38520	http://www.ebi.ac.uk/QuickGO/GTerm?id=GO:0009891	[]
4	4	negative regulation of response to cytokine stimulus	GO:0060761	0.00092	0.0048	3.25	0	12.23	-2.88385	APOA1|18.8799;GSTP1|11.8032;ECM1|7.9433	3	46	159	38520	http://www.ebi.ac.uk/QuickGO/GTerm?id=GO:0060761	[]
6	6	terpenoid metabolic process	GO:0006721	0.000933	0.00486	3.1	-0.01	12.23	-2.88385	LRP2|0.4365;APOA4|15.2757;APOA1|18.8799;TTR|1.9055	4	104	159	38520	http://www.ebi.ac.uk/QuickGO/GTerm?id=GO:0006721	[]
9	6,7,8,9	negative regulation of extrinsic apoptotic signaling pathway	GO:2001237	0.000933	0.00486	2.93	-0.03	12.23	-2.88385	HSPA1B|4.3652;PARK7|5.445;GSTP1|11.8032;FGG|3.0479	4	104	159	38520	http://www.ebi.ac.uk/QuickGO/GTerm?id=GO:2001237	[]
5	5	carbohydrate biosynthetic process	GO:0016051	0.000936	0.00487	4.12	0.09	12.23	-2.88385	PGK1|6.0256;ENO1|7.8705;TPI1|15.2757;GAPDH|6.0256;ALDOA|1.7378;SORD|1.7219	6	270	159	38520	http://www.ebi.ac.uk/QuickGO/GTerm?id=GO:0016051	[]
4	4	fertilization	GO:0009566	0.000938	0.00487	-1.17	-0.45	12.23	-2.88385	SERPINA5|0.2109;HEXB|2.729;PVRL2|0.0887;PARK7|5.445;SPINK1|0.5012	5	180	159	38520	http://www.ebi.ac.uk/QuickGO/GTerm?id=GO:0009566	[]
5	5	granulocyte migration	GO:0097530	0.000967	0.00501	-2.38	-0.57	12.23	-2.88385	SPP1|0.1406;OLFM4|0.2512;S100A8|0.2965;S100A9|0.3945	4	105	159	38520	http://www.ebi.ac.uk/QuickGO/GTerm?id=GO:0097530	[]
5	5	response to zinc ion	GO:0010043	0.000979	0.00506	-0.4	-0.37	12.23	-2.88385	ASS1|2.4889;S100A8|0.2965;S100A9|0.3945	3	47	159	38520	http://www.ebi.ac.uk/QuickGO/GTerm?id=GO:0010043	[]
5	5	glycosyl compound catabolic process	GO:1901658	0.000979	0.00506	2.43	-0.08	12.23	-2.88385	AHCY|2.6546;PNP|7.7983;FUCA1|12.942	3	47	159	38520	http://www.ebi.ac.uk/QuickGO/GTerm?id=GO:1901658	[]
8	8	metal ion homeostasis	GO:0055065	0.000994	0.00513	-5.34	-0.87	12.23	-2.88385	TF|1.2823;F2|0.1009;CD55|0.2535;HEXB|2.729;SOD1|16.1436;LCN2|0.2051;S100A8|0.2965;S100A9|0.3945;ELANE|0.4246	9	607	159	38520	http://www.ebi.ac.uk/QuickGO/GTerm?id=GO:0055065	[]
7	7	regulation of protein processing	GO:0070613	0.001	0.00515	-0.29	-0.36	12.23	-2.88385	C3|1.4997;C4A|0.673;A2M|7.5858;CD55|0.2535	4	106	159	38520	http://www.ebi.ac.uk/QuickGO/GTerm?id=GO:0070613	[]
6	6	regulation of protein maturation	GO:1903317	0.001	0.00515	-0.29	-0.36	12.23	-2.88385	C3|1.4997;C4A|0.673;A2M|7.5858;CD55|0.2535	4	106	159	38520	http://www.ebi.ac.uk/QuickGO/GTerm?id=GO:1903317	[]
6	4,6	response to hypoxia	GO:0001666	0.00101	0.00518	5.24	0.21	12.23	-2.88385	DPP4|4.7424;VASN|0.1738;CAT|15.417;ACTN4|10.8643;FABP1|14.3219;AHCY|2.6546	6	274	159	38520	http://www.ebi.ac.uk/QuickGO/GTerm?id=GO:0001666	[]
5	5	negative regulation of cell development	GO:0010721	0.00103	0.00527	-6.11	-0.95	12.23	-2.88385	SPP1|0.1406;VASN|0.1738;F2|0.1009;FBLN1|0.1067;ACTN4|10.8643;ARHGDIA|31.3329	6	275	159	38520	http://www.ebi.ac.uk/QuickGO/GTerm?id=GO:0010721	[]
5	5	T cell activation	GO:0042110	0.00103	0.00527	-2.48	-0.58	12.23	-2.88385	DPP4|4.7424;ANXA1|0.2089;CD55|0.2535;IGFBP2|0.2754;SOD1|16.1436;PNP|7.7983;SCGB1A1|0.3532;CDC42|99.0832	8	490	159	38520	http://www.ebi.ac.uk/QuickGO/GTerm?id=GO:0042110	[]
4	4	T cell aggregation	GO:0070489	0.00103	0.00527	-2.48	-0.58	12.23	-2.88385	DPP4|4.7424;ANXA1|0.2089;CD55|0.2535;IGFBP2|0.2754;SOD1|16.1436;PNP|7.7983;SCGB1A1|0.3532;CDC42|99.0832	8	490	159	38520	http://www.ebi.ac.uk/QuickGO/GTerm?id=GO:0070489	[]
4	4	positive regulation of response to external stimulus	GO:0032103	0.00103	0.00527	1.12	-0.21	12.23	-2.88385	C3|1.4997;S100A8|0.2965;S100A9|0.3945;ANXA5|3.6308;PARK7|5.445;FABP1|14.3219;MYLK|0.6427	7	378	159	38520	http://www.ebi.ac.uk/QuickGO/GTerm?id=GO:0032103	[]
5	5	nervous system development	GO:0007399	0.00104	0.00527	20.59	1.78	12.23	-2.88385	LRP2|0.4365;APOA4|15.2757;SPP1|0.1406;F2|0.1009;CDH1|0.7311;ANXA1|0.2089;APOA1|18.8799;NAGLU|8.3946;HSPA8|4.3251;HEXB|2.729;SOD1|16.1436;SERPINF1|3.2509;GSTP1|11.8032;SERPINI1|4.4875;EPHB4|0.6081;HSP90AA1|11.5878;DAG1|3.02;CKB|3.0761;ACVR1B|0.1294;ARHGDIA|31.3329;BPNT1|12.2462;CDC42|99.0832;KLK6|0.0113	23	2767	159	38520	http://www.ebi.ac.uk/QuickGO/GTerm?id=GO:0007399	[]
6	5,6	vitamin transport	GO:0051180	0.00104	0.0053	0.44	-0.28	12.23	-2.88385	CUBN|0.3597;APOA1|18.8799;AFM|8.6298	3	48	159	38520	http://www.ebi.ac.uk/QuickGO/GTerm?id=GO:0051180	[]
8	7,8	lymphocyte aggregation	GO:0071593	0.00104	0.0053	-2.48	-0.58	12.23	-2.88385	DPP4|4.7424;ANXA1|0.2089;CD55|0.2535;IGFBP2|0.2754;SOD1|16.1436;PNP|7.7983;SCGB1A1|0.3532;CDC42|99.0832	8	491	159	38520	http://www.ebi.ac.uk/QuickGO/GTerm?id=GO:0071593	[]
5	5	sphingolipid metabolic process	GO:0006665	0.00106	0.00537	3.61	0.04	12.23	-2.88385	PSAP|7.656;GLB1|2.5119;ARSA|15.8489;HEXB|2.729;ASAH1|4.9204	5	185	159	38520	http://www.ebi.ac.uk/QuickGO/GTerm?id=GO:0006665	[]
4	4	post-embryonic development	GO:0009791	0.00107	0.00543	-4.74	-0.81	12.23	-2.88385	FBN1|0.207;EFEMP1|0.0904;HEG1|0.0839;PLEKHA1|85.5067	4	108	159	38520	http://www.ebi.ac.uk/QuickGO/GTerm?id=GO:0009791	[]
6	6	detection of visible light	GO:0009584	0.00107	0.00543	3.1	-0.01	12.23	-2.88385	LRP2|0.4365;APOA4|15.2757;APOA1|18.8799;TTR|1.9055	4	108	159	38520	http://www.ebi.ac.uk/QuickGO/GTerm?id=GO:0009584	[]
6	6	epithelial cell differentiation	GO:0030855	0.00108	0.00543	8.56	0.55	12.23	-2.88385	PSAP|7.656;ANXA1|0.2089;PGK1|6.0256;ANXA4|3.342;HEG1|0.0839;SOD1|16.1436;GSTA2|18.5353;MADCAM1|0.7178;CDC42|99.0832	9	614	159	38520	http://www.ebi.ac.uk/QuickGO/GTerm?id=GO:0030855	[]
6	5,6	homocysteine metabolic process	GO:0050667	0.00109	0.00544	1.56	-0.17	12.23	-2.88385	BHMT|13.5519;AHCY|2.6546	2	12	159	38520	http://www.ebi.ac.uk/QuickGO/GTerm?id=GO:0050667	[]
4	4	positive regulation of response to oxidative stress	GO:1902884	0.00109	0.00544	1.94	-0.13	12.23	-2.88385	SOD1|16.1436;PARK7|5.445	2	12	159	38520	http://www.ebi.ac.uk/QuickGO/GTerm?id=GO:1902884	[]
7	6,7	regulation of triglyceride catabolic process	GO:0010896	0.00109	0.00544	2.46	-0.08	12.23	-2.88385	APOA4|15.2757;APOA1|18.8799	2	12	159	38520	http://www.ebi.ac.uk/QuickGO/GTerm?id=GO:0010896	[]
5	5	lactate metabolic process	GO:0006089	0.00109	0.00544	1.69	-0.16	12.23	-2.88385	LDHB|8.9536;PARK7|5.445	2	12	159	38520	http://www.ebi.ac.uk/QuickGO/GTerm?id=GO:0006089	[]
7	7	regulation of superoxide anion generation	GO:0032928	0.00109	0.00544	2.28	-0.09	12.23	-2.88385	SOD1|16.1436;GSTP1|11.8032	2	12	159	38520	http://www.ebi.ac.uk/QuickGO/GTerm?id=GO:0032928	[]
6	4,5,6	positive regulation of cellular response to oxidative stress	GO:1900409	0.00109	0.00544	1.94	-0.13	12.23	-2.88385	SOD1|16.1436;PARK7|5.445	2	12	159	38520	http://www.ebi.ac.uk/QuickGO/GTerm?id=GO:1900409	[]
10	7,8,9,10	long-chain fatty acid transport	GO:0015909	0.00111	0.0055	0.68	-0.26	12.23	-2.88385	ANXA1|0.2089;FABP1|14.3219;ACE|2.2909	3	49	159	38520	http://www.ebi.ac.uk/QuickGO/GTerm?id=GO:0015909	[]
6	5,6	heterotypic cell-cell adhesion	GO:0034113	0.00111	0.0055	0.14	-0.31	12.23	-2.88385	APOA1|18.8799;MADCAM1|0.7178;FGG|3.0479	3	49	159	38520	http://www.ebi.ac.uk/QuickGO/GTerm?id=GO:0034113	[]
8	8	cellular response to glucocorticoid stimulus	GO:0071385	0.00111	0.0055	0.68	-0.26	12.23	-2.88385	ANXA1|0.2089;ASS1|2.4889;SERPINF1|3.2509	3	49	159	38520	http://www.ebi.ac.uk/QuickGO/GTerm?id=GO:0071385	[]
5	5	response to decreased oxygen levels	GO:0036293	0.00111	0.0055	5.24	0.21	12.23	-2.88385	DPP4|4.7424;VASN|0.1738;CAT|15.417;ACTN4|10.8643;FABP1|14.3219;AHCY|2.6546	6	279	159	38520	http://www.ebi.ac.uk/QuickGO/GTerm?id=GO:0036293	[]
7	6,7	regulation of protein modification process	GO:0031399	0.00111	0.0055	14.87	1.19	12.23	-2.88385	TF|1.2823;C3|1.4997;PSAP|7.656;F2|0.1009;APOA1|18.8799;FBLN1|0.1067;SOD1|16.1436;PRDX1|3.1623;PARK7|5.445;GSTP1|11.8032;DAG1|3.02;FGG|3.0479;TXN|16.4437;SPINK1|0.5012;ELANE|0.4246;ACE|2.2909;ACVR1B|0.1294;FGFR4|6.9823;CDC42|99.0832	19	2100	159	38520	http://www.ebi.ac.uk/QuickGO/GTerm?id=GO:0031399	[]
8	7,8	cellular cation homeostasis	GO:0030003	0.00111	0.00552	-5.34	-0.87	12.23	-2.88385	TF|1.2823;F2|0.1009;CD55|0.2535;HEXB|2.729;SOD1|16.1436;LCN2|0.2051;S100A8|0.2965;S100A9|0.3945;ELANE|0.4246	9	617	159	38520	http://www.ebi.ac.uk/QuickGO/GTerm?id=GO:0030003	[]
4	4	single-organism carbohydrate metabolic process	GO:0044723	0.00114	0.00562	8.82	0.57	12.23	-2.88385	LRP2|0.4365;MGAM|7.379;GAA|14.4544;PGK1|6.0256;ENO1|7.8705;GLB1|2.5119;TPI1|15.2757;GAPDH|6.0256;HEXB|2.729;ALDOA|1.7378;IDH1|2.3335;SORD|1.7219;FUCA1|12.942	13	1164	159	38520	http://www.ebi.ac.uk/QuickGO/GTerm?id=GO:0044723	[]
5	5	response to light stimulus	GO:0009416	0.00115	0.00568	5.38	0.22	12.23	-2.88385	LRP2|0.4365;APOA4|15.2757;APOA1|18.8799;MME|5.2481;CAT|15.417;TTR|1.9055;ELANE|0.4246	7	385	159	38520	http://www.ebi.ac.uk/QuickGO/GTerm?id=GO:0009416	[]
6	4,6	inflammatory response to antigenic stimulus	GO:0002437	0.00117	0.00578	0.37	-0.29	12.23	-2.88385	C3|1.4997;AHCY|2.6546;ELANE|0.4246	3	50	159	38520	http://www.ebi.ac.uk/QuickGO/GTerm?id=GO:0002437	[]
5	4,5	prostate gland development	GO:0030850	0.00117	0.00578	0.68	-0.26	12.23	-2.88385	PSAP|7.656;ANXA1|0.2089;SERPINF1|3.2509	3	50	159	38520	http://www.ebi.ac.uk/QuickGO/GTerm?id=GO:0030850	[]
5	5	epithelium development	GO:0060429	0.00121	0.00594	12.28	0.93	12.23	-2.88385	PSAP|7.656;ANXA1|0.2089;PGK1|6.0256;ANXA4|3.342;HEG1|0.0839;CAT|15.417;SOD1|16.1436;GSTA2|18.5353;MADCAM1|0.7178;CST6|0.0692;DAG1|3.02;ACVR1B|0.1294;CDC42|99.0832	13	1172	159	38520	http://www.ebi.ac.uk/QuickGO/GTerm?id=GO:0060429	[]
6	4,5,6	positive regulation of endocytosis	GO:0045807	0.00123	0.00603	1.7	-0.15	12.23	-2.88385	C3|1.4997;C4A|0.673;ACTN4|10.8643;CD63|2.0893	4	112	159	38520	http://www.ebi.ac.uk/QuickGO/GTerm?id=GO:0045807	[]
6	5,6	development of primary female sexual characteristics	GO:0046545	0.00123	0.00603	4.4	0.12	12.23	-2.88385	SOD1|16.1436;IDH1|2.3335;ACVR1B|0.1294;PLEKHA1|85.5067	4	112	159	38520	http://www.ebi.ac.uk/QuickGO/GTerm?id=GO:0046545	[]
7	5,7	immune response-activating cell surface receptor signaling pathway	GO:0002429	0.00123	0.00604	9.04	0.6	12.23	-2.88385	IGHG2|17.378;IGHG1|1.3062;P06314|0.1076;HSP90AA1|11.5878;IGHG3|3.281;P01594|0.0614;PLEKHA1|85.5067;CDC42|99.0832	8	504	159	38520	http://www.ebi.ac.uk/QuickGO/GTerm?id=GO:0002429	[]
8	8	hyaluronan metabolic process	GO:0030212	0.00124	0.00606	0.14	-0.31	12.23	-2.88385	HEXB|2.729;ITIH1|6.9183;GUSB|0.7311	3	51	159	38520	http://www.ebi.ac.uk/QuickGO/GTerm?id=GO:0030212	[]
6	5,6	regulation of nitric oxide biosynthetic process	GO:0045428	0.00124	0.00606	1.69	-0.16	12.23	-2.88385	HBB|1.6904;ASS1|2.4889;HSP90AA1|11.5878	3	51	159	38520	http://www.ebi.ac.uk/QuickGO/GTerm?id=GO:0045428	[]
7	7	cellular response to corticosteroid stimulus	GO:0071384	0.00124	0.00606	0.68	-0.26	12.23	-2.88385	ANXA1|0.2089;ASS1|2.4889;SERPINF1|3.2509	3	51	159	38520	http://www.ebi.ac.uk/QuickGO/GTerm?id=GO:0071384	[]
6	6	regulation of lipase activity	GO:0060191	0.00127	0.00614	4.22	0.1	12.23	-2.88385	APOA4|15.2757;ANXA1|0.2089;APOA1|18.8799;APOH|11.9124	4	113	159	38520	http://www.ebi.ac.uk/QuickGO/GTerm?id=GO:0060191	[]
6	5,6	phototransduction	GO:0007602	0.00127	0.00614	3.1	-0.01	12.23	-2.88385	LRP2|0.4365;APOA4|15.2757;APOA1|18.8799;TTR|1.9055	4	113	159	38520	http://www.ebi.ac.uk/QuickGO/GTerm?id=GO:0007602	[]
7	4,6,7	killing of cells in other organism involved in symbiotic interaction	GO:0051883	0.00128	0.00614	0.28	-0.3	12.23	-2.88385	ALB|1.2246;ELANE|0.4246	2	13	159	38520	http://www.ebi.ac.uk/QuickGO/GTerm?id=GO:0051883	[]
10	3,4,7,8,9,10	regulation of fibrinolysis	GO:0051917	0.00128	0.00614	-0.08	-0.34	12.23	-2.88385	F2|0.1009;APOH|11.9124	2	13	159	38520	http://www.ebi.ac.uk/QuickGO/GTerm?id=GO:0051917	[]
3	3	response to inactivity	GO:0014854	0.00128	0.00614	-0.19	-0.35	12.23	-2.88385	F2|0.1009;CAT|15.417	2	13	159	38520	http://www.ebi.ac.uk/QuickGO/GTerm?id=GO:0014854	[]
4	4	estrous cycle	GO:0044849	0.00128	0.00614	-1.89	-0.52	12.23	-2.88385	ANXA1|0.2089;MMP7|0.0619	2	13	159	38520	http://www.ebi.ac.uk/QuickGO/GTerm?id=GO:0044849	[]
9	6,7,9	very-low-density lipoprotein particle remodeling	GO:0034372	0.00128	0.00614	2.46	-0.08	12.23	-2.88385	APOA4|15.2757;APOA1|18.8799	2	13	159	38520	http://www.ebi.ac.uk/QuickGO/GTerm?id=GO:0034372	[]
8	5,6,8	triglyceride-rich lipoprotein particle remodeling	GO:0034370	0.00128	0.00614	2.46	-0.08	12.23	-2.88385	APOA4|15.2757;APOA1|18.8799	2	13	159	38520	http://www.ebi.ac.uk/QuickGO/GTerm?id=GO:0034370	[]
8	4,5,6,7,8	positive regulation of bone resorption	GO:0045780	0.00128	0.00614	0.74	-0.25	12.23	-2.88385	TF|1.2823;SPP1|0.1406	2	13	159	38520	http://www.ebi.ac.uk/QuickGO/GTerm?id=GO:0045780	[]
6	5,6	disruption of cells of other organism involved in symbiotic interaction	GO:0051818	0.00128	0.00614	0.28	-0.3	12.23	-2.88385	ALB|1.2246;ELANE|0.4246	2	13	159	38520	http://www.ebi.ac.uk/QuickGO/GTerm?id=GO:0051818	[]
7	5,6,7	positive regulation of bone remodeling	GO:0046852	0.00128	0.00614	0.74	-0.25	12.23	-2.88385	TF|1.2823;SPP1|0.1406	2	13	159	38520	http://www.ebi.ac.uk/QuickGO/GTerm?id=GO:0046852	[]
3	3	response to redox state	GO:0051775	0.00128	0.00614	-0.74	-0.4	12.23	-2.88385	VASN|0.1738;ARHGDIA|31.3329	2	13	159	38520	http://www.ebi.ac.uk/QuickGO/GTerm?id=GO:0051775	[]
6	6	glycerolipid catabolic process	GO:0046503	0.00131	0.00629	3.62	0.04	12.23	-2.88385	APOA4|15.2757;APOA1|18.8799;FABP1|14.3219	3	52	159	38520	http://www.ebi.ac.uk/QuickGO/GTerm?id=GO:0046503	[]
7	5,6,7	regulation of cytokine-mediated signaling pathway	GO:0001959	0.00135	0.00647	3.89	0.07	12.23	-2.88385	APOA1|18.8799;HSPA1B|4.3652;GSTP1|11.8032;ECM1|7.9433	4	115	159	38520	http://www.ebi.ac.uk/QuickGO/GTerm?id=GO:0001959	[]
5	5	neuron death	GO:0070997	0.0014	0.00666	7.18	0.41	12.23	-2.88385	GAPDH|6.0256;SOD1|16.1436;SERPINF1|3.2509;PARK7|5.445;CDC42|99.0832;KLK6|0.0113	6	292	159	38520	http://www.ebi.ac.uk/QuickGO/GTerm?id=GO:0070997	[]
4	4	leukocyte proliferation	GO:0070661	0.0014	0.00666	-0.72	-0.4	12.23	-2.88385	CD55|0.2535;IGFBP2|0.2754;GSTP1|11.8032;PNP|7.7983;SCGB1A1|0.3532;ACE|2.2909	6	292	159	38520	http://www.ebi.ac.uk/QuickGO/GTerm?id=GO:0070661	[]
3	3	negative regulation of developmental process	GO:0051093	0.00142	0.00676	4.62	0.15	12.23	-2.88385	EFEMP1|0.0904;SPP1|0.1406;VASN|0.1738;F2|0.1009;KLK3|4.4875;FBLN1|0.1067;APOH|11.9124;SERPINF1|3.2509;ACTN4|10.8643;ARHGDIA|31.3329;ECM1|7.9433	11	906	159	38520	http://www.ebi.ac.uk/QuickGO/GTerm?id=GO:0051093	[]
4	3,4	negative regulation of signaling	GO:0023057	0.00142	0.00676	12.83	0.99	12.23	-2.88385	FBN1|0.207;VASN|0.1738;APOA1|18.8799;OLFM4|0.2512;FBLN1|0.1067;HSPA1B|4.3652;PARK7|5.445;GSTP1|11.8032;DAG1|3.02;FGG|3.0479;SPINK1|0.5012;PLEKHA1|85.5067;CDC42|99.0832;ECM1|7.9433	14	1344	159	38520	http://www.ebi.ac.uk/QuickGO/GTerm?id=GO:0023057	[]
8	5,6,7,8	negative regulation of protein secretion	GO:0050709	0.00144	0.00685	-0.15	-0.34	12.23	-2.88385	ANXA1|0.2089;APOA1|18.8799;ANXA4|3.342;FBLN1|0.1067	4	117	159	38520	http://www.ebi.ac.uk/QuickGO/GTerm?id=GO:0050709	[]
3	3	immune system development	GO:0002520	0.00144	0.00685	7.63	0.45	12.23	-2.88385	TF|1.2823;C3|1.4997;ANXA1|0.2089;CD248|0.5297;SOD1|16.1436;PRG4|0.2831;GLO1|3.1333;PNP|7.7983;ACE|2.2909;ACVR1B|0.1294;CDC42|99.0832	11	908	159	38520	http://www.ebi.ac.uk/QuickGO/GTerm?id=GO:0002520	[]
8	8	cholesterol biosynthetic process	GO:0006695	0.00147	0.00694	3.67	0.05	12.23	-2.88385	APOA4|15.2757;APOA1|18.8799;SOD1|16.1436	3	54	159	38520	http://www.ebi.ac.uk/QuickGO/GTerm?id=GO:0006695	[]
4	4	generation of precursor metabolites and energy	GO:0006091	0.00148	0.00697	7.33	0.42	12.23	-2.88385	GAA|14.4544;PGK1|6.0256;ENO1|7.8705;TPI1|15.2757;GAPDH|6.0256;CAT|15.417;ALDOA|1.7378;IDH1|2.3335;PARK7|5.445	9	643	159	38520	http://www.ebi.ac.uk/QuickGO/GTerm?id=GO:0006091	[]
5	5	protein stabilization	GO:0050821	0.00149	0.00697	3.43	0.02	12.23	-2.88385	APOA1|18.8799;GAPDH|6.0256;HSPA1B|4.3652;PARK7|5.445	4	118	159	38520	http://www.ebi.ac.uk/QuickGO/GTerm?id=GO:0050821	[]
6	6	steroid esterification	GO:0034433	0.00149	0.00697	2.46	-0.08	12.23	-2.88385	APOA4|15.2757;APOA1|18.8799	2	14	159	38520	http://www.ebi.ac.uk/QuickGO/GTerm?id=GO:0034433	[]
8	8	cholesterol esterification	GO:0034435	0.00149	0.00697	2.46	-0.08	12.23	-2.88385	APOA4|15.2757;APOA1|18.8799	2	14	159	38520	http://www.ebi.ac.uk/QuickGO/GTerm?id=GO:0034435	[]
8	6,7,8	regulation of proton transport	GO:0010155	0.00149	0.00697	1.77	-0.15	12.23	-2.88385	ACTN4|10.8643;PARK7|5.445	2	14	159	38520	http://www.ebi.ac.uk/QuickGO/GTerm?id=GO:0010155	[]
5	5	regulation of metalloenzyme activity	GO:0048552	0.00149	0.00697	2.84	-0.04	12.23	-2.88385	FGFR4|6.9823;CDC42|99.0832	2	14	159	38520	http://www.ebi.ac.uk/QuickGO/GTerm?id=GO:0048552	[]
7	5,7	acute inflammatory response to antigenic stimulus	GO:0002438	0.00149	0.00697	0.2	-0.31	12.23	-2.88385	C3|1.4997;ELANE|0.4246	2	14	159	38520	http://www.ebi.ac.uk/QuickGO/GTerm?id=GO:0002438	[]
7	6,7	negative regulation of interleukin-1 beta production	GO:0032691	0.00149	0.00697	2.35	-0.09	12.23	-2.88385	APOA1|18.8799;GSTP1|11.8032	2	14	159	38520	http://www.ebi.ac.uk/QuickGO/GTerm?id=GO:0032691	[]
7	7	sterol esterification	GO:0034434	0.00149	0.00697	2.46	-0.08	12.23	-2.88385	APOA4|15.2757;APOA1|18.8799	2	14	159	38520	http://www.ebi.ac.uk/QuickGO/GTerm?id=GO:0034434	[]
5	4,5	negative regulation of cell communication	GO:0010648	0.0015	0.00701	12.83	0.99	12.23	-2.88385	FBN1|0.207;VASN|0.1738;APOA1|18.8799;OLFM4|0.2512;FBLN1|0.1067;HSPA1B|4.3652;PARK7|5.445;GSTP1|11.8032;DAG1|3.02;FGG|3.0479;SPINK1|0.5012;PLEKHA1|85.5067;CDC42|99.0832;ECM1|7.9433	14	1352	159	38520	http://www.ebi.ac.uk/QuickGO/GTerm?id=GO:0010648	[]
4	4	cell projection organization	GO:0030030	0.00151	0.00703	16.18	1.33	12.23	-2.88385	APOA4|15.2757;SPP1|0.1406;CDH1|0.7311;APOA1|18.8799;HSPA8|4.3251;SOD1|16.1436;PVRL2|0.0887;SERPINF1|3.2509;EPHB4|0.6081;HSP90AA1|11.5878;DAG1|3.02;ARHGDIA|31.3329;MYLK|0.6427;PLEKHA1|85.5067;CDC42|99.0832;KLK6|0.0113	16	1665	159	38520	http://www.ebi.ac.uk/QuickGO/GTerm?id=GO:0030030	[]
6	6	cellular response to metal ion	GO:0071248	0.00154	0.00714	2.07	-0.12	12.23	-2.88385	CDH1|0.7311;SOD1|16.1436;SERPINF1|3.2509;CPNE3|1.6293	4	119	159	38520	http://www.ebi.ac.uk/QuickGO/GTerm?id=GO:0071248	[]
5	5	positive regulation of lipid biosynthetic process	GO:0046889	0.00155	0.00717	0.68	-0.26	12.23	-2.88385	APOA4|15.2757;ANXA1|0.2089;APOA1|18.8799	3	55	159	38520	http://www.ebi.ac.uk/QuickGO/GTerm?id=GO:0046889	[]
9	7,8,9	bicarbonate transport	GO:0015701	0.00155	0.00717	1.86	-0.14	12.23	-2.88385	HBB|1.6904;CA1|26.3027;HBA1|1.6144	3	55	159	38520	http://www.ebi.ac.uk/QuickGO/GTerm?id=GO:0015701	[]
5	5	neuron projection regeneration	GO:0031102	0.00155	0.00717	0.85	-0.24	12.23	-2.88385	APOA4|15.2757;SPP1|0.1406;APOA1|18.8799	3	55	159	38520	http://www.ebi.ac.uk/QuickGO/GTerm?id=GO:0031102	[]
6	6	collagen metabolic process	GO:0032963	0.00158	0.00733	-4.52	-0.79	12.23	-2.88385	F2|0.1009;ELANE|0.4246;MMP7|0.0619;KLK6|0.0113	4	120	159	38520	http://www.ebi.ac.uk/QuickGO/GTerm?id=GO:0032963	[]
4	4	response to oxygen levels	GO:0070482	0.0016	0.0074	5.24	0.21	12.23	-2.88385	DPP4|4.7424;VASN|0.1738;CAT|15.417;ACTN4|10.8643;FABP1|14.3219;AHCY|2.6546	6	300	159	38520	http://www.ebi.ac.uk/QuickGO/GTerm?id=GO:0070482	[]
7	7	nucleoside diphosphate phosphorylation	GO:0006165	0.00163	0.00749	3.88	0.07	12.23	-2.88385	PGK1|6.0256;ENO1|7.8705;TPI1|15.2757;GAPDH|6.0256;ALDOA|1.7378	5	204	159	38520	http://www.ebi.ac.uk/QuickGO/GTerm?id=GO:0006165	[]
6	5,6	positive regulation of cellular protein metabolic process	GO:0032270	0.00163	0.00749	12.17	0.92	12.23	-2.88385	TF|1.2823;C3|1.4997;PSAP|7.656;F2|0.1009;FBLN1|0.1067;SOD1|16.1436;S100A8|0.2965;S100A9|0.3945;PARK7|5.445;FGG|3.0479;TXN|16.4437;ELANE|0.4246;ACE|2.2909;ACVR1B|0.1294;FGFR4|6.9823;CDC42|99.0832	16	1678	159	38520	http://www.ebi.ac.uk/QuickGO/GTerm?id=GO:0032270	[]
2	2	cell killing	GO:0001906	0.00163	0.00749	0.84	-0.24	12.23	-2.88385	ALB|1.2246;PVRL2|0.0887;PRDX1|3.1623;ELANE|0.4246	4	121	159	38520	http://www.ebi.ac.uk/QuickGO/GTerm?id=GO:0001906	[]
6	6	response to ethanol	GO:0045471	0.00163	0.00749	-1.46	-0.48	12.23	-2.88385	CAT|15.417;SOD1|16.1436;S100A8|0.2965;S100A9|0.3945	4	121	159	38520	http://www.ebi.ac.uk/QuickGO/GTerm?id=GO:0045471	[]
4	4	regulation of response to cytokine stimulus	GO:0060759	0.00163	0.00749	3.89	0.07	12.23	-2.88385	APOA1|18.8799;HSPA1B|4.3652;GSTP1|11.8032;ECM1|7.9433	4	121	159	38520	http://www.ebi.ac.uk/QuickGO/GTerm?id=GO:0060759	[]
4	4	positive regulation of molecular function	GO:0044093	0.00163	0.00749	20.02	1.72	12.23	-2.88385	TF|1.2823;PSAP|7.656;APOA4|15.2757;APOA1|18.8799;FBLN1|0.1067;CAT|15.417;SOD1|16.1436;APOH|11.9124;HSPA1B|4.3652;S100A8|0.2965;ACTN4|10.8643;SH3BGRL3|0.0461;S100A9|0.3945;PARK7|5.445;FABP1|14.3219;TXN|16.4437;ELANE|0.4246;ACE|2.2909;ARHGDIA|31.3329;FGFR4|6.9823;CDC42|99.0832	21	2514	159	38520	http://www.ebi.ac.uk/QuickGO/GTerm?id=GO:0044093	[]
7	5,6,7	regulation of lymphocyte activation	GO:0051249	0.00164	0.00752	1.61	-0.16	12.23	-2.88385	DPP4|4.7424;CD55|0.2535;IGFBP2|0.2754;SOD1|16.1436;PNP|7.7983;SCGB1A1|0.3532;CDC42|99.0832	7	410	159	38520	http://www.ebi.ac.uk/QuickGO/GTerm?id=GO:0051249	[]
7	5,6,7	regulation of apoptotic signaling pathway	GO:2001233	0.00167	0.00762	5.07	0.19	12.23	-2.88385	SOD1|16.1436;HSPA1B|4.3652;S100A8|0.2965;S100A9|0.3945;PARK7|5.445;GSTP1|11.8032;FGG|3.0479	7	411	159	38520	http://www.ebi.ac.uk/QuickGO/GTerm?id=GO:2001233	[]
5	5	cellular response to organic substance	GO:0071310	0.00169	0.00772	16.94	1.41	12.23	-2.88385	FBN1|0.207;PSAP|7.656;KRT13|0.278;VASN|0.1738;CDH1|0.7311;ANXA1|0.2089;APOA1|18.8799;MME|5.2481;GAPDH|6.0256;CD55|0.2535;IGFBP2|0.2754;CAT|15.417;SOD1|16.1436;ASS1|2.4889;SERPINF1|3.2509;HSPA1B|4.3652;PARK7|5.445;GSTP1|11.8032;CD63|2.0893;ARHGDIA|31.3329;FGFR4|6.9823;ECM1|7.9433	22	2696	159	38520	http://www.ebi.ac.uk/QuickGO/GTerm?id=GO:0071310	[]
7	5,6,7	neuron projection development	GO:0031175	0.0017	0.00773	11.79	0.88	12.23	-2.88385	APOA4|15.2757;SPP1|0.1406;CDH1|0.7311;APOA1|18.8799;HSPA8|4.3251;SERPINF1|3.2509;EPHB4|0.6081;HSP90AA1|11.5878;DAG1|3.02;ARHGDIA|31.3329;CDC42|99.0832;KLK6|0.0113	12	1070	159	38520	http://www.ebi.ac.uk/QuickGO/GTerm?id=GO:0031175	[]
7	7	protein carboxylation	GO:0018214	0.00172	0.00775	-0.12	-0.34	12.23	-2.88385	F2|0.1009;PROZ|13.0617	2	15	159	38520	http://www.ebi.ac.uk/QuickGO/GTerm?id=GO:0018214	[]
8	5,6,8	high-density lipoprotein particle remodeling	GO:0034375	0.00172	0.00775	2.46	-0.08	12.23	-2.88385	APOA4|15.2757;APOA1|18.8799	2	15	159	38520	http://www.ebi.ac.uk/QuickGO/GTerm?id=GO:0034375	[]
9	6,7,8,9	negative regulation of tumor necrosis factor-mediated signaling pathway	GO:0010804	0.00172	0.00775	2.35	-0.09	12.23	-2.88385	APOA1|18.8799;GSTP1|11.8032	2	15	159	38520	http://www.ebi.ac.uk/QuickGO/GTerm?id=GO:0010804	[]
8	8	peptidyl-glutamic acid carboxylation	GO:0017187	0.00172	0.00775	-0.12	-0.34	12.23	-2.88385	F2|0.1009;PROZ|13.0617	2	15	159	38520	http://www.ebi.ac.uk/QuickGO/GTerm?id=GO:0017187	[]
6	5,6	negative regulation of chemokine production	GO:0032682	0.00172	0.00775	-0.7	-0.4	12.23	-2.88385	GSTP1|11.8032;ELANE|0.4246	2	15	159	38520	http://www.ebi.ac.uk/QuickGO/GTerm?id=GO:0032682	[]
6	6	intestinal cholesterol absorption	GO:0030299	0.00172	0.00775	2.46	-0.08	12.23	-2.88385	APOA4|15.2757;APOA1|18.8799	2	15	159	38520	http://www.ebi.ac.uk/QuickGO/GTerm?id=GO:0030299	[]
7	6,7	negative regulation of lipase activity	GO:0060192	0.00172	0.00775	-0.6	-0.39	12.23	-2.88385	ANXA1|0.2089;APOA1|18.8799	2	15	159	38520	http://www.ebi.ac.uk/QuickGO/GTerm?id=GO:0060192	[]
7	6,7	enzyme linked receptor protein signaling pathway	GO:0007167	0.00177	0.00797	4.27	0.11	12.23	-2.88385	TF|1.2823;PIGR|0.7586;FBN1|0.207;EFEMP1|0.0904;VASN|0.1738;APOA1|18.8799;IGFBP2|0.2754;EPHB4|0.6081;HSP90AA1|11.5878;CD63|2.0893;ACVR1B|0.1294;ARHGDIA|31.3329;FGFR4|6.9823;PLEKHA1|85.5067;CDC42|99.0832	15	1532	159	38520	http://www.ebi.ac.uk/QuickGO/GTerm?id=GO:0007167	[]
6	4,6	regulation of cell shape	GO:0008360	0.00181	0.00815	3.65	0.05	12.23	-2.88385	F2|0.1009;HEXB|2.729;ALDOA|1.7378;DAG1|3.02;ARHGDIA|31.3329	5	209	159	38520	http://www.ebi.ac.uk/QuickGO/GTerm?id=GO:0008360	[]
4	4	negative regulation of cell motility	GO:2000146	0.00181	0.00815	4.54	0.14	12.23	-2.88385	FBLN1|0.1067;APOH|11.9124;SERPINF1|3.2509;DAG1|3.02;ARHGDIA|31.3329	5	209	159	38520	http://www.ebi.ac.uk/QuickGO/GTerm?id=GO:2000146	[]
6	6	neurogenesis	GO:0022008	0.00183	0.00822	16.04	1.31	12.23	-2.88385	APOA4|15.2757;SPP1|0.1406;F2|0.1009;CDH1|0.7311;ANXA1|0.2089;APOA1|18.8799;NAGLU|8.3946;HSPA8|4.3251;HEXB|2.729;SOD1|16.1436;SERPINF1|3.2509;EPHB4|0.6081;HSP90AA1|11.5878;DAG1|3.02;ARHGDIA|31.3329;CDC42|99.0832;KLK6|0.0113	17	1860	159	38520	http://www.ebi.ac.uk/QuickGO/GTerm?id=GO:0022008	[]
5	5	glycerolipid metabolic process	GO:0046486	0.00183	0.00822	7.36	0.42	12.23	-2.88385	C3|1.4997;APOA4|15.2757;APOA1|18.8799;CAT|15.417;APOH|11.9124;FABP1|14.3219;CPNE3|1.6293;BPNT1|12.2462	8	537	159	38520	http://www.ebi.ac.uk/QuickGO/GTerm?id=GO:0046486	[]
6	6	myelination	GO:0042552	0.00184	0.00823	4.07	0.09	12.23	-2.88385	HEXB|2.729;SOD1|16.1436;DAG1|3.02;KLK6|0.0113	4	125	159	38520	http://www.ebi.ac.uk/QuickGO/GTerm?id=GO:0042552	[]
5	5	female sex differentiation	GO:0046660	0.00189	0.00843	4.4	0.12	12.23	-2.88385	SOD1|16.1436;IDH1|2.3335;ACVR1B|0.1294;PLEKHA1|85.5067	4	126	159	38520	http://www.ebi.ac.uk/QuickGO/GTerm?id=GO:0046660	[]
5	5	detection of light stimulus	GO:0009583	0.00189	0.00843	3.1	-0.01	12.23	-2.88385	LRP2|0.4365;APOA4|15.2757;APOA1|18.8799;TTR|1.9055	4	126	159	38520	http://www.ebi.ac.uk/QuickGO/GTerm?id=GO:0009583	[]
7	7	sterol biosynthetic process	GO:0016126	0.00189	0.00843	3.67	0.05	12.23	-2.88385	APOA4|15.2757;APOA1|18.8799;SOD1|16.1436	3	59	159	38520	http://www.ebi.ac.uk/QuickGO/GTerm?id=GO:0016126	[]
6	6	purine nucleobase metabolic process	GO:0006144	0.00189	0.00843	2.82	-0.04	12.23	-2.88385	ACPP|5.4954;CAT|15.417;PNP|7.7983	3	59	159	38520	http://www.ebi.ac.uk/QuickGO/GTerm?id=GO:0006144	[]
6	5,6	positive regulation of cellular biosynthetic process	GO:0031328	0.0019	0.00847	13.1	1.01	12.23	-2.88385	TF|1.2823;APOA4|15.2757;CDH1|0.7311;ANXA1|0.2089;APOA1|18.8799;HBB|1.6904;HEXB|2.729;CAT|15.417;ASS1|2.4889;HSPA1B|4.3652;S100A8|0.2965;S100A9|0.3945;PARK7|5.445;HSP90AA1|11.5878;ELANE|0.4246;ACVR1B|0.1294;FGFR4|6.9823;CDC42|99.0832	18	2033	159	38520	http://www.ebi.ac.uk/QuickGO/GTerm?id=GO:0031328	[]
5	5	lipid biosynthetic process	GO:0008610	0.00192	0.00851	7.1	0.4	12.23	-2.88385	C3|1.4997;APOA4|15.2757;GGT1|5.2;ANXA1|0.2089;APOA1|18.8799;HEXB|2.729;SOD1|16.1436;IDH1|2.3335;CPNE3|1.6293;FGFR4|6.9823	10	802	159	38520	http://www.ebi.ac.uk/QuickGO/GTerm?id=GO:0008610	[]
4	4	positive regulation of leukocyte activation	GO:0002696	0.00192	0.00851	-1.36	-0.47	12.23	-2.88385	DPP4|4.7424;CD55|0.2535;IGFBP2|0.2754;PVRL2|0.0887;PNP|7.7983;CDC42|99.0832	6	311	159	38520	http://www.ebi.ac.uk/QuickGO/GTerm?id=GO:0002696	[]
5	5	hyaluronan catabolic process	GO:0030214	0.00196	0.0086	-0.3	-0.36	12.23	-2.88385	HEXB|2.729;GUSB|0.7311	2	16	159	38520	http://www.ebi.ac.uk/QuickGO/GTerm?id=GO:0030214	[]
8	7,8	purine nucleoside catabolic process	GO:0006152	0.00196	0.0086	1.32	-0.19	12.23	-2.88385	AHCY|2.6546;PNP|7.7983	2	16	159	38520	http://www.ebi.ac.uk/QuickGO/GTerm?id=GO:0006152	[]
9	8,9	purine ribonucleoside catabolic process	GO:0046130	0.00196	0.0086	1.32	-0.19	12.23	-2.88385	AHCY|2.6546;PNP|7.7983	2	16	159	38520	http://www.ebi.ac.uk/QuickGO/GTerm?id=GO:0046130	[]
5	4,5	post-embryonic morphogenesis	GO:0009886	0.00196	0.0086	-1.73	-0.5	12.23	-2.88385	FBN1|0.207;EFEMP1|0.0904	2	16	159	38520	http://www.ebi.ac.uk/QuickGO/GTerm?id=GO:0009886	[]
6	6	basement membrane organization	GO:0071711	0.00196	0.0086	-0.09	-0.34	12.23	-2.88385	NID1|0.4093;DAG1|3.02	2	16	159	38520	http://www.ebi.ac.uk/QuickGO/GTerm?id=GO:0071711	[]
4	4	symbiosis, encompassing mutualism through parasitism	GO:0044403	0.00196	0.0086	7.47	0.44	12.23	-2.88385	ALB|1.2246;ANPEP|12.0226;DPP4|4.7424;HSPA8|4.3251;CD55|0.2535;FBLN1|0.1067;PPIA|7.5858;PVRL2|0.0887;HSPA1B|4.3652;DAG1|3.02;ELANE|0.4246	11	944	159	38520	http://www.ebi.ac.uk/QuickGO/GTerm?id=GO:0044403	[]
3	3	interspecies interaction between organisms	GO:0044419	0.00196	0.0086	7.47	0.44	12.23	-2.88385	ALB|1.2246;ANPEP|12.0226;DPP4|4.7424;HSPA8|4.3251;CD55|0.2535;FBLN1|0.1067;PPIA|7.5858;PVRL2|0.0887;HSPA1B|4.3652;DAG1|3.02;ELANE|0.4246	11	944	159	38520	http://www.ebi.ac.uk/QuickGO/GTerm?id=GO:0044419	[]
5	5	regulation of leukocyte proliferation	GO:0070663	0.00197	0.00864	-1.96	-0.53	12.23	-2.88385	CD55|0.2535;IGFBP2|0.2754;GSTP1|11.8032;PNP|7.7983;SCGB1A1|0.3532	5	213	159	38520	http://www.ebi.ac.uk/QuickGO/GTerm?id=GO:0070663	[]
8	6,7,8	regulation of protein kinase B signaling	GO:0051896	0.002	0.00876	4.36	0.12	12.23	-2.88385	PARK7|5.445;DAG1|3.02;TXN|16.4437;PLEKHA1|85.5067	4	128	159	38520	http://www.ebi.ac.uk/QuickGO/GTerm?id=GO:0051896	[]
4	4	ensheathment of neurons	GO:0007272	0.002	0.00876	4.07	0.09	12.23	-2.88385	HEXB|2.729;SOD1|16.1436;DAG1|3.02;KLK6|0.0113	4	128	159	38520	http://www.ebi.ac.uk/QuickGO/GTerm?id=GO:0007272	[]
5	5	axon ensheathment	GO:0008366	0.002	0.00876	4.07	0.09	12.23	-2.88385	HEXB|2.729;SOD1|16.1436;DAG1|3.02;KLK6|0.0113	4	128	159	38520	http://www.ebi.ac.uk/QuickGO/GTerm?id=GO:0008366	[]
5	5	alpha-amino acid metabolic process	GO:1901605	0.00201	0.00879	4.63	0.15	12.23	-2.88385	GGT1|5.2;BHMT|13.5519;ASS1|2.4889;PARK7|5.445;AHCY|2.6546;CKB|3.0761;FAH|5.445	7	425	159	38520	http://www.ebi.ac.uk/QuickGO/GTerm?id=GO:1901605	[]
6	4,6	immune response-activating signal transduction	GO:0002757	0.00203	0.00887	9.68	0.66	12.23	-2.88385	IGHG2|17.378;IGHG1|1.3062;HSPA1B|4.3652;P06314|0.1076;HSP90AA1|11.5878;IGHG3|3.281;P01594|0.0614;PLEKHA1|85.5067;CDC42|99.0832	9	674	159	38520	http://www.ebi.ac.uk/QuickGO/GTerm?id=GO:0002757	[]
9	6,7,8,9	positive regulation of T cell activation	GO:0050870	0.00209	0.00911	1.16	-0.21	12.23	-2.88385	DPP4|4.7424;CD55|0.2535;IGFBP2|0.2754;PNP|7.7983;CDC42|99.0832	5	216	159	38520	http://www.ebi.ac.uk/QuickGO/GTerm?id=GO:0050870	[]
4	4	regulation of response to biotic stimulus	GO:0002831	0.00213	0.00928	-1.72	-0.5	12.23	-2.88385	CD55|0.2535;PVRL2|0.0887;ANXA5|3.6308;FABP1|14.3219;MYLK|0.6427	5	217	159	38520	http://www.ebi.ac.uk/QuickGO/GTerm?id=GO:0002831	[]
6	5,6	viral life cycle	GO:0019058	0.00215	0.00933	5.4	0.23	12.23	-2.88385	ANPEP|12.0226;DPP4|4.7424;CD55|0.2535;PPIA|7.5858;PVRL2|0.0887;HSPA1B|4.3652;DAG1|3.02	7	430	159	38520	http://www.ebi.ac.uk/QuickGO/GTerm?id=GO:0019058	[]
6	5,6	regulation of angiogenesis	GO:0045765	0.00218	0.00944	3.32	0.01	12.23	-2.88385	C3|1.4997;KLK3|4.4875;APOH|11.9124;SERPINF1|3.2509;ECM1|7.9433	5	218	159	38520	http://www.ebi.ac.uk/QuickGO/GTerm?id=GO:0045765	[]
6	6	purine-containing compound catabolic process	GO:0072523	0.00218	0.00946	2.5	-0.07	12.23	-2.88385	CAT|15.417;AHCY|2.6546;PNP|7.7983	3	62	159	38520	http://www.ebi.ac.uk/QuickGO/GTerm?id=GO:0072523	[]
5	5	phospholipid metabolic process	GO:0006644	0.0022	0.00951	7.4	0.43	12.23	-2.88385	APOA4|15.2757;APOA1|18.8799;HEXB|2.729;IDH1|2.3335;PRDX6|6.9183;CPNE3|1.6293;BPNT1|12.2462;CDC42|99.0832	8	553	159	38520	http://www.ebi.ac.uk/QuickGO/GTerm?id=GO:0006644	[]
6	5,6	negative regulation of interleukin-1 production	GO:0032692	0.00221	0.00952	2.35	-0.09	12.23	-2.88385	APOA1|18.8799;GSTP1|11.8032	2	17	159	38520	http://www.ebi.ac.uk/QuickGO/GTerm?id=GO:0032692	[]
5	5	response to hydroperoxide	GO:0033194	0.00221	0.00952	2.36	-0.09	12.23	-2.88385	APOA4|15.2757;GPX3|15.1356	2	17	159	38520	http://www.ebi.ac.uk/QuickGO/GTerm?id=GO:0033194	[]
7	6,7	regulation of interleukin-8 secretion	GO:2000482	0.00221	0.00952	0.16	-0.31	12.23	-2.88385	ANXA1|0.2089;ANXA4|3.342	2	17	159	38520	http://www.ebi.ac.uk/QuickGO/GTerm?id=GO:2000482	[]
6	4,5,6	positive regulation of cell activation	GO:0050867	0.00221	0.00952	-1.36	-0.47	12.23	-2.88385	DPP4|4.7424;CD55|0.2535;IGFBP2|0.2754;PVRL2|0.0887;PNP|7.7983;CDC42|99.0832	6	320	159	38520	http://www.ebi.ac.uk/QuickGO/GTerm?id=GO:0050867	[]
6	6	epidermis development	GO:0008544	0.00225	0.00966	-6.08	-0.95	12.23	-2.88385	ANXA1|0.2089;SOD1|16.1436;MADCAM1|0.7178;CST6|0.0692;ACVR1B|0.1294;CDC42|99.0832	6	321	159	38520	http://www.ebi.ac.uk/QuickGO/GTerm?id=GO:0008544	[]
7	6,7	positive regulation of homotypic cell-cell adhesion	GO:0034112	0.00227	0.00972	1.16	-0.21	12.23	-2.88385	DPP4|4.7424;CD55|0.2535;IGFBP2|0.2754;PNP|7.7983;CDC42|99.0832	5	220	159	38520	http://www.ebi.ac.uk/QuickGO/GTerm?id=GO:0034112	[]
4	4	negative regulation of immune response	GO:0050777	0.0023	0.00988	-0.96	-0.43	12.23	-2.88385	A2M|7.5858;APOA1|18.8799;OLFM4|0.2512;CD55|0.2535	4	133	159	38520	http://www.ebi.ac.uk/QuickGO/GTerm?id=GO:0050777	[]
7	6,7	positive regulation of leukocyte cell-cell adhesion	GO:1903039	0.00231	0.00989	1.16	-0.21	12.23	-2.88385	DPP4|4.7424;CD55|0.2535;IGFBP2|0.2754;PNP|7.7983;CDC42|99.0832	5	221	159	38520	http://www.ebi.ac.uk/QuickGO/GTerm?id=GO:1903039	[]
3	3	response to endogenous stimulus	GO:0009719	0.00243	0.0104	10.81	0.78	12.23	-2.88385	C3|1.4997;FBN1|0.207;SPP1|0.1406;VASN|0.1738;CDH1|0.7311;ANXA1|0.2089;APOA1|18.8799;IGFBP2|0.2754;CAT|15.417;SOD1|16.1436;ASS1|2.4889;IDH1|2.3335;SERPINF1|3.2509;SORD|1.7219;DAG1|3.02;SCGB1A1|0.3532;FGFR4|6.9823	17	1911	159	38520	http://www.ebi.ac.uk/QuickGO/GTerm?id=GO:0009719	[]
3	3	myeloid cell homeostasis	GO:0002262	0.00243	0.0104	-0.14	-0.34	12.23	-2.88385	ANXA1|0.2089;SOD1|16.1436;PRDX1|3.1623;ACVR1B|0.1294	4	135	159	38520	http://www.ebi.ac.uk/QuickGO/GTerm?id=GO:0002262	[]
8	6,7,8	organic anion transport	GO:0015711	0.00247	0.0105	6.6	0.35	12.23	-2.88385	ALB|1.2246;APOA4|15.2757;ANXA1|0.2089;APOA1|18.8799;HBB|1.6904;CA1|26.3027;HBA1|1.6144;FABP1|14.3219;ACE|2.2909	9	694	159	38520	http://www.ebi.ac.uk/QuickGO/GTerm?id=GO:0015711	[]
6	4,6	reproductive structure development	GO:0048608	0.00247	0.0105	6.44	0.33	12.23	-2.88385	PSAP|7.656;SPP1|0.1406;ANXA1|0.2089;SOD1|16.1436;IDH1|2.3335;SERPINF1|3.2509;PLEKHA1|85.5067	7	441	159	38520	http://www.ebi.ac.uk/QuickGO/GTerm?id=GO:0048608	[]
3	3	taxis	GO:0042330	0.00248	0.0105	-3.08	-0.64	12.23	-2.88385	SPP1|0.1406;APOA1|18.8799;HSPA8|4.3251;S100A8|0.2965;S100A9|0.3945;EPHB4|0.6081;HSP90AA1|11.5878;DAG1|3.02;ELANE|0.4246;CDC42|99.0832	10	831	159	38520	http://www.ebi.ac.uk/QuickGO/GTerm?id=GO:0042330	[]
4	4	chemotaxis	GO:0006935	0.00248	0.0105	-3.08	-0.64	12.23	-2.88385	SPP1|0.1406;APOA1|18.8799;HSPA8|4.3251;S100A8|0.2965;S100A9|0.3945;EPHB4|0.6081;HSP90AA1|11.5878;DAG1|3.02;ELANE|0.4246;CDC42|99.0832	10	831	159	38520	http://www.ebi.ac.uk/QuickGO/GTerm?id=GO:0006935	[]
8	7,8	arachidonate transport	GO:1903963	0.00248	0.0105	0.32	-0.3	12.23	-2.88385	ANXA1|0.2089;ACE|2.2909	2	18	159	38520	http://www.ebi.ac.uk/QuickGO/GTerm?id=GO:1903963	[]
9	8,9	arachidonic acid secretion	GO:0050482	0.00248	0.0105	0.32	-0.3	12.23	-2.88385	ANXA1|0.2089;ACE|2.2909	2	18	159	38520	http://www.ebi.ac.uk/QuickGO/GTerm?id=GO:0050482	[]
9	7,8,9	regulation of ERK1 and ERK2 cascade	GO:0070372	0.0025	0.0105	3.55	0.04	12.23	-2.88385	C3|1.4997;FBLN1|0.1067;GSTP1|11.8032;FGG|3.0479;FGFR4|6.9823	5	225	159	38520	http://www.ebi.ac.uk/QuickGO/GTerm?id=GO:0070372	[]
5	5	cellular response to inorganic substance	GO:0071241	0.0025	0.0105	2.07	-0.12	12.23	-2.88385	CDH1|0.7311;SOD1|16.1436;SERPINF1|3.2509;CPNE3|1.6293	4	136	159	38520	http://www.ebi.ac.uk/QuickGO/GTerm?id=GO:0071241	[]
8	7,8	tumor necrosis factor-mediated signaling pathway	GO:0033209	0.0025	0.0105	2.99	-0.02	12.23	-2.88385	APOA1|18.8799;HSPA1B|4.3652;GSTP1|11.8032	3	65	159	38520	http://www.ebi.ac.uk/QuickGO/GTerm?id=GO:0033209	[]
7	6,7	regulation of phagocytosis	GO:0050764	0.0025	0.0105	-0.18	-0.35	12.23	-2.88385	C3|1.4997;C4A|0.673;OLFM4|0.2512	3	65	159	38520	http://www.ebi.ac.uk/QuickGO/GTerm?id=GO:0050764	[]
5	5	nitric oxide biosynthetic process	GO:0006809	0.0025	0.0105	1.69	-0.16	12.23	-2.88385	HBB|1.6904;ASS1|2.4889;HSP90AA1|11.5878	3	65	159	38520	http://www.ebi.ac.uk/QuickGO/GTerm?id=GO:0006809	[]
4	4	hematopoietic or lymphoid organ development	GO:0048534	0.00254	0.0107	7.45	0.43	12.23	-2.88385	TF|1.2823;ANXA1|0.2089;CD248|0.5297;SOD1|16.1436;PRG4|0.2831;GLO1|3.1333;PNP|7.7983;ACE|2.2909;ACVR1B|0.1294;CDC42|99.0832	10	834	159	38520	http://www.ebi.ac.uk/QuickGO/GTerm?id=GO:0048534	[]
7	5,6,7	positive regulation of phosphorus metabolic process	GO:0010562	0.00259	0.0109	10.27	0.72	12.23	-2.88385	TF|1.2823;C3|1.4997;PSAP|7.656;F2|0.1009;SOD1|16.1436;PARK7|5.445;FGG|3.0479;TXN|16.4437;ELANE|0.4246;ACE|2.2909;ACVR1B|0.1294;FGFR4|6.9823;CDC42|99.0832	13	1279	159	38520	http://www.ebi.ac.uk/QuickGO/GTerm?id=GO:0010562	[]
6	6	positive regulation of phosphate metabolic process	GO:0045937	0.00259	0.0109	10.27	0.72	12.23	-2.88385	TF|1.2823;C3|1.4997;PSAP|7.656;F2|0.1009;SOD1|16.1436;PARK7|5.445;FGG|3.0479;TXN|16.4437;ELANE|0.4246;ACE|2.2909;ACVR1B|0.1294;FGFR4|6.9823;CDC42|99.0832	13	1279	159	38520	http://www.ebi.ac.uk/QuickGO/GTerm?id=GO:0045937	[]
5	5	reproductive system development	GO:0061458	0.0026	0.0109	6.44	0.33	12.23	-2.88385	PSAP|7.656;SPP1|0.1406;ANXA1|0.2089;SOD1|16.1436;IDH1|2.3335;SERPINF1|3.2509;PLEKHA1|85.5067	7	445	159	38520	http://www.ebi.ac.uk/QuickGO/GTerm?id=GO:0061458	[]
9	8,9	protein homotetramerization	GO:0051289	0.00261	0.0109	2.61	-0.06	12.23	-2.88385	CAT|15.417;ALDOA|1.7378;GPX3|15.1356	3	66	159	38520	http://www.ebi.ac.uk/QuickGO/GTerm?id=GO:0051289	[]
6	5,6	negative regulation of cell-cell adhesion	GO:0022408	0.00263	0.011	-1.08	-0.44	12.23	-2.88385	CDH1|0.7311;APOA1|18.8799;ASS1|2.4889;SCGB1A1|0.3532	4	138	159	38520	http://www.ebi.ac.uk/QuickGO/GTerm?id=GO:0022408	[]
8	6,7,8	positive regulation of mitophagy	GO:1903599	0.00263	0.011	2.64	-0.06	12.23	-2.88385	ANXA5|3.6308;PARK7|5.445;FABP1|14.3219;MYLK|0.6427	4	138	159	38520	http://www.ebi.ac.uk/QuickGO/GTerm?id=GO:1903599	[]
5	5	single fertilization	GO:0007338	0.0027	0.0113	-0.2	-0.35	12.23	-2.88385	SERPINA5|0.2109;HEXB|2.729;PARK7|5.445;SPINK1|0.5012	4	139	159	38520	http://www.ebi.ac.uk/QuickGO/GTerm?id=GO:0007338	[]
4	4	regulation of primary metabolic process	GO:0080090	0.00275	0.0114	43.45	4.12	12.23	-2.88385	TF|1.2823;C3|1.4997;FBN1|0.207;ANPEP|12.0226;C4A|0.673;ENPEP|21.0863;SERPINA1|29.3765;SERPINA3|19.2309;PSAP|7.656;A2M|7.5858;EFEMP1|0.0904;APOA4|15.2757;F2|0.1009;SERPINA5|0.2109;CDH1|0.7311;ANXA1|0.2089;SERPINC1|3.4674;APOA1|18.8799;MME|5.2481;ENO1|7.8705;HSPA8|4.3251;GAPDH|6.0256;CD55|0.2535;HEXB|2.729;ANXA4|3.342;FBLN1|0.1067;CAT|15.417;SOD1|16.1436;PEBP1|6.7298;BHMT|13.5519;PRDX1|3.1623;IDH1|…	56	9660	159	38520	http://www.ebi.ac.uk/QuickGO/GTerm?id=GO:0080090	[]
6	6	interleukin-8 secretion	GO:0072606	0.00276	0.0114	0.16	-0.31	12.23	-2.88385	ANXA1|0.2089;ANXA4|3.342	2	19	159	38520	http://www.ebi.ac.uk/QuickGO/GTerm?id=GO:0072606	[]
4	4	post-embryonic organ development	GO:0048569	0.00276	0.0114	-1.73	-0.5	12.23	-2.88385	FBN1|0.207;EFEMP1|0.0904	2	19	159	38520	http://www.ebi.ac.uk/QuickGO/GTerm?id=GO:0048569	[]
5	5	cellular response to fluid shear stress	GO:0071498	0.00276	0.0114	0.46	-0.28	12.23	-2.88385	SPP1|0.1406;ASS1|2.4889	2	19	159	38520	http://www.ebi.ac.uk/QuickGO/GTerm?id=GO:0071498	[]
6	6	regulation of heterotypic cell-cell adhesion	GO:0034114	0.00276	0.0114	1.76	-0.15	12.23	-2.88385	APOA1|18.8799;FGG|3.0479	2	19	159	38520	http://www.ebi.ac.uk/QuickGO/GTerm?id=GO:0034114	[]
6	6	fibril organization	GO:0097435	0.00276	0.0114	1.37	-0.19	12.23	-2.88385	HSPA8|4.3251;PARK7|5.445	2	19	159	38520	http://www.ebi.ac.uk/QuickGO/GTerm?id=GO:0097435	[]
5	5	negative regulation of complement activation	GO:0045916	0.00276	0.0114	-0.28	-0.36	12.23	-2.88385	A2M|7.5858;CD55|0.2535	2	19	159	38520	http://www.ebi.ac.uk/QuickGO/GTerm?id=GO:0045916	[]
10	9,10	cellular zinc ion homeostasis	GO:0006882	0.00276	0.0114	-0.93	-0.42	12.23	-2.88385	S100A8|0.2965;S100A9|0.3945	2	19	159	38520	http://www.ebi.ac.uk/QuickGO/GTerm?id=GO:0006882	[]
6	5,6	hematopoietic stem cell proliferation	GO:0071425	0.00276	0.0114	0.19	-0.31	12.23	-2.88385	PRG4|0.2831;ACE|2.2909	2	19	159	38520	http://www.ebi.ac.uk/QuickGO/GTerm?id=GO:0071425	[]
7	5,6,7	positive regulation of triglyceride metabolic process	GO:0090208	0.00276	0.0114	2.46	-0.08	12.23	-2.88385	APOA4|15.2757;APOA1|18.8799	2	19	159	38520	http://www.ebi.ac.uk/QuickGO/GTerm?id=GO:0090208	[]
4	4	establishment of localization in cell	GO:0051649	0.00278	0.0114	21.74	1.9	12.23	-2.88385	ALB|1.2246;TF|1.2823;SERPINA1|29.3765;PSAP|7.656;A2M|7.5858;F2|0.1009;CDH1|0.7311;ANXA1|0.2089;APOA1|18.8799;HSPA8|4.3251;ANXA4|3.342;FBLN1|0.1067;SOD1|16.1436;ALDOA|1.7378;PPIA|7.5858;PVRL2|0.0887;PRDX1|3.1623;LCN2|0.2051;ACTN4|10.8643;PARK7|5.445;HSP90AA1|11.5878;DAG1|3.02;FGG|3.0479;PNP|7.7983;TXN|16.4437;SPINK1|0.5012;CD63|2.0893;CDC42|99.0832	28	3916	159	38520	http://www.ebi.ac.uk/QuickGO/GTerm?id=GO:0051649	[]
6	6	nucleoside diphosphate metabolic process	GO:0009132	0.00279	0.0115	3.88	0.07	12.23	-2.88385	PGK1|6.0256;ENO1|7.8705;TPI1|15.2757;GAPDH|6.0256;ALDOA|1.7378	5	231	159	38520	http://www.ebi.ac.uk/QuickGO/GTerm?id=GO:0009132	[]
5	5	positive regulation of protein metabolic process	GO:0051247	0.00281	0.0115	12.17	0.92	12.23	-2.88385	TF|1.2823;C3|1.4997;PSAP|7.656;F2|0.1009;FBLN1|0.1067;SOD1|16.1436;S100A8|0.2965;S100A9|0.3945;PARK7|5.445;FGG|3.0479;TXN|16.4437;ELANE|0.4246;ACE|2.2909;ACVR1B|0.1294;FGFR4|6.9823;CDC42|99.0832	16	1772	159	38520	http://www.ebi.ac.uk/QuickGO/GTerm?id=GO:0051247	[]
7	7	anion homeostasis	GO:0055081	0.00284	0.0116	2.61	-0.06	12.23	-2.88385	APOA1|18.8799;CKB|3.0761;FGFR4|6.9823	3	68	159	38520	http://www.ebi.ac.uk/QuickGO/GTerm?id=GO:0055081	[]
8	8	blood vessel endothelial cell migration	GO:0043534	0.00284	0.0116	-1.28	-0.46	12.23	-2.88385	APOA1|18.8799;SH3BGRL3|0.0461;EPHB4|0.6081	3	68	159	38520	http://www.ebi.ac.uk/QuickGO/GTerm?id=GO:0043534	[]
6	5,6	regulation of cytokine secretion	GO:0050707	0.00292	0.0119	-0.15	-0.34	12.23	-2.88385	ANXA1|0.2089;APOA1|18.8799;ANXA4|3.342;FBLN1|0.1067	4	142	159	38520	http://www.ebi.ac.uk/QuickGO/GTerm?id=GO:0050707	[]
7	5,6,7	apoptotic signaling pathway	GO:0097190	0.00293	0.012	2.35	-0.09	12.23	-2.88385	SOD1|16.1436;HSPA1B|4.3652;S100A8|0.2965;S100A9|0.3945;PARK7|5.445;GSTP1|11.8032;FGG|3.0479;SHISA5|0.2965;ACVR1B|0.1294	9	712	159	38520	http://www.ebi.ac.uk/QuickGO/GTerm?id=GO:0097190	[]
5	4,5	lipid storage	GO:0019915	0.00296	0.0121	1.89	-0.13	12.23	-2.88385	C3|1.4997;APOA1|18.8799;HEXB|2.729	3	69	159	38520	http://www.ebi.ac.uk/QuickGO/GTerm?id=GO:0019915	[]
6	5,6	regulation of endocytosis	GO:0030100	0.00301	0.0122	0.77	-0.25	12.23	-2.88385	C3|1.4997;C4A|0.673;OLFM4|0.2512;ACTN4|10.8643;CD63|2.0893	5	235	159	38520	http://www.ebi.ac.uk/QuickGO/GTerm?id=GO:0030100	[]
7	7	gliogenesis	GO:0042063	0.00306	0.0124	1.68	-0.16	12.23	-2.88385	F2|0.1009;ANXA1|0.2089;HEXB|2.729;SOD1|16.1436;DAG1|3.02	5	236	159	38520	http://www.ebi.ac.uk/QuickGO/GTerm?id=GO:0042063	[]
5	5	regulation of vasculature development	GO:1901342	0.00306	0.0124	3.32	0.01	12.23	-2.88385	C3|1.4997;KLK3|4.4875;APOH|11.9124;SERPINF1|3.2509;ECM1|7.9433	5	236	159	38520	http://www.ebi.ac.uk/QuickGO/GTerm?id=GO:1901342	[]
8	6,7,8	regulation of I-kappaB kinase/NF-kappaB signaling	GO:0043122	0.00306	0.0124	1.13	-0.21	12.23	-2.88385	OLFM4|0.2512;PRDX1|3.1623;GSTP1|11.8032;SHISA5|0.2965;ECM1|7.9433	5	236	159	38520	http://www.ebi.ac.uk/QuickGO/GTerm?id=GO:0043122	[]
4	4	negative regulation of protein activation cascade	GO:2000258	0.00306	0.0124	-0.28	-0.36	12.23	-2.88385	A2M|7.5858;CD55|0.2535	2	20	159	38520	http://www.ebi.ac.uk/QuickGO/GTerm?id=GO:2000258	[]
5	5	lipid digestion	GO:0044241	0.00306	0.0124	2.46	-0.08	12.23	-2.88385	APOA4|15.2757;APOA1|18.8799	2	20	159	38520	http://www.ebi.ac.uk/QuickGO/GTerm?id=GO:0044241	[]
6	6	vitamin D metabolic process	GO:0042359	0.00306	0.0124	-0.8	-0.41	12.23	-2.88385	LRP2|0.4365;CUBN|0.3597	2	20	159	38520	http://www.ebi.ac.uk/QuickGO/GTerm?id=GO:0042359	[]
4	4	tissue remodeling	GO:0048771	0.00307	0.0124	1.06	-0.22	12.23	-2.88385	TF|1.2823;SPP1|0.1406;ANXA1|0.2089;ACE|2.2909	4	144	159	38520	http://www.ebi.ac.uk/QuickGO/GTerm?id=GO:0048771	[]
3	3	nitrogen compound metabolic process	GO:0006807	0.00311	0.0125	55.87	5.39	12.23	-2.88385	TF|1.2823;CUBN|0.3597;FBN1|0.207;ANPEP|12.0226;ENPEP|21.0863;PSAP|7.656;EFEMP1|0.0904;APOA4|15.2757;GGT1|5.2;CDH1|0.7311;ANXA1|0.2089;APOA1|18.8799;MME|5.2481;ACY1|17.378;NAGLU|8.3946;PGK1|6.0256;ENO1|7.8705;GLB1|2.5119;HSPA8|4.3251;TPI1|15.2757;GAPDH|6.0256;HBB|1.6904;GNS|3.8019;ENDOD1|0.1432;ACPP|5.4954;ARSA|15.8489;HEXB|2.729;ANXA4|3.342;PRDX2|35.6451;ASAH1|4.9204;LDHB|8.9536;CAT|15.417;SOD1|1…	71	13062	159	38520	http://www.ebi.ac.uk/QuickGO/GTerm?id=GO:0006807	[]
7	7	cation homeostasis	GO:0055080	0.00315	0.0127	-5.34	-0.87	12.23	-2.88385	TF|1.2823;F2|0.1009;CD55|0.2535;HEXB|2.729;SOD1|16.1436;LCN2|0.2051;S100A8|0.2965;S100A9|0.3945;ELANE|0.4246	9	720	159	38520	http://www.ebi.ac.uk/QuickGO/GTerm?id=GO:0055080	[]
7	7	nucleotide phosphorylation	GO:0046939	0.00318	0.0128	3.88	0.07	12.23	-2.88385	PGK1|6.0256;ENO1|7.8705;TPI1|15.2757;GAPDH|6.0256;ALDOA|1.7378	5	238	159	38520	http://www.ebi.ac.uk/QuickGO/GTerm?id=GO:0046939	[]
8	7,8	regulation of T cell proliferation	GO:0042129	0.00322	0.013	-2.5	-0.58	12.23	-2.88385	CD55|0.2535;IGFBP2|0.2754;PNP|7.7983;SCGB1A1|0.3532	4	146	159	38520	http://www.ebi.ac.uk/QuickGO/GTerm?id=GO:0042129	[]
2	2	behavior	GO:0007610	0.00327	0.0131	6.45	0.33	12.23	-2.88385	DPP4|4.7424;GAA|14.4544;NAGLU|8.3946;HEXB|2.729;SOD1|16.1436;SERPINF1|3.2509;PARK7|5.445;AHCY|2.6546;ELANE|0.4246	9	724	159	38520	http://www.ebi.ac.uk/QuickGO/GTerm?id=GO:0007610	[]
5	5	isoprenoid metabolic process	GO:0006720	0.0033	0.0132	3.1	-0.01	12.23	-2.88385	LRP2|0.4365;APOA4|15.2757;APOA1|18.8799;TTR|1.9055	4	147	159	38520	http://www.ebi.ac.uk/QuickGO/GTerm?id=GO:0006720	[]
5	5	cellular response to mechanical stimulus	GO:0071260	0.00334	0.0134	-1.5	-0.48	12.23	-2.88385	F2|0.1009;ARHGDIA|31.3329;MMP7|0.0619	3	72	159	38520	http://www.ebi.ac.uk/QuickGO/GTerm?id=GO:0071260	[]
4	4	protein localization	GO:0008104	0.00334	0.0134	19.41	1.66	12.23	-2.88385	TF|1.2823;CUBN|0.3597;PIGR|0.7586;FBN1|0.207;CDH1|0.7311;ANXA1|0.2089;APOA1|18.8799;FBLN5|0.2249;ANXA4|3.342;FBLN1|0.1067;CPE|4.4055;PPIA|7.5858;PRDX1|3.1623;ACTN4|10.8643;MADCAM1|0.7178;PARK7|5.445;HSP90AA1|11.5878;DAG1|3.02;FGG|3.0479;PNP|7.7983;TXN|16.4437;CD63|2.0893;ARHGDIA|31.3329;PLEKHA1|85.5067;CDC42|99.0832	25	3401	159	38520	http://www.ebi.ac.uk/QuickGO/GTerm?id=GO:0008104	[]
5	5	negative regulation of humoral immune response	GO:0002921	0.00338	0.0134	-0.28	-0.36	12.23	-2.88385	A2M|7.5858;CD55|0.2535	2	21	159	38520	http://www.ebi.ac.uk/QuickGO/GTerm?id=GO:0002921	[]
7	4,5,7	plasma lipoprotein particle assembly	GO:0034377	0.00338	0.0134	2.46	-0.08	12.23	-2.88385	APOA4|15.2757;APOA1|18.8799	2	21	159	38520	http://www.ebi.ac.uk/QuickGO/GTerm?id=GO:0034377	[]
12	9,10,11,12	activation of protein kinase B activity	GO:0032148	0.00338	0.0134	1.95	-0.13	12.23	-2.88385	PARK7|5.445;TXN|16.4437	2	21	159	38520	http://www.ebi.ac.uk/QuickGO/GTerm?id=GO:0032148	[]
8	7,8	phospholipid efflux	GO:0033700	0.00338	0.0134	2.46	-0.08	12.23	-2.88385	APOA4|15.2757;APOA1|18.8799	2	21	159	38520	http://www.ebi.ac.uk/QuickGO/GTerm?id=GO:0033700	[]
9	9	zinc ion homeostasis	GO:0055069	0.00338	0.0134	-0.93	-0.42	12.23	-2.88385	S100A8|0.2965;S100A9|0.3945	2	21	159	38520	http://www.ebi.ac.uk/QuickGO/GTerm?id=GO:0055069	[]
7	6,7	protein oligomerization	GO:0051259	0.00339	0.0135	4.2	0.1	12.23	-2.88385	OLFM4|0.2512;HBB|1.6904;CAT|15.417;ALDOA|1.7378;HBA1|1.6144;GPX3|15.1356;ANXA5|3.6308	7	467	159	38520	http://www.ebi.ac.uk/QuickGO/GTerm?id=GO:0051259	[]
4	4	epithelial cell proliferation	GO:0050673	0.00344	0.0136	5.9	0.28	12.23	-2.88385	CDH1|0.7311;APOA1|18.8799;APOH|11.9124;SERPINF1|3.2509;CDC42|99.0832;ECM1|7.9433	6	350	159	38520	http://www.ebi.ac.uk/QuickGO/GTerm?id=GO:0050673	[]
9	6,7,8,9	positive regulation of MAPK cascade	GO:0043410	0.00346	0.0137	6.07	0.29	12.23	-2.88385	TF|1.2823;C3|1.4997;PSAP|7.656;SOD1|16.1436;FGG|3.0479;ELANE|0.4246;FGFR4|6.9823;CDC42|99.0832	8	596	159	38520	http://www.ebi.ac.uk/QuickGO/GTerm?id=GO:0043410	[]
7	6,7	integrin-mediated signaling pathway	GO:0007229	0.00355	0.014	-0.48	-0.38	12.23	-2.88385	APOA1|18.8799;FBLN1|0.1067;MADCAM1|0.7178;CD63|2.0893	4	150	159	38520	http://www.ebi.ac.uk/QuickGO/GTerm?id=GO:0007229	[]
7	6,7	positive regulation of protein modification process	GO:0031401	0.00357	0.0141	10.27	0.72	12.23	-2.88385	TF|1.2823;C3|1.4997;PSAP|7.656;F2|0.1009;SOD1|16.1436;PARK7|5.445;FGG|3.0479;TXN|16.4437;ELANE|0.4246;ACE|2.2909;ACVR1B|0.1294;FGFR4|6.9823;CDC42|99.0832	13	1328	159	38520	http://www.ebi.ac.uk/QuickGO/GTerm?id=GO:0031401	[]
7	5,6,7	negative regulation of intracellular signal transduction	GO:1902532	0.00359	0.0142	1.87	-0.14	12.23	-2.88385	OLFM4|0.2512;FBLN1|0.1067;PARK7|5.445;GSTP1|11.8032;DAG1|3.02;SPINK1|0.5012;PLEKHA1|85.5067	7	472	159	38520	http://www.ebi.ac.uk/QuickGO/GTerm?id=GO:1902532	[]
10	6,9,10	positive regulation of NF-kappaB transcription factor activity	GO:0051092	0.00364	0.0143	-0.9	-0.42	12.23	-2.88385	CAT|15.417;HSPA1B|4.3652;S100A8|0.2965;S100A9|0.3945	4	151	159	38520	http://www.ebi.ac.uk/QuickGO/GTerm?id=GO:0051092	[]
9	8,9	reverse cholesterol transport	GO:0043691	0.0037	0.0146	2.46	-0.08	12.23	-2.88385	APOA4|15.2757;APOA1|18.8799	2	22	159	38520	http://www.ebi.ac.uk/QuickGO/GTerm?id=GO:0043691	[]
7	5,6,7	positive regulation of macroautophagy	GO:0016239	0.00372	0.0146	2.64	-0.06	12.23	-2.88385	ANXA5|3.6308;PARK7|5.445;FABP1|14.3219;MYLK|0.6427	4	152	159	38520	http://www.ebi.ac.uk/QuickGO/GTerm?id=GO:0016239	[]
4	4	myeloid leukocyte migration	GO:0097529	0.00372	0.0146	-2.38	-0.57	12.23	-2.88385	SPP1|0.1406;OLFM4|0.2512;S100A8|0.2965;S100A9|0.3945	4	152	159	38520	http://www.ebi.ac.uk/QuickGO/GTerm?id=GO:0097529	[]
7	7	purine ribonucleotide metabolic process	GO:0009150	0.00374	0.0147	6.98	0.39	12.23	-2.88385	PGK1|6.0256;ENO1|7.8705;HSPA8|4.3251;TPI1|15.2757;GAPDH|6.0256;ALDOA|1.7378;HSPA1B|4.3652;PARK7|5.445;BPNT1|12.2462	9	739	159	38520	http://www.ebi.ac.uk/QuickGO/GTerm?id=GO:0009150	[]
5	5	response to axon injury	GO:0048678	0.00375	0.0147	0.85	-0.24	12.23	-2.88385	SPP1|0.1406;APOA1|18.8799;SOD1|16.1436	3	75	159	38520	http://www.ebi.ac.uk/QuickGO/GTerm?id=GO:0048678	[]
5	4,5	positive regulation of cell motility	GO:2000147	0.00379	0.0148	-3.34	-0.67	12.23	-2.88385	TF|1.2823;FBLN1|0.1067;ACTN4|10.8643;MADCAM1|0.7178;ACVR1B|0.1294;MYLK|0.6427	6	357	159	38520	http://www.ebi.ac.uk/QuickGO/GTerm?id=GO:2000147	[]
7	6,7	peptide transport	GO:0015833	0.00384	0.0148	-3.8	-0.72	12.23	-2.88385	ANXA1|0.2089;PRDX1|3.1623;S100A8|0.2965;S100A9|0.3945;FGG|3.0479;MMP7|0.0619	6	358	159	38520	http://www.ebi.ac.uk/QuickGO/GTerm?id=GO:0015833	[]
5	4,5	regulation of vesicle-mediated transport	GO:0060627	0.00387	0.0148	-0.26	-0.36	12.23	-2.88385	C3|1.4997;C4A|0.673;ANXA1|0.2089;OLFM4|0.2512;ACTN4|10.8643;FGG|3.0479;SPINK1|0.5012;CD63|2.0893	8	607	159	38520	http://www.ebi.ac.uk/QuickGO/GTerm?id=GO:0060627	[]
5	5	lipid catabolic process	GO:0016042	0.00389	0.0148	5.26	0.21	12.23	-2.88385	APOA4|15.2757;APOA1|18.8799;HEXB|2.729;IDH1|2.3335;PRDX6|6.9183;FABP1|14.3219	6	359	159	38520	http://www.ebi.ac.uk/QuickGO/GTerm?id=GO:0016042	[]
3	3	negative regulation of transport	GO:0051051	0.00389	0.0148	1.95	-0.13	12.23	-2.88385	ANXA1|0.2089;APOA1|18.8799;ANXA4|3.342;FBLN1|0.1067;PARK7|5.445;TXN|16.4437;SPINK1|0.5012	7	479	159	38520	http://www.ebi.ac.uk/QuickGO/GTerm?id=GO:0051051	[]
7	7	cellular response to tumor necrosis factor	GO:0071356	0.0039	0.0148	3.38	0.02	12.23	-2.88385	APOA1|18.8799;ASS1|2.4889;HSPA1B|4.3652;GSTP1|11.8032	4	154	159	38520	http://www.ebi.ac.uk/QuickGO/GTerm?id=GO:0071356	[]
7	6,7	protein kinase B signaling	GO:0043491	0.0039	0.0148	4.36	0.12	12.23	-2.88385	PARK7|5.445;DAG1|3.02;TXN|16.4437;PLEKHA1|85.5067	4	154	159	38520	http://www.ebi.ac.uk/QuickGO/GTerm?id=GO:0043491	[]
4	4	regulation of system process	GO:0044057	0.00394	0.0148	6.41	0.33	12.23	-2.88385	GAA|14.4544;APOA4|15.2757;APOA1|18.8799;ACPP|5.4954;SOD1|16.1436;FGG|3.0479;ACE|2.2909	7	480	159	38520	http://www.ebi.ac.uk/QuickGO/GTerm?id=GO:0044057	[]
3	3	multi-organism cellular process	GO:0044764	0.00399	0.0148	7.1	0.4	12.23	-2.88385	ALB|1.2246;ANPEP|12.0226;DPP4|4.7424;HSPA8|4.3251;CD55|0.2535;FBLN1|0.1067;PPIA|7.5858;PVRL2|0.0887;HSPA1B|4.3652;DAG1|3.02	10	889	159	38520	http://www.ebi.ac.uk/QuickGO/GTerm?id=GO:0044764	[]
5	5	cellular carbohydrate catabolic process	GO:0044275	0.00404	0.0148	2.26	-0.1	12.23	-2.88385	MGAM|7.379;GAA|14.4544;SORD|1.7219	3	77	159	38520	http://www.ebi.ac.uk/QuickGO/GTerm?id=GO:0044275	[]
7	5,6,7	positive regulation of steroid metabolic process	GO:0045940	0.00405	0.0148	2.46	-0.08	12.23	-2.88385	APOA4|15.2757;APOA1|18.8799	2	23	159	38520	http://www.ebi.ac.uk/QuickGO/GTerm?id=GO:0045940	[]
8	7,8	regulation of myeloid cell apoptotic process	GO:0033032	0.00405	0.0148	-0.4	-0.37	12.23	-2.88385	ANXA1|0.2089;APOH|11.9124	2	23	159	38520	http://www.ebi.ac.uk/QuickGO/GTerm?id=GO:0033032	[]
7	7	cellular response to dexamethasone stimulus	GO:0071549	0.00405	0.0148	0.91	-0.24	12.23	-2.88385	ASS1|2.4889;SERPINF1|3.2509	2	23	159	38520	http://www.ebi.ac.uk/QuickGO/GTerm?id=GO:0071549	[]
5	4,5	multicellular organism growth	GO:0035264	0.00408	0.0148	6.21	0.31	12.23	-2.88385	HEG1|0.0839;SOD1|16.1436;PLEKHA1|85.5067;CDC42|99.0832	4	156	159	38520	http://www.ebi.ac.uk/QuickGO/GTerm?id=GO:0035264	[]
4	4	cellular amino acid metabolic process	GO:0006520	0.00411	0.0148	7.1	0.4	12.23	-2.88385	GGT1|5.2;ACY1|17.378;BHMT|13.5519;ASS1|2.4889;PARK7|5.445;CNDP2|17.0608;AHCY|2.6546;CKB|3.0761;FAH|5.445	9	750	159	38520	http://www.ebi.ac.uk/QuickGO/GTerm?id=GO:0006520	[]
7	6,7	positive regulation of dopamine biosynthetic process	GO:1903181	0.00413	0.0148	0	-0.33	12.23	-2.88385	PARK7|5.445	1	1	159	38520	http://www.ebi.ac.uk/QuickGO/GTerm?id=GO:1903181	[]
8	5,6,7,8	negative regulation of transformation of host cell by virus	GO:1904188	0.00413	0.0148	0	-0.33	12.23	-2.88385	FBLN1|0.1067	1	1	159	38520	http://www.ebi.ac.uk/QuickGO/GTerm?id=GO:1904188	[]
9	6,7,8,9	positive regulation of androgen receptor activity	GO:2000825	0.00413	0.0148	0	-0.33	12.23	-2.88385	PARK7|5.445	1	1	159	38520	http://www.ebi.ac.uk/QuickGO/GTerm?id=GO:2000825	[]
7	5,7	detoxification of mercury ion	GO:0050787	0.00413	0.0148	0	-0.33	12.23	-2.88385	PARK7|5.445	1	1	159	38520	http://www.ebi.ac.uk/QuickGO/GTerm?id=GO:0050787	[]
7	7	primary alcohol biosynthetic process	GO:0034309	0.00413	0.0148	0	-0.33	12.23	-2.88385	PARK7|5.445	1	1	159	38520	http://www.ebi.ac.uk/QuickGO/GTerm?id=GO:0034309	[]
7	5,6,7	regulation of transformation of host cell by virus	GO:1904187	0.00413	0.0148	0	-0.33	12.23	-2.88385	FBLN1|0.1067	1	1	159	38520	http://www.ebi.ac.uk/QuickGO/GTerm?id=GO:1904187	[]
6	6	glyoxal catabolic process	GO:1903190	0.00413	0.0148	0	-0.33	12.23	-2.88385	PARK7|5.445	1	1	159	38520	http://www.ebi.ac.uk/QuickGO/GTerm?id=GO:1903190	[]
6	5,6	L-dopa metabolic process	GO:1903184	0.00413	0.0148	0	-0.33	12.23	-2.88385	PARK7|5.445	1	1	159	38520	http://www.ebi.ac.uk/QuickGO/GTerm?id=GO:1903184	[]
7	7	TRAIL receptor biosynthetic process	GO:0045557	0.00413	0.0148	0	-0.33	12.23	-2.88385	PARK7|5.445	1	1	159	38520	http://www.ebi.ac.uk/QuickGO/GTerm?id=GO:0045557	[]
7	6,7	regulation of dopamine biosynthetic process	GO:1903179	0.00413	0.0148	0	-0.33	12.23	-2.88385	PARK7|5.445	1	1	159	38520	http://www.ebi.ac.uk/QuickGO/GTerm?id=GO:1903179	[]
6	5,6	vacuolar sequestering	GO:0043181	0.00413	0.0148	0	-0.33	12.23	-2.88385	GAA|14.4544	1	1	159	38520	http://www.ebi.ac.uk/QuickGO/GTerm?id=GO:0043181	[]
6	5,6	uncoating of virus	GO:0019061	0.00413	0.0148	0	-0.33	12.23	-2.88385	PPIA|7.5858	1	1	159	38520	http://www.ebi.ac.uk/QuickGO/GTerm?id=GO:0019061	[]
5	5	nerve maturation	GO:0021682	0.00413	0.0148	0	-0.33	12.23	-2.88385	DAG1|3.02	1	1	159	38520	http://www.ebi.ac.uk/QuickGO/GTerm?id=GO:0021682	[]
7	6,7	positive regulation of pyrroline-5-carboxylate reductase activity	GO:1903168	0.00413	0.0148	0	-0.33	12.23	-2.88385	PARK7|5.445	1	1	159	38520	http://www.ebi.ac.uk/QuickGO/GTerm?id=GO:1903168	[]
8	7,8	positive regulation of L-dopa biosynthetic process	GO:1903197	0.00413	0.0148	0	-0.33	12.23	-2.88385	PARK7|5.445	1	1	159	38520	http://www.ebi.ac.uk/QuickGO/GTerm?id=GO:1903197	[]
5	5	response to silicon dioxide	GO:0034021	0.00413	0.0148	0	-0.33	12.23	-2.88385	SCGB1A1|0.3532	1	1	159	38520	http://www.ebi.ac.uk/QuickGO/GTerm?id=GO:0034021	[]
6	6	glutathione catabolic process	GO:0006751	0.00413	0.0148	0	-0.33	12.23	-2.88385	GGT1|5.2	1	1	159	38520	http://www.ebi.ac.uk/QuickGO/GTerm?id=GO:0006751	[]
8	6,8	coreceptor-mediated virion attachment to host cell	GO:0046814	0.00413	0.0148	0	-0.33	12.23	-2.88385	PVRL2|0.0887	1	1	159	38520	http://www.ebi.ac.uk/QuickGO/GTerm?id=GO:0046814	[]
7	6,7	homocysteine biosynthetic process	GO:0071268	0.00413	0.0148	0	-0.33	12.23	-2.88385	AHCY|2.6546	1	1	159	38520	http://www.ebi.ac.uk/QuickGO/GTerm?id=GO:0071268	[]
6	6	regulation of pyrroline-5-carboxylate reductase activity	GO:1903167	0.00413	0.0148	0	-0.33	12.23	-2.88385	PARK7|5.445	1	1	159	38520	http://www.ebi.ac.uk/QuickGO/GTerm?id=GO:1903167	[]
11	10,11	NAD biosynthesis via nicotinamide riboside salvage pathway	GO:0034356	0.00413	0.0148	0	-0.33	12.23	-2.88385	PNP|7.7983	1	1	159	38520	http://www.ebi.ac.uk/QuickGO/GTerm?id=GO:0034356	[]
12	8,9,10,11,12	negative regulation of TRAIL-activated apoptotic signaling pathway	GO:1903122	0.00413	0.0148	0	-0.33	12.23	-2.88385	PARK7|5.445	1	1	159	38520	http://www.ebi.ac.uk/QuickGO/GTerm?id=GO:1903122	[]
7	6,7	L-dopa biosynthetic process	GO:1903185	0.00413	0.0148	0	-0.33	12.23	-2.88385	PARK7|5.445	1	1	159	38520	http://www.ebi.ac.uk/QuickGO/GTerm?id=GO:1903185	[]
5	5	glyoxal metabolic process	GO:1903189	0.00413	0.0148	0	-0.33	12.23	-2.88385	PARK7|5.445	1	1	159	38520	http://www.ebi.ac.uk/QuickGO/GTerm?id=GO:1903189	[]
8	3,8	nitric oxide storage	GO:0035732	0.00413	0.0148	0	-0.33	12.23	-2.88385	GSTP1|11.8032	1	1	159	38520	http://www.ebi.ac.uk/QuickGO/GTerm?id=GO:0035732	[]
5	5	neutrophil clearance	GO:0097350	0.00413	0.0148	0	-0.33	12.23	-2.88385	ANXA1|0.2089	1	1	159	38520	http://www.ebi.ac.uk/QuickGO/GTerm?id=GO:0097350	[]
8	7,8	L-xylitol catabolic process	GO:0051160	0.00413	0.0148	0	-0.33	12.23	-2.88385	SORD|1.7219	1	1	159	38520	http://www.ebi.ac.uk/QuickGO/GTerm?id=GO:0051160	[]
7	6,7	male courtship behavior	GO:0008049	0.00413	0.0148	0	-0.33	12.23	-2.88385	HEXB|2.729	1	1	159	38520	http://www.ebi.ac.uk/QuickGO/GTerm?id=GO:0008049	[]
8	7,8	sorbitol catabolic process	GO:0006062	0.00413	0.0148	0	-0.33	12.23	-2.88385	SORD|1.7219	1	1	159	38520	http://www.ebi.ac.uk/QuickGO/GTerm?id=GO:0006062	[]
10	6,7,8,9,10	negative regulation of death-inducing signaling complex assembly	GO:1903073	0.00413	0.0148	0	-0.33	12.23	-2.88385	PARK7|5.445	1	1	159	38520	http://www.ebi.ac.uk/QuickGO/GTerm?id=GO:1903073	[]
5	4,5	negative regulation of cell adhesion molecule production	GO:0060354	0.00413	0.0148	0	-0.33	12.23	-2.88385	APOA1|18.8799	1	1	159	38520	http://www.ebi.ac.uk/QuickGO/GTerm?id=GO:0060354	[]
6	6	cellular response to glyoxal	GO:0036471	0.00413	0.0148	0	-0.33	12.23	-2.88385	PARK7|5.445	1	1	159	38520	http://www.ebi.ac.uk/QuickGO/GTerm?id=GO:0036471	[]
7	6,7	positive regulation of L-dopa decarboxylase activity	GO:1903200	0.00413	0.0148	0	-0.33	12.23	-2.88385	PARK7|5.445	1	1	159	38520	http://www.ebi.ac.uk/QuickGO/GTerm?id=GO:1903200	[]
6	6	enzyme active site formation via L-cysteine sulfinic acid	GO:0018323	0.00413	0.0148	0	-0.33	12.23	-2.88385	PARK7|5.445	1	1	159	38520	http://www.ebi.ac.uk/QuickGO/GTerm?id=GO:0018323	[]
6	6	antibacterial peptide secretion	GO:0002779	0.00413	0.0148	0	-0.33	12.23	-2.88385	MMP7|0.0619	1	1	159	38520	http://www.ebi.ac.uk/QuickGO/GTerm?id=GO:0002779	[]
6	6	methylglyoxal catabolic process	GO:0051596	0.00413	0.0148	0	-0.33	12.23	-2.88385	PARK7|5.445	1	1	159	38520	http://www.ebi.ac.uk/QuickGO/GTerm?id=GO:0051596	[]
5	5	positive regulation of oxidative phosphorylation uncoupler activity	GO:2000277	0.00413	0.0148	0	-0.33	12.23	-2.88385	PARK7|5.445	1	1	159	38520	http://www.ebi.ac.uk/QuickGO/GTerm?id=GO:2000277	[]
9	9	inosine catabolic process	GO:0006148	0.00413	0.0148	0	-0.33	12.23	-2.88385	PNP|7.7983	1	1	159	38520	http://www.ebi.ac.uk/QuickGO/GTerm?id=GO:0006148	[]
6	5,6	regulation of death-inducing signaling complex assembly	GO:1903072	0.00413	0.0148	0	-0.33	12.23	-2.88385	PARK7|5.445	1	1	159	38520	http://www.ebi.ac.uk/QuickGO/GTerm?id=GO:1903072	[]
7	6,7	methylglyoxal catabolic process to lactate	GO:0061727	0.00413	0.0148	0	-0.33	12.23	-2.88385	PARK7|5.445	1	1	159	38520	http://www.ebi.ac.uk/QuickGO/GTerm?id=GO:0061727	[]
8	7,8	positive regulation of tyrosine 3-monooxygenase activity	GO:1903178	0.00413	0.0148	0	-0.33	12.23	-2.88385	PARK7|5.445	1	1	159	38520	http://www.ebi.ac.uk/QuickGO/GTerm?id=GO:1903178	[]
6	5,6	pentitol metabolic process	GO:0019519	0.00413	0.0148	0	-0.33	12.23	-2.88385	SORD|1.7219	1	1	159	38520	http://www.ebi.ac.uk/QuickGO/GTerm?id=GO:0019519	[]
7	6,7	negative regulation of fibril organization	GO:1902904	0.00413	0.0148	0	-0.33	12.23	-2.88385	HSPA8|4.3251	1	1	159	38520	http://www.ebi.ac.uk/QuickGO/GTerm?id=GO:1902904	[]
7	5,6,7	sucrose metabolic process	GO:0005985	0.00413	0.0148	0	-0.33	12.23	-2.88385	GAA|14.4544	1	1	159	38520	http://www.ebi.ac.uk/QuickGO/GTerm?id=GO:0005985	[]
8	5,6,8	argininosuccinate metabolic process	GO:0000053	0.00413	0.0148	0	-0.33	12.23	-2.88385	ASS1|2.4889	1	1	159	38520	http://www.ebi.ac.uk/QuickGO/GTerm?id=GO:0000053	[]
8	7,8	regulation of L-dopa biosynthetic process	GO:1903195	0.00413	0.0148	0	-0.33	12.23	-2.88385	PARK7|5.445	1	1	159	38520	http://www.ebi.ac.uk/QuickGO/GTerm?id=GO:1903195	[]
6	6	regulation of L-dopa decarboxylase activity	GO:1903198	0.00413	0.0148	0	-0.33	12.23	-2.88385	PARK7|5.445	1	1	159	38520	http://www.ebi.ac.uk/QuickGO/GTerm?id=GO:1903198	[]
8	8	glycolate biosynthetic process	GO:0046295	0.00413	0.0148	0	-0.33	12.23	-2.88385	PARK7|5.445	1	1	159	38520	http://www.ebi.ac.uk/QuickGO/GTerm?id=GO:0046295	[]
9	5,7,8,9	antimicrobial peptide secretion	GO:0002776	0.00413	0.0148	0	-0.33	12.23	-2.88385	MMP7|0.0619	1	1	159	38520	http://www.ebi.ac.uk/QuickGO/GTerm?id=GO:0002776	[]
9	7,8,9	starch catabolic process	GO:0005983	0.00413	0.0148	0	-0.33	12.23	-2.88385	MGAM|7.379	1	1	159	38520	http://www.ebi.ac.uk/QuickGO/GTerm?id=GO:0005983	[]
7	6,7	hexitol catabolic process	GO:0019407	0.00413	0.0148	0	-0.33	12.23	-2.88385	SORD|1.7219	1	1	159	38520	http://www.ebi.ac.uk/QuickGO/GTerm?id=GO:0019407	[]
8	7,8	starch metabolic process	GO:0005982	0.00413	0.0148	0	-0.33	12.23	-2.88385	MGAM|7.379	1	1	159	38520	http://www.ebi.ac.uk/QuickGO/GTerm?id=GO:0005982	[]
7	6,7	pentitol catabolic process	GO:0019527	0.00413	0.0148	0	-0.33	12.23	-2.88385	SORD|1.7219	1	1	159	38520	http://www.ebi.ac.uk/QuickGO/GTerm?id=GO:0019527	[]
4	4	psychomotor behavior	GO:0036343	0.00413	0.0148	0	-0.33	12.23	-2.88385	DPP4|4.7424	1	1	159	38520	http://www.ebi.ac.uk/QuickGO/GTerm?id=GO:0036343	[]
10	6,7,9,10	S-adenosylhomocysteine catabolic process	GO:0019510	0.00413	0.0148	0	-0.33	12.23	-2.88385	AHCY|2.6546	1	1	159	38520	http://www.ebi.ac.uk/QuickGO/GTerm?id=GO:0019510	[]
8	6,7,8	negative regulation of gap junction assembly	GO:1903597	0.00413	0.0148	0	-0.33	12.23	-2.88385	ACE|2.2909	1	1	159	38520	http://www.ebi.ac.uk/QuickGO/GTerm?id=GO:1903597	[]
6	6	lymph circulation	GO:0003017	0.00413	0.0148	0	-0.33	12.23	-2.88385	HEG1|0.0839	1	1	159	38520	http://www.ebi.ac.uk/QuickGO/GTerm?id=GO:0003017	[]
8	6,7,8	regulation of TRAIL receptor biosynthetic process	GO:0045560	0.00413	0.0148	0	-0.33	12.23	-2.88385	PARK7|5.445	1	1	159	38520	http://www.ebi.ac.uk/QuickGO/GTerm?id=GO:0045560	[]
6	6	negative regulation of collateral sprouting of intact axon in response to injury	GO:0048685	0.00413	0.0148	0	-0.33	12.23	-2.88385	SPP1|0.1406	1	1	159	38520	http://www.ebi.ac.uk/QuickGO/GTerm?id=GO:0048685	[]
8	7,8	methylglyoxal catabolic process to D-lactate via S-lactoyl-glutathione	GO:0019243	0.00413	0.0148	0	-0.33	12.23	-2.88385	PARK7|5.445	1	1	159	38520	http://www.ebi.ac.uk/QuickGO/GTerm?id=GO:0019243	[]
8	6,8	positive regulation of cellular amino acid biosynthetic process	GO:2000284	0.00413	0.0148	0	-0.33	12.23	-2.88385	PARK7|5.445	1	1	159	38520	http://www.ebi.ac.uk/QuickGO/GTerm?id=GO:2000284	[]
7	6,7	L-xylitol metabolic process	GO:0051164	0.00413	0.0148	0	-0.33	12.23	-2.88385	SORD|1.7219	1	1	159	38520	http://www.ebi.ac.uk/QuickGO/GTerm?id=GO:0051164	[]
7	7	regulation of tyrosine 3-monooxygenase activity	GO:1903176	0.00413	0.0148	0	-0.33	12.23	-2.88385	PARK7|5.445	1	1	159	38520	http://www.ebi.ac.uk/QuickGO/GTerm?id=GO:1903176	[]
6	5,6	positive regulation of response to extracellular stimulus	GO:0032106	0.00418	0.0149	2.64	-0.06	12.23	-2.88385	ANXA5|3.6308;PARK7|5.445;FABP1|14.3219;MYLK|0.6427	4	157	159	38520	http://www.ebi.ac.uk/QuickGO/GTerm?id=GO:0032106	[]
7	6,7	positive regulation of response to nutrient levels	GO:0032109	0.00418	0.0149	2.64	-0.06	12.23	-2.88385	ANXA5|3.6308;PARK7|5.445;FABP1|14.3219;MYLK|0.6427	4	157	159	38520	http://www.ebi.ac.uk/QuickGO/GTerm?id=GO:0032109	[]
5	5	nitric oxide metabolic process	GO:0046209	0.00419	0.015	1.69	-0.16	12.23	-2.88385	HBB|1.6904;ASS1|2.4889;HSP90AA1|11.5878	3	78	159	38520	http://www.ebi.ac.uk/QuickGO/GTerm?id=GO:0046209	[]
4	4	positive regulation of cellular component movement	GO:0051272	0.00422	0.0151	-3.34	-0.67	12.23	-2.88385	TF|1.2823;FBLN1|0.1067;ACTN4|10.8643;MADCAM1|0.7178;ACVR1B|0.1294;MYLK|0.6427	6	365	159	38520	http://www.ebi.ac.uk/QuickGO/GTerm?id=GO:0051272	[]
8	6,7,8	regulation of intrinsic apoptotic signaling pathway	GO:2001242	0.00427	0.0152	-1.01	-0.43	12.23	-2.88385	SOD1|16.1436;S100A8|0.2965;S100A9|0.3945;PARK7|5.445	4	158	159	38520	http://www.ebi.ac.uk/QuickGO/GTerm?id=GO:2001242	[]
7	6,7	ribonucleotide metabolic process	GO:0009259	0.00429	0.0153	6.98	0.39	12.23	-2.88385	PGK1|6.0256;ENO1|7.8705;HSPA8|4.3251;TPI1|15.2757;GAPDH|6.0256;ALDOA|1.7378;HSPA1B|4.3652;PARK7|5.445;BPNT1|12.2462	9	755	159	38520	http://www.ebi.ac.uk/QuickGO/GTerm?id=GO:0009259	[]
5	5	collagen catabolic process	GO:0030574	0.00434	0.0154	-3.53	-0.69	12.23	-2.88385	ELANE|0.4246;MMP7|0.0619;KLK6|0.0113	3	79	159	38520	http://www.ebi.ac.uk/QuickGO/GTerm?id=GO:0030574	[]
8	8	cholesterol homeostasis	GO:0042632	0.00434	0.0154	3.3	0.01	12.23	-2.88385	APOA4|15.2757;APOA1|18.8799;FGFR4|6.9823	3	79	159	38520	http://www.ebi.ac.uk/QuickGO/GTerm?id=GO:0042632	[]
5	4,5	regulation of macromolecule metabolic process	GO:0060255	0.00437	0.0155	42.04	3.97	12.23	-2.88385	TF|1.2823;C3|1.4997;FBN1|0.207;ANPEP|12.0226;C4A|0.673;ENPEP|21.0863;SERPINA1|29.3765;SERPINA3|19.2309;PSAP|7.656;A2M|7.5858;EFEMP1|0.0904;APOA4|15.2757;F2|0.1009;SERPINA5|0.2109;CDH1|0.7311;SERPINC1|3.4674;APOA1|18.8799;MME|5.2481;ENO1|7.8705;HSPA8|4.3251;GAPDH|6.0256;CD55|0.2535;HEXB|2.729;ANXA4|3.342;FBLN1|0.1067;CAT|15.417;SOD1|16.1436;PEBP1|6.7298;PRDX1|3.1623;SERPINF1|3.2509;HSPA1B|4.3652;S…	55	9637	159	38520	http://www.ebi.ac.uk/QuickGO/GTerm?id=GO:0060255	[]
6	5,6	S-adenosylmethionine metabolic process	GO:0046500	0.0044	0.0156	1.56	-0.17	12.23	-2.88385	BHMT|13.5519;AHCY|2.6546	2	24	159	38520	http://www.ebi.ac.uk/QuickGO/GTerm?id=GO:0046500	[]
6	6	protein-lipid complex assembly	GO:0065005	0.0044	0.0156	2.46	-0.08	12.23	-2.88385	APOA4|15.2757;APOA1|18.8799	2	24	159	38520	http://www.ebi.ac.uk/QuickGO/GTerm?id=GO:0065005	[]
7	7	fructose metabolic process	GO:0006000	0.0044	0.0156	0.48	-0.28	12.23	-2.88385	ALDOA|1.7378;SORD|1.7219	2	24	159	38520	http://www.ebi.ac.uk/QuickGO/GTerm?id=GO:0006000	[]
8	8	plasminogen activation	GO:0031639	0.0044	0.0156	1.56	-0.17	12.23	-2.88385	APOH|11.9124;FGG|3.0479	2	24	159	38520	http://www.ebi.ac.uk/QuickGO/GTerm?id=GO:0031639	[]
7	6,7	regulation of blood vessel size	GO:0050880	0.00446	0.0158	2.28	-0.09	12.23	-2.88385	HBB|1.6904;SOD1|16.1436;FGG|3.0479;ACE|2.2909	4	160	159	38520	http://www.ebi.ac.uk/QuickGO/GTerm?id=GO:0050880	[]
6	6	alcohol biosynthetic process	GO:0046165	0.00446	0.0158	4.4	0.12	12.23	-2.88385	APOA4|15.2757;APOA1|18.8799;SOD1|16.1436;PARK7|5.445	4	160	159	38520	http://www.ebi.ac.uk/QuickGO/GTerm?id=GO:0046165	[]
8	6,7,8	extrinsic apoptotic signaling pathway	GO:0097191	0.00447	0.0158	3.82	0.06	12.23	-2.88385	HSPA1B|4.3652;PARK7|5.445;GSTP1|11.8032;FGG|3.0479;ACVR1B|0.1294	5	258	159	38520	http://www.ebi.ac.uk/QuickGO/GTerm?id=GO:0097191	[]
7	7	protein phosphorylation	GO:0006468	0.00447	0.0158	16.53	1.36	12.23	-2.88385	TF|1.2823;C3|1.4997;PSAP|7.656;EFEMP1|0.0904;F2|0.1009;APOA1|18.8799;FBLN1|0.1067;SOD1|16.1436;PRDX1|3.1623;PARK7|5.445;GSTP1|11.8032;EPHB4|0.6081;DAG1|3.02;FGG|3.0479;TXN|16.4437;SPINK1|0.5012;ELANE|0.4246;ACE|2.2909;ACVR1B|0.1294;MYLK|0.6427;CPNE3|1.6293;FGFR4|6.9823;CDC42|99.0832	23	3105	159	38520	http://www.ebi.ac.uk/QuickGO/GTerm?id=GO:0006468	[]
5	5	negative regulation of angiogenesis	GO:0016525	0.00449	0.0158	2.24	-0.1	12.23	-2.88385	KLK3|4.4875;APOH|11.9124;SERPINF1|3.2509	3	80	159	38520	http://www.ebi.ac.uk/QuickGO/GTerm?id=GO:0016525	[]
7	7	sterol homeostasis	GO:0055092	0.00449	0.0158	3.3	0.01	12.23	-2.88385	APOA4|15.2757;APOA1|18.8799;FGFR4|6.9823	3	80	159	38520	http://www.ebi.ac.uk/QuickGO/GTerm?id=GO:0055092	[]
5	4,5	positive regulation of catalytic activity	GO:0043085	0.00449	0.0158	17.15	1.43	12.23	-2.88385	TF|1.2823;PSAP|7.656;APOA4|15.2757;APOA1|18.8799;FBLN1|0.1067;SOD1|16.1436;APOH|11.9124;S100A8|0.2965;SH3BGRL3|0.0461;S100A9|0.3945;PARK7|5.445;FABP1|14.3219;TXN|16.4437;ELANE|0.4246;ACE|2.2909;ARHGDIA|31.3329;FGFR4|6.9823;CDC42|99.0832	18	2205	159	38520	http://www.ebi.ac.uk/QuickGO/GTerm?id=GO:0043085	[]
9	5,8,9	positive regulation of sequence-specific DNA binding transcription factor activity	GO:0051091	0.00454	0.0159	0.93	-0.23	12.23	-2.88385	CAT|15.417;HSPA1B|4.3652;S100A8|0.2965;S100A9|0.3945;PARK7|5.445	5	259	159	38520	http://www.ebi.ac.uk/QuickGO/GTerm?id=GO:0051091	[]
5	5	regulation of tube size	GO:0035150	0.00456	0.016	2.28	-0.09	12.23	-2.88385	HBB|1.6904;SOD1|16.1436;FGG|3.0479;ACE|2.2909	4	161	159	38520	http://www.ebi.ac.uk/QuickGO/GTerm?id=GO:0035150	[]
5	5	oligosaccharide metabolic process	GO:0009311	0.00465	0.0163	2.46	-0.08	12.23	-2.88385	MGAM|7.379;GAA|14.4544;HEXB|2.729	3	81	159	38520	http://www.ebi.ac.uk/QuickGO/GTerm?id=GO:0009311	[]
6	6	aspartate family amino acid metabolic process	GO:0009066	0.00465	0.0163	1.95	-0.13	12.23	-2.88385	BHMT|13.5519;ASS1|2.4889;AHCY|2.6546	3	81	159	38520	http://www.ebi.ac.uk/QuickGO/GTerm?id=GO:0009066	[]
3	3	positive regulation of locomotion	GO:0040017	0.00474	0.0166	-3.34	-0.67	12.23	-2.88385	TF|1.2823;FBLN1|0.1067;ACTN4|10.8643;MADCAM1|0.7178;ACVR1B|0.1294;MYLK|0.6427	6	374	159	38520	http://www.ebi.ac.uk/QuickGO/GTerm?id=GO:0040017	[]
11	7,8,9,10,11	negative regulation of extrinsic apoptotic signaling pathway via death domain receptors	GO:1902042	0.00477	0.0166	1.22	-0.2	12.23	-2.88385	PARK7|5.445;FGG|3.0479	2	25	159	38520	http://www.ebi.ac.uk/QuickGO/GTerm?id=GO:1902042	[]
4	4	positive regulation of tissue remodeling	GO:0034105	0.00477	0.0166	0.74	-0.25	12.23	-2.88385	TF|1.2823;SPP1|0.1406	2	25	159	38520	http://www.ebi.ac.uk/QuickGO/GTerm?id=GO:0034105	[]
5	3,4,5	regulation of homeostatic process	GO:0032844	0.0048	0.0167	-4.37	-0.78	12.23	-2.88385	TF|1.2823;SPP1|0.1406;F2|0.1009;ANXA1|0.2089;ACVR1B|0.1294;FGFR4|6.9823	6	375	159	38520	http://www.ebi.ac.uk/QuickGO/GTerm?id=GO:0032844	[]
4	4	reactive nitrogen species metabolic process	GO:2001057	0.00481	0.0167	1.69	-0.16	12.23	-2.88385	HBB|1.6904;ASS1|2.4889;HSP90AA1|11.5878	3	82	159	38520	http://www.ebi.ac.uk/QuickGO/GTerm?id=GO:2001057	[]
9	6,7,8,9	fatty acid transport	GO:0015908	0.00481	0.0167	0.68	-0.26	12.23	-2.88385	ANXA1|0.2089;FABP1|14.3219;ACE|2.2909	3	82	159	38520	http://www.ebi.ac.uk/QuickGO/GTerm?id=GO:0015908	[]
5	5	myeloid leukocyte mediated immunity	GO:0002444	0.00481	0.0167	0.37	-0.29	12.23	-2.88385	C3|1.4997;ELANE|0.4246;ACE|2.2909	3	82	159	38520	http://www.ebi.ac.uk/QuickGO/GTerm?id=GO:0002444	[]
5	5	negative regulation of blood vessel morphogenesis	GO:2000181	0.00481	0.0167	2.24	-0.1	12.23	-2.88385	KLK3|4.4875;APOH|11.9124;SERPINF1|3.2509	3	82	159	38520	http://www.ebi.ac.uk/QuickGO/GTerm?id=GO:2000181	[]
4	4	response to heat	GO:0009408	0.00498	0.0172	3.55	0.04	12.23	-2.88385	HSPA8|4.3251;SOD1|16.1436;HSPA1B|4.3652;HSP90AA1|11.5878	4	165	159	38520	http://www.ebi.ac.uk/QuickGO/GTerm?id=GO:0009408	[]
5	4,5	positive regulation of cytokine production	GO:0001819	0.00512	0.0177	4.21	0.1	12.23	-2.88385	C3|1.4997;HEG1|0.0839;SOD1|16.1436;HSPA1B|4.3652;PARK7|5.445;ELANE|0.4246	6	380	159	38520	http://www.ebi.ac.uk/QuickGO/GTerm?id=GO:0001819	[]
7	4,5,7	plasma lipoprotein particle remodeling	GO:0034369	0.00516	0.0178	2.46	-0.08	12.23	-2.88385	APOA4|15.2757;APOA1|18.8799	2	26	159	38520	http://www.ebi.ac.uk/QuickGO/GTerm?id=GO:0034369	[]
6	6	protein-lipid complex remodeling	GO:0034368	0.00516	0.0178	2.46	-0.08	12.23	-2.88385	APOA4|15.2757;APOA1|18.8799	2	26	159	38520	http://www.ebi.ac.uk/QuickGO/GTerm?id=GO:0034368	[]
5	5	macromolecular complex remodeling	GO:0034367	0.00516	0.0178	2.46	-0.08	12.23	-2.88385	APOA4|15.2757;APOA1|18.8799	2	26	159	38520	http://www.ebi.ac.uk/QuickGO/GTerm?id=GO:0034367	[]
6	6	response to lithium ion	GO:0010226	0.00516	0.0178	-0.7	-0.4	12.23	-2.88385	CDH1|0.7311;IGFBP2|0.2754	2	26	159	38520	http://www.ebi.ac.uk/QuickGO/GTerm?id=GO:0010226	[]
6	6	neutrophil chemotaxis	GO:0030593	0.00532	0.0183	-1.78	-0.51	12.23	-2.88385	SPP1|0.1406;S100A8|0.2965;S100A9|0.3945	3	85	159	38520	http://www.ebi.ac.uk/QuickGO/GTerm?id=GO:0030593	[]
4	4	regulation of cellular localization	GO:0060341	0.00539	0.0185	10.7	0.77	12.23	-2.88385	F2|0.1009;CDH1|0.7311;ANXA1|0.2089;APOA1|18.8799;ANXA4|3.342;FBLN1|0.1067;PPIA|7.5858;PRDX1|3.1623;PARK7|5.445;FGG|3.0479;TXN|16.4437;SPINK1|0.5012;CDC42|99.0832	13	1396	159	38520	http://www.ebi.ac.uk/QuickGO/GTerm?id=GO:0060341	[]
4	4	negative regulation of vasculature development	GO:1901343	0.0055	0.0189	2.24	-0.1	12.23	-2.88385	KLK3|4.4875;APOH|11.9124;SERPINF1|3.2509	3	86	159	38520	http://www.ebi.ac.uk/QuickGO/GTerm?id=GO:1901343	[]
7	6,7	regulation of mitophagy	GO:1903146	0.00553	0.0189	2.64	-0.06	12.23	-2.88385	ANXA5|3.6308;PARK7|5.445;FABP1|14.3219;MYLK|0.6427	4	170	159	38520	http://www.ebi.ac.uk/QuickGO/GTerm?id=GO:1903146	[]
9	6,7,8,9	regulation of extrinsic apoptotic signaling pathway	GO:2001236	0.00553	0.0189	2.93	-0.03	12.23	-2.88385	HSPA1B|4.3652;PARK7|5.445;GSTP1|11.8032;FGG|3.0479	4	170	159	38520	http://www.ebi.ac.uk/QuickGO/GTerm?id=GO:2001236	[]
7	7	glucan catabolic process	GO:0009251	0.00555	0.0189	2.03	-0.12	12.23	-2.88385	MGAM|7.379;GAA|14.4544	2	27	159	38520	http://www.ebi.ac.uk/QuickGO/GTerm?id=GO:0009251	[]
7	7	ribonucleoside catabolic process	GO:0042454	0.00555	0.0189	1.32	-0.19	12.23	-2.88385	AHCY|2.6546;PNP|7.7983	2	27	159	38520	http://www.ebi.ac.uk/QuickGO/GTerm?id=GO:0042454	[]
6	6	neutrophil mediated immunity	GO:0002446	0.00555	0.0189	0.01	-0.33	12.23	-2.88385	ELANE|0.4246;ACE|2.2909	2	27	159	38520	http://www.ebi.ac.uk/QuickGO/GTerm?id=GO:0002446	[]
6	6	superoxide anion generation	GO:0042554	0.00555	0.0189	2.28	-0.09	12.23	-2.88385	SOD1|16.1436;GSTP1|11.8032	2	27	159	38520	http://www.ebi.ac.uk/QuickGO/GTerm?id=GO:0042554	[]
6	5,6	modulation by virus of host morphology or physiology	GO:0019048	0.00555	0.0189	0.49	-0.28	12.23	-2.88385	FBLN1|0.1067;DAG1|3.02	2	27	159	38520	http://www.ebi.ac.uk/QuickGO/GTerm?id=GO:0019048	[]
7	7	positive regulation of B cell mediated immunity	GO:0002714	0.00555	0.0189	0.88	-0.24	12.23	-2.88385	C3|1.4997;PVRL2|0.0887	2	27	159	38520	http://www.ebi.ac.uk/QuickGO/GTerm?id=GO:0002714	[]
9	8,9	positive regulation of immunoglobulin mediated immune response	GO:0002891	0.00555	0.0189	0.88	-0.24	12.23	-2.88385	C3|1.4997;PVRL2|0.0887	2	27	159	38520	http://www.ebi.ac.uk/QuickGO/GTerm?id=GO:0002891	[]
6	6	response to dexamethasone	GO:0071548	0.00555	0.0189	0.91	-0.24	12.23	-2.88385	ASS1|2.4889;SERPINF1|3.2509	2	27	159	38520	http://www.ebi.ac.uk/QuickGO/GTerm?id=GO:0071548	[]
5	5	membrane lipid metabolic process	GO:0006643	0.00557	0.0189	3.61	0.04	12.23	-2.88385	PSAP|7.656;GLB1|2.5119;ARSA|15.8489;HEXB|2.729;ASAH1|4.9204	5	272	159	38520	http://www.ebi.ac.uk/QuickGO/GTerm?id=GO:0006643	[]
5	5	ribose phosphate metabolic process	GO:0019693	0.00559	0.019	6.98	0.39	12.23	-2.88385	PGK1|6.0256;ENO1|7.8705;HSPA8|4.3251;TPI1|15.2757;GAPDH|6.0256;ALDOA|1.7378;HSPA1B|4.3652;PARK7|5.445;BPNT1|12.2462	9	787	159	38520	http://www.ebi.ac.uk/QuickGO/GTerm?id=GO:0019693	[]
6	6	steroid biosynthetic process	GO:0006694	0.00564	0.0191	4.51	0.13	12.23	-2.88385	APOA4|15.2757;APOA1|18.8799;SOD1|16.1436;FGFR4|6.9823	4	171	159	38520	http://www.ebi.ac.uk/QuickGO/GTerm?id=GO:0006694	[]
9	5,7,8,9	positive regulation of peptide secretion	GO:0002793	0.00568	0.0192	-0.48	-0.38	12.23	-2.88385	S100A8|0.2965;S100A9|0.3945;FGG|3.0479	3	87	159	38520	http://www.ebi.ac.uk/QuickGO/GTerm?id=GO:0002793	[]
9	8,9	cellular divalent inorganic cation homeostasis	GO:0072503	0.00579	0.0196	-3.33	-0.67	12.23	-2.88385	F2|0.1009;CD55|0.2535;HEXB|2.729;S100A8|0.2965;S100A9|0.3945;ELANE|0.4246	6	390	159	38520	http://www.ebi.ac.uk/QuickGO/GTerm?id=GO:0072503	[]
8	7,8	positive regulation of T cell proliferation	GO:0042102	0.00586	0.0198	-0.89	-0.42	12.23	-2.88385	CD55|0.2535;IGFBP2|0.2754;PNP|7.7983	3	88	159	38520	http://www.ebi.ac.uk/QuickGO/GTerm?id=GO:0042102	[]
5	5	hemopoiesis	GO:0030097	0.00592	0.02	7.18	0.41	12.23	-2.88385	TF|1.2823;ANXA1|0.2089;SOD1|16.1436;PRG4|0.2831;GLO1|3.1333;PNP|7.7983;ACE|2.2909;ACVR1B|0.1294;CDC42|99.0832	9	794	159	38520	http://www.ebi.ac.uk/QuickGO/GTerm?id=GO:0030097	[]
8	8	myeloid cell apoptotic process	GO:0033028	0.00596	0.0201	-0.4	-0.37	12.23	-2.88385	ANXA1|0.2089;APOH|11.9124	2	28	159	38520	http://www.ebi.ac.uk/QuickGO/GTerm?id=GO:0033028	[]
4	4	cellular response to external stimulus	GO:0071496	0.006	0.0202	6.43	0.33	12.23	-2.88385	ALB|1.2246;F2|0.1009;ANXA5|3.6308;PARK7|5.445;FABP1|14.3219;ARHGDIA|31.3329;MYLK|0.6427;MMP7|0.0619	8	654	159	38520	http://www.ebi.ac.uk/QuickGO/GTerm?id=GO:0071496	[]
5	5	sensory organ morphogenesis	GO:0090596	0.00601	0.0202	-2.13	-0.55	12.23	-2.88385	FBN1|0.207;KRT13|0.278;EFEMP1|0.0904;NAGLU|8.3946;SOD1|16.1436	5	277	159	38520	http://www.ebi.ac.uk/QuickGO/GTerm?id=GO:0090596	[]
6	6	response to tumor necrosis factor	GO:0034612	0.00611	0.0206	3.38	0.02	12.23	-2.88385	APOA1|18.8799;ASS1|2.4889;HSPA1B|4.3652;GSTP1|11.8032	4	175	159	38520	http://www.ebi.ac.uk/QuickGO/GTerm?id=GO:0034612	[]
5	5	macromolecule catabolic process	GO:0009057	0.00613	0.0206	12.73	0.98	12.23	-2.88385	ENPEP|21.0863;MGAM|7.379;GAA|14.4544;NAGLU|8.3946;GLB1|2.5119;GNS|3.8019;HEXB|2.729;PGA3|0.1138;PARK7|5.445;DNASE1|0.1941;FUCA1|12.942;ELANE|0.4246;ACE|2.2909;GUSB|0.7311;UBA1|0.2128;CDC42|99.0832	16	1923	159	38520	http://www.ebi.ac.uk/QuickGO/GTerm?id=GO:0009057	[]
5	5	mononuclear cell proliferation	GO:0032943	0.00628	0.0211	-1.25	-0.46	12.23	-2.88385	CD55|0.2535;IGFBP2|0.2754;PNP|7.7983;SCGB1A1|0.3532;ACE|2.2909	5	280	159	38520	http://www.ebi.ac.uk/QuickGO/GTerm?id=GO:0032943	[]
7	6,7	T cell proliferation	GO:0042098	0.00636	0.0213	-2.5	-0.58	12.23	-2.88385	CD55|0.2535;IGFBP2|0.2754;PNP|7.7983;SCGB1A1|0.3532	4	177	159	38520	http://www.ebi.ac.uk/QuickGO/GTerm?id=GO:0042098	[]
6	6	cellular polysaccharide catabolic process	GO:0044247	0.00639	0.0213	2.03	-0.12	12.23	-2.88385	MGAM|7.379;GAA|14.4544	2	29	159	38520	http://www.ebi.ac.uk/QuickGO/GTerm?id=GO:0044247	[]
5	5	mucosal immune response	GO:0002385	0.00639	0.0213	-1.06	-0.44	12.23	-2.88385	PIGR|0.7586;APOA4|15.2757	2	29	159	38520	http://www.ebi.ac.uk/QuickGO/GTerm?id=GO:0002385	[]
8	7,8	regulation of protein export from nucleus	GO:0046825	0.00639	0.0213	1.95	-0.13	12.23	-2.88385	PARK7|5.445;TXN|16.4437	2	29	159	38520	http://www.ebi.ac.uk/QuickGO/GTerm?id=GO:0046825	[]
6	5,6	negative regulation of cytokine biosynthetic process	GO:0042036	0.00639	0.0213	-0.92	-0.42	12.23	-2.88385	PRG4|0.2831;ELANE|0.4246	2	29	159	38520	http://www.ebi.ac.uk/QuickGO/GTerm?id=GO:0042036	[]
5	4,5	negative regulation of cell proliferation	GO:0008285	0.00643	0.0215	-6.74	-1.02	12.23	-2.88385	IGFBP7|0.0655;FBLN1|0.1067;APOH|11.9124;SERPINF1|3.2509;GSTP1|11.8032;DPT|0.1995;SCGB1A1|0.3532;RARRES1|0.1675	8	662	159	38520	http://www.ebi.ac.uk/QuickGO/GTerm?id=GO:0008285	[]
8	4,7,8	regulation of sequence-specific DNA binding transcription factor activity	GO:0051090	0.00645	0.0215	4.02	0.08	12.23	-2.88385	ANXA4|3.342;CAT|15.417;HSPA1B|4.3652;S100A8|0.2965;S100A9|0.3945;PARK7|5.445	6	399	159	38520	http://www.ebi.ac.uk/QuickGO/GTerm?id=GO:0051090	[]
7	6,7	positive regulation of apoptotic process	GO:0043065	0.00649	0.0216	-2.61	-0.6	12.23	-2.88385	ANXA1|0.2089;CD248|0.5297;SOD1|16.1436;S100A8|0.2965;S100A9|0.3945;ANXA5|3.6308;PARK7|5.445;CDC42|99.0832	8	663	159	38520	http://www.ebi.ac.uk/QuickGO/GTerm?id=GO:0043065	[]
7	7	generation of neurons	GO:0048699	0.00652	0.0217	14.92	1.2	12.23	-2.88385	APOA4|15.2757;SPP1|0.1406;F2|0.1009;CDH1|0.7311;APOA1|18.8799;NAGLU|8.3946;HSPA8|4.3251;SOD1|16.1436;SERPINF1|3.2509;EPHB4|0.6081;HSP90AA1|11.5878;DAG1|3.02;ARHGDIA|31.3329;CDC42|99.0832;KLK6|0.0113	15	1764	159	38520	http://www.ebi.ac.uk/QuickGO/GTerm?id=GO:0048699	[]
8	6,7,8	peptide secretion	GO:0002790	0.00656	0.0218	-3.3	-0.67	12.23	-2.88385	ANXA1|0.2089;S100A8|0.2965;S100A9|0.3945;FGG|3.0479;MMP7|0.0619	5	283	159	38520	http://www.ebi.ac.uk/QuickGO/GTerm?id=GO:0002790	[]
6	6	positive regulation of autophagy	GO:0010508	0.00661	0.0219	2.64	-0.06	12.23	-2.88385	ANXA5|3.6308;PARK7|5.445;FABP1|14.3219;MYLK|0.6427	4	179	159	38520	http://www.ebi.ac.uk/QuickGO/GTerm?id=GO:0010508	[]
6	5,6	positive regulation of programmed cell death	GO:0043068	0.00678	0.0225	-2.61	-0.6	12.23	-2.88385	ANXA1|0.2089;CD248|0.5297;SOD1|16.1436;S100A8|0.2965;S100A9|0.3945;ANXA5|3.6308;PARK7|5.445;CDC42|99.0832	8	668	159	38520	http://www.ebi.ac.uk/QuickGO/GTerm?id=GO:0043068	[]
4	3,4	sexual reproduction	GO:0019953	0.00681	0.0225	7.42	0.43	12.23	-2.88385	GGT1|5.2;SERPINA5|0.2109;HEXB|2.729;SOD1|16.1436;PVRL2|0.0887;PARK7|5.445;SPINK1|0.5012;ACE|2.2909;PLEKHA1|85.5067	9	812	159	38520	http://www.ebi.ac.uk/QuickGO/GTerm?id=GO:0019953	[]
3	3	leukocyte mediated cytotoxicity	GO:0001909	0.00683	0.0225	-0.5	-0.38	12.23	-2.88385	PVRL2|0.0887;PRDX1|3.1623;ELANE|0.4246	3	93	159	38520	http://www.ebi.ac.uk/QuickGO/GTerm?id=GO:0001909	[]
10	8,9,10	positive regulation of peptidyl-serine phosphorylation	GO:0033138	0.00683	0.0225	3.95	0.08	12.23	-2.88385	PARK7|5.445;TXN|16.4437;CDC42|99.0832	3	93	159	38520	http://www.ebi.ac.uk/QuickGO/GTerm?id=GO:0033138	[]
7	6,7	glutathione biosynthetic process	GO:0006750	0.00683	0.0225	1.95	-0.13	12.23	-2.88385	GGT1|5.2;CNDP2|17.0608	2	30	159	38520	http://www.ebi.ac.uk/QuickGO/GTerm?id=GO:0006750	[]
5	4,5	disruption of cells of other organism	GO:0044364	0.00683	0.0225	0.28	-0.3	12.23	-2.88385	ALB|1.2246;ELANE|0.4246	2	30	159	38520	http://www.ebi.ac.uk/QuickGO/GTerm?id=GO:0044364	[]
3	3	killing of cells of other organism	GO:0031640	0.00683	0.0225	0.28	-0.3	12.23	-2.88385	ALB|1.2246;ELANE|0.4246	2	30	159	38520	http://www.ebi.ac.uk/QuickGO/GTerm?id=GO:0031640	[]
6	6	vascular process in circulatory system	GO:0003018	0.00687	0.0226	2.28	-0.09	12.23	-2.88385	HBB|1.6904;SOD1|16.1436;FGG|3.0479;ACE|2.2909	4	181	159	38520	http://www.ebi.ac.uk/QuickGO/GTerm?id=GO:0003018	[]
4	4	cellular component assembly	GO:0022607	0.00692	0.0228	17.61	1.47	12.23	-2.88385	APOA4|15.2757;CDH1|0.7311;APOA1|18.8799;OLFM4|0.2512;HBB|1.6904;FBLN5|0.2249;HEG1|0.0839;CAT|15.417;ALDOA|1.7378;PPIA|7.5858;HBA1|1.6144;PVRL2|0.0887;HSPA1B|4.3652;ACTN4|10.8643;GPX3|15.1356;ANXA5|3.6308;PARK7|5.445;HSP90AA1|11.5878;DAG1|3.02;FGG|3.0479;ACE|2.2909;MYLK|0.6427;FLNC|0.6855;CDC42|99.0832	24	3411	159	38520	http://www.ebi.ac.uk/QuickGO/GTerm?id=GO:0022607	[]
3	3	leukocyte activation	GO:0045321	0.00697	0.0229	-4.77	-0.82	12.23	-2.88385	DPP4|4.7424;ANXA1|0.2089;CD55|0.2535;IGFBP2|0.2754;SOD1|16.1436;PVRL2|0.0887;PNP|7.7983;SCGB1A1|0.3532;CDC42|99.0832	9	815	159	38520	http://www.ebi.ac.uk/QuickGO/GTerm?id=GO:0045321	[]
8	6,8	neuron differentiation	GO:0030182	0.00701	0.023	13.93	1.1	12.23	-2.88385	APOA4|15.2757;SPP1|0.1406;CDH1|0.7311;APOA1|18.8799;NAGLU|8.3946;HSPA8|4.3251;SOD1|16.1436;SERPINF1|3.2509;EPHB4|0.6081;HSP90AA1|11.5878;DAG1|3.02;ARHGDIA|31.3329;CDC42|99.0832;KLK6|0.0113	14	1609	159	38520	http://www.ebi.ac.uk/QuickGO/GTerm?id=GO:0030182	[]
5	5	regulation of oxidoreductase activity	GO:0051341	0.00703	0.023	2.62	-0.06	12.23	-2.88385	HP|6.6069;PARK7|5.445;HSP90AA1|11.5878	3	94	159	38520	http://www.ebi.ac.uk/QuickGO/GTerm?id=GO:0051341	[]
5	5	nucleobase metabolic process	GO:0009112	0.00703	0.023	2.82	-0.04	12.23	-2.88385	ACPP|5.4954;CAT|15.417;PNP|7.7983	3	94	159	38520	http://www.ebi.ac.uk/QuickGO/GTerm?id=GO:0009112	[]
8	5,6,7,8	positive regulation of lymphocyte activation	GO:0051251	0.00705	0.0231	1.16	-0.21	12.23	-2.88385	DPP4|4.7424;CD55|0.2535;IGFBP2|0.2754;PNP|7.7983;CDC42|99.0832	5	288	159	38520	http://www.ebi.ac.uk/QuickGO/GTerm?id=GO:0051251	[]
8	6,7,8	regulation of protein localization to nucleus	GO:1900180	0.00714	0.0233	2.59	-0.06	12.23	-2.88385	CDH1|0.7311;PRDX1|3.1623;PARK7|5.445;TXN|16.4437	4	183	159	38520	http://www.ebi.ac.uk/QuickGO/GTerm?id=GO:1900180	[]
3	3	production of molecular mediator of immune response	GO:0002440	0.00714	0.0233	-0.12	-0.34	12.23	-2.88385	APOA1|18.8799;CD55|0.2535;KLK3|4.4875;MMP7|0.0619	4	183	159	38520	http://www.ebi.ac.uk/QuickGO/GTerm?id=GO:0002440	[]
8	4,5,7,8	negative regulation of secretion by cell	GO:1903531	0.00727	0.0237	-0.15	-0.34	12.23	-2.88385	ANXA1|0.2089;APOA1|18.8799;ANXA4|3.342;FBLN1|0.1067	4	184	159	38520	http://www.ebi.ac.uk/QuickGO/GTerm?id=GO:1903531	[]
6	6	fatty acid biosynthetic process	GO:0006633	0.00727	0.0237	3.86	0.07	12.23	-2.88385	APOA4|15.2757;GGT1|5.2;ANXA1|0.2089;APOA1|18.8799	4	184	159	38520	http://www.ebi.ac.uk/QuickGO/GTerm?id=GO:0006633	[]
6	6	polysaccharide catabolic process	GO:0000272	0.00728	0.0237	2.03	-0.12	12.23	-2.88385	MGAM|7.379;GAA|14.4544	2	31	159	38520	http://www.ebi.ac.uk/QuickGO/GTerm?id=GO:0000272	[]
4	4	organ or tissue specific immune response	GO:0002251	0.00728	0.0237	-1.06	-0.44	12.23	-2.88385	PIGR|0.7586;APOA4|15.2757	2	31	159	38520	http://www.ebi.ac.uk/QuickGO/GTerm?id=GO:0002251	[]
5	5	regulation of epithelial cell proliferation	GO:0050678	0.00736	0.0239	4.62	0.14	12.23	-2.88385	CDH1|0.7311;APOH|11.9124;SERPINF1|3.2509;CDC42|99.0832;ECM1|7.9433	5	291	159	38520	http://www.ebi.ac.uk/QuickGO/GTerm?id=GO:0050678	[]
7	6,7	positive regulation of lipase activity	GO:0060193	0.00745	0.0241	3.54	0.03	12.23	-2.88385	APOA4|15.2757;APOA1|18.8799;APOH|11.9124	3	96	159	38520	http://www.ebi.ac.uk/QuickGO/GTerm?id=GO:0060193	[]
5	5	granulocyte chemotaxis	GO:0071621	0.00745	0.0241	-1.78	-0.51	12.23	-2.88385	SPP1|0.1406;S100A8|0.2965;S100A9|0.3945	3	96	159	38520	http://www.ebi.ac.uk/QuickGO/GTerm?id=GO:0071621	[]
5	5	peripheral nervous system development	GO:0007422	0.00745	0.0241	2.34	-0.09	12.23	-2.88385	SOD1|16.1436;SERPINI1|4.4875;DAG1|3.02	3	96	159	38520	http://www.ebi.ac.uk/QuickGO/GTerm?id=GO:0007422	[]
4	4	cellular response to abiotic stimulus	GO:0071214	0.00746	0.0242	-2.22	-0.55	12.23	-2.88385	F2|0.1009;MME|5.2481;ARHGDIA|31.3329;MYLK|0.6427;MMP7|0.0619	5	292	159	38520	http://www.ebi.ac.uk/QuickGO/GTerm?id=GO:0071214	[]
8	6,7,8	axon development	GO:0061564	0.00751	0.0243	8.02	0.49	12.23	-2.88385	SPP1|0.1406;APOA1|18.8799;HSPA8|4.3251;EPHB4|0.6081;HSP90AA1|11.5878;DAG1|3.02;ARHGDIA|31.3329;CDC42|99.0832	8	680	159	38520	http://www.ebi.ac.uk/QuickGO/GTerm?id=GO:0061564	[]
7	6,7	I-kappaB kinase/NF-kappaB signaling	GO:0007249	0.00756	0.0244	1.13	-0.21	12.23	-2.88385	OLFM4|0.2512;PRDX1|3.1623;GSTP1|11.8032;SHISA5|0.2965;ECM1|7.9433	5	293	159	38520	http://www.ebi.ac.uk/QuickGO/GTerm?id=GO:0007249	[]
8	8	divalent inorganic cation homeostasis	GO:0072507	0.00766	0.0247	-3.33	-0.67	12.23	-2.88385	F2|0.1009;CD55|0.2535;HEXB|2.729;S100A8|0.2965;S100A9|0.3945;ELANE|0.4246	6	414	159	38520	http://www.ebi.ac.uk/QuickGO/GTerm?id=GO:0072507	[]
7	7	acylglycerol homeostasis	GO:0055090	0.00774	0.0248	2.46	-0.08	12.23	-2.88385	APOA4|15.2757;APOA1|18.8799	2	32	159	38520	http://www.ebi.ac.uk/QuickGO/GTerm?id=GO:0055090	[]
8	6,7,8	regulation of oxidative stress-induced intrinsic apoptotic signaling pathway	GO:1902175	0.00774	0.0248	1.94	-0.13	12.23	-2.88385	SOD1|16.1436;PARK7|5.445	2	32	159	38520	http://www.ebi.ac.uk/QuickGO/GTerm?id=GO:1902175	[]
8	8	triglyceride homeostasis	GO:0070328	0.00774	0.0248	2.46	-0.08	12.23	-2.88385	APOA4|15.2757;APOA1|18.8799	2	32	159	38520	http://www.ebi.ac.uk/QuickGO/GTerm?id=GO:0070328	[]
5	5	extracellular matrix assembly	GO:0085029	0.00774	0.0248	0.17	-0.31	12.23	-2.88385	FBLN5|0.2249;DAG1|3.02	2	32	159	38520	http://www.ebi.ac.uk/QuickGO/GTerm?id=GO:0085029	[]
6	5,6	regulation of digestive system process	GO:0044058	0.00774	0.0248	2.46	-0.08	12.23	-2.88385	APOA4|15.2757;APOA1|18.8799	2	32	159	38520	http://www.ebi.ac.uk/QuickGO/GTerm?id=GO:0044058	[]
8	7,8	icosanoid secretion	GO:0032309	0.00774	0.0248	0.32	-0.3	12.23	-2.88385	ANXA1|0.2089;ACE|2.2909	2	32	159	38520	http://www.ebi.ac.uk/QuickGO/GTerm?id=GO:0032309	[]
8	7,8	nonribosomal peptide biosynthetic process	GO:0019184	0.00774	0.0248	1.95	-0.13	12.23	-2.88385	GGT1|5.2;CNDP2|17.0608	2	32	159	38520	http://www.ebi.ac.uk/QuickGO/GTerm?id=GO:0019184	[]
7	7	epidermal cell differentiation	GO:0009913	0.00783	0.0248	-2.38	-0.57	12.23	-2.88385	ANXA1|0.2089;SOD1|16.1436;MADCAM1|0.7178;CDC42|99.0832	4	188	159	38520	http://www.ebi.ac.uk/QuickGO/GTerm?id=GO:0009913	[]
8	7,8	monocarboxylic acid transport	GO:0015718	0.00798	0.0248	2.28	-0.09	12.23	-2.88385	ALB|1.2246;ANXA1|0.2089;FABP1|14.3219;ACE|2.2909	4	189	159	38520	http://www.ebi.ac.uk/QuickGO/GTerm?id=GO:0015718	[]
4	4	lymphocyte activation	GO:0046649	0.00809	0.0248	-2.48	-0.58	12.23	-2.88385	DPP4|4.7424;ANXA1|0.2089;CD55|0.2535;IGFBP2|0.2754;SOD1|16.1436;PNP|7.7983;SCGB1A1|0.3532;CDC42|99.0832	8	689	159	38520	http://www.ebi.ac.uk/QuickGO/GTerm?id=GO:0046649	[]
6	5,6	amide transport	GO:0042886	0.0081	0.0248	-3.8	-0.72	12.23	-2.88385	ANXA1|0.2089;PRDX1|3.1623;S100A8|0.2965;S100A9|0.3945;FGG|3.0479;MMP7|0.0619	6	419	159	38520	http://www.ebi.ac.uk/QuickGO/GTerm?id=GO:0042886	[]
3	3	regulation of reproductive process	GO:2000241	0.0081	0.0248	-0.51	-0.38	12.23	-2.88385	SERPINF1|3.2509;SPINK1|0.5012;ACVR1B|0.1294	3	99	159	38520	http://www.ebi.ac.uk/QuickGO/GTerm?id=GO:2000241	[]
3	3	cytolysis	GO:0019835	0.00822	0.0248	0.18	-0.31	12.23	-2.88385	ALB|1.2246;LYZ|0.5445	2	33	159	38520	http://www.ebi.ac.uk/QuickGO/GTerm?id=GO:0019835	[]
7	4,5,6,7	regulation of bone resorption	GO:0045124	0.00822	0.0248	0.74	-0.25	12.23	-2.88385	TF|1.2823;SPP1|0.1406	2	33	159	38520	http://www.ebi.ac.uk/QuickGO/GTerm?id=GO:0045124	[]
11	8,9,10,11	regulation of TRAIL-activated apoptotic signaling pathway	GO:1903121	0.00824	0.0248	0	-0.33	12.23	-2.88385	PARK7|5.445	1	2	159	38520	http://www.ebi.ac.uk/QuickGO/GTerm?id=GO:1903121	[]
9	7,8,9	type IIa hypersensitivity	GO:0001794	0.00824	0.0248	0	-0.33	12.23	-2.88385	C3|1.4997	1	2	159	38520	http://www.ebi.ac.uk/QuickGO/GTerm?id=GO:0001794	[]
5	5	glyoxylate cycle	GO:0006097	0.00824	0.0248	0	-0.33	12.23	-2.88385	IDH1|2.3335	1	2	159	38520	http://www.ebi.ac.uk/QuickGO/GTerm?id=GO:0006097	[]
5	5	response to bile acid	GO:1903412	0.00824	0.0248	0	-0.33	12.23	-2.88385	FGFR4|6.9823	1	2	159	38520	http://www.ebi.ac.uk/QuickGO/GTerm?id=GO:1903412	[]
10	7,8,9,10	positive regulation of peptidyl-cysteine S-nitrosylation	GO:2000170	0.00824	0.0248	0	-0.33	12.23	-2.88385	ACE|2.2909	1	2	159	38520	http://www.ebi.ac.uk/QuickGO/GTerm?id=GO:2000170	[]
10	8,9,10	regulation of protein K48-linked deubiquitination	GO:1903093	0.00824	0.0248	0	-0.33	12.23	-2.88385	PARK7|5.445	1	2	159	38520	http://www.ebi.ac.uk/QuickGO/GTerm?id=GO:1903093	[]
9	8,9	neuron intrinsic apoptotic signaling pathway in response to hydrogen peroxide	GO:0036482	0.00824	0.0248	0	-0.33	12.23	-2.88385	PARK7|5.445	1	2	159	38520	http://www.ebi.ac.uk/QuickGO/GTerm?id=GO:0036482	[]
7	7	clathrin coat disassembly	GO:0072318	0.00824	0.0248	0	-0.33	12.23	-2.88385	HSPA8|4.3251	1	2	159	38520	http://www.ebi.ac.uk/QuickGO/GTerm?id=GO:0072318	[]
9	4,6,8,9	positive regulation of neutrophil apoptotic process	GO:0033031	0.00824	0.0248	0	-0.33	12.23	-2.88385	ANXA1|0.2089	1	2	159	38520	http://www.ebi.ac.uk/QuickGO/GTerm?id=GO:0033031	[]
9	4,6,8,9	regulation of neutrophil apoptotic process	GO:0033029	0.00824	0.0248	0	-0.33	12.23	-2.88385	ANXA1|0.2089	1	2	159	38520	http://www.ebi.ac.uk/QuickGO/GTerm?id=GO:0033029	[]
7	6,7	sorbitol metabolic process	GO:0006060	0.00824	0.0248	0	-0.33	12.23	-2.88385	SORD|1.7219	1	2	159	38520	http://www.ebi.ac.uk/QuickGO/GTerm?id=GO:0006060	[]
6	6	calcium-dependent cell-matrix adhesion	GO:0016340	0.00824	0.0248	0	-0.33	12.23	-2.88385	DAG1|3.02	1	2	159	38520	http://www.ebi.ac.uk/QuickGO/GTerm?id=GO:0016340	[]
8	6,7,8	regulation of sulfur amino acid metabolic process	GO:0031335	0.00824	0.0248	0	-0.33	12.23	-2.88385	BHMT|13.5519	1	2	159	38520	http://www.ebi.ac.uk/QuickGO/GTerm?id=GO:0031335	[]
6	6	pyridine nucleoside metabolic process	GO:0070637	0.00824	0.0248	0	-0.33	12.23	-2.88385	PNP|7.7983	1	2	159	38520	http://www.ebi.ac.uk/QuickGO/GTerm?id=GO:0070637	[]
10	6,7,8,9,10	collateral sprouting of intact axon in response to injury	GO:0048673	0.00824	0.0248	0	-0.33	12.23	-2.88385	SPP1|0.1406	1	2	159	38520	http://www.ebi.ac.uk/QuickGO/GTerm?id=GO:0048673	[]
6	5,6	positive regulation of hair follicle cell proliferation	GO:0071338	0.00824	0.0248	0	-0.33	12.23	-2.88385	CDC42|99.0832	1	2	159	38520	http://www.ebi.ac.uk/QuickGO/GTerm?id=GO:0071338	[]
9	6,7,8,9	positive regulation of adenosine receptor signaling pathway	GO:0060168	0.00824	0.0248	0	-0.33	12.23	-2.88385	ACPP|5.4954	1	2	159	38520	http://www.ebi.ac.uk/QuickGO/GTerm?id=GO:0060168	[]
8	6,8	regulation of cellular amino acid biosynthetic process	GO:2000282	0.00824	0.0248	0	-0.33	12.23	-2.88385	PARK7|5.445	1	2	159	38520	http://www.ebi.ac.uk/QuickGO/GTerm?id=GO:2000282	[]
7	7	immunoglobulin transcytosis in epithelial cells mediated by polymeric immunoglobulin receptor	GO:0002415	0.00824	0.0248	0	-0.33	12.23	-2.88385	PIGR|0.7586	1	2	159	38520	http://www.ebi.ac.uk/QuickGO/GTerm?id=GO:0002415	[]
7	6,7	negative regulation of complement activation, lectin pathway	GO:0001869	0.00824	0.0248	0	-0.33	12.23	-2.88385	A2M|7.5858	1	2	159	38520	http://www.ebi.ac.uk/QuickGO/GTerm?id=GO:0001869	[]
7	6,7	regulation of homocysteine metabolic process	GO:0050666	0.00824	0.0248	0	-0.33	12.23	-2.88385	BHMT|13.5519	1	2	159	38520	http://www.ebi.ac.uk/QuickGO/GTerm?id=GO:0050666	[]
6	6	sperm mitochondrion organization	GO:0030382	0.00824	0.0248	0	-0.33	12.23	-2.88385	PVRL2|0.0887	1	2	159	38520	http://www.ebi.ac.uk/QuickGO/GTerm?id=GO:0030382	[]
6	6	immune response in mucosal-associated lymphoid tissue	GO:0002386	0.00824	0.0248	0	-0.33	12.23	-2.88385	PIGR|0.7586	1	2	159	38520	http://www.ebi.ac.uk/QuickGO/GTerm?id=GO:0002386	[]
10	9,10	positive regulation of CD4-positive, alpha-beta T cell proliferation	GO:2000563	0.00824	0.0248	0	-0.33	12.23	-2.88385	CD55|0.2535	1	2	159	38520	http://www.ebi.ac.uk/QuickGO/GTerm?id=GO:2000563	[]
7	7	enzyme active site formation	GO:0018307	0.00824	0.0248	0	-0.33	12.23	-2.88385	PARK7|5.445	1	2	159	38520	http://www.ebi.ac.uk/QuickGO/GTerm?id=GO:0018307	[]
8	6,8	neutrophil mediated killing of fungus	GO:0070947	0.00824	0.0248	0	-0.33	12.23	-2.88385	ELANE|0.4246	1	2	159	38520	http://www.ebi.ac.uk/QuickGO/GTerm?id=GO:0070947	[]
8	5,6,7,8	regulation of blood coagulation, intrinsic pathway	GO:2000266	0.00824	0.0248	0	-0.33	12.23	-2.88385	SERPINC1|3.4674	1	2	159	38520	http://www.ebi.ac.uk/QuickGO/GTerm?id=GO:2000266	[]
7	7	pyridine nucleoside catabolic process	GO:0070638	0.00824	0.0248	0	-0.33	12.23	-2.88385	PNP|7.7983	1	2	159	38520	http://www.ebi.ac.uk/QuickGO/GTerm?id=GO:0070638	[]
9	6,7,8,9	positive regulation of phospholipase C-activating G-protein coupled receptor signaling pathway	GO:1900738	0.00824	0.0248	0	-0.33	12.23	-2.88385	F2|0.1009	1	2	159	38520	http://www.ebi.ac.uk/QuickGO/GTerm?id=GO:1900738	[]
7	6,7	regulation of collateral sprouting of intact axon in response to injury	GO:0048683	0.00824	0.0248	0	-0.33	12.23	-2.88385	SPP1|0.1406	1	2	159	38520	http://www.ebi.ac.uk/QuickGO/GTerm?id=GO:0048683	[]
9	8,9	positive regulation of type IIa hypersensitivity	GO:0001798	0.00824	0.0248	0	-0.33	12.23	-2.88385	C3|1.4997	1	2	159	38520	http://www.ebi.ac.uk/QuickGO/GTerm?id=GO:0001798	[]
7	6,7	iron chelate transport	GO:0015688	0.00824	0.0248	0	-0.33	12.23	-2.88385	LCN2|0.2051	1	2	159	38520	http://www.ebi.ac.uk/QuickGO/GTerm?id=GO:0015688	[]
6	6	positive regulation of substrate-dependent cell migration, cell attachment to substrate	GO:1904237	0.00824	0.0248	0	-0.33	12.23	-2.88385	FBLN1|0.1067	1	2	159	38520	http://www.ebi.ac.uk/QuickGO/GTerm?id=GO:1904237	[]
7	6,7	positive regulation of activation of membrane attack complex	GO:0001970	0.00824	0.0248	0	-0.33	12.23	-2.88385	C3|1.4997	1	2	159	38520	http://www.ebi.ac.uk/QuickGO/GTerm?id=GO:0001970	[]
8	8	fructose biosynthetic process	GO:0046370	0.00824	0.0248	0	-0.33	12.23	-2.88385	SORD|1.7219	1	2	159	38520	http://www.ebi.ac.uk/QuickGO/GTerm?id=GO:0046370	[]
8	8	nicotinamide riboside catabolic process	GO:0006738	0.00824	0.0248	0	-0.33	12.23	-2.88385	PNP|7.7983	1	2	159	38520	http://www.ebi.ac.uk/QuickGO/GTerm?id=GO:0006738	[]
8	5,6,8	chylomicron assembly	GO:0034378	0.00824	0.0248	0	-0.33	12.23	-2.88385	APOA4|15.2757	1	2	159	38520	http://www.ebi.ac.uk/QuickGO/GTerm?id=GO:0034378	[]
8	6,7,8	type II hypersensitivity	GO:0002445	0.00824	0.0248	0	-0.33	12.23	-2.88385	C3|1.4997	1	2	159	38520	http://www.ebi.ac.uk/QuickGO/GTerm?id=GO:0002445	[]
8	5,7,8	siderophore transport	GO:0015891	0.00824	0.0248	0	-0.33	12.23	-2.88385	LCN2|0.2051	1	2	159	38520	http://www.ebi.ac.uk/QuickGO/GTerm?id=GO:0015891	[]
11	8,9,10,11	negative regulation of protein K48-linked deubiquitination	GO:1903094	0.00824	0.0248	0	-0.33	12.23	-2.88385	PARK7|5.445	1	2	159	38520	http://www.ebi.ac.uk/QuickGO/GTerm?id=GO:1903094	[]
12	6,7,8,9,10,11,12	positive regulation of mitochondrial electron transport, NADH to ubiquinone	GO:1902958	0.00824	0.0248	0	-0.33	12.23	-2.88385	PARK7|5.445	1	2	159	38520	http://www.ebi.ac.uk/QuickGO/GTerm?id=GO:1902958	[]
9	7,8,9	regulation of type II hypersensitivity	GO:0002892	0.00824	0.0248	0	-0.33	12.23	-2.88385	C3|1.4997	1	2	159	38520	http://www.ebi.ac.uk/QuickGO/GTerm?id=GO:0002892	[]
6	5,6	maintenance of mitochondrion location	GO:0051659	0.00824	0.0248	0	-0.33	12.23	-2.88385	ALB|1.2246	1	2	159	38520	http://www.ebi.ac.uk/QuickGO/GTerm?id=GO:0051659	[]
8	7,8	positive regulation of type II hypersensitivity	GO:0002894	0.00824	0.0248	0	-0.33	12.23	-2.88385	C3|1.4997	1	2	159	38520	http://www.ebi.ac.uk/QuickGO/GTerm?id=GO:0002894	[]
7	6,7	urate biosynthetic process	GO:0034418	0.00824	0.0248	0	-0.33	12.23	-2.88385	PNP|7.7983	1	2	159	38520	http://www.ebi.ac.uk/QuickGO/GTerm?id=GO:0034418	[]
6	5,6	positive regulation of superoxide dismutase activity	GO:1901671	0.00824	0.0248	0	-0.33	12.23	-2.88385	PARK7|5.445	1	2	159	38520	http://www.ebi.ac.uk/QuickGO/GTerm?id=GO:1901671	[]
10	8,9,10	regulation of type IIa hypersensitivity	GO:0001796	0.00824	0.0248	0	-0.33	12.23	-2.88385	C3|1.4997	1	2	159	38520	http://www.ebi.ac.uk/QuickGO/GTerm?id=GO:0001796	[]
7	7	cellular response to insulin-like growth factor stimulus	GO:1990314	0.00824	0.0248	0	-0.33	12.23	-2.88385	FBN1|0.207	1	2	159	38520	http://www.ebi.ac.uk/QuickGO/GTerm?id=GO:1990314	[]
10	8,9,10	negative regulation of hydrogen peroxide-induced neuron intrinsic apoptotic signaling pathway	GO:1903384	0.00824	0.0248	0	-0.33	12.23	-2.88385	PARK7|5.445	1	2	159	38520	http://www.ebi.ac.uk/QuickGO/GTerm?id=GO:1903384	[]
4	4	submandibular salivary gland formation	GO:0060661	0.00824	0.0248	0	-0.33	12.23	-2.88385	CDC42|99.0832	1	2	159	38520	http://www.ebi.ac.uk/QuickGO/GTerm?id=GO:0060661	[]
7	7	nicotinamide riboside metabolic process	GO:0046495	0.00824	0.0248	0	-0.33	12.23	-2.88385	PNP|7.7983	1	2	159	38520	http://www.ebi.ac.uk/QuickGO/GTerm?id=GO:0046495	[]
8	8	DNA rewinding	GO:0036292	0.00824	0.0248	0	-0.33	12.23	-2.88385	ANXA1|0.2089	1	2	159	38520	http://www.ebi.ac.uk/QuickGO/GTerm?id=GO:0036292	[]
9	6,8,9	regulation of complement activation, lectin pathway	GO:0001868	0.00824	0.0248	0	-0.33	12.23	-2.88385	A2M|7.5858	1	2	159	38520	http://www.ebi.ac.uk/QuickGO/GTerm?id=GO:0001868	[]
6	6	regulation of substrate-dependent cell migration, cell attachment to substrate	GO:1904235	0.00824	0.0248	0	-0.33	12.23	-2.88385	FBLN1|0.1067	1	2	159	38520	http://www.ebi.ac.uk/QuickGO/GTerm?id=GO:1904235	[]
5	5	peptidyl-cysteine oxidation	GO:0018171	0.00824	0.0248	0	-0.33	12.23	-2.88385	PARK7|5.445	1	2	159	38520	http://www.ebi.ac.uk/QuickGO/GTerm?id=GO:0018171	[]
10	5,9,10	NADPH regeneration	GO:0006740	0.00824	0.0248	0	-0.33	12.23	-2.88385	IDH1|2.3335	1	2	159	38520	http://www.ebi.ac.uk/QuickGO/GTerm?id=GO:0006740	[]
7	6,7	myoblast migration involved in skeletal muscle regeneration	GO:0014839	0.00824	0.0248	0	-0.33	12.23	-2.88385	ANXA1|0.2089	1	2	159	38520	http://www.ebi.ac.uk/QuickGO/GTerm?id=GO:0014839	[]
8	7,8	negative regulation of ubiquitin-specific protease activity	GO:2000157	0.00824	0.0248	0	-0.33	12.23	-2.88385	PARK7|5.445	1	2	159	38520	http://www.ebi.ac.uk/QuickGO/GTerm?id=GO:2000157	[]
6	5,6	negative regulation of hydrogen peroxide catabolic process	GO:2000296	0.00824	0.0248	0	-0.33	12.23	-2.88385	HP|6.6069	1	2	159	38520	http://www.ebi.ac.uk/QuickGO/GTerm?id=GO:2000296	[]
9	8,9	regulation of hydrogen peroxide-induced neuron intrinsic apoptotic signaling pathway	GO:1903383	0.00824	0.0248	0	-0.33	12.23	-2.88385	PARK7|5.445	1	2	159	38520	http://www.ebi.ac.uk/QuickGO/GTerm?id=GO:1903383	[]
6	6	cellular response to alcohol	GO:0097306	0.00833	0.0251	0.14	-0.31	12.23	-2.88385	CDH1|0.7311;ASS1|2.4889;SERPINF1|3.2509	3	100	159	38520	http://www.ebi.ac.uk/QuickGO/GTerm?id=GO:0097306	[]
8	7,8	protein homooligomerization	GO:0051260	0.00855	0.0257	3.77	0.06	12.23	-2.88385	OLFM4|0.2512;CAT|15.417;ALDOA|1.7378;GPX3|15.1356;ANXA5|3.6308	5	302	159	38520	http://www.ebi.ac.uk/QuickGO/GTerm?id=GO:0051260	[]
6	5,6	positive regulation of inflammatory response	GO:0050729	0.00856	0.0257	-0.18	-0.35	12.23	-2.88385	C3|1.4997;S100A8|0.2965;S100A9|0.3945	3	101	159	38520	http://www.ebi.ac.uk/QuickGO/GTerm?id=GO:0050729	[]
7	6,7	apoptotic cell clearance	GO:0043277	0.00871	0.0261	0	-0.33	12.23	-2.88385	C3|1.4997;C4A|0.673	2	34	159	38520	http://www.ebi.ac.uk/QuickGO/GTerm?id=GO:0043277	[]
8	5,6,7,8	positive regulation of apoptotic signaling pathway	GO:2001235	0.00873	0.0262	-1.01	-0.43	12.23	-2.88385	SOD1|16.1436;S100A8|0.2965;S100A9|0.3945;PARK7|5.445	4	194	159	38520	http://www.ebi.ac.uk/QuickGO/GTerm?id=GO:2001235	[]
7	7	dicarboxylic acid metabolic process	GO:0043648	0.00879	0.0263	1.48	-0.18	12.23	-2.88385	GGT1|5.2;ASS1|2.4889;IDH1|2.3335	3	102	159	38520	http://www.ebi.ac.uk/QuickGO/GTerm?id=GO:0043648	[]
8	6,7,8	regulation of protein secretion	GO:0050708	0.00894	0.0268	4.82	0.16	12.23	-2.88385	ANXA1|0.2089;APOA1|18.8799;ANXA4|3.342;FBLN1|0.1067;PPIA|7.5858;FGG|3.0479	6	428	159	38520	http://www.ebi.ac.uk/QuickGO/GTerm?id=GO:0050708	[]
7	6,7	icosanoid transport	GO:0071715	0.00921	0.0274	0.32	-0.3	12.23	-2.88385	ANXA1|0.2089;ACE|2.2909	2	35	159	38520	http://www.ebi.ac.uk/QuickGO/GTerm?id=GO:0071715	[]
7	7	myelination in peripheral nervous system	GO:0022011	0.00921	0.0274	1.69	-0.16	12.23	-2.88385	SOD1|16.1436;DAG1|3.02	2	35	159	38520	http://www.ebi.ac.uk/QuickGO/GTerm?id=GO:0022011	[]
6	6	salivary gland morphogenesis	GO:0007435	0.00921	0.0274	2.48	-0.07	12.23	-2.88385	DAG1|3.02;CDC42|99.0832	2	35	159	38520	http://www.ebi.ac.uk/QuickGO/GTerm?id=GO:0007435	[]
6	5,6	fatty acid derivative transport	GO:1901571	0.00921	0.0274	0.32	-0.3	12.23	-2.88385	ANXA1|0.2089;ACE|2.2909	2	35	159	38520	http://www.ebi.ac.uk/QuickGO/GTerm?id=GO:1901571	[]
6	6	positive regulation of DNA binding	GO:0043388	0.00921	0.0274	1.95	-0.13	12.23	-2.88385	PARK7|5.445;TXN|16.4437	2	35	159	38520	http://www.ebi.ac.uk/QuickGO/GTerm?id=GO:0043388	[]
6	6	peripheral nervous system axon ensheathment	GO:0032292	0.00921	0.0274	1.69	-0.16	12.23	-2.88385	SOD1|16.1436;DAG1|3.02	2	35	159	38520	http://www.ebi.ac.uk/QuickGO/GTerm?id=GO:0032292	[]
8	5,6,8	negative regulation of endothelial cell migration	GO:0010596	0.00921	0.0274	1.59	-0.17	12.23	-2.88385	APOH|11.9124;SERPINF1|3.2509	2	35	159	38520	http://www.ebi.ac.uk/QuickGO/GTerm?id=GO:0010596	[]
8	5,7,8	regulation of endothelial cell migration	GO:0010594	0.00927	0.0275	1.34	-0.19	12.23	-2.88385	APOH|11.9124;SERPINF1|3.2509;SH3BGRL3|0.0461	3	104	159	38520	http://www.ebi.ac.uk/QuickGO/GTerm?id=GO:0010594	[]
5	5	negative regulation of cell migration	GO:0030336	0.00952	0.0283	3.56	0.04	12.23	-2.88385	APOH|11.9124;SERPINF1|3.2509;DAG1|3.02;ARHGDIA|31.3329	4	199	159	38520	http://www.ebi.ac.uk/QuickGO/GTerm?id=GO:0030336	[]
5	5	organophosphate catabolic process	GO:0046434	0.00968	0.0287	3.29	0.01	12.23	-2.88385	CAT|15.417;IDH1|2.3335;PRDX6|6.9183;PNP|7.7983	4	200	159	38520	http://www.ebi.ac.uk/QuickGO/GTerm?id=GO:0046434	[]
6	4,6	plasma lipoprotein particle organization	GO:0071827	0.00973	0.0288	2.46	-0.08	12.23	-2.88385	APOA4|15.2757;APOA1|18.8799	2	36	159	38520	http://www.ebi.ac.uk/QuickGO/GTerm?id=GO:0071827	[]
5	5	mitochondrion localization	GO:0051646	0.00973	0.0288	0.96	-0.23	12.23	-2.88385	ALB|1.2246;PVRL2|0.0887	2	36	159	38520	http://www.ebi.ac.uk/QuickGO/GTerm?id=GO:0051646	[]
4	4	response to fluid shear stress	GO:0034405	0.00973	0.0288	0.46	-0.28	12.23	-2.88385	SPP1|0.1406;ASS1|2.4889	2	36	159	38520	http://www.ebi.ac.uk/QuickGO/GTerm?id=GO:0034405	[]
8	7,8	regulation of nucleocytoplasmic transport	GO:0046822	0.00985	0.0291	2.59	-0.06	12.23	-2.88385	CDH1|0.7311;PRDX1|3.1623;PARK7|5.445;TXN|16.4437	4	201	159	38520	http://www.ebi.ac.uk/QuickGO/GTerm?id=GO:0046822	[]
5	5	female gonad development	GO:0008585	0.01	0.0295	3.51	0.03	12.23	-2.88385	SOD1|16.1436;IDH1|2.3335;PLEKHA1|85.5067	3	107	159	38520	http://www.ebi.ac.uk/QuickGO/GTerm?id=GO:0008585	[]
5	5	cellular response to heat	GO:0034605	0.01	0.0295	2.34	-0.09	12.23	-2.88385	HSPA8|4.3251;HSPA1B|4.3652;HSP90AA1|11.5878	3	107	159	38520	http://www.ebi.ac.uk/QuickGO/GTerm?id=GO:0034605	[]
11	10,11	cellular iron ion homeostasis	GO:0006879	0.01	0.0295	0.69	-0.26	12.23	-2.88385	TF|1.2823;SOD1|16.1436;LCN2|0.2051	3	107	159	38520	http://www.ebi.ac.uk/QuickGO/GTerm?id=GO:0006879	[]
7	5,6,7	regulation of G-protein coupled receptor protein signaling pathway	GO:0008277	0.0102	0.03	2.03	-0.12	12.23	-2.88385	C3|1.4997;F2|0.1009;ACPP|5.4954;KLK6|0.0113	4	203	159	38520	http://www.ebi.ac.uk/QuickGO/GTerm?id=GO:0008277	[]
7	6,7	embryonic eye morphogenesis	GO:0048048	0.0103	0.0302	-1.73	-0.5	12.23	-2.88385	FBN1|0.207;EFEMP1|0.0904	2	37	159	38520	http://www.ebi.ac.uk/QuickGO/GTerm?id=GO:0048048	[]
5	5	regulation of secretion	GO:0051046	0.0103	0.0304	-3.16	-0.65	12.23	-2.88385	ANXA1|0.2089;APOA1|18.8799;ANXA4|3.342;FBLN1|0.1067;PPIA|7.5858;S100A8|0.2965;S100A9|0.3945;FGG|3.0479;SPINK1|0.5012	9	869	159	38520	http://www.ebi.ac.uk/QuickGO/GTerm?id=GO:0051046	[]
6	6	protein folding	GO:0006457	0.0104	0.0304	4.96	0.18	12.23	-2.88385	HSPA8|4.3251;PPIA|7.5858;HSPA1B|4.3652;HSP90AA1|11.5878;TXN|16.4437;PPIC|3.342	6	442	159	38520	http://www.ebi.ac.uk/QuickGO/GTerm?id=GO:0006457	[]
7	5,6,7	regulation of macroautophagy	GO:0016241	0.0105	0.0308	2.64	-0.06	12.23	-2.88385	ANXA5|3.6308;PARK7|5.445;FABP1|14.3219;MYLK|0.6427	4	205	159	38520	http://www.ebi.ac.uk/QuickGO/GTerm?id=GO:0016241	[]
7	6,7	regulation of lymphocyte proliferation	GO:0050670	0.0105	0.0308	-2.5	-0.58	12.23	-2.88385	CD55|0.2535;IGFBP2|0.2754;PNP|7.7983;SCGB1A1|0.3532	4	205	159	38520	http://www.ebi.ac.uk/QuickGO/GTerm?id=GO:0050670	[]
7	4,6,7	negative regulation of secretion	GO:0051048	0.0105	0.0308	-0.15	-0.34	12.23	-2.88385	ANXA1|0.2089;APOA1|18.8799;ANXA4|3.342;FBLN1|0.1067	4	205	159	38520	http://www.ebi.ac.uk/QuickGO/GTerm?id=GO:0051048	[]
7	7	heart contraction	GO:0060047	0.0105	0.0308	4.72	0.16	12.23	-2.88385	GAA|14.4544;SOD1|16.1436;ACE|2.2909;CDC42|99.0832	4	205	159	38520	http://www.ebi.ac.uk/QuickGO/GTerm?id=GO:0060047	[]
6	6	regulation of mononuclear cell proliferation	GO:0032944	0.0107	0.0313	-2.5	-0.58	12.23	-2.88385	CD55|0.2535;IGFBP2|0.2754;PNP|7.7983;SCGB1A1|0.3532	4	206	159	38520	http://www.ebi.ac.uk/QuickGO/GTerm?id=GO:0032944	[]
5	4,5	viral process	GO:0016032	0.0108	0.0314	7.01	0.39	12.23	-2.88385	ANPEP|12.0226;DPP4|4.7424;HSPA8|4.3251;CD55|0.2535;FBLN1|0.1067;PPIA|7.5858;PVRL2|0.0887;HSPA1B|4.3652;DAG1|3.02	9	875	159	38520	http://www.ebi.ac.uk/QuickGO/GTerm?id=GO:0016032	[]
9	8,9	phosphatidylinositol 3-kinase signaling	GO:0014065	0.0108	0.0314	1	-0.23	12.23	-2.88385	F2|0.1009;CAT|15.417;PLEKHA1|85.5067	3	110	159	38520	http://www.ebi.ac.uk/QuickGO/GTerm?id=GO:0014065	[]
5	5	response to retinoic acid	GO:0032526	0.0108	0.0314	-0.51	-0.38	12.23	-2.88385	KRT13|0.278;IGFBP2|0.2754;SERPINF1|3.2509	3	110	159	38520	http://www.ebi.ac.uk/QuickGO/GTerm?id=GO:0032526	[]
6	5,6	regulation of gastrulation	GO:0010470	0.0108	0.0314	1.76	-0.15	12.23	-2.88385	APOA1|18.8799;DAG1|3.02	2	38	159	38520	http://www.ebi.ac.uk/QuickGO/GTerm?id=GO:0010470	[]
6	5,6	regulation of bone remodeling	GO:0046850	0.0108	0.0314	0.74	-0.25	12.23	-2.88385	TF|1.2823;SPP1|0.1406	2	38	159	38520	http://www.ebi.ac.uk/QuickGO/GTerm?id=GO:0046850	[]
7	5,6,7	protein secretion	GO:0009306	0.0108	0.0315	5.71	0.26	12.23	-2.88385	ANXA1|0.2089;APOA1|18.8799;ANXA4|3.342;FBLN1|0.1067;PPIA|7.5858;FGG|3.0479;PNP|7.7983	7	582	159	38520	http://www.ebi.ac.uk/QuickGO/GTerm?id=GO:0009306	[]
6	6	heart process	GO:0003015	0.0109	0.0316	4.72	0.16	12.23	-2.88385	GAA|14.4544;SOD1|16.1436;ACE|2.2909;CDC42|99.0832	4	207	159	38520	http://www.ebi.ac.uk/QuickGO/GTerm?id=GO:0003015	[]
5	4,5	sequestering of metal ion	GO:0051238	0.0111	0.0321	-1.93	-0.53	12.23	-2.88385	F2|0.1009;S100A8|0.2965;S100A9|0.3945	3	111	159	38520	http://www.ebi.ac.uk/QuickGO/GTerm?id=GO:0051238	[]
6	6	response to calcium ion	GO:0051592	0.0111	0.0321	1.26	-0.2	12.23	-2.88385	ANXA5|3.6308;FGG|3.0479;CPNE3|1.6293	3	111	159	38520	http://www.ebi.ac.uk/QuickGO/GTerm?id=GO:0051592	[]
5	5	fatty acid metabolic process	GO:0006631	0.0112	0.0326	5.19	0.2	12.23	-2.88385	C3|1.4997;APOA4|15.2757;GGT1|5.2;ANXA1|0.2089;APOA1|18.8799;FABP1|14.3219	6	450	159	38520	http://www.ebi.ac.uk/QuickGO/GTerm?id=GO:0006631	[]
6	6	cell-cell junction assembly	GO:0007043	0.0113	0.0326	1.08	-0.22	12.23	-2.88385	HEG1|0.0839;ACTN4|10.8643;ACE|2.2909	3	112	159	38520	http://www.ebi.ac.uk/QuickGO/GTerm?id=GO:0007043	[]
6	6	alpha-beta T cell activation	GO:0046631	0.0113	0.0326	-0.89	-0.42	12.23	-2.88385	ANXA1|0.2089;CD55|0.2535;PNP|7.7983	3	112	159	38520	http://www.ebi.ac.uk/QuickGO/GTerm?id=GO:0046631	[]
5	4,5	negative regulation of immune effector process	GO:0002698	0.0113	0.0326	0.6	-0.27	12.23	-2.88385	A2M|7.5858;APOA1|18.8799;CD55|0.2535	3	112	159	38520	http://www.ebi.ac.uk/QuickGO/GTerm?id=GO:0002698	[]
7	6,7	nucleoside catabolic process	GO:0009164	0.0114	0.0326	1.32	-0.19	12.23	-2.88385	AHCY|2.6546;PNP|7.7983	2	39	159	38520	http://www.ebi.ac.uk/QuickGO/GTerm?id=GO:0009164	[]
6	6	regulation of sterol transport	GO:0032371	0.0114	0.0326	2.46	-0.08	12.23	-2.88385	APOA4|15.2757;APOA1|18.8799	2	39	159	38520	http://www.ebi.ac.uk/QuickGO/GTerm?id=GO:0032371	[]
7	7	regulation of cholesterol transport	GO:0032374	0.0114	0.0326	2.46	-0.08	12.23	-2.88385	APOA4|15.2757;APOA1|18.8799	2	39	159	38520	http://www.ebi.ac.uk/QuickGO/GTerm?id=GO:0032374	[]
5	5	protein-lipid complex subunit organization	GO:0071825	0.0114	0.0326	2.46	-0.08	12.23	-2.88385	APOA4|15.2757;APOA1|18.8799	2	39	159	38520	http://www.ebi.ac.uk/QuickGO/GTerm?id=GO:0071825	[]
8	6,7,8	Schwann cell development	GO:0014044	0.0114	0.0326	1.69	-0.16	12.23	-2.88385	SOD1|16.1436;DAG1|3.02	2	39	159	38520	http://www.ebi.ac.uk/QuickGO/GTerm?id=GO:0014044	[]
5	5	salivary gland development	GO:0007431	0.0114	0.0326	2.48	-0.07	12.23	-2.88385	DAG1|3.02;CDC42|99.0832	2	39	159	38520	http://www.ebi.ac.uk/QuickGO/GTerm?id=GO:0007431	[]
6	6	phospholipid catabolic process	GO:0009395	0.0114	0.0326	1.21	-0.2	12.23	-2.88385	IDH1|2.3335;PRDX6|6.9183	2	39	159	38520	http://www.ebi.ac.uk/QuickGO/GTerm?id=GO:0009395	[]
5	5	central nervous system development	GO:0007417	0.0114	0.0326	-0.8	-0.41	12.23	-2.88385	LRP2|0.4365;F2|0.1009;CDH1|0.7311;NAGLU|8.3946;GSTP1|11.8032;SERPINI1|4.4875;CKB|3.0761;ACVR1B|0.1294;CDC42|99.0832;KLK6|0.0113	10	1039	159	38520	http://www.ebi.ac.uk/QuickGO/GTerm?id=GO:0007417	[]
10	6,7,8,10	positive regulation of defense response to virus by host	GO:0002230	0.0116	0.0331	0.19	-0.31	12.23	-2.88385	ANXA5|3.6308;FABP1|14.3219;MYLK|0.6427	3	113	159	38520	http://www.ebi.ac.uk/QuickGO/GTerm?id=GO:0002230	[]
8	7,8	protein tetramerization	GO:0051262	0.0119	0.0331	2.61	-0.06	12.23	-2.88385	CAT|15.417;ALDOA|1.7378;GPX3|15.1356	3	114	159	38520	http://www.ebi.ac.uk/QuickGO/GTerm?id=GO:0051262	[]
5	5	endothelial cell proliferation	GO:0001935	0.0119	0.0331	3.25	0	12.23	-2.88385	APOA1|18.8799;APOH|11.9124;ECM1|7.9433	3	114	159	38520	http://www.ebi.ac.uk/QuickGO/GTerm?id=GO:0001935	[]
8	6,7,8	negative regulation of protein kinase B signaling	GO:0051898	0.0119	0.0331	2.41	-0.08	12.23	-2.88385	DAG1|3.02;PLEKHA1|85.5067	2	40	159	38520	http://www.ebi.ac.uk/QuickGO/GTerm?id=GO:0051898	[]
7	7	arginine metabolic process	GO:0006525	0.0119	0.0331	1.13	-0.21	12.23	-2.88385	ASS1|2.4889;FAH|5.445	2	40	159	38520	http://www.ebi.ac.uk/QuickGO/GTerm?id=GO:0006525	[]
6	6	fat-soluble vitamin metabolic process	GO:0006775	0.0119	0.0331	-0.8	-0.41	12.23	-2.88385	LRP2|0.4365;CUBN|0.3597	2	40	159	38520	http://www.ebi.ac.uk/QuickGO/GTerm?id=GO:0006775	[]
10	8,9,10	regulation of endothelial cell apoptotic process	GO:2000351	0.0119	0.0331	-0.21	-0.35	12.23	-2.88385	CD248|0.5297;FGG|3.0479	2	40	159	38520	http://www.ebi.ac.uk/QuickGO/GTerm?id=GO:2000351	[]
8	5,6,8	antibacterial humoral response	GO:0019731	0.0119	0.0331	0.56	-0.27	12.23	-2.88385	KLK3|4.4875;MMP7|0.0619	2	40	159	38520	http://www.ebi.ac.uk/QuickGO/GTerm?id=GO:0019731	[]
7	6,7	intrinsic apoptotic signaling pathway	GO:0097193	0.0121	0.0331	-1.94	-0.53	12.23	-2.88385	SOD1|16.1436;S100A8|0.2965;S100A9|0.3945;PARK7|5.445;SHISA5|0.2965	5	329	159	38520	http://www.ebi.ac.uk/QuickGO/GTerm?id=GO:0097193	[]
6	6	lipid homeostasis	GO:0055088	0.0122	0.0331	3.3	0.01	12.23	-2.88385	APOA4|15.2757;APOA1|18.8799;FGFR4|6.9823	3	115	159	38520	http://www.ebi.ac.uk/QuickGO/GTerm?id=GO:0055088	[]
10	6,7,9,10	hemolysis by symbiont of host erythrocytes	GO:0019836	0.0123	0.0331	0	-0.33	12.23	-2.88385	ALB|1.2246	1	3	159	38520	http://www.ebi.ac.uk/QuickGO/GTerm?id=GO:0019836	[]
9	7,8,9	fusion of virus membrane with host plasma membrane	GO:0019064	0.0123	0.0331	0	-0.33	12.23	-2.88385	PVRL2|0.0887	1	3	159	38520	http://www.ebi.ac.uk/QuickGO/GTerm?id=GO:0019064	[]
8	6,7,8	negative regulation of nitric oxide mediated signal transduction	GO:0010751	0.0123	0.0331	0	-0.33	12.23	-2.88385	SPINK1|0.5012	1	3	159	38520	http://www.ebi.ac.uk/QuickGO/GTerm?id=GO:0010751	[]
7	5,6,7	regulation of hydrogen peroxide catabolic process	GO:2000295	0.0123	0.0331	0	-0.33	12.23	-2.88385	HP|6.6069	1	3	159	38520	http://www.ebi.ac.uk/QuickGO/GTerm?id=GO:2000295	[]
7	7	regulation of ubiquitin-specific protease activity	GO:2000152	0.0123	0.0331	0	-0.33	12.23	-2.88385	PARK7|5.445	1	3	159	38520	http://www.ebi.ac.uk/QuickGO/GTerm?id=GO:2000152	[]
8	6,7,8	membrane fusion involved in viral entry into host cell	GO:0039663	0.0123	0.0331	0	-0.33	12.23	-2.88385	PVRL2|0.0887	1	3	159	38520	http://www.ebi.ac.uk/QuickGO/GTerm?id=GO:0039663	[]
9	8,9	CD4-positive, alpha-beta T cell proliferation	GO:0035739	0.0123	0.0331	0	-0.33	12.23	-2.88385	CD55|0.2535	1	3	159	38520	http://www.ebi.ac.uk/QuickGO/GTerm?id=GO:0035739	[]
6	5,6	multi-organism membrane fusion	GO:0044800	0.0123	0.0331	0	-0.33	12.23	-2.88385	PVRL2|0.0887	1	3	159	38520	http://www.ebi.ac.uk/QuickGO/GTerm?id=GO:0044800	[]
9	9	regulation of renal output by angiotensin	GO:0002019	0.0123	0.0331	0	-0.33	12.23	-2.88385	ACE|2.2909	1	3	159	38520	http://www.ebi.ac.uk/QuickGO/GTerm?id=GO:0002019	[]
7	7	glycolate metabolic process	GO:0009441	0.0123	0.0331	0	-0.33	12.23	-2.88385	PARK7|5.445	1	3	159	38520	http://www.ebi.ac.uk/QuickGO/GTerm?id=GO:0009441	[]
6	6	multicellular organismal lipid catabolic process	GO:0044240	0.0123	0.0331	0	-0.33	12.23	-2.88385	APOA4|15.2757	1	3	159	38520	http://www.ebi.ac.uk/QuickGO/GTerm?id=GO:0044240	[]
7	6,7	regulation of oxidative phosphorylation uncoupler activity	GO:2000275	0.0123	0.0331	0	-0.33	12.23	-2.88385	PARK7|5.445	1	3	159	38520	http://www.ebi.ac.uk/QuickGO/GTerm?id=GO:2000275	[]
6	6	transforming growth factor-beta secretion	GO:0038044	0.0123	0.0331	0	-0.33	12.23	-2.88385	FBLN1|0.1067	1	3	159	38520	http://www.ebi.ac.uk/QuickGO/GTerm?id=GO:0038044	[]
9	6,7,8,9	negative regulation of chemokine biosynthetic process	GO:0045079	0.0123	0.0331	0	-0.33	12.23	-2.88385	ELANE|0.4246	1	3	159	38520	http://www.ebi.ac.uk/QuickGO/GTerm?id=GO:0045079	[]
4	4	positive regulation of protein activation cascade	GO:2000259	0.0123	0.0331	0	-0.33	12.23	-2.88385	C3|1.4997	1	3	159	38520	http://www.ebi.ac.uk/QuickGO/GTerm?id=GO:2000259	[]
11	6,7,8,9,10,11	positive regulation of oxidative phosphorylation	GO:1903862	0.0123	0.0331	0	-0.33	12.23	-2.88385	PARK7|5.445	1	3	159	38520	http://www.ebi.ac.uk/QuickGO/GTerm?id=GO:1903862	[]
9	7,9	regulation of plasma lipoprotein particle oxidation	GO:0034444	0.0123	0.0331	0	-0.33	12.23	-2.88385	APOA4|15.2757	1	3	159	38520	http://www.ebi.ac.uk/QuickGO/GTerm?id=GO:0034444	[]
9	6,7,9	chylomicron remodeling	GO:0034371	0.0123	0.0331	0	-0.33	12.23	-2.88385	APOA4|15.2757	1	3	159	38520	http://www.ebi.ac.uk/QuickGO/GTerm?id=GO:0034371	[]
4	4	negative regulation of very-low-density lipoprotein particle remodeling	GO:0010903	0.0123	0.0331	0	-0.33	12.23	-2.88385	APOA1|18.8799	1	3	159	38520	http://www.ebi.ac.uk/QuickGO/GTerm?id=GO:0010903	[]
8	6,7,8	negative regulation of transforming growth factor-beta secretion	GO:2001202	0.0123	0.0331	0	-0.33	12.23	-2.88385	FBLN1|0.1067	1	3	159	38520	http://www.ebi.ac.uk/QuickGO/GTerm?id=GO:2001202	[]
9	7,8,9	negative regulation of intrinsic apoptotic signaling pathway in response to hydrogen peroxide	GO:1903751	0.0123	0.0331	0	-0.33	12.23	-2.88385	PARK7|5.445	1	3	159	38520	http://www.ebi.ac.uk/QuickGO/GTerm?id=GO:1903751	[]
9	5,6,9	susceptibility to T cell mediated cytotoxicity	GO:0060370	0.0123	0.0331	0	-0.33	12.23	-2.88385	PVRL2|0.0887	1	3	159	38520	http://www.ebi.ac.uk/QuickGO/GTerm?id=GO:0060370	[]
9	8,9	negative regulation of phospholipase A2 activity	GO:1900138	0.0123	0.0331	0	-0.33	12.23	-2.88385	ANXA1|0.2089	1	3	159	38520	http://www.ebi.ac.uk/QuickGO/GTerm?id=GO:1900138	[]
6	5,6	nitric oxide transport	GO:0030185	0.0123	0.0331	0	-0.33	12.23	-2.88385	HBB|1.6904	1	3	159	38520	http://www.ebi.ac.uk/QuickGO/GTerm?id=GO:0030185	[]
5	5	response to antipsychotic drug	GO:0097332	0.0123	0.0331	0	-0.33	12.23	-2.88385	SOD1|16.1436	1	3	159	38520	http://www.ebi.ac.uk/QuickGO/GTerm?id=GO:0097332	[]
7	6,7	acylglycerol transport	GO:0034196	0.0123	0.0331	0	-0.33	12.23	-2.88385	APOH|11.9124	1	3	159	38520	http://www.ebi.ac.uk/QuickGO/GTerm?id=GO:0034196	[]
5	5	amino-acid betaine catabolic process	GO:0006579	0.0123	0.0331	0	-0.33	12.23	-2.88385	BHMT|13.5519	1	3	159	38520	http://www.ebi.ac.uk/QuickGO/GTerm?id=GO:0006579	[]
8	6,7,8	regulation of phospholipase C-activating G-protein coupled receptor signaling pathway	GO:1900736	0.0123	0.0331	0	-0.33	12.23	-2.88385	F2|0.1009	1	3	159	38520	http://www.ebi.ac.uk/QuickGO/GTerm?id=GO:1900736	[]
9	5,6,7,8,9	regulation of androgen receptor activity	GO:2000823	0.0123	0.0331	0	-0.33	12.23	-2.88385	PARK7|5.445	1	3	159	38520	http://www.ebi.ac.uk/QuickGO/GTerm?id=GO:2000823	[]
7	6,7	aorta smooth muscle tissue morphogenesis	GO:0060414	0.0123	0.0331	0	-0.33	12.23	-2.88385	MYLK|0.6427	1	3	159	38520	http://www.ebi.ac.uk/QuickGO/GTerm?id=GO:0060414	[]
6	5,6	detoxification of copper ion	GO:0010273	0.0123	0.0331	0	-0.33	12.23	-2.88385	PARK7|5.445	1	3	159	38520	http://www.ebi.ac.uk/QuickGO/GTerm?id=GO:0010273	[]
7	7	cellular response to oleic acid	GO:0071400	0.0123	0.0331	0	-0.33	12.23	-2.88385	ASS1|2.4889	1	3	159	38520	http://www.ebi.ac.uk/QuickGO/GTerm?id=GO:0071400	[]
5	5	cytolysis in other organism involved in symbiotic interaction	GO:0051801	0.0123	0.0331	0	-0.33	12.23	-2.88385	ALB|1.2246	1	3	159	38520	http://www.ebi.ac.uk/QuickGO/GTerm?id=GO:0051801	[]
8	6,7,8	regulation of adenosine receptor signaling pathway	GO:0060167	0.0123	0.0331	0	-0.33	12.23	-2.88385	ACPP|5.4954	1	3	159	38520	http://www.ebi.ac.uk/QuickGO/GTerm?id=GO:0060167	[]
9	7,8,9	regulation of intrinsic apoptotic signaling pathway in response to hydrogen peroxide	GO:1903750	0.0123	0.0331	0	-0.33	12.23	-2.88385	PARK7|5.445	1	3	159	38520	http://www.ebi.ac.uk/QuickGO/GTerm?id=GO:1903750	[]
8	6,8	regulation of neutrophil extravasation	GO:2000389	0.0123	0.0331	0	-0.33	12.23	-2.88385	OLFM4|0.2512	1	3	159	38520	http://www.ebi.ac.uk/QuickGO/GTerm?id=GO:2000389	[]
5	5	stress response to copper ion	GO:1990169	0.0123	0.0331	0	-0.33	12.23	-2.88385	PARK7|5.445	1	3	159	38520	http://www.ebi.ac.uk/QuickGO/GTerm?id=GO:1990169	[]
7	7	nitric oxide homeostasis	GO:0033484	0.0123	0.0331	0	-0.33	12.23	-2.88385	GSTP1|11.8032	1	3	159	38520	http://www.ebi.ac.uk/QuickGO/GTerm?id=GO:0033484	[]
9	7,9	negative regulation of plasma lipoprotein particle oxidation	GO:0034445	0.0123	0.0331	0	-0.33	12.23	-2.88385	APOA4|15.2757	1	3	159	38520	http://www.ebi.ac.uk/QuickGO/GTerm?id=GO:0034445	[]
9	7,8,9	negative regulation of hydrogen peroxide-induced neuron death	GO:1903208	0.0123	0.0331	0	-0.33	12.23	-2.88385	PARK7|5.445	1	3	159	38520	http://www.ebi.ac.uk/QuickGO/GTerm?id=GO:1903208	[]
10	6,8,10	diaphragm contraction	GO:0002086	0.0123	0.0331	0	-0.33	12.23	-2.88385	GAA|14.4544	1	3	159	38520	http://www.ebi.ac.uk/QuickGO/GTerm?id=GO:0002086	[]
4	4	cell proliferation in bone marrow	GO:0071838	0.0123	0.0331	0	-0.33	12.23	-2.88385	ACE|2.2909	1	3	159	38520	http://www.ebi.ac.uk/QuickGO/GTerm?id=GO:0071838	[]
7	6,7	negative regulation of monocyte chemotactic protein-1 production	GO:0071638	0.0123	0.0331	0	-0.33	12.23	-2.88385	GSTP1|11.8032	1	3	159	38520	http://www.ebi.ac.uk/QuickGO/GTerm?id=GO:0071638	[]
5	5	hemolysis in other organism	GO:0044179	0.0123	0.0331	0	-0.33	12.23	-2.88385	ALB|1.2246	1	3	159	38520	http://www.ebi.ac.uk/QuickGO/GTerm?id=GO:0044179	[]
6	6	courtship behavior	GO:0007619	0.0123	0.0331	0	-0.33	12.23	-2.88385	HEXB|2.729	1	3	159	38520	http://www.ebi.ac.uk/QuickGO/GTerm?id=GO:0007619	[]
7	6,7	regulation of transforming growth factor-beta secretion	GO:2001201	0.0123	0.0331	0	-0.33	12.23	-2.88385	FBLN1|0.1067	1	3	159	38520	http://www.ebi.ac.uk/QuickGO/GTerm?id=GO:2001201	[]
10	5,6,9,10	positive regulation of nucleotide-binding oligomerization domain containing 2 signaling pathway	GO:0070434	0.0123	0.0331	0	-0.33	12.23	-2.88385	HSPA1B|4.3652	1	3	159	38520	http://www.ebi.ac.uk/QuickGO/GTerm?id=GO:0070434	[]
9	6,8,9	cytolysis by symbiont of host cells	GO:0001897	0.0123	0.0331	0	-0.33	12.23	-2.88385	ALB|1.2246	1	3	159	38520	http://www.ebi.ac.uk/QuickGO/GTerm?id=GO:0001897	[]
5	5	positive regulation of complement activation	GO:0045917	0.0123	0.0331	0	-0.33	12.23	-2.88385	C3|1.4997	1	3	159	38520	http://www.ebi.ac.uk/QuickGO/GTerm?id=GO:0045917	[]
8	7,8	regulation of hydrogen peroxide-induced neuron death	GO:1903207	0.0123	0.0331	0	-0.33	12.23	-2.88385	PARK7|5.445	1	3	159	38520	http://www.ebi.ac.uk/QuickGO/GTerm?id=GO:1903207	[]
5	5	hemolysis in other organism involved in symbiotic interaction	GO:0052331	0.0123	0.0331	0	-0.33	12.23	-2.88385	ALB|1.2246	1	3	159	38520	http://www.ebi.ac.uk/QuickGO/GTerm?id=GO:0052331	[]
6	5,6	hexitol metabolic process	GO:0006059	0.0123	0.0331	0	-0.33	12.23	-2.88385	SORD|1.7219	1	3	159	38520	http://www.ebi.ac.uk/QuickGO/GTerm?id=GO:0006059	[]
8	7,8	neuron death in response to hydrogen peroxide	GO:0036476	0.0123	0.0331	0	-0.33	12.23	-2.88385	PARK7|5.445	1	3	159	38520	http://www.ebi.ac.uk/QuickGO/GTerm?id=GO:0036476	[]
6	6	regulation of superoxide dismutase activity	GO:1901668	0.0123	0.0331	0	-0.33	12.23	-2.88385	PARK7|5.445	1	3	159	38520	http://www.ebi.ac.uk/QuickGO/GTerm?id=GO:1901668	[]
10	9,10	regulation of CD4-positive, alpha-beta T cell proliferation	GO:2000561	0.0123	0.0331	0	-0.33	12.23	-2.88385	CD55|0.2535	1	3	159	38520	http://www.ebi.ac.uk/QuickGO/GTerm?id=GO:2000561	[]
4	4	cytolysis in other organism	GO:0051715	0.0123	0.0331	0	-0.33	12.23	-2.88385	ALB|1.2246	1	3	159	38520	http://www.ebi.ac.uk/QuickGO/GTerm?id=GO:0051715	[]
5	5	regulation of hair follicle cell proliferation	GO:0071336	0.0123	0.0331	0	-0.33	12.23	-2.88385	CDC42|99.0832	1	3	159	38520	http://www.ebi.ac.uk/QuickGO/GTerm?id=GO:0071336	[]
8	8	cellular response to UV-A	GO:0071492	0.0123	0.0331	0	-0.33	12.23	-2.88385	MME|5.2481	1	3	159	38520	http://www.ebi.ac.uk/QuickGO/GTerm?id=GO:0071492	[]
7	7	actin filament branching	GO:0090135	0.0123	0.0331	0	-0.33	12.23	-2.88385	CDC42|99.0832	1	3	159	38520	http://www.ebi.ac.uk/QuickGO/GTerm?id=GO:0090135	[]
8	5,7,8	antimicrobial peptide biosynthetic process	GO:0002777	0.0123	0.0331	0	-0.33	12.23	-2.88385	MMP7|0.0619	1	3	159	38520	http://www.ebi.ac.uk/QuickGO/GTerm?id=GO:0002777	[]
11	6,7,8,10,11	sequestering of BMP in extracellular matrix	GO:0035582	0.0123	0.0331	0	-0.33	12.23	-2.88385	FBN1|0.207	1	3	159	38520	http://www.ebi.ac.uk/QuickGO/GTerm?id=GO:0035582	[]
7	7	cellular response to cobalt ion	GO:0071279	0.0123	0.0331	0	-0.33	12.23	-2.88385	SERPINF1|3.2509	1	3	159	38520	http://www.ebi.ac.uk/QuickGO/GTerm?id=GO:0071279	[]
7	4,6,7	positive regulation of trophoblast cell migration	GO:1901165	0.0123	0.0331	0	-0.33	12.23	-2.88385	ACVR1B|0.1294	1	3	159	38520	http://www.ebi.ac.uk/QuickGO/GTerm?id=GO:1901165	[]
10	9,10	positive regulation of peptidyl-tyrosine autophosphorylation	GO:1900086	0.0123	0.0331	0	-0.33	12.23	-2.88385	ACE|2.2909	1	3	159	38520	http://www.ebi.ac.uk/QuickGO/GTerm?id=GO:1900086	[]
6	5,6	insulin processing	GO:0030070	0.0123	0.0331	0	-0.33	12.23	-2.88385	CPE|4.4055	1	3	159	38520	http://www.ebi.ac.uk/QuickGO/GTerm?id=GO:0030070	[]
9	4,6,7,8,9	positive regulation of nucleotide-binding oligomerization domain containing signaling pathway	GO:0070426	0.0123	0.0331	0	-0.33	12.23	-2.88385	HSPA1B|4.3652	1	3	159	38520	http://www.ebi.ac.uk/QuickGO/GTerm?id=GO:0070426	[]
6	5,6	positive regulation of fibroblast growth factor production	GO:0090271	0.0123	0.0331	0	-0.33	12.23	-2.88385	HEG1|0.0839	1	3	159	38520	http://www.ebi.ac.uk/QuickGO/GTerm?id=GO:0090271	[]
8	6,7,8	sequestering of TGFbeta in extracellular matrix	GO:0035583	0.0123	0.0331	0	-0.33	12.23	-2.88385	FBN1|0.207	1	3	159	38520	http://www.ebi.ac.uk/QuickGO/GTerm?id=GO:0035583	[]
5	5	response to mycotoxin	GO:0010046	0.0123	0.0331	0	-0.33	12.23	-2.88385	ASS1|2.4889	1	3	159	38520	http://www.ebi.ac.uk/QuickGO/GTerm?id=GO:0010046	[]
7	5,7	regulation of embryonic cell shape	GO:0016476	0.0123	0.0331	0	-0.33	12.23	-2.88385	DAG1|3.02	1	3	159	38520	http://www.ebi.ac.uk/QuickGO/GTerm?id=GO:0016476	[]
6	6	antibacterial peptide biosynthetic process	GO:0002780	0.0123	0.0331	0	-0.33	12.23	-2.88385	MMP7|0.0619	1	3	159	38520	http://www.ebi.ac.uk/QuickGO/GTerm?id=GO:0002780	[]
8	7,8	triglyceride transport	GO:0034197	0.0123	0.0331	0	-0.33	12.23	-2.88385	APOH|11.9124	1	3	159	38520	http://www.ebi.ac.uk/QuickGO/GTerm?id=GO:0034197	[]
8	8	regulation of immunoglobulin mediated immune response	GO:0002889	0.0125	0.0334	0.88	-0.24	12.23	-2.88385	C3|1.4997;PVRL2|0.0887	2	41	159	38520	http://www.ebi.ac.uk/QuickGO/GTerm?id=GO:0002889	[]
9	6,7,8,9	axon regeneration	GO:0031103	0.0125	0.0334	-0.42	-0.37	12.23	-2.88385	SPP1|0.1406;APOA1|18.8799	2	41	159	38520	http://www.ebi.ac.uk/QuickGO/GTerm?id=GO:0031103	[]
3	3	positive regulation of developmental process	GO:0051094	0.0125	0.0335	9.7	0.66	12.23	-2.88385	C3|1.4997;APOA1|18.8799;OLFM4|0.2512;SERPINF1|3.2509;DAG1|3.02;FGG|3.0479;PNP|7.7983;ACVR1B|0.1294;ARHGDIA|31.3329;CDC42|99.0832;ECM1|7.9433	11	1217	159	38520	http://www.ebi.ac.uk/QuickGO/GTerm?id=GO:0051094	[]
6	6	cellular response to lipid	GO:0071396	0.0125	0.0335	-0.15	-0.34	12.23	-2.88385	KRT13|0.278;ANXA1|0.2089;CD55|0.2535;ASS1|2.4889;SERPINF1|3.2509;GSTP1|11.8032	6	461	159	38520	http://www.ebi.ac.uk/QuickGO/GTerm?id=GO:0071396	[]
5	5	positive regulation of cellular catabolic process	GO:0031331	0.0125	0.0335	5.1	0.19	12.23	-2.88385	APOA4|15.2757;APOA1|18.8799;ANXA5|3.6308;PARK7|5.445;FABP1|14.3219;MYLK|0.6427	6	461	159	38520	http://www.ebi.ac.uk/QuickGO/GTerm?id=GO:0031331	[]
6	5,6	negative regulation of gene expression	GO:0010629	0.0129	0.0343	11.67	0.87	12.23	-2.88385	A2M|7.5858;ENO1|7.8705;HSPA8|4.3251;GAPDH|6.0256;CD55|0.2535;ANXA4|3.342;CAT|15.417;SERPINF1|3.2509;PARK7|5.445;TXN|16.4437;SCGB1A1|0.3532;ELANE|0.4246;ACVR1B|0.1294;CDC42|99.0832	14	1733	159	38520	http://www.ebi.ac.uk/QuickGO/GTerm?id=GO:0010629	[]
7	6,7	cell morphogenesis involved in neuron differentiation	GO:0048667	0.0129	0.0344	7.95	0.49	12.23	-2.88385	SPP1|0.1406;HSPA8|4.3251;SOD1|16.1436;EPHB4|0.6081;HSP90AA1|11.5878;DAG1|3.02;ARHGDIA|31.3329;CDC42|99.0832	8	749	159	38520	http://www.ebi.ac.uk/QuickGO/GTerm?id=GO:0048667	[]
8	5,6,7,8	negative regulation of apoptotic signaling pathway	GO:2001234	0.0129	0.0345	2.93	-0.03	12.23	-2.88385	HSPA1B|4.3652;PARK7|5.445;GSTP1|11.8032;FGG|3.0479	4	218	159	38520	http://www.ebi.ac.uk/QuickGO/GTerm?id=GO:2001234	[]
6	6	cellular response to organic cyclic compound	GO:0071407	0.013	0.0347	4.43	0.13	12.23	-2.88385	CDH1|0.7311;ANXA1|0.2089;SOD1|16.1436;ASS1|2.4889;SERPINF1|3.2509;ARHGDIA|31.3329	6	465	159	38520	http://www.ebi.ac.uk/QuickGO/GTerm?id=GO:0071407	[]
4	4	circadian behavior	GO:0048512	0.0131	0.0348	1.35	-0.19	12.23	-2.88385	NAGLU|8.3946;AHCY|2.6546	2	42	159	38520	http://www.ebi.ac.uk/QuickGO/GTerm?id=GO:0048512	[]
7	7	regulation of B cell mediated immunity	GO:0002712	0.0131	0.0348	0.88	-0.24	12.23	-2.88385	C3|1.4997;PVRL2|0.0887	2	42	159	38520	http://www.ebi.ac.uk/QuickGO/GTerm?id=GO:0002712	[]
3	3	anatomical structure formation involved in morphogenesis	GO:0048646	0.0133	0.0354	10.83	0.78	12.23	-2.88385	C3|1.4997;ANPEP|12.0226;ENPEP|21.0863;ROBO4|23.1206;KLK3|4.4875;APOH|11.9124;PVRL2|0.0887;SERPINF1|3.2509;EPHB4|0.6081;DAG1|3.02;CDC42|99.0832;ECM1|7.9433	12	1396	159	38520	http://www.ebi.ac.uk/QuickGO/GTerm?id=GO:0048646	[]
6	6	phenol-containing compound biosynthetic process	GO:0046189	0.0137	0.0362	2	-0.12	12.23	-2.88385	PARK7|5.445;DDT|18.5353	2	43	159	38520	http://www.ebi.ac.uk/QuickGO/GTerm?id=GO:0046189	[]
4	4	cellular extravasation	GO:0045123	0.0137	0.0362	-0.74	-0.4	12.23	-2.88385	OLFM4|0.2512;MADCAM1|0.7178	2	43	159	38520	http://www.ebi.ac.uk/QuickGO/GTerm?id=GO:0045123	[]
5	5	response to amine	GO:0014075	0.0137	0.0362	1.6	-0.16	12.23	-2.88385	SOD1|16.1436;ASS1|2.4889	2	43	159	38520	http://www.ebi.ac.uk/QuickGO/GTerm?id=GO:0014075	[]
3	3	rhythmic behavior	GO:0007622	0.0137	0.0362	1.35	-0.19	12.23	-2.88385	NAGLU|8.3946;AHCY|2.6546	2	43	159	38520	http://www.ebi.ac.uk/QuickGO/GTerm?id=GO:0007622	[]
7	6,7	regulation of interleukin-1 beta production	GO:0032651	0.0137	0.0362	2.35	-0.09	12.23	-2.88385	APOA1|18.8799;GSTP1|11.8032	2	43	159	38520	http://www.ebi.ac.uk/QuickGO/GTerm?id=GO:0032651	[]
5	5	small molecule catabolic process	GO:0044282	0.0137	0.0363	3.29	0.01	12.23	-2.88385	PARK7|5.445;SORD|1.7219;FABP1|14.3219;AHCY|2.6546;FAH|5.445	5	340	159	38520	http://www.ebi.ac.uk/QuickGO/GTerm?id=GO:0044282	[]
5	5	heart morphogenesis	GO:0003007	0.0138	0.0363	-0.51	-0.38	12.23	-2.88385	GAA|14.4544;HEG1|0.0839;CPE|4.4055;EPHB4|0.6081	4	222	159	38520	http://www.ebi.ac.uk/QuickGO/GTerm?id=GO:0003007	[]
5	5	nitrogen compound transport	GO:0071705	0.0138	0.0364	1.04	-0.22	12.23	-2.88385	CUBN|0.3597;ANXA1|0.2089;HBB|1.6904;PRDX1|3.1623;S100A8|0.2965;S100A9|0.3945;PARK7|5.445;TTR|1.9055;FGG|3.0479;MMP7|0.0619	10	1071	159	38520	http://www.ebi.ac.uk/QuickGO/GTerm?id=GO:0071705	[]
9	8,9	regulation of peptidyl-serine phosphorylation	GO:0033135	0.0139	0.0367	3.95	0.08	12.23	-2.88385	PARK7|5.445;TXN|16.4437;CDC42|99.0832	3	121	159	38520	http://www.ebi.ac.uk/QuickGO/GTerm?id=GO:0033135	[]
4	4	development of primary sexual characteristics	GO:0045137	0.014	0.0368	4.4	0.12	12.23	-2.88385	SOD1|16.1436;IDH1|2.3335;ACVR1B|0.1294;PLEKHA1|85.5067	4	223	159	38520	http://www.ebi.ac.uk/QuickGO/GTerm?id=GO:0045137	[]
6	6	actin filament organization	GO:0007015	0.0141	0.037	6.18	0.3	12.23	-2.88385	TF|1.2823;APOA1|18.8799;ALDOA|1.7378;ACTN4|10.8643;SH3BGRL3|0.0461;MYLK|0.6427;CDC42|99.0832	7	613	159	38520	http://www.ebi.ac.uk/QuickGO/GTerm?id=GO:0007015	[]
5	4,5	regulation of symbiosis, encompassing mutualism through parasitism	GO:0043903	0.0142	0.0373	-3.28	-0.66	12.23	-2.88385	FBLN1|0.1067;PPIA|7.5858;PVRL2|0.0887;ELANE|0.4246	4	224	159	38520	http://www.ebi.ac.uk/QuickGO/GTerm?id=GO:0043903	[]
3	3	negative regulation of growth	GO:0045926	0.0142	0.0373	-3.01	-0.64	12.23	-2.88385	SPP1|0.1406;ENO1|7.8705;ELANE|0.4246;ACVR1B|0.1294	4	224	159	38520	http://www.ebi.ac.uk/QuickGO/GTerm?id=GO:0045926	[]
7	5,6,7	protein import	GO:0017038	0.0142	0.0373	3.4	0.02	12.23	-2.88385	CDH1|0.7311;PRDX1|3.1623;HSP90AA1|11.5878;DAG1|3.02;TXN|16.4437	5	343	159	38520	http://www.ebi.ac.uk/QuickGO/GTerm?id=GO:0017038	[]
9	9	endothelial cell apoptotic process	GO:0072577	0.0143	0.0375	-0.21	-0.35	12.23	-2.88385	CD248|0.5297;FGG|3.0479	2	44	159	38520	http://www.ebi.ac.uk/QuickGO/GTerm?id=GO:0072577	[]
7	5,6,7	positive regulation of phagocytosis	GO:0050766	0.0143	0.0375	0	-0.33	12.23	-2.88385	C3|1.4997;C4A|0.673	2	44	159	38520	http://www.ebi.ac.uk/QuickGO/GTerm?id=GO:0050766	[]
5	4,5	antimicrobial humoral response	GO:0019730	0.0143	0.0375	0.56	-0.27	12.23	-2.88385	KLK3|4.4875;MMP7|0.0619	2	44	159	38520	http://www.ebi.ac.uk/QuickGO/GTerm?id=GO:0019730	[]
7	7	protein localization to nucleus	GO:0034504	0.0144	0.0376	3.07	-0.01	12.23	-2.88385	CDH1|0.7311;PRDX1|3.1623;PARK7|5.445;DAG1|3.02;TXN|16.4437	5	344	159	38520	http://www.ebi.ac.uk/QuickGO/GTerm?id=GO:0034504	[]
9	5,6,7,9	regulation of defense response to virus by host	GO:0050691	0.0149	0.0389	0.19	-0.31	12.23	-2.88385	ANXA5|3.6308;FABP1|14.3219;MYLK|0.6427	3	124	159	38520	http://www.ebi.ac.uk/QuickGO/GTerm?id=GO:0050691	[]
5	5	substantia nigra development	GO:0021762	0.0149	0.039	2.48	-0.07	12.23	-2.88385	CKB|3.0761;CDC42|99.0832	2	45	159	38520	http://www.ebi.ac.uk/QuickGO/GTerm?id=GO:0021762	[]
8	8	monovalent inorganic anion homeostasis	GO:0055083	0.0149	0.039	1.33	-0.19	12.23	-2.88385	CKB|3.0761;FGFR4|6.9823	2	45	159	38520	http://www.ebi.ac.uk/QuickGO/GTerm?id=GO:0055083	[]
5	5	positive regulation of cell migration	GO:0030335	0.015	0.0392	-3.23	-0.66	12.23	-2.88385	FBLN1|0.1067;ACTN4|10.8643;MADCAM1|0.7178;ACVR1B|0.1294;MYLK|0.6427	5	348	159	38520	http://www.ebi.ac.uk/QuickGO/GTerm?id=GO:0030335	[]
8	6,7,8	keratinocyte differentiation	GO:0030216	0.0155	0.0405	-2	-0.53	12.23	-2.88385	ANXA1|0.2089;MADCAM1|0.7178;CDC42|99.0832	3	126	159	38520	http://www.ebi.ac.uk/QuickGO/GTerm?id=GO:0030216	[]
8	6,7,8	negative regulation of axonogenesis	GO:0050771	0.0156	0.0405	-0.64	-0.39	12.23	-2.88385	SPP1|0.1406;ARHGDIA|31.3329	2	46	159	38520	http://www.ebi.ac.uk/QuickGO/GTerm?id=GO:0050771	[]
7	6,7	inner ear receptor cell development	GO:0060119	0.0156	0.0405	2.13	-0.11	12.23	-2.88385	NAGLU|8.3946;SOD1|16.1436	2	46	159	38520	http://www.ebi.ac.uk/QuickGO/GTerm?id=GO:0060119	[]
5	5	regulation of response to extracellular stimulus	GO:0032104	0.0157	0.0407	2.64	-0.06	12.23	-2.88385	ANXA5|3.6308;PARK7|5.445;FABP1|14.3219;MYLK|0.6427	4	231	159	38520	http://www.ebi.ac.uk/QuickGO/GTerm?id=GO:0032104	[]
3	3	positive regulation of growth	GO:0045927	0.0157	0.0407	-2.1	-0.54	12.23	-2.88385	C3|1.4997;F2|0.1009;S100A8|0.2965;S100A9|0.3945	4	231	159	38520	http://www.ebi.ac.uk/QuickGO/GTerm?id=GO:0045927	[]
6	6	regulation of response to nutrient levels	GO:0032107	0.0157	0.0407	2.64	-0.06	12.23	-2.88385	ANXA5|3.6308;PARK7|5.445;FABP1|14.3219;MYLK|0.6427	4	231	159	38520	http://www.ebi.ac.uk/QuickGO/GTerm?id=GO:0032107	[]
5	5	respiratory system development	GO:0060541	0.0157	0.0407	3.95	0.08	12.23	-2.88385	HEG1|0.0839;ASS1|2.4889;DAG1|3.02;CDC42|99.0832	4	231	159	38520	http://www.ebi.ac.uk/QuickGO/GTerm?id=GO:0060541	[]
6	6	neuron apoptotic process	GO:0051402	0.0159	0.0413	4.72	0.16	12.23	-2.88385	GAPDH|6.0256;SOD1|16.1436;PARK7|5.445;CDC42|99.0832	4	232	159	38520	http://www.ebi.ac.uk/QuickGO/GTerm?id=GO:0051402	[]
4	4	detection of external stimulus	GO:0009581	0.0159	0.0413	3.1	-0.01	12.23	-2.88385	LRP2|0.4365;APOA4|15.2757;APOA1|18.8799;TTR|1.9055	4	232	159	38520	http://www.ebi.ac.uk/QuickGO/GTerm?id=GO:0009581	[]
7	6,7	Schwann cell differentiation	GO:0014037	0.0162	0.0413	1.69	-0.16	12.23	-2.88385	SOD1|16.1436;DAG1|3.02	2	47	159	38520	http://www.ebi.ac.uk/QuickGO/GTerm?id=GO:0014037	[]
6	6	heterophilic cell-cell adhesion via plasma membrane cell adhesion molecules	GO:0007157	0.0162	0.0413	-2	-0.53	12.23	-2.88385	CADM4|0.1117;PVRL2|0.0887	2	47	159	38520	http://www.ebi.ac.uk/QuickGO/GTerm?id=GO:0007157	[]
5	5	response to cytokine	GO:0034097	0.0163	0.0413	6.92	0.38	12.23	-2.88385	ANXA1|0.2089;APOA1|18.8799;MME|5.2481;GAPDH|6.0256;ASS1|2.4889;HSPA1B|4.3652;GSTP1|11.8032;SCGB1A1|0.3532;ECM1|7.9433	9	938	159	38520	http://www.ebi.ac.uk/QuickGO/GTerm?id=GO:0034097	[]
6	5,6	positive regulation of transferase activity	GO:0051347	0.0163	0.0413	7.27	0.42	12.23	-2.88385	TF|1.2823;APOA1|18.8799;SOD1|16.1436;PARK7|5.445;TXN|16.4437;ELANE|0.4246;ACE|2.2909;CDC42|99.0832	8	782	159	38520	http://www.ebi.ac.uk/QuickGO/GTerm?id=GO:0051347	[]
9	7,9	regulation of mitochondrial electron transport, NADH to ubiquinone	GO:1902956	0.0164	0.0413	0	-0.33	12.23	-2.88385	PARK7|5.445	1	4	159	38520	http://www.ebi.ac.uk/QuickGO/GTerm?id=GO:1902956	[]
9	7,9	involuntary skeletal muscle contraction	GO:0003011	0.0164	0.0413	0	-0.33	12.23	-2.88385	GAA|14.4544	1	4	159	38520	http://www.ebi.ac.uk/QuickGO/GTerm?id=GO:0003011	[]
7	5,6,7	positive regulation of cellular respiration	GO:1901857	0.0164	0.0413	0	-0.33	12.23	-2.88385	PARK7|5.445	1	4	159	38520	http://www.ebi.ac.uk/QuickGO/GTerm?id=GO:1901857	[]
7	6,7	immunoglobulin transcytosis in epithelial cells	GO:0002414	0.0164	0.0413	0	-0.33	12.23	-2.88385	PIGR|0.7586	1	4	159	38520	http://www.ebi.ac.uk/QuickGO/GTerm?id=GO:0002414	[]
6	6	positive regulation of dopamine metabolic process	GO:0045964	0.0164	0.0413	0	-0.33	12.23	-2.88385	PARK7|5.445	1	4	159	38520	http://www.ebi.ac.uk/QuickGO/GTerm?id=GO:0045964	[]
8	5,6,8	regulation of gap junction assembly	GO:1903596	0.0164	0.0413	0	-0.33	12.23	-2.88385	ACE|2.2909	1	4	159	38520	http://www.ebi.ac.uk/QuickGO/GTerm?id=GO:1903596	[]
10	9,10	Cdc42 protein signal transduction	GO:0032488	0.0164	0.0413	0	-0.33	12.23	-2.88385	APOA1|18.8799	1	4	159	38520	http://www.ebi.ac.uk/QuickGO/GTerm?id=GO:0032488	[]
7	6,7	negative regulation of nitric-oxide synthase biosynthetic process	GO:0051771	0.0164	0.0413	0	-0.33	12.23	-2.88385	GSTP1|11.8032	1	4	159	38520	http://www.ebi.ac.uk/QuickGO/GTerm?id=GO:0051771	[]
10	9,10	regulation of peptidyl-tyrosine autophosphorylation	GO:1900084	0.0164	0.0413	0	-0.33	12.23	-2.88385	ACE|2.2909	1	4	159	38520	http://www.ebi.ac.uk/QuickGO/GTerm?id=GO:1900084	[]
4	4	common myeloid progenitor cell proliferation	GO:0035726	0.0164	0.0413	0	-0.33	12.23	-2.88385	GSTP1|11.8032	1	4	159	38520	http://www.ebi.ac.uk/QuickGO/GTerm?id=GO:0035726	[]
8	6,8	positive regulation of catecholamine metabolic process	GO:0045915	0.0164	0.0413	0	-0.33	12.23	-2.88385	PARK7|5.445	1	4	159	38520	http://www.ebi.ac.uk/QuickGO/GTerm?id=GO:0045915	[]
6	4,6	detoxification of inorganic compound	GO:0061687	0.0164	0.0413	0	-0.33	12.23	-2.88385	PARK7|5.445	1	4	159	38520	http://www.ebi.ac.uk/QuickGO/GTerm?id=GO:0061687	[]
5	5	negative regulation of interleukin-8 biosynthetic process	GO:0045415	0.0164	0.0413	0	-0.33	12.23	-2.88385	ELANE|0.4246	1	4	159	38520	http://www.ebi.ac.uk/QuickGO/GTerm?id=GO:0045415	[]
8	6,8	plasma lipoprotein particle oxidation	GO:0034441	0.0164	0.0413	0	-0.33	12.23	-2.88385	APOA4|15.2757	1	4	159	38520	http://www.ebi.ac.uk/QuickGO/GTerm?id=GO:0034441	[]
6	6	lactate biosynthetic process	GO:0019249	0.0164	0.0413	0	-0.33	12.23	-2.88385	PARK7|5.445	1	4	159	38520	http://www.ebi.ac.uk/QuickGO/GTerm?id=GO:0019249	[]
7	6,7	transformation of host cell by virus	GO:0019087	0.0164	0.0413	0	-0.33	12.23	-2.88385	FBLN1|0.1067	1	4	159	38520	http://www.ebi.ac.uk/QuickGO/GTerm?id=GO:0019087	[]
4	4	hair follicle cell proliferation	GO:0071335	0.0164	0.0413	0	-0.33	12.23	-2.88385	CDC42|99.0832	1	4	159	38520	http://www.ebi.ac.uk/QuickGO/GTerm?id=GO:0071335	[]
8	6,7,8	regulation of nitric oxide mediated signal transduction	GO:0010749	0.0164	0.0413	0	-0.33	12.23	-2.88385	SPINK1|0.5012	1	4	159	38520	http://www.ebi.ac.uk/QuickGO/GTerm?id=GO:0010749	[]
8	5,6,7,8	positive regulation of pinocytosis	GO:0048549	0.0164	0.0413	0	-0.33	12.23	-2.88385	ACTN4|10.8643	1	4	159	38520	http://www.ebi.ac.uk/QuickGO/GTerm?id=GO:0048549	[]
11	9,10,11	regulation of Cdc42 protein signal transduction	GO:0032489	0.0164	0.0413	0	-0.33	12.23	-2.88385	APOA1|18.8799	1	4	159	38520	http://www.ebi.ac.uk/QuickGO/GTerm?id=GO:0032489	[]
6	6	cellular heat acclimation	GO:0070370	0.0164	0.0413	0	-0.33	12.23	-2.88385	HSPA1B|4.3652	1	4	159	38520	http://www.ebi.ac.uk/QuickGO/GTerm?id=GO:0070370	[]
10	9,10	cellular chloride ion homeostasis	GO:0030644	0.0164	0.0413	0	-0.33	12.23	-2.88385	CKB|3.0761	1	4	159	38520	http://www.ebi.ac.uk/QuickGO/GTerm?id=GO:0030644	[]
7	6,7	negative regulation of lipoprotein oxidation	GO:0034443	0.0164	0.0413	0	-0.33	12.23	-2.88385	APOA4|15.2757	1	4	159	38520	http://www.ebi.ac.uk/QuickGO/GTerm?id=GO:0034443	[]
10	7,8,9,10	negative regulation of protein deubiquitination	GO:0090086	0.0164	0.0413	0	-0.33	12.23	-2.88385	PARK7|5.445	1	4	159	38520	http://www.ebi.ac.uk/QuickGO/GTerm?id=GO:0090086	[]
8	6,7,8	negative regulation of extracellular matrix disassembly	GO:0010716	0.0164	0.0413	0	-0.33	12.23	-2.88385	DPP4|4.7424	1	4	159	38520	http://www.ebi.ac.uk/QuickGO/GTerm?id=GO:0010716	[]
10	7,8,9,10	positive regulation of sodium:proton antiporter activity	GO:0032417	0.0164	0.0413	0	-0.33	12.23	-2.88385	ACTN4|10.8643	1	4	159	38520	http://www.ebi.ac.uk/QuickGO/GTerm?id=GO:0032417	[]
5	5	creatinine metabolic process	GO:0046449	0.0164	0.0413	0	-0.33	12.23	-2.88385	MME|5.2481	1	4	159	38520	http://www.ebi.ac.uk/QuickGO/GTerm?id=GO:0046449	[]
8	6,7,8	regulation of integrin biosynthetic process	GO:0045113	0.0164	0.0413	0	-0.33	12.23	-2.88385	S100A9|0.3945	1	4	159	38520	http://www.ebi.ac.uk/QuickGO/GTerm?id=GO:0045113	[]
6	5,6	positive regulation of synapse structural plasticity	GO:0051835	0.0164	0.0413	0	-0.33	12.23	-2.88385	CDC42|99.0832	1	4	159	38520	http://www.ebi.ac.uk/QuickGO/GTerm?id=GO:0051835	[]
5	5	neutrophil apoptotic process	GO:0001781	0.0164	0.0413	0	-0.33	12.23	-2.88385	ANXA1|0.2089	1	4	159	38520	http://www.ebi.ac.uk/QuickGO/GTerm?id=GO:0001781	[]
6	6	cellular response to amine stimulus	GO:0071418	0.0164	0.0413	0	-0.33	12.23	-2.88385	ASS1|2.4889	1	4	159	38520	http://www.ebi.ac.uk/QuickGO/GTerm?id=GO:0071418	[]
6	5,6	vesicle transport along actin filament	GO:0030050	0.0164	0.0413	0	-0.33	12.23	-2.88385	ACTN4|10.8643	1	4	159	38520	http://www.ebi.ac.uk/QuickGO/GTerm?id=GO:0030050	[]
4	4	stress response to metal ion	GO:0097501	0.0164	0.0413	0	-0.33	12.23	-2.88385	PARK7|5.445	1	4	159	38520	http://www.ebi.ac.uk/QuickGO/GTerm?id=GO:0097501	[]
7	4,6,7	positive regulation of ion transport	GO:0043270	0.0166	0.0417	-0.58	-0.39	12.23	-2.88385	F2|0.1009;ACTN4|10.8643;PARK7|5.445;MYLK|0.6427	4	235	159	38520	http://www.ebi.ac.uk/QuickGO/GTerm?id=GO:0043270	[]
4	4	detection of abiotic stimulus	GO:0009582	0.0166	0.0417	3.1	-0.01	12.23	-2.88385	LRP2|0.4365;APOA4|15.2757;APOA1|18.8799;TTR|1.9055	4	235	159	38520	http://www.ebi.ac.uk/QuickGO/GTerm?id=GO:0009582	[]
4	4	heart development	GO:0007507	0.0166	0.0417	-1.82	-0.51	12.23	-2.88385	FBN1|0.207;GAA|14.4544;HEG1|0.0839;CPE|4.4055;EPHB4|0.6081;CDC42|99.0832	6	491	159	38520	http://www.ebi.ac.uk/QuickGO/GTerm?id=GO:0007507	[]
6	4,5,6	positive regulation of macromolecule metabolic process	GO:0010604	0.0168	0.0422	15.53	1.26	12.23	-2.88385	TF|1.2823;C3|1.4997;PSAP|7.656;F2|0.1009;CDH1|0.7311;HSPA8|4.3251;HEXB|2.729;FBLN1|0.1067;CAT|15.417;SOD1|16.1436;HSPA1B|4.3652;S100A8|0.2965;S100A9|0.3945;PARK7|5.445;FGG|3.0479;TXN|16.4437;CD63|2.0893;ELANE|0.4246;ACE|2.2909;ACVR1B|0.1294;FGFR4|6.9823;CDC42|99.0832	22	3292	159	38520	http://www.ebi.ac.uk/QuickGO/GTerm?id=GO:0010604	[]
4	4	response to mechanical stimulus	GO:0009612	0.0168	0.0422	-4.26	-0.76	12.23	-2.88385	F2|0.1009;IGFBP2|0.2754;ARHGDIA|31.3329;MMP7|0.0619	4	236	159	38520	http://www.ebi.ac.uk/QuickGO/GTerm?id=GO:0009612	[]
8	8	peptidyl-glutamic acid modification	GO:0018200	0.0169	0.0422	-0.12	-0.34	12.23	-2.88385	F2|0.1009;PROZ|13.0617	2	48	159	38520	http://www.ebi.ac.uk/QuickGO/GTerm?id=GO:0018200	[]
6	4,6	negative regulation of epithelial cell migration	GO:0010633	0.0169	0.0422	1.59	-0.17	12.23	-2.88385	APOH|11.9124;SERPINF1|3.2509	2	48	159	38520	http://www.ebi.ac.uk/QuickGO/GTerm?id=GO:0010633	[]
7	6,7	intrinsic apoptotic signaling pathway in response to oxidative stress	GO:0008631	0.0169	0.0422	1.94	-0.13	12.23	-2.88385	SOD1|16.1436;PARK7|5.445	2	48	159	38520	http://www.ebi.ac.uk/QuickGO/GTerm?id=GO:0008631	[]
7	6,7	regulation of intracellular protein transport	GO:0033157	0.0171	0.0429	4.58	0.14	12.23	-2.88385	CDH1|0.7311;PRDX1|3.1623;PARK7|5.445;TXN|16.4437;CDC42|99.0832	5	360	159	38520	http://www.ebi.ac.uk/QuickGO/GTerm?id=GO:0033157	[]
7	6,7	positive regulation of lymphocyte proliferation	GO:0050671	0.0172	0.043	-0.89	-0.42	12.23	-2.88385	CD55|0.2535;IGFBP2|0.2754;PNP|7.7983	3	131	159	38520	http://www.ebi.ac.uk/QuickGO/GTerm?id=GO:0050671	[]
6	6	positive regulation of mononuclear cell proliferation	GO:0032946	0.0175	0.0438	-0.89	-0.42	12.23	-2.88385	CD55|0.2535;IGFBP2|0.2754;PNP|7.7983	3	132	159	38520	http://www.ebi.ac.uk/QuickGO/GTerm?id=GO:0032946	[]
10	10	iron ion homeostasis	GO:0055072	0.0175	0.0438	0.69	-0.26	12.23	-2.88385	TF|1.2823;SOD1|16.1436;LCN2|0.2051	3	132	159	38520	http://www.ebi.ac.uk/QuickGO/GTerm?id=GO:0055072	[]
8	7,8	phosphatidylinositol-mediated signaling	GO:0048015	0.0176	0.0438	4.96	0.18	12.23	-2.88385	F2|0.1009;CAT|15.417;FGFR4|6.9823;PLEKHA1|85.5067	4	239	159	38520	http://www.ebi.ac.uk/QuickGO/GTerm?id=GO:0048015	[]
5	5	protein complex subunit organization	GO:0071822	0.0177	0.044	13.77	1.08	12.23	-2.88385	TF|1.2823;APOA1|18.8799;HSPA8|4.3251;OLFM4|0.2512;HBB|1.6904;CAT|15.417;ALDOA|1.7378;HBA1|1.6144;ACTN4|10.8643;SH3BGRL3|0.0461;GPX3|15.1356;ANXA5|3.6308;PARK7|5.445;HSP90AA1|11.5878;DPT|0.1995;FGG|3.0479;MYLK|0.6427;CDC42|99.0832	18	2540	159	38520	http://www.ebi.ac.uk/QuickGO/GTerm?id=GO:0071822	[]
7	6,7	regulation of stress-activated MAPK cascade	GO:0032872	0.0178	0.0443	3.68	0.05	12.23	-2.88385	TF|1.2823;PRDX1|3.1623;GSTP1|11.8032;CDC42|99.0832	4	240	159	38520	http://www.ebi.ac.uk/QuickGO/GTerm?id=GO:0032872	[]
6	6	leukocyte differentiation	GO:0002521	0.0178	0.0444	5.38	0.22	12.23	-2.88385	TF|1.2823;ANXA1|0.2089;SOD1|16.1436;GLO1|3.1333;PNP|7.7983;CDC42|99.0832	6	499	159	38520	http://www.ebi.ac.uk/QuickGO/GTerm?id=GO:0002521	[]
7	6,7	inositol lipid-mediated signaling	GO:0048017	0.018	0.0448	4.96	0.18	12.23	-2.88385	F2|0.1009;CAT|15.417;FGFR4|6.9823;PLEKHA1|85.5067	4	241	159	38520	http://www.ebi.ac.uk/QuickGO/GTerm?id=GO:0048017	[]
5	5	cellular amine metabolic process	GO:0044106	0.018	0.0448	4.33	0.11	12.23	-2.88385	APOA4|15.2757;APOA1|18.8799;BHMT|13.5519;PARK7|5.445	4	241	159	38520	http://www.ebi.ac.uk/QuickGO/GTerm?id=GO:0044106	[]
6	5,6	regulation of stress-activated protein kinase signaling cascade	GO:0070302	0.018	0.0448	3.68	0.05	12.23	-2.88385	TF|1.2823;PRDX1|3.1623;GSTP1|11.8032;CDC42|99.0832	4	241	159	38520	http://www.ebi.ac.uk/QuickGO/GTerm?id=GO:0070302	[]
4	4	gamete generation	GO:0007276	0.0182	0.0451	6.38	0.32	12.23	-2.88385	GGT1|5.2;SERPINA5|0.2109;HEXB|2.729;SOD1|16.1436;PVRL2|0.0887;ACE|2.2909;PLEKHA1|85.5067	7	646	159	38520	http://www.ebi.ac.uk/QuickGO/GTerm?id=GO:0007276	[]
7	7	purine nucleotide catabolic process	GO:0006195	0.0182	0.0451	2.08	-0.12	12.23	-2.88385	CAT|15.417;PNP|7.7983	2	50	159	38520	http://www.ebi.ac.uk/QuickGO/GTerm?id=GO:0006195	[]
6	6	interleukin-1 beta production	GO:0032611	0.0182	0.0451	2.35	-0.09	12.23	-2.88385	APOA1|18.8799;GSTP1|11.8032	2	50	159	38520	http://www.ebi.ac.uk/QuickGO/GTerm?id=GO:0032611	[]
9	7,8,9	positive regulation of alpha-beta T cell activation	GO:0046635	0.0182	0.0451	-0.3	-0.36	12.23	-2.88385	CD55|0.2535;PNP|7.7983	2	50	159	38520	http://www.ebi.ac.uk/QuickGO/GTerm?id=GO:0046635	[]
6	5,6	regulation of interleukin-1 production	GO:0032652	0.0182	0.0451	2.35	-0.09	12.23	-2.88385	APOA1|18.8799;GSTP1|11.8032	2	50	159	38520	http://www.ebi.ac.uk/QuickGO/GTerm?id=GO:0032652	[]
6	6	activation of mitophagy in response to mitochondrial depolarization	GO:0098779	0.0186	0.046	0.19	-0.31	12.23	-2.88385	ANXA5|3.6308;FABP1|14.3219;MYLK|0.6427	3	135	159	38520	http://www.ebi.ac.uk/QuickGO/GTerm?id=GO:0098779	[]
5	5	response to mitochondrial depolarisation	GO:0098780	0.0186	0.046	0.19	-0.31	12.23	-2.88385	ANXA5|3.6308;FABP1|14.3219;MYLK|0.6427	3	135	159	38520	http://www.ebi.ac.uk/QuickGO/GTerm?id=GO:0098780	[]
4	4	response to temperature stimulus	GO:0009266	0.0188	0.0464	3.55	0.04	12.23	-2.88385	HSPA8|4.3251;SOD1|16.1436;HSPA1B|4.3652;HSP90AA1|11.5878	4	244	159	38520	http://www.ebi.ac.uk/QuickGO/GTerm?id=GO:0009266	[]
5	5	bile acid metabolic process	GO:0008206	0.0189	0.0466	0.93	-0.23	12.23	-2.88385	ALB|1.2246;FGFR4|6.9823	2	51	159	38520	http://www.ebi.ac.uk/QuickGO/GTerm?id=GO:0008206	[]
6	5,6	negative regulation of cell-substrate adhesion	GO:0010812	0.0189	0.0466	-0.06	-0.33	12.23	-2.88385	FBLN1|0.1067;ACTN4|10.8643	2	51	159	38520	http://www.ebi.ac.uk/QuickGO/GTerm?id=GO:0010812	[]
5	5	positive regulation of leukocyte proliferation	GO:0070665	0.019	0.0467	-0.89	-0.42	12.23	-2.88385	CD55|0.2535;IGFBP2|0.2754;PNP|7.7983	3	136	159	38520	http://www.ebi.ac.uk/QuickGO/GTerm?id=GO:0070665	[]
6	6	adherens junction organization	GO:0034332	0.019	0.0467	-2	-0.53	12.23	-2.88385	CDH1|0.7311;PVRL2|0.0887;CDC42|99.0832	3	136	159	38520	http://www.ebi.ac.uk/QuickGO/GTerm?id=GO:0034332	[]
5	4,5	positive regulation of cell growth	GO:0030307	0.019	0.0467	-1.93	-0.53	12.23	-2.88385	F2|0.1009;S100A8|0.2965;S100A9|0.3945	3	136	159	38520	http://www.ebi.ac.uk/QuickGO/GTerm?id=GO:0030307	[]
8	7,8	axonogenesis	GO:0007409	0.0192	0.0471	6.74	0.36	12.23	-2.88385	SPP1|0.1406;HSPA8|4.3251;EPHB4|0.6081;HSP90AA1|11.5878;DAG1|3.02;ARHGDIA|31.3329;CDC42|99.0832	7	653	159	38520	http://www.ebi.ac.uk/QuickGO/GTerm?id=GO:0007409	[]
8	7,8	transmembrane receptor protein tyrosine kinase signaling pathway	GO:0007169	0.0192	0.0471	9.59	0.65	12.23	-2.88385	PIGR|0.7586;EFEMP1|0.0904;IGFBP2|0.2754;EPHB4|0.6081;HSP90AA1|11.5878;CD63|2.0893;ARHGDIA|31.3329;FGFR4|6.9823;PLEKHA1|85.5067;CDC42|99.0832	10	1129	159	38520	http://www.ebi.ac.uk/QuickGO/GTerm?id=GO:0007169	[]
5	5	homeostasis of number of cells	GO:0048872	0.0193	0.0473	-0.14	-0.34	12.23	-2.88385	ANXA1|0.2089;SOD1|16.1436;PRDX1|3.1623;ACVR1B|0.1294	4	246	159	38520	http://www.ebi.ac.uk/QuickGO/GTerm?id=GO:0048872	[]
3	3	negative regulation of immune system process	GO:0002683	0.0195	0.0477	-2.16	-0.55	12.23	-2.88385	A2M|7.5858;APOA1|18.8799;OLFM4|0.2512;CD55|0.2535;SCGB1A1|0.3532	5	372	159	38520	http://www.ebi.ac.uk/QuickGO/GTerm?id=GO:0002683	[]
7	6,7	bone resorption	GO:0045453	0.0196	0.0479	0.74	-0.25	12.23	-2.88385	TF|1.2823;SPP1|0.1406	2	52	159	38520	http://www.ebi.ac.uk/QuickGO/GTerm?id=GO:0045453	[]
9	7,8,9	regulation of epithelial cell apoptotic process	GO:1904035	0.0196	0.0479	-0.21	-0.35	12.23	-2.88385	CD248|0.5297;FGG|3.0479	2	52	159	38520	http://www.ebi.ac.uk/QuickGO/GTerm?id=GO:1904035	[]
7	6,7	regulation of steroid biosynthetic process	GO:0050810	0.0196	0.0479	2.05	-0.12	12.23	-2.88385	SOD1|16.1436;FGFR4|6.9823	2	52	159	38520	http://www.ebi.ac.uk/QuickGO/GTerm?id=GO:0050810	[]
9	8,9	cholesterol efflux	GO:0033344	0.0196	0.0479	2.46	-0.08	12.23	-2.88385	APOA4|15.2757;APOA1|18.8799	2	52	159	38520	http://www.ebi.ac.uk/QuickGO/GTerm?id=GO:0033344	[]
5	5	exocrine system development	GO:0035272	0.0196	0.0479	2.48	-0.07	12.23	-2.88385	DAG1|3.02;CDC42|99.0832	2	52	159	38520	http://www.ebi.ac.uk/QuickGO/GTerm?id=GO:0035272	[]
6	5,6	positive regulation of cell development	GO:0010720	0.0198	0.0481	6.36	0.32	12.23	-2.88385	APOA1|18.8799;OLFM4|0.2512;SERPINF1|3.2509;FGG|3.0479;ARHGDIA|31.3329;CDC42|99.0832	6	511	159	38520	http://www.ebi.ac.uk/QuickGO/GTerm?id=GO:0010720	[]
6	6	cellular response to lipopolysaccharide	GO:0071222	0.0201	0.0481	0.6	-0.27	12.23	-2.88385	CD55|0.2535;ASS1|2.4889;GSTP1|11.8032	3	139	159	38520	http://www.ebi.ac.uk/QuickGO/GTerm?id=GO:0071222	[]
6	6	glutamine family amino acid metabolic process	GO:0009064	0.0201	0.0481	1.85	-0.14	12.23	-2.88385	GGT1|5.2;ASS1|2.4889;FAH|5.445	3	139	159	38520	http://www.ebi.ac.uk/QuickGO/GTerm?id=GO:0009064	[]
8	6,7,8	negative regulation of I-kappaB kinase/NF-kappaB signaling	GO:0043124	0.0203	0.0481	-0.47	-0.38	12.23	-2.88385	OLFM4|0.2512;GSTP1|11.8032	2	53	159	38520	http://www.ebi.ac.uk/QuickGO/GTerm?id=GO:0043124	[]
6	6	spermatogenesis	GO:0007283	0.0205	0.0481	5.94	0.28	12.23	-2.88385	GGT1|5.2;SERPINA5|0.2109;SOD1|16.1436;PVRL2|0.0887;ACE|2.2909;PLEKHA1|85.5067	6	515	159	38520	http://www.ebi.ac.uk/QuickGO/GTerm?id=GO:0007283	[]
5	4,5	regulation of cell adhesion molecule production	GO:0060353	0.0205	0.0481	0	-0.33	12.23	-2.88385	APOA1|18.8799	1	5	159	38520	http://www.ebi.ac.uk/QuickGO/GTerm?id=GO:0060353	[]
6	5,6	positive regulation of basement membrane assembly involved in embryonic body morphogenesis	GO:1904261	0.0205	0.0481	0	-0.33	12.23	-2.88385	DAG1|3.02	1	5	159	38520	http://www.ebi.ac.uk/QuickGO/GTerm?id=GO:1904261	[]
9	7,8,9	negative regulation of oxidative stress-induced neuron intrinsic apoptotic signaling pathway	GO:1903377	0.0205	0.0481	0	-0.33	12.23	-2.88385	PARK7|5.445	1	5	159	38520	http://www.ebi.ac.uk/QuickGO/GTerm?id=GO:1903377	[]
8	5,6,7,8	positive regulation of integrin-mediated signaling pathway	GO:2001046	0.0205	0.0481	0	-0.33	12.23	-2.88385	CD63|2.0893	1	5	159	38520	http://www.ebi.ac.uk/QuickGO/GTerm?id=GO:2001046	[]
7	5,7	regulation of hematopoietic stem cell proliferation	GO:1902033	0.0205	0.0481	0	-0.33	12.23	-2.88385	ACE|2.2909	1	5	159	38520	http://www.ebi.ac.uk/QuickGO/GTerm?id=GO:1902033	[]
5	5	response to indole-3-methanol	GO:0071680	0.0205	0.0481	0	-0.33	12.23	-2.88385	CDH1|0.7311	1	5	159	38520	http://www.ebi.ac.uk/QuickGO/GTerm?id=GO:0071680	[]
6	5,6	regulation of basement membrane assembly involved in embryonic body morphogenesis	GO:1904259	0.0205	0.0481	0	-0.33	12.23	-2.88385	DAG1|3.02	1	5	159	38520	http://www.ebi.ac.uk/QuickGO/GTerm?id=GO:1904259	[]
5	5	polysaccharide digestion	GO:0044245	0.0205	0.0481	0	-0.33	12.23	-2.88385	MGAM|7.379	1	5	159	38520	http://www.ebi.ac.uk/QuickGO/GTerm?id=GO:0044245	[]
6	6	S-methylmethionine cycle	GO:0033528	0.0205	0.0481	0	-0.33	12.23	-2.88385	BHMT|13.5519	1	5	159	38520	http://www.ebi.ac.uk/QuickGO/GTerm?id=GO:0033528	[]
9	6,7,9	negative regulation of cholesterol biosynthetic process	GO:0045541	0.0205	0.0481	0	-0.33	12.23	-2.88385	SOD1|16.1436	1	5	159	38520	http://www.ebi.ac.uk/QuickGO/GTerm?id=GO:0045541	[]
9	6,7,8,9	negative regulation of cysteine-type endopeptidase activity involved in apoptotic signaling pathway	GO:2001268	0.0205	0.0481	0	-0.33	12.23	-2.88385	PARK7|5.445	1	5	159	38520	http://www.ebi.ac.uk/QuickGO/GTerm?id=GO:2001268	[]
7	6,7	disruption by symbiont of host cell	GO:0044004	0.0205	0.0481	0	-0.33	12.23	-2.88385	ALB|1.2246	1	5	159	38520	http://www.ebi.ac.uk/QuickGO/GTerm?id=GO:0044004	[]
9	8,9	negative regulation of serine-type endopeptidase activity	GO:1900004	0.0205	0.0481	0	-0.33	12.23	-2.88385	SPINK1|0.5012	1	5	159	38520	http://www.ebi.ac.uk/QuickGO/GTerm?id=GO:1900004	[]
8	5,7,8	killing by symbiont of host cells	GO:0001907	0.0205	0.0481	0	-0.33	12.23	-2.88385	ALB|1.2246	1	5	159	38520	http://www.ebi.ac.uk/QuickGO/GTerm?id=GO:0001907	[]
10	8,9,10	TRAIL-activated apoptotic signaling pathway	GO:0036462	0.0205	0.0481	0	-0.33	12.23	-2.88385	PARK7|5.445	1	5	159	38520	http://www.ebi.ac.uk/QuickGO/GTerm?id=GO:0036462	[]
8	6,7,8	negative regulation of hydrogen peroxide-mediated programmed cell death	GO:1901299	0.0205	0.0481	0	-0.33	12.23	-2.88385	PARK7|5.445	1	5	159	38520	http://www.ebi.ac.uk/QuickGO/GTerm?id=GO:1901299	[]
5	5	regulation of fibroblast growth factor production	GO:0090270	0.0205	0.0481	0	-0.33	12.23	-2.88385	HEG1|0.0839	1	5	159	38520	http://www.ebi.ac.uk/QuickGO/GTerm?id=GO:0090270	[]
8	7,8	intrinsic apoptotic signaling pathway in response to hydrogen peroxide	GO:0036481	0.0205	0.0481	0	-0.33	12.23	-2.88385	PARK7|5.445	1	5	159	38520	http://www.ebi.ac.uk/QuickGO/GTerm?id=GO:0036481	[]
6	6	protein localization to bicellular tight junction	GO:1902396	0.0205	0.0481	0	-0.33	12.23	-2.88385	ACTN4|10.8643	1	5	159	38520	http://www.ebi.ac.uk/QuickGO/GTerm?id=GO:1902396	[]
4	4	cellular lactam metabolic process	GO:0072338	0.0205	0.0481	0	-0.33	12.23	-2.88385	MME|5.2481	1	5	159	38520	http://www.ebi.ac.uk/QuickGO/GTerm?id=GO:0072338	[]
5	5	heat acclimation	GO:0010286	0.0205	0.0481	0	-0.33	12.23	-2.88385	HSPA1B|4.3652	1	5	159	38520	http://www.ebi.ac.uk/QuickGO/GTerm?id=GO:0010286	[]
8	6,8	regulation of lipoprotein oxidation	GO:0034442	0.0205	0.0481	0	-0.33	12.23	-2.88385	APOA4|15.2757	1	5	159	38520	http://www.ebi.ac.uk/QuickGO/GTerm?id=GO:0034442	[]
9	7,9	positive regulation of hypersensitivity	GO:0002885	0.0205	0.0481	0	-0.33	12.23	-2.88385	C3|1.4997	1	5	159	38520	http://www.ebi.ac.uk/QuickGO/GTerm?id=GO:0002885	[]
5	5	S-methylmethionine metabolic process	GO:0033477	0.0205	0.0481	0	-0.33	12.23	-2.88385	BHMT|13.5519	1	5	159	38520	http://www.ebi.ac.uk/QuickGO/GTerm?id=GO:0033477	[]
7	6,7	cellular response to indole-3-methanol	GO:0071681	0.0205	0.0481	0	-0.33	12.23	-2.88385	CDH1|0.7311	1	5	159	38520	http://www.ebi.ac.uk/QuickGO/GTerm?id=GO:0071681	[]
8	6,7,8	prolactin secretion	GO:0070459	0.0205	0.0481	0	-0.33	12.23	-2.88385	ANXA1|0.2089	1	5	159	38520	http://www.ebi.ac.uk/QuickGO/GTerm?id=GO:0070459	[]
7	7	response to stilbenoid	GO:0035634	0.0205	0.0481	0	-0.33	12.23	-2.88385	APOA4|15.2757	1	5	159	38520	http://www.ebi.ac.uk/QuickGO/GTerm?id=GO:0035634	[]
7	6,7	integrin biosynthetic process	GO:0045112	0.0205	0.0481	0	-0.33	12.23	-2.88385	S100A9|0.3945	1	5	159	38520	http://www.ebi.ac.uk/QuickGO/GTerm?id=GO:0045112	[]
6	5,6	basement membrane assembly involved in embryonic body morphogenesis	GO:2001197	0.0205	0.0481	0	-0.33	12.23	-2.88385	DAG1|3.02	1	5	159	38520	http://www.ebi.ac.uk/QuickGO/GTerm?id=GO:2001197	[]
5	5	fibroblast growth factor production	GO:0090269	0.0205	0.0481	0	-0.33	12.23	-2.88385	HEG1|0.0839	1	5	159	38520	http://www.ebi.ac.uk/QuickGO/GTerm?id=GO:0090269	[]
6	5,6	response to L-ascorbic acid	GO:0033591	0.0205	0.0481	0	-0.33	12.23	-2.88385	CAT|15.417	1	5	159	38520	http://www.ebi.ac.uk/QuickGO/GTerm?id=GO:0033591	[]
10	8,9,10	negative regulation of protein sumoylation	GO:0033234	0.0205	0.0481	0	-0.33	12.23	-2.88385	PARK7|5.445	1	5	159	38520	http://www.ebi.ac.uk/QuickGO/GTerm?id=GO:0033234	[]
6	5,6	maintenance of protein location in extracellular region	GO:0071694	0.0205	0.0481	0	-0.33	12.23	-2.88385	FBN1|0.207	1	5	159	38520	http://www.ebi.ac.uk/QuickGO/GTerm?id=GO:0071694	[]
7	5,6,7	negative regulation of interleukin-13 production	GO:0032696	0.0205	0.0481	0	-0.33	12.23	-2.88385	SCGB1A1|0.3532	1	5	159	38520	http://www.ebi.ac.uk/QuickGO/GTerm?id=GO:0032696	[]
10	7,9,10	regulation of rubidium ion transport	GO:2000680	0.0205	0.0481	0	-0.33	12.23	-2.88385	CD63|2.0893	1	5	159	38520	http://www.ebi.ac.uk/QuickGO/GTerm?id=GO:2000680	[]
5	5	response to carbon monoxide	GO:0034465	0.0205	0.0481	0	-0.33	12.23	-2.88385	SOD1|16.1436	1	5	159	38520	http://www.ebi.ac.uk/QuickGO/GTerm?id=GO:0034465	[]
9	7,8,9	positive regulation of unsaturated fatty acid biosynthetic process	GO:2001280	0.0205	0.0481	0	-0.33	12.23	-2.88385	ANXA1|0.2089	1	5	159	38520	http://www.ebi.ac.uk/QuickGO/GTerm?id=GO:2001280	[]
8	5,7,8	protein import into mitochondrial outer membrane	GO:0045040	0.0205	0.0481	0	-0.33	12.23	-2.88385	HSP90AA1|11.5878	1	5	159	38520	http://www.ebi.ac.uk/QuickGO/GTerm?id=GO:0045040	[]
5	5	protein localization to extracellular region	GO:0071692	0.0205	0.0481	0	-0.33	12.23	-2.88385	FBN1|0.207	1	5	159	38520	http://www.ebi.ac.uk/QuickGO/GTerm?id=GO:0071692	[]
7	7	tyrosine catabolic process	GO:0006572	0.0205	0.0481	0	-0.33	12.23	-2.88385	FAH|5.445	1	5	159	38520	http://www.ebi.ac.uk/QuickGO/GTerm?id=GO:0006572	[]
10	4,7,8,10	regulation of very-low-density lipoprotein particle remodeling	GO:0010901	0.0205	0.0481	0	-0.33	12.23	-2.88385	APOA1|18.8799	1	5	159	38520	http://www.ebi.ac.uk/QuickGO/GTerm?id=GO:0010901	[]
10	8,9,10	positive regulation of prostaglandin biosynthetic process	GO:0031394	0.0205	0.0481	0	-0.33	12.23	-2.88385	ANXA1|0.2089	1	5	159	38520	http://www.ebi.ac.uk/QuickGO/GTerm?id=GO:0031394	[]
8	6,8	negative regulation of cholesterol metabolic process	GO:0090206	0.0205	0.0481	0	-0.33	12.23	-2.88385	SOD1|16.1436	1	5	159	38520	http://www.ebi.ac.uk/QuickGO/GTerm?id=GO:0090206	[]
10	8,9,10	negative regulation of smooth muscle cell apoptotic process	GO:0034392	0.0205	0.0481	0	-0.33	12.23	-2.88385	APOH|11.9124	1	5	159	38520	http://www.ebi.ac.uk/QuickGO/GTerm?id=GO:0034392	[]
9	5,6,7,8,9	susceptibility to natural killer cell mediated cytotoxicity	GO:0042271	0.0205	0.0481	0	-0.33	12.23	-2.88385	PVRL2|0.0887	1	5	159	38520	http://www.ebi.ac.uk/QuickGO/GTerm?id=GO:0042271	[]
6	6	vesicle uncoating	GO:0072319	0.0205	0.0481	0	-0.33	12.23	-2.88385	HSPA8|4.3251	1	5	159	38520	http://www.ebi.ac.uk/QuickGO/GTerm?id=GO:0072319	[]
5	5	substrate-dependent cell migration, cell attachment to substrate	GO:0006931	0.0205	0.0481	0	-0.33	12.23	-2.88385	FBLN1|0.1067	1	5	159	38520	http://www.ebi.ac.uk/QuickGO/GTerm?id=GO:0006931	[]
5	5	positive regulation of response to reactive oxygen species	GO:1901033	0.0205	0.0481	0	-0.33	12.23	-2.88385	PARK7|5.445	1	5	159	38520	http://www.ebi.ac.uk/QuickGO/GTerm?id=GO:1901033	[]
5	4,5	maintenance of location in cell	GO:0051651	0.0205	0.0481	1.73	-0.15	12.23	-2.88385	ALB|1.2246;GAA|14.4544;DAG1|3.02	3	140	159	38520	http://www.ebi.ac.uk/QuickGO/GTerm?id=GO:0051651	[]
5	4,5	positive regulation of catabolic process	GO:0009896	0.0206	0.0484	5.1	0.19	12.23	-2.88385	APOA4|15.2757;APOA1|18.8799;ANXA5|3.6308;PARK7|5.445;FABP1|14.3219;MYLK|0.6427	6	516	159	38520	http://www.ebi.ac.uk/QuickGO/GTerm?id=GO:0009896	[]
5	5	male gamete generation	GO:0048232	0.0206	0.0484	5.94	0.28	12.23	-2.88385	GGT1|5.2;SERPINA5|0.2109;SOD1|16.1436;PVRL2|0.0887;ACE|2.2909;PLEKHA1|85.5067	6	516	159	38520	http://www.ebi.ac.uk/QuickGO/GTerm?id=GO:0048232	[]
5	5	response to ketone	GO:1901654	0.0209	0.0489	1.08	-0.22	12.23	-2.88385	C3|1.4997;ASS1|2.4889;SERPINF1|3.2509	3	141	159	38520	http://www.ebi.ac.uk/QuickGO/GTerm?id=GO:1901654	[]
6	5,6	skin development	GO:0043588	0.0209	0.0489	-3.71	-0.71	12.23	-2.88385	ANXA1|0.2089;MADCAM1|0.7178;ACVR1B|0.1294;CDC42|99.0832	4	252	159	38520	http://www.ebi.ac.uk/QuickGO/GTerm?id=GO:0043588	[]
3	3	cellular component biogenesis	GO:0044085	0.021	0.0491	17.61	1.47	12.23	-2.88385	APOA4|15.2757;CDH1|0.7311;APOA1|18.8799;OLFM4|0.2512;HBB|1.6904;FBLN5|0.2249;HEG1|0.0839;CAT|15.417;ALDOA|1.7378;PPIA|7.5858;HBA1|1.6144;PVRL2|0.0887;HSPA1B|4.3652;ACTN4|10.8643;GPX3|15.1356;ANXA5|3.6308;PARK7|5.445;HSP90AA1|11.5878;DAG1|3.02;FGG|3.0479;ACE|2.2909;MYLK|0.6427;FLNC|0.6855;CDC42|99.0832	24	3761	159	38520	http://www.ebi.ac.uk/QuickGO/GTerm?id=GO:0044085	[]
5	5	regulation of mitochondrial membrane potential	GO:0051881	0.0211	0.0491	1.94	-0.13	12.23	-2.88385	SOD1|16.1436;PARK7|5.445	2	54	159	38520	http://www.ebi.ac.uk/QuickGO/GTerm?id=GO:0051881	[]
7	6,7	protein export from nucleus	GO:0006611	0.0211	0.0491	1.95	-0.13	12.23	-2.88385	PARK7|5.445;TXN|16.4437	2	54	159	38520	http://www.ebi.ac.uk/QuickGO/GTerm?id=GO:0006611	[]
5	5	muscle cell migration	GO:0014812	0.0211	0.0491	0.32	-0.3	12.23	-2.88385	ANXA1|0.2089;ACE|2.2909	2	54	159	38520	http://www.ebi.ac.uk/QuickGO/GTerm?id=GO:0014812	[]
7	6,7	nucleotide-binding domain, leucine rich repeat containing receptor signaling pathway	GO:0035872	0.0211	0.0491	1.86	-0.14	12.23	-2.88385	HSPA1B|4.3652;TXN|16.4437	2	54	159	38520	http://www.ebi.ac.uk/QuickGO/GTerm?id=GO:0035872	[]
9	7,8,9	negative regulation of ERK1 and ERK2 cascade	GO:0070373	0.0211	0.0491	-0.1	-0.34	12.23	-2.88385	FBLN1|0.1067;GSTP1|11.8032	2	54	159	38520	http://www.ebi.ac.uk/QuickGO/GTerm?id=GO:0070373	[]
10	6,7,8,9,10	positive regulation of phosphatidylinositol 3-kinase signaling	GO:0014068	0.0211	0.0491	-0.19	-0.35	12.23	-2.88385	F2|0.1009;CAT|15.417	2	54	159	38520	http://www.ebi.ac.uk/QuickGO/GTerm?id=GO:0014068	[]
5	5	endocrine system development	GO:0035270	0.0212	0.0495	-1.28	-0.46	12.23	-2.88385	CDH1|0.7311;ANXA1|0.2089;APOA1|18.8799	3	142	159	38520	http://www.ebi.ac.uk/QuickGO/GTerm?id=GO:0035270	[]
5	5	response to peptide hormone	GO:0043434	0.0215	0.0501	4.27	0.11	12.23	-2.88385	FBN1|0.207;ANXA1|0.2089;CAT|15.417;ASS1|2.4889;DAG1|3.02;FGFR4|6.9823	6	521	159	38520	http://www.ebi.ac.uk/QuickGO/GTerm?id=GO:0043434	[]
8	7,8	negative regulation of protein phosphorylation	GO:0001933	0.0215	0.0501	1.27	-0.2	12.23	-2.88385	FBLN1|0.1067;PARK7|5.445;GSTP1|11.8032;DAG1|3.02;SPINK1|0.5012	5	382	159	38520	http://www.ebi.ac.uk/QuickGO/GTerm?id=GO:0001933	[]
5	4,5	organ growth	GO:0035265	0.0216	0.0503	1.08	-0.22	12.23	-2.88385	PSAP|7.656;HEG1|0.0839;SOD1|16.1436	3	143	159	38520	http://www.ebi.ac.uk/QuickGO/GTerm?id=GO:0035265	[]
6	6	cellular response to ketone	GO:1901655	0.0218	0.0506	0.91	-0.24	12.23	-2.88385	ASS1|2.4889;SERPINF1|3.2509	2	55	159	38520	http://www.ebi.ac.uk/QuickGO/GTerm?id=GO:1901655	[]
10	7,8,9,10	regulation of extrinsic apoptotic signaling pathway via death domain receptors	GO:1902041	0.0218	0.0506	1.22	-0.2	12.23	-2.88385	PARK7|5.445;FGG|3.0479	2	55	159	38520	http://www.ebi.ac.uk/QuickGO/GTerm?id=GO:1902041	[]
5	5	amine metabolic process	GO:0009308	0.0222	0.0515	4.33	0.11	12.23	-2.88385	APOA4|15.2757;APOA1|18.8799;BHMT|13.5519;PARK7|5.445	4	257	159	38520	http://www.ebi.ac.uk/QuickGO/GTerm?id=GO:0009308	[]
6	5,6	regulation of neuron death	GO:1901214	0.0222	0.0515	4.45	0.13	12.23	-2.88385	SOD1|16.1436;SERPINF1|3.2509;PARK7|5.445;CDC42|99.0832	4	257	159	38520	http://www.ebi.ac.uk/QuickGO/GTerm?id=GO:1901214	[]
5	5	protein modification process	GO:0036211	0.0223	0.0516	27.74	2.51	12.23	-2.88385	LRP2|0.4365;TF|1.2823;C3|1.4997;PSAP|7.656;EFEMP1|0.0904;F2|0.1009;ANXA1|0.2089;APOA1|18.8799;GLB1|2.5119;GAPDH|6.0256;ARSA|15.8489;FBLN1|0.1067;SOD1|16.1436;CPE|4.4055;BHMT|13.5519;PROZ|13.0617;PPIA|7.5858;PRDX1|3.1623;S100A8|0.2965;S100A9|0.3945;PARK7|5.445;GSTP1|11.8032;EPHB4|0.6081;DAG1|3.02;FGG|3.0479;TXN|16.4437;SPINK1|0.5012;ELANE|0.4246;ACE|2.2909;ACVR1B|0.1294;MYLK|0.6427;PPIC|3.342;CPNE…	37	6479	159	38520	http://www.ebi.ac.uk/QuickGO/GTerm?id=GO:0036211	[]
6	6	cellular protein modification process	GO:0006464	0.0223	0.0516	27.74	2.51	12.23	-2.88385	LRP2|0.4365;TF|1.2823;C3|1.4997;PSAP|7.656;EFEMP1|0.0904;F2|0.1009;ANXA1|0.2089;APOA1|18.8799;GLB1|2.5119;GAPDH|6.0256;ARSA|15.8489;FBLN1|0.1067;SOD1|16.1436;CPE|4.4055;BHMT|13.5519;PROZ|13.0617;PPIA|7.5858;PRDX1|3.1623;S100A8|0.2965;S100A9|0.3945;PARK7|5.445;GSTP1|11.8032;EPHB4|0.6081;DAG1|3.02;FGG|3.0479;TXN|16.4437;SPINK1|0.5012;ELANE|0.4246;ACE|2.2909;ACVR1B|0.1294;MYLK|0.6427;PPIC|3.342;CPNE…	37	6479	159	38520	http://www.ebi.ac.uk/QuickGO/GTerm?id=GO:0006464	[]
5	5	vitamin metabolic process	GO:0006766	0.0224	0.0518	-0.74	-0.4	12.23	-2.88385	LRP2|0.4365;CUBN|0.3597;ACPP|5.4954	3	145	159	38520	http://www.ebi.ac.uk/QuickGO/GTerm?id=GO:0006766	[]
4	4	regulation of leukocyte migration	GO:0002685	0.0224	0.0518	-0.9	-0.42	12.23	-2.88385	OLFM4|0.2512;MADCAM1|0.7178;ECM1|7.9433	3	145	159	38520	http://www.ebi.ac.uk/QuickGO/GTerm?id=GO:0002685	[]
5	5	cellular response to molecule of bacterial origin	GO:0071219	0.0228	0.0527	0.6	-0.27	12.23	-2.88385	CD55|0.2535;ASS1|2.4889;GSTP1|11.8032	3	146	159	38520	http://www.ebi.ac.uk/QuickGO/GTerm?id=GO:0071219	[]
5	5	lung morphogenesis	GO:0060425	0.0233	0.0538	2.48	-0.07	12.23	-2.88385	DAG1|3.02;CDC42|99.0832	2	57	159	38520	http://www.ebi.ac.uk/QuickGO/GTerm?id=GO:0060425	[]
4	4	positive regulation of nitrogen compound metabolic process	GO:0051173	0.0235	0.0541	10.23	0.72	12.23	-2.88385	TF|1.2823;CDH1|0.7311;HSPA8|4.3251;HBB|1.6904;HEXB|2.729;CAT|15.417;ASS1|2.4889;HSPA1B|4.3652;S100A8|0.2965;S100A9|0.3945;PARK7|5.445;HSP90AA1|11.5878;ACVR1B|0.1294;FGFR4|6.9823;CDC42|99.0832	15	2057	159	38520	http://www.ebi.ac.uk/QuickGO/GTerm?id=GO:0051173	[]
9	6,7,8,9	positive regulation of kinase activity	GO:0033674	0.0238	0.0548	6	0.29	12.23	-2.88385	TF|1.2823;SOD1|16.1436;PARK7|5.445;TXN|16.4437;ELANE|0.4246;ACE|2.2909;CDC42|99.0832	7	683	159	38520	http://www.ebi.ac.uk/QuickGO/GTerm?id=GO:0033674	[]
9	7,9	regulation of cysteine-type endopeptidase activity involved in apoptotic process	GO:0043281	0.0239	0.055	-0.96	-0.43	12.23	-2.88385	S100A8|0.2965;S100A9|0.3945;PARK7|5.445;FABP1|14.3219	4	263	159	38520	http://www.ebi.ac.uk/QuickGO/GTerm?id=GO:0043281	[]
5	5	interleukin-1 production	GO:0032612	0.0241	0.055	2.35	-0.09	12.23	-2.88385	APOA1|18.8799;GSTP1|11.8032	2	58	159	38520	http://www.ebi.ac.uk/QuickGO/GTerm?id=GO:0032612	[]
7	6,7	platelet aggregation	GO:0070527	0.0241	0.055	0.71	-0.26	12.23	-2.88385	HBB|1.6904;FGG|3.0479	2	58	159	38520	http://www.ebi.ac.uk/QuickGO/GTerm?id=GO:0070527	[]
5	4,5	maternal process involved in female pregnancy	GO:0060135	0.0241	0.055	-2.06	-0.54	12.23	-2.88385	SPP1|0.1406;MMP7|0.0619	2	58	159	38520	http://www.ebi.ac.uk/QuickGO/GTerm?id=GO:0060135	[]
8	6,7,8	negative regulation of MAPK cascade	GO:0043409	0.0245	0.055	0.97	-0.23	12.23	-2.88385	FBLN1|0.1067;GSTP1|11.8032;DAG1|3.02	3	150	159	38520	http://www.ebi.ac.uk/QuickGO/GTerm?id=GO:0043409	[]
4	4	negative regulation of cell growth	GO:0030308	0.0245	0.055	-0.9	-0.42	12.23	-2.88385	SPP1|0.1406;ENO1|7.8705;ACVR1B|0.1294	3	150	159	38520	http://www.ebi.ac.uk/QuickGO/GTerm?id=GO:0030308	[]
9	8,9	rubidium ion transport	GO:0035826	0.0245	0.055	0	-0.33	12.23	-2.88385	CD63|2.0893	1	6	159	38520	http://www.ebi.ac.uk/QuickGO/GTerm?id=GO:0035826	[]
7	6,7	outer mitochondrial membrane organization	GO:0007008	0.0245	0.055	0	-0.33	12.23	-2.88385	HSP90AA1|11.5878	1	6	159	38520	http://www.ebi.ac.uk/QuickGO/GTerm?id=GO:0007008	[]
6	5,6	alditol catabolic process	GO:0019405	0.0245	0.055	0	-0.33	12.23	-2.88385	SORD|1.7219	1	6	159	38520	http://www.ebi.ac.uk/QuickGO/GTerm?id=GO:0019405	[]
9	7,8,9	regulation of peptidyl-cysteine S-nitrosylation	GO:2000169	0.0245	0.055	0	-0.33	12.23	-2.88385	ACE|2.2909	1	6	159	38520	http://www.ebi.ac.uk/QuickGO/GTerm?id=GO:2000169	[]
4	4	penetration of zona pellucida	GO:0007341	0.0245	0.055	0	-0.33	12.23	-2.88385	HEXB|2.729	1	6	159	38520	http://www.ebi.ac.uk/QuickGO/GTerm?id=GO:0007341	[]
4	4	neutrophil mediated cytotoxicity	GO:0070942	0.0245	0.055	0	-0.33	12.23	-2.88385	ELANE|0.4246	1	6	159	38520	http://www.ebi.ac.uk/QuickGO/GTerm?id=GO:0070942	[]
5	5	regulation of sperm motility	GO:1901317	0.0245	0.055	0	-0.33	12.23	-2.88385	ANXA5|3.6308	1	6	159	38520	http://www.ebi.ac.uk/QuickGO/GTerm?id=GO:1901317	[]
7	5,7	lipoprotein oxidation	GO:0042161	0.0245	0.055	0	-0.33	12.23	-2.88385	APOA4|15.2757	1	6	159	38520	http://www.ebi.ac.uk/QuickGO/GTerm?id=GO:0042161	[]
9	7,8,9	negative regulation of interleukin-1 beta secretion	GO:0050713	0.0245	0.055	0	-0.33	12.23	-2.88385	APOA1|18.8799	1	6	159	38520	http://www.ebi.ac.uk/QuickGO/GTerm?id=GO:0050713	[]
9	6,7,8,9	positive regulation of tumor necrosis factor-mediated signaling pathway	GO:1903265	0.0245	0.055	0	-0.33	12.23	-2.88385	HSPA1B|4.3652	1	6	159	38520	http://www.ebi.ac.uk/QuickGO/GTerm?id=GO:1903265	[]
7	7	response to UV-A	GO:0070141	0.0245	0.055	0	-0.33	12.23	-2.88385	MME|5.2481	1	6	159	38520	http://www.ebi.ac.uk/QuickGO/GTerm?id=GO:0070141	[]
7	6,7	regulation of phospholipid catabolic process	GO:0060696	0.0245	0.055	0	-0.33	12.23	-2.88385	IDH1|2.3335	1	6	159	38520	http://www.ebi.ac.uk/QuickGO/GTerm?id=GO:0060696	[]
7	5,6,7	negative regulation of interleukin-4 production	GO:0032713	0.0245	0.055	0	-0.33	12.23	-2.88385	SCGB1A1|0.3532	1	6	159	38520	http://www.ebi.ac.uk/QuickGO/GTerm?id=GO:0032713	[]
8	5,6,7,8	positive regulation of cellular amino acid metabolic process	GO:0045764	0.0245	0.055	0	-0.33	12.23	-2.88385	PARK7|5.445	1	6	159	38520	http://www.ebi.ac.uk/QuickGO/GTerm?id=GO:0045764	[]
7	5,6,7	sterol transmembrane transport	GO:0035382	0.0245	0.055	0	-0.33	12.23	-2.88385	APOA1|18.8799	1	6	159	38520	http://www.ebi.ac.uk/QuickGO/GTerm?id=GO:0035382	[]
8	7,8	positive regulation of myeloid cell apoptotic process	GO:0033034	0.0245	0.055	0	-0.33	12.23	-2.88385	ANXA1|0.2089	1	6	159	38520	http://www.ebi.ac.uk/QuickGO/GTerm?id=GO:0033034	[]
8	6,8	positive regulation of acute inflammatory response to antigenic stimulus	GO:0002866	0.0245	0.055	0	-0.33	12.23	-2.88385	C3|1.4997	1	6	159	38520	http://www.ebi.ac.uk/QuickGO/GTerm?id=GO:0002866	[]
8	6,7,8	negative regulation of hydrogen peroxide metabolic process	GO:0010727	0.0245	0.055	0	-0.33	12.23	-2.88385	HP|6.6069	1	6	159	38520	http://www.ebi.ac.uk/QuickGO/GTerm?id=GO:0010727	[]
10	8,9,10	regulation of prostaglandin biosynthetic process	GO:0031392	0.0245	0.055	0	-0.33	12.23	-2.88385	ANXA1|0.2089	1	6	159	38520	http://www.ebi.ac.uk/QuickGO/GTerm?id=GO:0031392	[]
8	7,8	regulation of unsaturated fatty acid biosynthetic process	GO:2001279	0.0245	0.055	0	-0.33	12.23	-2.88385	ANXA1|0.2089	1	6	159	38520	http://www.ebi.ac.uk/QuickGO/GTerm?id=GO:2001279	[]
9	7,8,9	regulation of sodium:proton antiporter activity	GO:0032415	0.0245	0.055	0	-0.33	12.23	-2.88385	ACTN4|10.8643	1	6	159	38520	http://www.ebi.ac.uk/QuickGO/GTerm?id=GO:0032415	[]
8	5,6,7,8	negative regulation of interleukin-6 biosynthetic process	GO:0045409	0.0245	0.055	0	-0.33	12.23	-2.88385	PRG4|0.2831	1	6	159	38520	http://www.ebi.ac.uk/QuickGO/GTerm?id=GO:0045409	[]
7	4,7	positive regulation of epithelial cell proliferation involved in lung morphogenesis	GO:0060501	0.0245	0.055	0	-0.33	12.23	-2.88385	CDC42|99.0832	1	6	159	38520	http://www.ebi.ac.uk/QuickGO/GTerm?id=GO:0060501	[]
7	5,7	response to yeast	GO:0001878	0.0245	0.055	0	-0.33	12.23	-2.88385	ELANE|0.4246	1	6	159	38520	http://www.ebi.ac.uk/QuickGO/GTerm?id=GO:0001878	[]
9	7,8,9	cholesterol import	GO:0070508	0.0245	0.055	0	-0.33	12.23	-2.88385	APOA1|18.8799	1	6	159	38520	http://www.ebi.ac.uk/QuickGO/GTerm?id=GO:0070508	[]
5	5	neutrophil mediated killing of symbiont cell	GO:0070943	0.0245	0.055	0	-0.33	12.23	-2.88385	ELANE|0.4246	1	6	159	38520	http://www.ebi.ac.uk/QuickGO/GTerm?id=GO:0070943	[]
8	6,7,8	sterol import	GO:0035376	0.0245	0.055	0	-0.33	12.23	-2.88385	APOA1|18.8799	1	6	159	38520	http://www.ebi.ac.uk/QuickGO/GTerm?id=GO:0035376	[]
6	6	lipoprotein modification	GO:0042160	0.0245	0.055	0	-0.33	12.23	-2.88385	APOA4|15.2757	1	6	159	38520	http://www.ebi.ac.uk/QuickGO/GTerm?id=GO:0042160	[]
5	5	fructose 1,6-bisphosphate metabolic process	GO:0030388	0.0245	0.055	0	-0.33	12.23	-2.88385	ALDOA|1.7378	1	6	159	38520	http://www.ebi.ac.uk/QuickGO/GTerm?id=GO:0030388	[]
8	7,8	negative regulation of serine-type peptidase activity	GO:1902572	0.0245	0.055	0	-0.33	12.23	-2.88385	SPINK1|0.5012	1	6	159	38520	http://www.ebi.ac.uk/QuickGO/GTerm?id=GO:1902572	[]
8	8	retrograde axon cargo transport	GO:0008090	0.0245	0.055	0	-0.33	12.23	-2.88385	SOD1|16.1436	1	6	159	38520	http://www.ebi.ac.uk/QuickGO/GTerm?id=GO:0008090	[]
10	5,9,10	regulation of nucleotide-binding oligomerization domain containing 2 signaling pathway	GO:0070432	0.0245	0.055	0	-0.33	12.23	-2.88385	HSPA1B|4.3652	1	6	159	38520	http://www.ebi.ac.uk/QuickGO/GTerm?id=GO:0070432	[]
7	5,7	chronic inflammatory response to antigenic stimulus	GO:0002439	0.0245	0.055	0	-0.33	12.23	-2.88385	AHCY|2.6546	1	6	159	38520	http://www.ebi.ac.uk/QuickGO/GTerm?id=GO:0002439	[]
8	5,6,7,8	negative regulation of cytokine secretion involved in immune response	GO:0002740	0.0245	0.055	0	-0.33	12.23	-2.88385	APOA1|18.8799	1	6	159	38520	http://www.ebi.ac.uk/QuickGO/GTerm?id=GO:0002740	[]
9	6,8,9	regulation of metal ion transport	GO:0010959	0.0247	0.0553	-1.36	-0.47	12.23	-2.88385	F2|0.1009;ACTN4|10.8643;SPINK1|0.5012;CD63|2.0893;MYLK|0.6427	5	396	159	38520	http://www.ebi.ac.uk/QuickGO/GTerm?id=GO:0010959	[]
6	6	primary alcohol metabolic process	GO:0034308	0.0248	0.0555	1.02	-0.22	12.23	-2.88385	PARK7|5.445;TTR|1.9055	2	59	159	38520	http://www.ebi.ac.uk/QuickGO/GTerm?id=GO:0034308	[]
5	4,5	regulation of tissue remodeling	GO:0034103	0.0248	0.0555	0.74	-0.25	12.23	-2.88385	TF|1.2823;SPP1|0.1406	2	59	159	38520	http://www.ebi.ac.uk/QuickGO/GTerm?id=GO:0034103	[]
7	7	neuromuscular process controlling balance	GO:0050885	0.0248	0.0555	1.6	-0.16	12.23	-2.88385	GAA|14.4544;HEXB|2.729	2	59	159	38520	http://www.ebi.ac.uk/QuickGO/GTerm?id=GO:0050885	[]
5	4,5	tissue regeneration	GO:0042246	0.0248	0.0555	-2.63	-0.6	12.23	-2.88385	ANXA1|0.2089;KLK6|0.0113	2	59	159	38520	http://www.ebi.ac.uk/QuickGO/GTerm?id=GO:0042246	[]
4	4	stem cell proliferation	GO:0072089	0.0253	0.0566	-0.36	-0.36	12.23	-2.88385	FBLN1|0.1067;PRG4|0.2831;ACE|2.2909	3	152	159	38520	http://www.ebi.ac.uk/QuickGO/GTerm?id=GO:0072089	[]
5	4,5	establishment of protein localization	GO:0045184	0.0255	0.057	15.68	1.28	12.23	-2.88385	TF|1.2823;CUBN|0.3597;CDH1|0.7311;ANXA1|0.2089;APOA1|18.8799;ANXA4|3.342;FBLN1|0.1067;PPIA|7.5858;PRDX1|3.1623;ACTN4|10.8643;PARK7|5.445;HSP90AA1|11.5878;DAG1|3.02;FGG|3.0479;PNP|7.7983;TXN|16.4437;CD63|2.0893;PLEKHA1|85.5067;CDC42|99.0832	19	2841	159	38520	http://www.ebi.ac.uk/QuickGO/GTerm?id=GO:0045184	[]
9	8,9	NADP metabolic process	GO:0006739	0.0256	0.0571	1.55	-0.17	12.23	-2.88385	TPI1|15.2757;IDH1|2.3335	2	60	159	38520	http://www.ebi.ac.uk/QuickGO/GTerm?id=GO:0006739	[]
6	5,6	regulation of chemokine production	GO:0032642	0.0256	0.0571	-0.7	-0.4	12.23	-2.88385	GSTP1|11.8032;ELANE|0.4246	2	60	159	38520	http://www.ebi.ac.uk/QuickGO/GTerm?id=GO:0032642	[]
6	6	regulation of monooxygenase activity	GO:0032768	0.0256	0.0571	1.8	-0.14	12.23	-2.88385	PARK7|5.445;HSP90AA1|11.5878	2	60	159	38520	http://www.ebi.ac.uk/QuickGO/GTerm?id=GO:0032768	[]
6	4,6	regulation of epithelial cell migration	GO:0010632	0.0266	0.0593	1.34	-0.19	12.23	-2.88385	APOH|11.9124;SERPINF1|3.2509;SH3BGRL3|0.0461	3	155	159	38520	http://www.ebi.ac.uk/QuickGO/GTerm?id=GO:0010632	[]
4	4	negative regulation of cell differentiation	GO:0045596	0.0267	0.0594	-7.16	-1.06	12.23	-2.88385	EFEMP1|0.0904;SPP1|0.1406;VASN|0.1738;F2|0.1009;FBLN1|0.1067;ACTN4|10.8643;ARHGDIA|31.3329	7	700	159	38520	http://www.ebi.ac.uk/QuickGO/GTerm?id=GO:0045596	[]
7	6,7	anion transport	GO:0006820	0.0272	0.0603	6.6	0.35	12.23	-2.88385	ALB|1.2246;APOA4|15.2757;ANXA1|0.2089;APOA1|18.8799;HBB|1.6904;CA1|26.3027;HBA1|1.6144;FABP1|14.3219;ACE|2.2909	9	1027	159	38520	http://www.ebi.ac.uk/QuickGO/GTerm?id=GO:0006820	[]
5	5	sprouting angiogenesis	GO:0002040	0.0272	0.0603	-1.78	-0.51	12.23	-2.88385	EPHB4|0.6081;CDC42|99.0832	2	62	159	38520	http://www.ebi.ac.uk/QuickGO/GTerm?id=GO:0002040	[]
4	4	body morphogenesis	GO:0010171	0.0272	0.0603	2.41	-0.08	12.23	-2.88385	DAG1|3.02;PLEKHA1|85.5067	2	62	159	38520	http://www.ebi.ac.uk/QuickGO/GTerm?id=GO:0010171	[]
7	3,4,6,7	natural killer cell mediated cytotoxicity	GO:0042267	0.0272	0.0603	0.55	-0.27	12.23	-2.88385	PVRL2|0.0887;PRDX1|3.1623	2	62	159	38520	http://www.ebi.ac.uk/QuickGO/GTerm?id=GO:0042267	[]
7	7	negative regulation of protein processing	GO:0010955	0.0272	0.0603	-0.28	-0.36	12.23	-2.88385	A2M|7.5858;CD55|0.2535	2	62	159	38520	http://www.ebi.ac.uk/QuickGO/GTerm?id=GO:0010955	[]
7	6,7	negative regulation of protein maturation	GO:1903318	0.0272	0.0603	-0.28	-0.36	12.23	-2.88385	A2M|7.5858;CD55|0.2535	2	62	159	38520	http://www.ebi.ac.uk/QuickGO/GTerm?id=GO:1903318	[]
6	5,6	cardiac ventricle morphogenesis	GO:0003208	0.0272	0.0603	0.43	-0.28	12.23	-2.88385	HEG1|0.0839;CPE|4.4055	2	62	159	38520	http://www.ebi.ac.uk/QuickGO/GTerm?id=GO:0003208	[]
4	3,4	regulation of plasma lipoprotein particle levels	GO:0097006	0.0272	0.0603	2.46	-0.08	12.23	-2.88385	APOA4|15.2757;APOA1|18.8799	2	62	159	38520	http://www.ebi.ac.uk/QuickGO/GTerm?id=GO:0097006	[]
8	8	regulation of cysteine-type endopeptidase activity	GO:2000116	0.0276	0.061	-0.96	-0.43	12.23	-2.88385	S100A8|0.2965;S100A9|0.3945;PARK7|5.445;FABP1|14.3219	4	275	159	38520	http://www.ebi.ac.uk/QuickGO/GTerm?id=GO:2000116	[]
5	5	lipoprotein metabolic process	GO:0042157	0.0279	0.0611	2.99	-0.02	12.23	-2.88385	ALB|1.2246;CUBN|0.3597;APOA4|15.2757;APOA1|18.8799	4	276	159	38520	http://www.ebi.ac.uk/QuickGO/GTerm?id=GO:0042157	[]
6	6	response to UV	GO:0009411	0.028	0.0611	0.37	-0.29	12.23	-2.88385	MME|5.2481;CAT|15.417;ELANE|0.4246	3	158	159	38520	http://www.ebi.ac.uk/QuickGO/GTerm?id=GO:0009411	[]
7	7	tricarboxylic acid metabolic process	GO:0072350	0.0281	0.0611	0.76	-0.25	12.23	-2.88385	ASS1|2.4889;IDH1|2.3335	2	63	159	38520	http://www.ebi.ac.uk/QuickGO/GTerm?id=GO:0072350	[]
6	6	serine family amino acid metabolic process	GO:0009069	0.0281	0.0611	1.14	-0.21	12.23	-2.88385	GGT1|5.2;AHCY|2.6546	2	63	159	38520	http://www.ebi.ac.uk/QuickGO/GTerm?id=GO:0009069	[]
10	7,8,9,10	positive regulation of ERK1 and ERK2 cascade	GO:0070374	0.0284	0.0611	1.5	-0.17	12.23	-2.88385	C3|1.4997;FGG|3.0479;FGFR4|6.9823	3	159	159	38520	http://www.ebi.ac.uk/QuickGO/GTerm?id=GO:0070374	[]
8	7,8	aspartate metabolic process	GO:0006531	0.0285	0.0611	0	-0.33	12.23	-2.88385	ASS1|2.4889	1	7	159	38520	http://www.ebi.ac.uk/QuickGO/GTerm?id=GO:0006531	[]
9	7,8,9	regulation of protein deubiquitination	GO:0090085	0.0285	0.0611	0	-0.33	12.23	-2.88385	PARK7|5.445	1	7	159	38520	http://www.ebi.ac.uk/QuickGO/GTerm?id=GO:0090085	[]
7	7	neuron intrinsic apoptotic signaling pathway in response to oxidative stress	GO:0036480	0.0285	0.0611	0	-0.33	12.23	-2.88385	PARK7|5.445	1	7	159	38520	http://www.ebi.ac.uk/QuickGO/GTerm?id=GO:0036480	[]
7	7	positive regulation of protein homodimerization activity	GO:0090073	0.0285	0.0611	0	-0.33	12.23	-2.88385	PARK7|5.445	1	7	159	38520	http://www.ebi.ac.uk/QuickGO/GTerm?id=GO:0090073	[]
6	6	basement membrane assembly	GO:0070831	0.0285	0.0611	0	-0.33	12.23	-2.88385	DAG1|3.02	1	7	159	38520	http://www.ebi.ac.uk/QuickGO/GTerm?id=GO:0070831	[]
6	6	pyridine-containing compound catabolic process	GO:0072526	0.0285	0.0611	0	-0.33	12.23	-2.88385	PNP|7.7983	1	7	159	38520	http://www.ebi.ac.uk/QuickGO/GTerm?id=GO:0072526	[]
8	6,7,8	regulation of hydrogen peroxide-mediated programmed cell death	GO:1901298	0.0285	0.0611	0	-0.33	12.23	-2.88385	PARK7|5.445	1	7	159	38520	http://www.ebi.ac.uk/QuickGO/GTerm?id=GO:1901298	[]
8	8	regulation of serine-type endopeptidase activity	GO:1900003	0.0285	0.0611	0	-0.33	12.23	-2.88385	SPINK1|0.5012	1	7	159	38520	http://www.ebi.ac.uk/QuickGO/GTerm?id=GO:1900003	[]
8	7,8	regulation of oxidative stress-induced neuron intrinsic apoptotic signaling pathway	GO:1903376	0.0285	0.0611	0	-0.33	12.23	-2.88385	PARK7|5.445	1	7	159	38520	http://www.ebi.ac.uk/QuickGO/GTerm?id=GO:1903376	[]
10	7,8,9,10	peripheral nervous system axon regeneration	GO:0014012	0.0285	0.0611	0	-0.33	12.23	-2.88385	APOA1|18.8799	1	7	159	38520	http://www.ebi.ac.uk/QuickGO/GTerm?id=GO:0014012	[]
6	6	cobalamin transport	GO:0015889	0.0285	0.0611	0	-0.33	12.23	-2.88385	CUBN|0.3597	1	7	159	38520	http://www.ebi.ac.uk/QuickGO/GTerm?id=GO:0015889	[]
6	5,6	natural killer cell mediated immune response to tumor cell	GO:0002423	0.0285	0.0611	0	-0.33	12.23	-2.88385	PVRL2|0.0887	1	7	159	38520	http://www.ebi.ac.uk/QuickGO/GTerm?id=GO:0002423	[]
6	5,6	negative regulation of interleukin-5 production	GO:0032714	0.0285	0.0611	0	-0.33	12.23	-2.88385	SCGB1A1|0.3532	1	7	159	38520	http://www.ebi.ac.uk/QuickGO/GTerm?id=GO:0032714	[]
6	5,6	activation of membrane attack complex	GO:0001905	0.0285	0.0611	0	-0.33	12.23	-2.88385	C3|1.4997	1	7	159	38520	http://www.ebi.ac.uk/QuickGO/GTerm?id=GO:0001905	[]
6	6	monocyte chemotactic protein-1 production	GO:0071605	0.0285	0.0611	0	-0.33	12.23	-2.88385	GSTP1|11.8032	1	7	159	38520	http://www.ebi.ac.uk/QuickGO/GTerm?id=GO:0071605	[]
6	5,6	male mating behavior	GO:0060179	0.0285	0.0611	0	-0.33	12.23	-2.88385	HEXB|2.729	1	7	159	38520	http://www.ebi.ac.uk/QuickGO/GTerm?id=GO:0060179	[]
4	4	cell adhesion molecule production	GO:0060352	0.0285	0.0611	0	-0.33	12.23	-2.88385	APOA1|18.8799	1	7	159	38520	http://www.ebi.ac.uk/QuickGO/GTerm?id=GO:0060352	[]
6	5,6	epithelial-mesenchymal cell signaling	GO:0060684	0.0285	0.0611	0	-0.33	12.23	-2.88385	CDC42|99.0832	1	7	159	38520	http://www.ebi.ac.uk/QuickGO/GTerm?id=GO:0060684	[]
4	4	negative regulation of epithelial cell proliferation involved in prostate gland development	GO:0060770	0.0285	0.0611	0	-0.33	12.23	-2.88385	SERPINF1|3.2509	1	7	159	38520	http://www.ebi.ac.uk/QuickGO/GTerm?id=GO:0060770	[]
7	6,7	negative regulation of heterotypic cell-cell adhesion	GO:0034115	0.0285	0.0611	0	-0.33	12.23	-2.88385	APOA1|18.8799	1	7	159	38520	http://www.ebi.ac.uk/QuickGO/GTerm?id=GO:0034115	[]
7	6,7	positive regulation of natural killer cell mediated immune response to tumor cell	GO:0002857	0.0285	0.0611	0	-0.33	12.23	-2.88385	PVRL2|0.0887	1	7	159	38520	http://www.ebi.ac.uk/QuickGO/GTerm?id=GO:0002857	[]
5	5	ketone catabolic process	GO:0042182	0.0285	0.0611	0	-0.33	12.23	-2.88385	PARK7|5.445	1	7	159	38520	http://www.ebi.ac.uk/QuickGO/GTerm?id=GO:0042182	[]
9	7,9	regulation of hypersensitivity	GO:0002883	0.0285	0.0611	0	-0.33	12.23	-2.88385	C3|1.4997	1	7	159	38520	http://www.ebi.ac.uk/QuickGO/GTerm?id=GO:0002883	[]
6	6	regulation of cell-cell adhesion involved in gastrulation	GO:0070587	0.0285	0.0611	0	-0.33	12.23	-2.88385	APOA1|18.8799	1	7	159	38520	http://www.ebi.ac.uk/QuickGO/GTerm?id=GO:0070587	[]
7	7	cellular response to potassium ion	GO:0035865	0.0285	0.0611	0	-0.33	12.23	-2.88385	SOD1|16.1436	1	7	159	38520	http://www.ebi.ac.uk/QuickGO/GTerm?id=GO:0035865	[]
6	6	astrocyte cell migration	GO:0043615	0.0285	0.0611	0	-0.33	12.23	-2.88385	HEXB|2.729	1	7	159	38520	http://www.ebi.ac.uk/QuickGO/GTerm?id=GO:0043615	[]
6	5,6	trophoblast cell migration	GO:0061450	0.0285	0.0611	0	-0.33	12.23	-2.88385	ACVR1B|0.1294	1	7	159	38520	http://www.ebi.ac.uk/QuickGO/GTerm?id=GO:0061450	[]
6	6	elastic fiber assembly	GO:0048251	0.0285	0.0611	0	-0.33	12.23	-2.88385	FBLN5|0.2249	1	7	159	38520	http://www.ebi.ac.uk/QuickGO/GTerm?id=GO:0048251	[]
7	4,6,7	regulation of trophoblast cell migration	GO:1901163	0.0285	0.0611	0	-0.33	12.23	-2.88385	ACVR1B|0.1294	1	7	159	38520	http://www.ebi.ac.uk/QuickGO/GTerm?id=GO:1901163	[]
6	5,6	negative regulation of lipoprotein metabolic process	GO:0050748	0.0285	0.0611	0	-0.33	12.23	-2.88385	APOA4|15.2757	1	7	159	38520	http://www.ebi.ac.uk/QuickGO/GTerm?id=GO:0050748	[]
7	6,7	regulation of activation of membrane attack complex	GO:0001969	0.0285	0.0611	0	-0.33	12.23	-2.88385	C3|1.4997	1	7	159	38520	http://www.ebi.ac.uk/QuickGO/GTerm?id=GO:0001969	[]
8	7,8	negative regulation of phospholipase activity	GO:0010519	0.0285	0.0611	0	-0.33	12.23	-2.88385	ANXA1|0.2089	1	7	159	38520	http://www.ebi.ac.uk/QuickGO/GTerm?id=GO:0010519	[]
[truncated: 1,783 more rows]

## Sheet: CC
Tbale SIIB. Statistically significant GO terms in the category of cellular component for AKI-24 h/AKI-Pre.
maxLevel	levels	GO_Name	GO_ID	Pvalue	Pvalue_adjusted	Genes	Count	Pop_Hit	List_Total	Background_Genes	URL
[truncated: 353 more rows]

[truncated: 1 more sheets: MF]
